# Supplementary material for: A Genome-Wide Association Study Identifies Five Loci Influencing Facial Morphology in Europeans
Source: PLoS Genet. 2012 Sep 13;8(9):e1002932. doi: 10.1371/journal.pgen.1002932 (PMC3441666; doi:10.1371/journal.pgen.1002932)
Supplement: Table S1 — Correlation between PC and Euclidean distances in discovery cohorts. The color shade is independent between columns. (XLSX) [file pgen.1002932.s002.xlsx]

## Sheet: TS1
Table S1. Correlation between PC and Euclidean distances in discovery cohorts
	PC1	PC2	PC3	PC4	PC5	PC6	PC7	PC8	PC9	PC10	PC11
% Var	42.4503	21.5964	10.968	5.27571	3.66895	2.87111	2.57628	2.15309	1.99154	1.27668	1.21239
Centroid Size	0.958162	0.276656	-0.0472939	0.0362096	0.0175915	0.0155532	0.00846464	0.00119437	-0.00464157	0.00330401	-0.0077882
ZygR-ZygL	0.664803	0.539326	-0.413704	0.268717	-0.0695017	0.00177878	0.103971	0.0460334	0.0760468	0.0138262	-0.00359363
ZygR-EyeR	0.628346	0.585946	-0.122698	-0.281401	-0.0940557	0.0296449	0.099041	0.0692423	0.295126	-0.0206608	0.0815517
ZygR-EyeL	0.694172	0.626897	-0.276024	-0.0115891	-0.0590798	0.0912308	0.021659	-0.0664027	-0.0578206	-0.0252428	0.00829716
ZygR-AlrR	0.81197	0.300803	0.24898	0.0504237	-0.15931	0.227659	0.207545	-0.131514	0.134946	0.0423943	-0.0487074
ZygR-AlrL	0.85701	0.422298	0.0259299	0.0971846	-0.109846	-0.00333933	-0.102849	-0.106144	0.14256	0.0610544	-0.0225688
ZygR-Nsn	0.719577	0.606757	-0.0170405	-0.0541541	0.212396	0.0348274	0.102721	-0.0468046	0.114004	0.0833441	-0.0361844
ZygR-Prn	0.884115	0.321512	0.194876	0.0342408	0.00883549	-0.0748923	0.113928	-0.180653	0.106373	-0.0796564	0.0273116
ZygR-Sbn	0.917022	0.223376	0.148447	0.0691765	-0.135967	0.0540797	0.0744788	-0.159837	0.124623	0.0213789	0.00403359
ZygL-EyeR	0.685936	0.626975	-0.289768	-0.0160598	-0.0510731	0.101929	0.0154909	0.013233	-0.112039	-0.0237906	0.00702493
ZygL-EyeL	0.604719	0.605858	-0.143401	-0.292634	-0.0699796	0.0514545	0.0816831	0.183603	0.230332	-0.0130087	0.0774261
ZygL-AlrR	0.845928	0.442164	0.0227578	0.0931232	-0.0861036	-0.0132165	-0.128493	0.173648	0.0223621	0.0622806	-0.0244408
ZygL-AlrL	0.812329	0.316888	0.225907	0.0461835	-0.131493	0.213237	0.160522	0.262442	-0.0292954	0.0363971	-0.0515725
ZygL-Nsn	0.711692	0.611393	-0.0247862	-0.056111	0.231966	0.0390479	0.0819978	0.117101	0.0210111	0.090755	-0.0434421
ZygL-Prn	0.882772	0.32583	0.192773	0.0314838	0.0322872	-0.106758	0.0744705	0.201488	-0.0576082	-0.082279	0.0303509
ZygL-Sbn	0.911291	0.250103	0.151128	0.0666748	-0.103973	0.0246888	0.0338276	0.226719	-0.0359297	0.0122932	-0.000904486
EyeR-EyeL	0.557934	0.531941	-0.211475	-0.0147476	-0.00109483	0.196861	-0.12497	-0.215584	-0.504039	-0.056528	-0.0481071
EyeR-AlrR	0.742786	-0.56129	-0.0596525	0.0599611	0.0640239	0.258085	0.0318342	-0.0937808	-0.0376016	0.0569754	0.0646335
EyeR-AlrL	0.897256	-0.0907813	-0.133959	0.0500065	0.046013	0.0898673	-0.259591	-0.205402	-0.0894541	0.0527839	0.0372468
EyeR-Nsn	0.528456	0.378607	0.112247	0.223041	0.51892	0.115927	-0.0120869	-0.238088	-0.283284	0.140193	-0.137982
EyeR-Prn	0.863563	-0.25919	0.0958969	0.173079	0.229581	0.0205555	-0.0125241	-0.214928	-0.0205698	-0.179039	-0.00101911
EyeR-Sbn	0.851012	-0.447722	-0.0611564	0.0591136	0.0254612	0.128911	-0.0586281	-0.157921	-0.0381188	-0.00129622	0.0399471
EyeL-AlrR	0.894139	-0.106963	-0.125488	0.0473093	0.0614518	0.0725794	-0.28712	0.0594342	-0.183954	0.0623068	0.0432403
EyeL-AlrL	0.74366	-0.562285	-0.0859125	0.0548862	0.0696921	0.245977	0.00408739	0.0759505	-0.09332	0.0437375	0.0701676
EyeL-Nsn	0.534831	0.350533	0.130436	0.23201	0.521123	0.0925712	-0.0320772	-0.0619067	-0.374206	0.144687	-0.143152
EyeL-Prn	0.862643	-0.274927	0.100599	0.169399	0.236681	-0.0169913	-0.0446867	0.115315	-0.148599	-0.180801	0.00838954
EyeL-Sbn	0.847326	-0.455234	-0.0571966	0.0569949	0.042051	0.104992	-0.0867925	0.0930136	-0.129053	-0.00796346	0.0419061
AlrR-AlrL	0.599886	0.348649	-0.0650326	0.0268384	0.00360974	-0.343333	-0.612988	-0.0363906	0.0894847	0.088568	0.0156612
AlrR-Nsn	0.795837	-0.366309	-0.253208	-0.245034	0.077728	-0.181049	0.0313257	0.0231224	-0.0362817	0.151738	-0.114729
AlrR-Prn	0.735702	0.128176	0.0575483	-0.00754425	0.180964	-0.520268	-0.0167063	-0.198068	-0.027114	-0.106557	0.194428
AlrR-Sbn	0.744735	0.107967	-0.0562532	0.0266582	-0.0243933	-0.306899	-0.431887	-0.186577	0.119793	0.0156748	0.0441885
AlrL-Nsn	0.806922	-0.348985	-0.259535	-0.238334	0.073641	-0.17239	0.027595	-0.0590075	-0.0155056	0.13862	-0.116079
AlrL-Prn	0.736206	0.124247	0.082757	-0.00952209	0.177041	-0.545272	-0.0393574	0.0284019	-0.125613	-0.0994588	0.198672
AlrL-Sbn	0.715961	0.146345	-0.00119174	0.0283518	0.011531	-0.372997	-0.476346	0.114602	0.00117213	0.00182138	0.032737
Nsn-Prn	0.803665	-0.438118	-0.15204	-0.150719	0.0246869	-0.153323	0.0431178	0.00287734	0.0290499	-0.201765	-0.20933
Nsn-Sbn	0.771883	-0.522662	-0.215369	-0.195407	-0.0114996	-0.114464	0.0430587	-0.0056898	-0.0167068	0.0575015	-0.122691
Prn-Sbn	0.620267	-0.109178	0.0138393	-0.0817722	0.171928	-0.528345	0.175441	-0.0834344	-0.15532	-0.0177823	0.224195
