# Supplementary material for: A Genome-Wide Association Study Identifies Five Loci Influencing Facial Morphology in Europeans
Source: PLoS Genet. 2012 Sep 13;8(9):e1002932. doi: 10.1371/journal.pgen.1002932 (PMC3441666; doi:10.1371/journal.pgen.1002932)
Supplement: Table S2 — Correlation matrix between pair-wise Euclidean distances and size in discovery cohorts. (XLSX) [file pgen.1002932.s003.xlsx]

## Sheet: TS2
Table S2. Correlation matrix between pair-wise Euclidean distances and size in discovery cohorts
			ZygR	ZygR	ZygR	ZygR	ZygR	ZygR	ZygR	ZygR	ZygL	ZygL	ZygL	ZygL	ZygL	ZygL	ZygL	EyeR	EyeR	EyeR	EyeR	EyeR	EyeR	EyeL	EyeL	EyeL	EyeL	EyeL	AlrR	AlrR	AlrR	AlrR	AlrL	AlrL	AlrL	Nsn	Nsn	Prn
		Size	ZygL	EyeR	EyeL	AlrR	AlrL	Nsn	Prn	Sbn	EyeR	EyeL	AlrR	AlrL	Nsn	Prn	Sbn	EyeL	AlrR	AlrL	Nsn	Prn	Sbn	AlrR	AlrL	Nsn	Prn	Sbn	AlrL	Nsn	Prn	Sbn	Nsn	Prn	Sbn	Prn	Sbn	Sbn
	Size		0.814968	0.75814	0.852064	0.854773	0.937568	0.861521	0.927404	0.934007	0.845343	0.742791	0.933673	0.861366	0.856606	0.928087	0.93683	0.69547	0.568084	0.844525	0.627438	0.762067	0.698647	0.83706	0.569421	0.625509	0.756416	0.693087	0.664596	0.666171	0.730702	0.736166	0.682121	0.729275	0.717532	0.650327	0.598367	0.560796
ZygR	ZygL	0.814968		0.750677	0.909164	0.650754	0.8165	0.801693	0.699413	0.70687	0.907073	0.748733	0.819841	0.66676	0.799316	0.700423	0.714815	0.679889	0.224401	0.570299	0.501663	0.409951	0.347969	0.556465	0.233611	0.485134	0.399348	0.339577	0.562355	0.368119	0.503456	0.540624	0.386746	0.49181	0.517553	0.322821	0.273279	0.316601
ZygR	EyeR	0.75814	0.750677		0.855856	0.731852	0.804038	0.872396	0.752974	0.729492	0.794016	0.890158	0.754559	0.67486	0.792318	0.702846	0.686591	0.522618	0.109643	0.434675	0.305473	0.273815	0.229814	0.43545	0.127585	0.2996	0.279502	0.233465	0.531944	0.355952	0.484589	0.495859	0.366782	0.479281	0.487653	0.300809	0.247374	0.305437
ZygR	EyeL	0.852064	0.909164	0.855856		0.731539	0.866894	0.894125	0.772317	0.762421	0.942014	0.802318	0.828082	0.699574	0.843496	0.736713	0.732017	0.841886	0.201332	0.608967	0.577808	0.40762	0.340537	0.60273	0.21244	0.55507	0.395063	0.334855	0.601486	0.374237	0.530748	0.561928	0.392532	0.516614	0.541618	0.313167	0.260421	0.321965
ZygR	AlrR	0.854773	0.650754	0.731852	0.731539		0.878445	0.797045	0.909832	0.943437	0.676117	0.643919	0.790571	0.865119	0.720286	0.808249	0.838997	0.540637	0.490172	0.641207	0.525311	0.631204	0.56216	0.590446	0.439541	0.491229	0.570137	0.511592	0.389881	0.420789	0.486067	0.475978	0.443841	0.47811	0.436959	0.451242	0.39774	0.358763
ZygR	AlrL	0.937568	0.8165	0.804038	0.866894	0.878445		0.874359	0.921836	0.939766	0.814471	0.734176	0.916732	0.801583	0.810749	0.853632	0.865077	0.658242	0.395036	0.77139	0.578439	0.626884	0.550721	0.714536	0.385306	0.544506	0.587295	0.513912	0.747455	0.489244	0.665004	0.755315	0.52487	0.648594	0.715294	0.475976	0.415781	0.428162
ZygR	Nsn	0.861521	0.801693	0.872396	0.894125	0.797045	0.874359		0.858599	0.80386	0.838263	0.798201	0.824382	0.740807	0.923318	0.804484	0.76035	0.675067	0.211207	0.570464	0.720188	0.483441	0.338071	0.551689	0.210372	0.662773	0.459883	0.325071	0.585562	0.397365	0.608827	0.556601	0.407475	0.589485	0.545697	0.319434	0.260371	0.398142
ZygR	Prn	0.927404	0.699413	0.752974	0.772317	0.909832	0.921836	0.858599		0.95729	0.725248	0.679075	0.847094	0.809829	0.791421	0.90126	0.869056	0.583158	0.459885	0.721507	0.610296	0.752827	0.601482	0.671577	0.424707	0.570557	0.680172	0.552388	0.595515	0.526843	0.79205	0.693945	0.550202	0.734359	0.634106	0.564508	0.470544	0.591156
ZygR	Sbn	0.934007	0.70687	0.729492	0.762421	0.943437	0.939766	0.80386	0.95729		0.712357	0.652384	0.850527	0.837669	0.735767	0.86307	0.894368	0.570968	0.559326	0.781827	0.540946	0.74606	0.698179	0.723416	0.529997	0.507541	0.684701	0.641977	0.573384	0.566778	0.675953	0.717955	0.597741	0.642402	0.624358	0.593329	0.54723	0.478049
ZygL	EyeR	0.845343	0.907073	0.794016	0.942014	0.676117	0.814471	0.838263	0.725248	0.712357		0.854314	0.863582	0.739515	0.890274	0.762135	0.762279	0.847983	0.205461	0.615712	0.57358	0.401781	0.341612	0.589995	0.206435	0.559719	0.386953	0.326645	0.592111	0.367896	0.514667	0.54854	0.392287	0.50994	0.533887	0.307042	0.257389	0.317729
ZygL	EyeL	0.742791	0.748733	0.890158	0.802318	0.643919	0.734176	0.798201	0.679075	0.652384	0.854314		0.797563	0.729856	0.866921	0.734126	0.720349	0.532305	0.101255	0.430367	0.324962	0.261526	0.213098	0.412653	0.0992056	0.287803	0.242857	0.200612	0.522537	0.337058	0.459048	0.474203	0.351271	0.456097	0.469209	0.275207	0.221813	0.277171
ZygL	AlrR	0.933673	0.819841	0.754559	0.828082	0.790571	0.916732	0.824382	0.847094	0.850527	0.863582	0.797563		0.884863	0.877571	0.919903	0.942067	0.661848	0.367724	0.712605	0.555323	0.579	0.502497	0.75609	0.379533	0.580434	0.608463	0.530236	0.74791	0.495555	0.637898	0.712065	0.492704	0.659137	0.746359	0.458631	0.399725	0.423918
ZygL	AlrL	0.861366	0.66676	0.67486	0.699574	0.865119	0.801583	0.740807	0.809829	0.837669	0.739515	0.729856	0.884863		0.804456	0.907063	0.946692	0.552239	0.443268	0.602244	0.4999	0.571876	0.515309	0.642639	0.477621	0.532401	0.620813	0.553156	0.402666	0.43515	0.468446	0.454468	0.433543	0.489661	0.47218	0.448006	0.395354	0.351588
ZygL	Nsn	0.856606	0.799316	0.792318	0.843496	0.720286	0.810749	0.923318	0.791421	0.735767	0.890274	0.866921	0.877571	0.804456		0.853967	0.811642	0.683828	0.20688	0.559916	0.686531	0.464215	0.324899	0.561508	0.209112	0.715258	0.468266	0.328302	0.582631	0.388553	0.584122	0.535028	0.409135	0.595982	0.554188	0.310986	0.254021	0.392039
ZygL	Prn	0.928087	0.700423	0.702846	0.736713	0.808249	0.853632	0.804484	0.90126	0.86307	0.762135	0.734126	0.919903	0.907063	0.853967		0.961146	0.581811	0.426793	0.680689	0.574216	0.683698	0.554535	0.715749	0.450754	0.613865	0.746965	0.594477	0.603436	0.538402	0.734883	0.637655	0.542494	0.798906	0.701349	0.562983	0.469686	0.5977
ZygL	Sbn	0.93683	0.714815	0.686591	0.732017	0.838997	0.865077	0.76035	0.869056	0.894368	0.762279	0.720349	0.942067	0.946692	0.811642	0.961146		0.576833	0.513429	0.723535	0.517639	0.680015	0.63015	0.772546	0.538014	0.556205	0.735822	0.676389	0.586222	0.574682	0.64187	0.644913	0.569075	0.683234	0.705334	0.580694	0.529819	0.478293
EyeR	EyeL	0.69547	0.679889	0.522618	0.841886	0.540637	0.658242	0.675067	0.583158	0.570968	0.847983	0.532305	0.661848	0.552239	0.683828	0.581811	0.576833		0.206404	0.612786	0.686795	0.392133	0.331902	0.593869	0.206292	0.675999	0.374174	0.318248	0.499306	0.277821	0.418852	0.454051	0.302368	0.409879	0.437486	0.220117	0.185695	0.2466
EyeR	AlrR	0.568084	0.224401	0.109643	0.201332	0.490172	0.395036	0.211207	0.459885	0.559326	0.205461	0.101255	0.367724	0.443268	0.20688	0.426793	0.513429	0.206404		0.786427	0.282944	0.837516	0.942894	0.761121	0.931571	0.273665	0.787307	0.899791	0.157272	0.775358	0.371227	0.388584	0.765212	0.358627	0.335292	0.786331	0.827082	0.426
EyeR	AlrL	0.844525	0.570299	0.434675	0.608967	0.641207	0.77139	0.570464	0.721507	0.781827	0.615712	0.430367	0.712605	0.602244	0.559916	0.680689	0.723535	0.612786	0.786427		0.557235	0.856042	0.885005	0.905621	0.759937	0.519163	0.792677	0.821791	0.65314	0.747879	0.643288	0.769509	0.798653	0.628861	0.690283	0.733534	0.731194	0.512195
EyeR	Nsn	0.627438	0.501663	0.305473	0.577808	0.525311	0.578439	0.720188	0.610296	0.540946	0.57358	0.324962	0.555323	0.4999	0.686531	0.574216	0.517639	0.686795	0.282944	0.557235		0.568459	0.364286	0.503833	0.248657	0.877428	0.502106	0.322572	0.409994	0.266987	0.491647	0.399717	0.274498	0.456332	0.380961	0.193088	0.155482	0.324673
EyeR	Prn	0.762067	0.409951	0.273815	0.40762	0.631204	0.626884	0.483441	0.752827	0.74606	0.401781	0.261526	0.579	0.571876	0.464215	0.683698	0.680015	0.392133	0.837516	0.856042	0.568459		0.903544	0.79333	0.781325	0.529488	0.909646	0.840339	0.419131	0.704288	0.710587	0.636829	0.724687	0.646961	0.553734	0.806708	0.730742	0.608794
EyeR	Sbn	0.698647	0.347969	0.229814	0.340537	0.56216	0.550721	0.338071	0.601482	0.698179	0.341612	0.213098	0.502497	0.515309	0.324899	0.554535	0.63015	0.331902	0.942894	0.885005	0.364286	0.903544		0.829344	0.905088	0.346775	0.845863	0.943351	0.351307	0.801484	0.538768	0.62561	0.822828	0.510516	0.513526	0.843757	0.881365	0.532287
EyeL	AlrR	0.83706	0.556465	0.43545	0.60273	0.590446	0.714536	0.551689	0.671577	0.723416	0.589995	0.412653	0.75609	0.642639	0.561508	0.715749	0.772546	0.593869	0.761121	0.905621	0.503833	0.79333	0.829344		0.796923	0.558733	0.855302	0.888476	0.65035	0.789032	0.623277	0.720335	0.762773	0.635774	0.738122	0.733835	0.737403	0.512651
EyeL	AlrL	0.569421	0.233611	0.127585	0.21244	0.439541	0.385306	0.210372	0.424707	0.529997	0.206435	0.0992056	0.379533	0.477621	0.209112	0.450754	0.538014	0.206292	0.931571	0.759937	0.248657	0.781325	0.905088	0.796923		0.290134	0.837718	0.946304	0.167092	0.771006	0.357529	0.39843	0.781045	0.369967	0.346156	0.791683	0.834701	0.421463
EyeL	Nsn	0.625509	0.485134	0.2996	0.55507	0.491229	0.544506	0.662773	0.570557	0.507541	0.559719	0.287803	0.580434	0.532401	0.715258	0.613865	0.556205	0.675999	0.273665	0.519163	0.877428	0.529488	0.346775	0.558733	0.290134		0.5712	0.378642	0.408599	0.269407	0.465551	0.376068	0.292206	0.494625	0.419097	0.206334	0.174147	0.343581
EyeL	Prn	0.756416	0.399348	0.279502	0.395063	0.570137	0.587295	0.459883	0.680172	0.684701	0.386953	0.242857	0.608463	0.620813	0.468266	0.746965	0.735822	0.374174	0.787307	0.792677	0.502106	0.909646	0.845863	0.855302	0.837718	0.5712		0.908813	0.420773	0.721631	0.649353	0.579637	0.718592	0.711493	0.622232	0.811981	0.740396	0.617714
EyeL	Sbn	0.693087	0.339577	0.233465	0.334855	0.511592	0.513912	0.325071	0.552388	0.641977	0.326645	0.200612	0.530236	0.553156	0.328302	0.594477	0.676389	0.318248	0.899791	0.821791	0.322572	0.840339	0.943351	0.888476	0.946304	0.378642	0.908813		0.353376	0.81847	0.51006	0.56815	0.806031	0.537619	0.57607	0.845212	0.882791	0.533877
AlrR	AlrL	0.664596	0.562355	0.531944	0.601486	0.389881	0.747455	0.585562	0.595515	0.573384	0.592111	0.522537	0.74791	0.402666	0.582631	0.603436	0.586222	0.499306	0.157272	0.65314	0.409994	0.419131	0.351307	0.65035	0.167092	0.408599	0.420773	0.353376		0.415559	0.672464	0.875924	0.431751	0.675046	0.896286	0.345879	0.299432	0.383439
AlrR	Nsn	0.666171	0.368119	0.355952	0.374237	0.420789	0.489244	0.397365	0.526843	0.566778	0.367896	0.337058	0.495555	0.43515	0.388553	0.538402	0.574682	0.277821	0.775358	0.747879	0.266987	0.704288	0.801484	0.789032	0.771006	0.269407	0.721631	0.81847	0.415559		0.606069	0.574915	0.964071	0.594717	0.560292	0.906825	0.942993	0.620798
AlrR	Prn	0.730702	0.503456	0.484589	0.530748	0.486067	0.665004	0.608827	0.79205	0.675953	0.514667	0.459048	0.637898	0.468446	0.584122	0.734883	0.64187	0.418852	0.371227	0.643288	0.491647	0.710587	0.538768	0.623277	0.357529	0.465551	0.649353	0.51006	0.672464	0.606069		0.779504	0.607924	0.890999	0.714546	0.593015	0.514782	0.805279
AlrR	Sbn	0.736166	0.540624	0.495859	0.561928	0.475978	0.755315	0.556601	0.693945	0.717955	0.54854	0.474203	0.712065	0.454468	0.535028	0.637655	0.644913	0.454051	0.388584	0.769509	0.399717	0.636829	0.62561	0.720335	0.39843	0.376068	0.579637	0.56815	0.875924	0.574915	0.779504		0.612853	0.704854	0.825523	0.566865	0.549158	0.506096
AlrL	Nsn	0.682121	0.386746	0.366782	0.392532	0.443841	0.52487	0.407475	0.550202	0.597741	0.392287	0.351271	0.492704	0.433543	0.409135	0.542494	0.569075	0.302368	0.765212	0.798653	0.274498	0.724687	0.822828	0.762773	0.781045	0.292206	0.718592	0.806031	0.431751	0.964071	0.607924	0.612853		0.615797	0.550523	0.909186	0.941248	0.624756
AlrL	Prn	0.729275	0.49181	0.479281	0.516614	0.47811	0.648594	0.589485	0.734359	0.642402	0.50994	0.456097	0.659137	0.489661	0.595982	0.798906	0.683234	0.409879	0.358627	0.628861	0.456332	0.646961	0.510516	0.635774	0.369967	0.494625	0.711493	0.537619	0.675046	0.594717	0.890999	0.704854	0.615797		0.794279	0.590043	0.514022	0.813855
AlrL	Sbn	0.717532	0.517553	0.487653	0.541618	0.436959	0.715294	0.545697	0.634106	0.624358	0.533887	0.469209	0.746359	0.47218	0.554188	0.701349	0.705334	0.437486	0.335292	0.690283	0.380961	0.553734	0.513526	0.738122	0.346156	0.419097	0.622232	0.57607	0.896286	0.560292	0.714546	0.825523	0.550523	0.794279		0.532269	0.496025	0.511172
Nsn	Prn	0.650327	0.322821	0.300809	0.313167	0.451242	0.475976	0.319434	0.564508	0.593329	0.307042	0.275207	0.458631	0.448006	0.310986	0.562983	0.580694	0.220117	0.786331	0.733534	0.193088	0.806708	0.843757	0.733835	0.791683	0.206334	0.811981	0.845212	0.345879	0.906825	0.593015	0.566865	0.909186	0.590043	0.532269		0.937837	0.590862
Nsn	Sbn	0.598367	0.273279	0.247374	0.260421	0.39774	0.415781	0.260371	0.470544	0.54723	0.257389	0.221813	0.399725	0.395354	0.254021	0.469686	0.529819	0.185695	0.827082	0.731194	0.155482	0.730742	0.881365	0.737403	0.834701	0.174147	0.740396	0.882791	0.299432	0.942993	0.514782	0.549158	0.941248	0.514022	0.496025	0.937837		0.613409
Prn	Sbn	0.560796	0.316601	0.305437	0.321965	0.358763	0.428162	0.398142	0.591156	0.478049	0.317729	0.277171	0.423918	0.351588	0.392039	0.5977	0.478293	0.2466	0.426	0.512195	0.324673	0.608794	0.532287	0.512651	0.421463	0.343581	0.617714	0.533877	0.383439	0.620798	0.805279	0.506096	0.624756	0.813855	0.511172	0.590862	0.613409
