# Supplementary material for: A Genome-Wide Association Study Identifies Five Loci Influencing Facial Morphology in Europeans
Source: PLoS Genet. 2012 Sep 13;8(9):e1002932. doi: 10.1371/journal.pgen.1002932 (PMC3441666; doi:10.1371/journal.pgen.1002932)
Supplement: Table S3 — Effect of sex and age on facial shape in discovery cohorts. Distances are presented in millimeters. P values were adjusted for centroid size. (XLSX) [file pgen.1002932.s004.xlsx]

## Sheet: TS3
Table S3. Effect of sex and age on face shape in discovery cohorts
		Male			Female
		N=2433			N=2955
Phenotype		Mean	SD		Mean	SD		P_sex		beta	P_age
Centroid Size		151.249	5.19021		140.855	4.68237		0		-0.0133554	0.0037325
ZygR-ZygL		133.467	5.3183		125.191	4.7967		1.68763e-12		0.0770758	1.86478e-111
ZygR-EyeR		58.6767	2.96228		53.9257	2.7675		3.17719e-45		0.0339212	1.1156e-53
ZygR-EyeL		110.216	4.20635		103.033	3.92131		8.91532e-17		0.0581931	1.97575e-113
ZygR-AlrR		82.0115	3.53567		77.2518	3.41209		7.15745e-28		-0.0333971	5.10123e-63
ZygR-AlrL		109.557	4.08092		101.769	3.61857		2.01691e-21		0.00649241	0.000228117
ZygR-Nsn		98.8961	3.52453		91.789	3.25839		4.81044e-96		0.0288391	1.16722e-38
ZygR-Prn		113.282	4.3412		104.492	4.09048		9.65002e-51		-0.0306606	1.07647e-49
ZygR-Sbn		101.797	4.28075		94.5664	3.98895		2.72685e-07		-0.0284323	8.53002e-56
ZygL-EyeR		110.006	4.3123		102.988	3.99208		1.75241e-08		0.0604257	4.20735e-116
ZygL-EyeL		58.4527	3.02646		53.8506	2.82279		2.40813e-34		0.0426325	1.16024e-79
ZygL-AlrR		108.792	4.06308		101.191	3.58429		1.87849e-16		0.0056595	0.00156643
ZygL-AlrL		81.661	3.49709		76.9727	3.36007		7.6971e-36		-0.0205887	1.68274e-26
ZygL-Nsn		98.844	3.59357		91.8562	3.28238		1.23442e-79		0.029829	1.21735e-39
ZygL-Prn		113.244	4.36629		104.458	4.05163		6.06942e-52		-0.0326491	6.14015e-57
ZygL-Sbn		101.377	4.20334		94.2327	3.84061		6.91986e-05		-0.0296751	5.98578e-66
EyeR-EyeL		65.1616	3.28155		61.5782	3.12835		0.00213974		0.0267219	1.19158e-27
EyeR-AlrR		46.1584	4.22247		44.4156	3.89515		7.1511e-159		-0.0395696	8.60529e-41
EyeR-AlrL		68.7519	3.83661		64.3709	3.15965		1.78916e-59		-0.00390535	0.0522152
EyeR-Nsn		41.4396	2.18747		39.0468	1.98744		7.8429e-09		-0.000285773	0.869882
EyeR-Prn		66.914	4.25903		62.3131	3.98017		3.93656e-25		-0.0371991	3.11996e-40
EyeR-Sbn		62.9028	5.20338		59.2149	4.74894		1.58725e-128		-0.0433318	1.08962e-38
EyeL-AlrR		68.2693	3.75791		64.1121	3.0891		6.71453e-66		-0.00613265	0.00203698
EyeL-AlrL		46.3218	4.24244		44.5732	3.94305		3.28772e-162		-0.0276261	2.34713e-20
EyeL-Nsn		41.648	2.23788		39.24	1.9837		2.98998e-09		-0.00729426	3.52864e-05
EyeL-Prn		67.1441	4.30124		62.5671	4.0086		2.97971e-25		-0.0412427	8.92075e-48
EyeL-Sbn		62.8304	5.15674		59.2522	4.64363		3.5456e-127		-0.0445785	1.24147e-41
AlrR-AlrL		39.1514	2.98449		34.7771	2.54842		1.56603e-87		0.0207532	1.459e-18
AlrR-Nsn		50.3681	4.21871		46.6918	3.51206		8.52875e-14		-0.0106802	0.000309998
AlrR-Prn		33.0355	2.2738		29.0017	2.00959		2.71289e-141		-0.00996506	1.68938e-08
AlrR-Sbn		22.1316	1.92704		19.5142	1.46957		1.09966e-32		0.00718633	7.2603e-08
AlrL-Nsn		50.8155	4.23027		46.942	3.53606		7.15901e-12		-0.00931631	0.00156731
AlrL-Prn		33.4198	2.29615		29.2427	2.08682		9.33121e-158		-0.0234902	9.14893e-39
AlrL-Sbn		22.2189	1.82883		19.5947	1.44885		8.98772e-61		-0.005613	2.46292e-05
Nsn-Prn		47.7024	4.62665		43.8186	4.20522		1.88752e-21		-0.0167822	7.37425e-07
Nsn-Sbn		52.6603	5.95597		48.9209	5.26575		3.42176e-54		-0.0392099	8.59998e-20
Prn-Sbn		21.0905	2.03669		18.9345	1.95353		2.68843e-23		-0.0321358	2.74715e-78
PC1		5.34894	6.04004		-4.40405	5.47163		3.8727e-72		-0.0338533	4.45293e-69
PC2		2.27319	5.11156		-1.87164	4.80621		5.39232e-94		0.0679018	1.69227e-49
PC3		-0.0377874	4.12229		0.0311123	3.55029		3.59236e-05		-0.0892312	4.82342e-146
PC4		-0.0147455	2.71312		0.0121407	2.59479		0.00170835		-0.0104563	2.43467e-05
PC5		0.321345	2.28506		-0.264579	2.10791		4.81929e-36		0.012995	1.72987e-10
PC6		-0.542565	1.88453		0.446721	1.89642		5.45256e-192		0.0121513	6.24505e-13
PC7		-0.0119917	1.98639		0.00987334	1.73168		0.358594		-0.013256	1.85663e-14
PC8		-0.00494036	1.82027		0.00406765	1.57902		0.653502		0.00248607	0.11709
PC9		0.115724	1.70396		-0.0952815	1.55529		6.72499e-12		0.0137047	1.30873e-19
PC10		-0.043564	1.41256		0.0358685	1.20431		0.00171703		-0.0093603	1.45767e-14
PC11		0.0283172	1.36634		-0.023315	1.18399		0.00388649		-0.00326404	0.00605998
Distances are presented in millimeters. P values were adjusted for centroid size.
