# Supplementary material for: A Genome-Wide Association Study Identifies Five Loci Influencing Facial Morphology in Europeans
Source: PLoS Genet. 2012 Sep 13;8(9):e1002932. doi: 10.1371/journal.pgen.1002932 (PMC3441666; doi:10.1371/journal.pgen.1002932)
Supplement: Table S4 — Heritability of facial shape phenotypes derived from 3D MRI in QTIMS. Twin correlations and proportions of variance due to additive genetic (A), common environmental (C), and unique environmental (E) influences, shown with 95% confidence intervals (age and sex adjusted). (XLSX) [file pgen.1002932.s005.xlsx]

## Sheet: TS4
Table S4. Heritability of facial shape phenotypes derived from 3D MRI in the QMITS cohort
Trait	Twin correlations				Proportion of variance (%)
	MZ (79 pairs)		DZ (90 pairs)		A		C		E
Centroid Size	0.78	(0.7-0.84)	0.33	(0.12-0.5)	78	(53-84)	0	(0-23)	22	(16-30)
ZygR-ZygL	0.83	(0.77-0.88)	0.51	(0.35-0.63)	64	(38-87)	19	(0-43)	17	(12-23)
ZygR-EyeR	0.66	(0.53-0.75)	0.2	(-0.02-0.39)	64	(40-74)	0	(0-19)	36	(26-49)
ZygR-EyeL	0.8	(0.72-0.85)	0.47	(0.3-0.6)	66	(37-85)	14	(0-41)	20	(15-28)
ZygR-AlrR	0.71	(0.6-0.78)	0.31	(0.1-0.48)	71	(39-78)	0	(0-27)	29	(22-40)
ZygR-AlrL	0.76	(0.67-0.82)	0.29	(0.09-0.46)	76	(53-82)	0	(0-20)	25	(18-34)
ZygR-Nsn	0.77	(0.68-0.83)	0.27	(0.06-0.45)	76	(55-83)	0	(0-18)	24	(17-33)
ZygR-Prn	0.65	(0.54-0.74)	0.3	(0.08-0.48)	65	(29-74)	0	(0-32)	35	(26-46)
ZygR-Sbn	0.71	(0.6-0.78)	0.28	(0.07-0.46)	70	(43-78)	0	(0-24)	30	(22-41)
ZygL-EyeR	0.76	(0.66-0.82)	0.52	(0.36-0.64)	47	(18-80)	29	(0-54)	24	(18-34)
ZygL-EyeL	0.66	(0.52-0.75)	0.35	(0.15-0.51)	61	(22-75)	4	(0-37)	35	(25-48)
ZygL-AlrR	0.76	(0.66-0.82)	0.28	(0.06-0.45)	75	(53-82)	0	(0-19)	25	(18-35)
ZygL-AlrL	0.73	(0.62-0.8)	0.27	(0.05-0.46)	72	(46-79)	0	(0-23)	28	(21-38)
ZygL-Nsn	0.79	(0.71-0.85)	0.39	(0.18-0.55)	79	(47-85)	0	(0-30)	21	(15-29)
ZygL-Prn	0.65	(0.52-0.74)	0.25	(0.01-0.44)	64	(33-73)	0	(0-27)	36	(27-48)
ZygL-Sbn	0.7	(0.59-0.78)	0.22	(0-0.42)	69	(46-77)	0	(0-20)	31	(23-42)
EyeR-EyeL	0.81	(0.74-0.86)	0.59	(0.43-0.7)	46	(21-77)	36	(5-58)	19	(14-26)
EyeR-AlrR	0.7	(0.58-0.78)	0.33	(0.12-0.49)	69	(36-77)	0	(0-29)	31	(23-42)
EyeR-AlrL	0.74	(0.64-0.81)	0.36	(0.16-0.52)	74	(39-81)	0	(0-31)	26	(19-36)
EyeR-Nsn	0.8	(0.72-0.86)	0.44	(0.24-0.59)	73	(41-86)	7	(0-37)	20	(14-28)
EyeR-Prn	0.64	(0.51-0.73)	0.31	(0.1-0.47)	63	(26-72)	0	(0-33)	37	(28-49)
EyeR-Sbn	0.72	(0.61-0.79)	0.33	(0.13-0.49)	71	(39-79)	0	(0-28)	29	(21-39)
EyeL-AlrR	0.69	(0.58-0.77)	0.2	(-0.02-0.39)	67	(46-76)	0	(0-18)	33	(24-45)
EyeL-AlrL	0.73	(0.62-0.8)	0.22	(0.02-0.4)	71	(51-79)	0	(0-16)	29	(21-41)
EyeL-Nsn	0.78	(0.69-0.84)	0.33	(0.1-0.51)	78	(50-84)	0	(0-25)	23	(16-32)
EyeL-Prn	0.59	(0.45-0.69)	0.12	(-0.1-0.32)	56	(32-67)	0	(0-18)	44	(33-58)				48
EyeL-Sbn	0.68	(0.56-0.76)	0.17	(-0.04-0.36)	66	(45-75)	0	(0-16)	34	(25-47)
AlrR-AlrL	0.77	(0.68-0.84)	0.26	(0.07-0.43)	76	(58-83)	0	(0-15)	24	(17-33)
AlrR-Nsn	0.79	(0.7-0.85)	0.24	(0.03-0.43)	78	(60-84)	0	(0-16)	22	(16-32)
AlrR-Prn	0.54	(0.39-0.65)	0.16	(-0.07-0.36)	52	(21-64)	0	(0-25)	48	(36-62)
AlrR-Sbn	0.59	(0.45-0.7)	0.15	(-0.06-0.34)	56	(31-68)	0	(0-19)	44	(32-59)
AlrL-Nsn	0.77	(0.67-0.83)	0.28	(0.06-0.46)	76	(54-83)	0	(0-20)	24	(17-34)
AlrL-Prn	0.5	(0.35-0.62)	0.11	(-0.11-0.31)	48	(19-60)	0	(0-22)	52	(40-68)
AlrL-Sbn	0.62	(0.48-0.72)	0.05	(-0.15-0.25)	56	(36-69)	0	(0-12)	44	(31-60)
Nsn-Prn	0.61	(0.48-0.71)	0.15	(-0.08-0.36)	59	(34-70)	0	(0-20)	41	(30-55)
Nsn-Sbn	0.77	(0.67-0.83)	0.22	(0.01-0.41)	76	(58-83)	0	(0-15)	24	(17-35)
Prn-Sbn	0.66	(0.53-0.75)	0.1	(-0.11-0.29)	62	(43-73)	0	(0-13)	38	(27-52)
PC1	0.76	(0.67-0.82)	0.34	(0.11-0.51)	76	(45-82)	0	(0-28)	24	(18-33)
PC2	0.73	(0.62-0.81)	0.25	(0.05-0.42)	72	(50-80)	0	(0-18)	28	(20-40)
PC3	0.8	(0.72-0.85)	0.54	(0.38-0.66)	52	(25-83)	28	(0-52)	20	(15-28)
PC4	0.83	(0.77-0.88)	0.47	(0.29-0.6)	74	(45-88)	10	(0-37)	17	(12-23)
PC5	0.69	(0.58-0.77)	0.31	(0.12-0.46)	68	(39-76)	0	(0-25)	32	(24-42)
PC6	0.72	(0.62-0.8)	0.27	(0-0.47)	72	(43-79)	0	(0-26)	28	(21-39)
PC7	0.71	(0.6-0.79)	0.25	(0.04-0.42)	70	(46-78)	0	(0-19)	30	(22-42)
PC8	0.74	(0.63-0.81)	0.45	(0.28-0.58)	57	(25-80)	17	(0-44)	26	(19-37)
PC9	0.65	(0.52-0.74)	0.43	(0.23-0.58)	42	(5-73)	22	(0-53)	35	(26-48)
PC10	0.56	(0.41-0.68)	0.38	(0.16-0.54)	36	(0-67)	20	(0-54)	44	(32-59)
PC11	0.64	(0.49-0.74)	0.13	(-0.08-0.33)	60	(38-72)	0	(0-16)	40	(28-56)
Twin correlations and proportions of variance due to additive genetic (A),
common environmental (C) and unique environmental (E) influences,
shown with 95% confidence intervals (age and sex adjusted).

## Sheet: TS5
Table S5. 102 SNPs associated (P<5e-7) with facial shape phenotypes in discovery phase GWAS
SNP	Chr	BP	Eff	Alt	FreqEff	Loci	Trait	MinP
rs4648477	1	3241835	A	G	0.275663	1	AlrL-Prn	1.28812e-08
rs4648478	1	3241867	T	C	0.275798	1	AlrL-Prn	1.12447e-08
rs7516150	1	3243749	T	C	0.278936	1	AlrL-Prn	2.51995e-08
rs7552331	1	3243801	A	G	0.27812	1	AlrL-Prn	3.96835e-08
rs1572037	1	3244229	C	T	0.278627	1	AlrL-Prn	2.45311e-08
rs1999527	1	3245968	A	C	0.279959	1	AlrL-Prn	1.72417e-08
rs4648379	1	3251376	T	C	0.279876	1	AlrL-Prn	1.1286e-08
rs1005999	2	104890223	T	C	0.240578	2	EyeR-AlrL	1.98148e-07
rs2422239	2	118745549	G	A	0.485552	3	PC8	2.54092e-07
rs2422241	2	118759506	G	A	0.441653	3	PC8	9.22453e-08
rs6749293	2	172875049	C	T	0.103726	4	Nsn-Prn	4.55738e-07
rs16863422	2	222698259	G	A	0.166419	5	EyeR-Nsn	2.06417e-08
rs12694574	2	222701977	C	T	0.166574	5	EyeR-Nsn	2.54719e-08
rs2894450	2	222705348	G	A	0.396158	5	EyeR-Nsn	1.55285e-07
rs974448	2	222713558	G	A	0.166388	5	EyeR-Nsn	1.56492e-08
rs1978859	2	222790575	T	C	0.332466	5	EyeL-Nsn	3.60961e-07
rs2034127	3	59343114	A	G	0.154154	6	Size	8.54087e-08
rs2034128	3	59343299	A	G	0.154025	6	Size	9.54515e-08
rs2034129	3	59343333	C	A	0.154003	6	Size	9.24636e-08
rs7628370	3	59345640	C	A	0.162888	6	Size	2.27165e-07
rs7617069	3	59345735	A	C	0.163819	6	Size	2.4672e-07
rs717463	3	59347740	C	T	0.159576	6	Size	4.73503e-07
rs894883	3	59348295	G	A	0.121305	6	ZygR-Sbn	1.33546e-07
rs7640340	3	59355051	G	A	0.159944	6	Size	3.0663e-07
rs875143	3	59355411	T	C	0.159383	6	Size	4.20994e-07
rs6795519	3	59363246	T	C	0.123722	6	ZygR-Sbn	4.58248e-07
rs2168809	3	88460436	T	C	0.335226	7	ZygR-Sbn	3.59612e-07
rs9858909	3	88461038	A	G	0.335602	7	ZygR-Sbn	2.89368e-07
rs4552364	3	89057553	T	C	0.480209	8	ZygL-Sbn	1.76824e-07
rs4353811	3	89063897	C	T	0.48058	8	ZygL-Sbn	2.20336e-07
rs13098099	3	185822361	G	A	0.475327	9	PC10	1.91952e-07
rs13097965	3	185822451	C	T	0.47478	9	PC10	2.18181e-07
rs17447439	3	191032117	G	A	0.0426704	10	EyeR-EyeL	4.44298e-08
rs6555969	5	171061069	T	C	0.327827	11	ZygR-Nsn	1.16964e-09
rs2342494	7	4038749	A	G	0.158491	12	PC6	4.72038e-07
rs10237319	7	4040127	T	C	0.162795	12	PC6	1.11806e-07
rs10265937	7	4040175	A	G	0.179792	12	PC6	4.07567e-07
rs10266101	7	4040345	T	G	0.179792	12	PC6	4.07567e-07
rs10237838	7	4040524	T	C	0.179885	12	PC6	4.07804e-07
rs10237488	7	4040868	G	T	0.179885	12	PC6	4.07804e-07
rs10278187	7	4040899	T	C	0.179885	12	PC6	4.07804e-07
rs10234405	7	4040985	G	A	0.179885	12	PC6	4.07804e-07
rs6950754	7	4043649	C	T	0.17664	12	PC6	4.53927e-07
rs6462544	7	4044146	A	G	0.160033	12	PC6	1.74145e-07
rs7803030	7	4044716	A	C	0.177095	12	PC6	4.85241e-07
rs12155314	7	4047720	T	G	0.161729	12	PC6	4.36542e-07
rs9692219	7	4049859	C	T	0.159628	12	PC6	2.55457e-07
rs1562006	7	4050030	T	C	0.157418	12	PC6	4.28531e-07
rs1562005	7	4050349	G	A	0.180632	12	PC6	4.00869e-07
rs7779616	7	4052566	A	G	0.15923	12	PC6	2.12762e-07
rs7799331	7	4052649	G	A	0.175869	12	PC6	4.63809e-07
rs7781059	7	4052845	T	C	0.160681	12	PC6	1.29993e-07
rs7807181	7	4052970	C	T	0.159049	12	PC6	1.94961e-07
rs6462562	7	4055081	G	A	0.158251	12	PC6	3.83847e-07
rs10485860	7	4056809	C	T	0.157552	12	PC6	4.0671e-07
rs2108166	7	42092396	C	T	0.207423	13	AlrR-AlrL	4.51145e-07
rs1158810	9	120849340	C	T	0.490209	14	EyeL-Nsn	3.52596e-07
rs6478394	9	120876495	G	A	0.336273	14	EyeL-Nsn	4.6612e-07
rs805722	10	105800390	T	C	0.186538	15	EyeL-Nsn	3.96956e-08
rs11191909	10	105802991	T	C	0.190818	15	EyeL-Nsn	4.60904e-08
rs1747677	10	105805231	A	C	0.192107	15	EyeL-Nsn	2.41139e-07
rs805693	10	105805314	A	G	0.192029	15	EyeL-Nsn	2.97684e-07
rs805694	10	105805444	G	A	0.192473	15	EyeL-Nsn	2.65833e-07
rs9971100	10	105816409	C	A	0.193524	15	EyeL-Nsn	4.94806e-07
rs2274107	10	105828693	A	G	0.191541	15	EyeL-Nsn	4.20018e-07
rs12358982	10	105844319	G	A	0.191111	15	EyeL-Nsn	4.14762e-07
rs11604811	11	72067632	T	G	0.0601248	16	EyeR-Nsn	1.27217e-07
rs11237982	11	79119342	C	T	0.124669	17	Prn-Sbn	1.78718e-07
rs1939697	11	99596903	T	G	0.227559	18	PC10	3.9694e-07
rs1939707	11	99607308	C	T	0.22906	18	PC10	4.6538e-07
rs10843104	12	28167893	C	T	0.303975	19	EyeL-Nsn	4.43145e-07
rs17252053	12	84252079	A	G	0.185189	20	PC2	1.08842e-07
rs4433629	12	88865586	A	G	0.248226	21	ZygR-EyeR	1.34443e-07
rs7966317	12	99319442	A	G	0.457946	22	EyeR-EyeL	4.35455e-07
rs1887276	12	99321616	A	G	0.458131	22	EyeR-EyeL	3.83981e-07
rs7965082	12	99324324	C	T	0.471399	22	EyeR-EyeL	2.65277e-07
rs12437560	15	59911998	G	T	0.243507	23	ZygL-Sbn	2.89841e-07
rs16977002	17	67426928	C	T	0.28505	24	PC6	4.11032e-07
rs16977008	17	67428075	C	T	0.285236	24	PC6	3.3988e-07
rs16977009	17	67428119	T	C	0.285542	24	PC6	2.99514e-07
rs4793389	17	67429512	A	C	0.285542	24	PC6	2.99514e-07
rs8079498	17	67431047	C	T	0.285635	24	PC6	2.85633e-07
rs7214306	17	67432866	C	T	0.285635	24	PC6	2.85633e-07
rs1019212	19	51421059	G	A	0.505675	25	EyeL-Prn	4.75975e-07
rs1008591	19	51422454	A	G	0.505765	25	EyeL-Prn	4.34091e-07
rs2327101	20	8682263	A	G	0.0304719	26	EyeL-AlrR	2.19751e-07
rs6056066	20	8686169	T	C	0.0308321	26	EyeL-AlrR	2.32898e-07
rs1015092	20	8698062	A	G	0.0304889	26	EyeL-AlrR	2.49636e-07
rs975633	20	8713289	T	C	0.0307335	26	EyeL-AlrR	2.5568e-07
rs6039266	20	8714071	A	G	0.0307335	26	EyeL-AlrR	2.5568e-07
rs2327089	20	8717180	C	T	0.0307392	26	EyeL-AlrR	2.58587e-07
rs4633993	20	8718108	A	C	0.0307392	26	EyeL-AlrR	2.58587e-07
rs4053148	20	8720544	A	G	0.0309135	26	EyeL-AlrR	2.83479e-07
rs6039272	20	8720874	T	C	0.0306521	26	EyeL-AlrR	3.33621e-07
rs6056119	20	8721295	T	C	0.0309135	26	EyeL-AlrR	2.83479e-07
rs6056126	20	8723670	T	C	0.0303087	26	EyeL-AlrR	2.90668e-07
rs911020	20	49105353	T	C	0.0740499	27	ZygL-Prn	3.14238e-07
rs6020940	20	49108256	G	A	0.0736007	27	ZygL-Prn	2.08845e-07
rs6020957	20	49121042	T	C	0.0708844	27	ZygL-Prn	2.78582e-07
rs911015	20	49123578	A	G	0.0707784	27	ZygL-Prn	3.01417e-07
rs2832438	21	30059808	C	T	0.129138	28	Nsn-Prn	3.90592e-07
rs397723	22	46491454	A	G	0.195763	29	ZygR-EyeR	1.36444e-07
Trait, the phenotype for which the minimal P value was obtained
MinP, the minimal P value
P values may be slightly different than the ones reported in the manuscript
