# Supplementary material for: A Genome-Wide Association Study Identifies Five Loci Influencing Facial Morphology in Europeans
Source: PLoS Genet. 2012 Sep 13;8(9):e1002932. doi: 10.1371/journal.pgen.1002932 (PMC3441666; doi:10.1371/journal.pgen.1002932)
Supplement: Table S5 — SNPs (n = 102) associated (P<5e-7) with facial shape phenotypes in discovery phase GWAS. Trait, the phenotype for which the minimal P value was obtained. MinP, the minimal P value. (XLSX) [file pgen.1002932.s006.xlsx]

## Sheet: TS5
Table S5. 102 SNPs associated (P<5e-7) with facial shape phenotypes in discovery phase GWAS
SNP	Chr	BP	Eff	Alt	FreqEff	Loci	Trait	MinP
rs4648477	1	3241835	A	G	0.275663	1	AlrL-Prn	1.28812e-08
rs4648478	1	3241867	T	C	0.275798	1	AlrL-Prn	1.12447e-08
rs7516150	1	3243749	T	C	0.278936	1	AlrL-Prn	2.51995e-08
rs7552331	1	3243801	A	G	0.27812	1	AlrL-Prn	3.96835e-08
rs1572037	1	3244229	C	T	0.278627	1	AlrL-Prn	2.45311e-08
rs1999527	1	3245968	A	C	0.279959	1	AlrL-Prn	1.72417e-08
rs4648379	1	3251376	T	C	0.279876	1	AlrL-Prn	1.1286e-08
rs1005999	2	104890223	T	C	0.240578	2	EyeR-AlrL	1.98148e-07
rs2422239	2	118745549	G	A	0.485552	3	PC8	2.54092e-07
rs2422241	2	118759506	G	A	0.441653	3	PC8	9.22453e-08
rs6749293	2	172875049	C	T	0.103726	4	Nsn-Prn	4.55738e-07
rs16863422	2	222698259	G	A	0.166419	5	EyeR-Nsn	2.06417e-08
rs12694574	2	222701977	C	T	0.166574	5	EyeR-Nsn	2.54719e-08
rs2894450	2	222705348	G	A	0.396158	5	EyeR-Nsn	1.55285e-07
rs974448	2	222713558	G	A	0.166388	5	EyeR-Nsn	1.56492e-08
rs1978859	2	222790575	T	C	0.332466	5	EyeL-Nsn	3.60961e-07
rs2034127	3	59343114	A	G	0.154154	6	Size	8.54087e-08
rs2034128	3	59343299	A	G	0.154025	6	Size	9.54515e-08
rs2034129	3	59343333	C	A	0.154003	6	Size	9.24636e-08
rs7628370	3	59345640	C	A	0.162888	6	Size	2.27165e-07
rs7617069	3	59345735	A	C	0.163819	6	Size	2.4672e-07
rs717463	3	59347740	C	T	0.159576	6	Size	4.73503e-07
rs894883	3	59348295	G	A	0.121305	6	ZygR-Sbn	1.33546e-07
rs7640340	3	59355051	G	A	0.159944	6	Size	3.0663e-07
rs875143	3	59355411	T	C	0.159383	6	Size	4.20994e-07
rs6795519	3	59363246	T	C	0.123722	6	ZygR-Sbn	4.58248e-07
rs2168809	3	88460436	T	C	0.335226	7	ZygR-Sbn	3.59612e-07
rs9858909	3	88461038	A	G	0.335602	7	ZygR-Sbn	2.89368e-07
rs4552364	3	89057553	T	C	0.480209	8	ZygL-Sbn	1.76824e-07
rs4353811	3	89063897	C	T	0.48058	8	ZygL-Sbn	2.20336e-07
rs13098099	3	185822361	G	A	0.475327	9	PC10	1.91952e-07
rs13097965	3	185822451	C	T	0.47478	9	PC10	2.18181e-07
rs17447439	3	191032117	G	A	0.0426704	10	EyeR-EyeL	4.44298e-08
rs6555969	5	171061069	T	C	0.327827	11	ZygR-Nsn	1.16964e-09
rs2342494	7	4038749	A	G	0.158491	12	PC6	4.72038e-07
rs10237319	7	4040127	T	C	0.162795	12	PC6	1.11806e-07
rs10265937	7	4040175	A	G	0.179792	12	PC6	4.07567e-07
rs10266101	7	4040345	T	G	0.179792	12	PC6	4.07567e-07
rs10237838	7	4040524	T	C	0.179885	12	PC6	4.07804e-07
rs10237488	7	4040868	G	T	0.179885	12	PC6	4.07804e-07
rs10278187	7	4040899	T	C	0.179885	12	PC6	4.07804e-07
rs10234405	7	4040985	G	A	0.179885	12	PC6	4.07804e-07
rs6950754	7	4043649	C	T	0.17664	12	PC6	4.53927e-07
rs6462544	7	4044146	A	G	0.160033	12	PC6	1.74145e-07
rs7803030	7	4044716	A	C	0.177095	12	PC6	4.85241e-07
rs12155314	7	4047720	T	G	0.161729	12	PC6	4.36542e-07
rs9692219	7	4049859	C	T	0.159628	12	PC6	2.55457e-07
rs1562006	7	4050030	T	C	0.157418	12	PC6	4.28531e-07
rs1562005	7	4050349	G	A	0.180632	12	PC6	4.00869e-07
rs7779616	7	4052566	A	G	0.15923	12	PC6	2.12762e-07
rs7799331	7	4052649	G	A	0.175869	12	PC6	4.63809e-07
rs7781059	7	4052845	T	C	0.160681	12	PC6	1.29993e-07
rs7807181	7	4052970	C	T	0.159049	12	PC6	1.94961e-07
rs6462562	7	4055081	G	A	0.158251	12	PC6	3.83847e-07
rs10485860	7	4056809	C	T	0.157552	12	PC6	4.0671e-07
rs2108166	7	42092396	C	T	0.207423	13	AlrR-AlrL	4.51145e-07
rs1158810	9	120849340	C	T	0.490209	14	EyeL-Nsn	3.52596e-07
rs6478394	9	120876495	G	A	0.336273	14	EyeL-Nsn	4.6612e-07
rs805722	10	105800390	T	C	0.186538	15	EyeL-Nsn	3.96956e-08
rs11191909	10	105802991	T	C	0.190818	15	EyeL-Nsn	4.60904e-08
rs1747677	10	105805231	A	C	0.192107	15	EyeL-Nsn	2.41139e-07
rs805693	10	105805314	A	G	0.192029	15	EyeL-Nsn	2.97684e-07
rs805694	10	105805444	G	A	0.192473	15	EyeL-Nsn	2.65833e-07
rs9971100	10	105816409	C	A	0.193524	15	EyeL-Nsn	4.94806e-07
rs2274107	10	105828693	A	G	0.191541	15	EyeL-Nsn	4.20018e-07
rs12358982	10	105844319	G	A	0.191111	15	EyeL-Nsn	4.14762e-07
rs11604811	11	72067632	T	G	0.0601248	16	EyeR-Nsn	1.27217e-07
rs11237982	11	79119342	C	T	0.124669	17	Prn-Sbn	1.78718e-07
rs1939697	11	99596903	T	G	0.227559	18	PC10	3.9694e-07
rs1939707	11	99607308	C	T	0.22906	18	PC10	4.6538e-07
rs10843104	12	28167893	C	T	0.303975	19	EyeL-Nsn	4.43145e-07
rs17252053	12	84252079	A	G	0.185189	20	PC2	1.08842e-07
rs4433629	12	88865586	A	G	0.248226	21	ZygR-EyeR	1.34443e-07
rs7966317	12	99319442	A	G	0.457946	22	EyeR-EyeL	4.35455e-07
rs1887276	12	99321616	A	G	0.458131	22	EyeR-EyeL	3.83981e-07
rs7965082	12	99324324	C	T	0.471399	22	EyeR-EyeL	2.65277e-07
rs12437560	15	59911998	G	T	0.243507	23	ZygL-Sbn	2.89841e-07
rs16977002	17	67426928	C	T	0.28505	24	PC6	4.11032e-07
rs16977008	17	67428075	C	T	0.285236	24	PC6	3.3988e-07
rs16977009	17	67428119	T	C	0.285542	24	PC6	2.99514e-07
rs4793389	17	67429512	A	C	0.285542	24	PC6	2.99514e-07
rs8079498	17	67431047	C	T	0.285635	24	PC6	2.85633e-07
rs7214306	17	67432866	C	T	0.285635	24	PC6	2.85633e-07
rs1019212	19	51421059	G	A	0.505675	25	EyeL-Prn	4.75975e-07
rs1008591	19	51422454	A	G	0.505765	25	EyeL-Prn	4.34091e-07
rs2327101	20	8682263	A	G	0.0304719	26	EyeL-AlrR	2.19751e-07
rs6056066	20	8686169	T	C	0.0308321	26	EyeL-AlrR	2.32898e-07
rs1015092	20	8698062	A	G	0.0304889	26	EyeL-AlrR	2.49636e-07
rs975633	20	8713289	T	C	0.0307335	26	EyeL-AlrR	2.5568e-07
rs6039266	20	8714071	A	G	0.0307335	26	EyeL-AlrR	2.5568e-07
rs2327089	20	8717180	C	T	0.0307392	26	EyeL-AlrR	2.58587e-07
rs4633993	20	8718108	A	C	0.0307392	26	EyeL-AlrR	2.58587e-07
rs4053148	20	8720544	A	G	0.0309135	26	EyeL-AlrR	2.83479e-07
rs6039272	20	8720874	T	C	0.0306521	26	EyeL-AlrR	3.33621e-07
rs6056119	20	8721295	T	C	0.0309135	26	EyeL-AlrR	2.83479e-07
rs6056126	20	8723670	T	C	0.0303087	26	EyeL-AlrR	2.90668e-07
rs911020	20	49105353	T	C	0.0740499	27	ZygL-Prn	3.14238e-07
rs6020940	20	49108256	G	A	0.0736007	27	ZygL-Prn	2.08845e-07
rs6020957	20	49121042	T	C	0.0708844	27	ZygL-Prn	2.78582e-07
rs911015	20	49123578	A	G	0.0707784	27	ZygL-Prn	3.01417e-07
rs2832438	21	30059808	C	T	0.129138	28	Nsn-Prn	3.90592e-07
rs397723	22	46491454	A	G	0.195763	29	ZygR-EyeR	1.36444e-07
Trait, the phenotype for which the minimal P value was obtained
MinP, the minimal P value
P values may be slightly different than the ones reported in the manuscript
