# Supplementary material for: A Genome-Wide Association Study Identifies Five Loci Influencing Facial Morphology in Europeans
Source: PLoS Genet. 2012 Sep 13;8(9):e1002932. doi: 10.1371/journal.pgen.1002932 (PMC3441666; doi:10.1371/journal.pgen.1002932)
Supplement: Table S6 — Raw genotype and respective phenotype data for all SNPs that revealed genome-wide significant and suggestive evidence. (XLSX) [file pgen.1002932.s007.xlsx]

## Sheet: Phenotype
id	sex	age	cohort	ZygionRx	ZygionRy	ZygionRz	ZygionLx	ZygionLy	ZygionLz	EyeballRx	EyeballRy	EyeballRz	EyeballLx	EyeballLy	EyeballLz	AlareRx	AlareRy	AlareRz	AlareLx	AlareLy	AlareLz	Nasionx	Nasiony	Nasionz	Pronasalex	Pronasaley	Pronasalez	Subnasalex	Subnasaley	Subnasalez
1	Male	65.18	RS1	150.58	102.73	27.516	22.746	104.28	25.156	115.97	54.443	47.6	49.561	57.861	45.2	104.63	34.295	8.5868	62.556	35.444	7.2913	81.413	30.669	55.169	84.259	9.3137	9.424	84.013	27.196	1.5278
2	Male	69.39	RS1	154.11	91.67	31.169	15.742	101.52	34.894	118.41	52.978	58	51.514	58.35	61.2	102.83	29.56	24.251	64.259	30.236	24.411	83.67	32.668	72.934	88.205	3.8515	32.007	83.732	20.506	16.206
3	Female	80.6	RS1	154.63	108.06	42.458	29.256	103.8	35.932	123.29	68.603	64.4	61.279	71.533	62.8	111.62	44.947	30.011	74.677	44.916	28.876	92.131	47.921	73.504	93.479	24.159	35.868	93.44	36.887	24.441
4	Male	82.16	RS1	157.1	91.958	29.563	15.949	93.448	34.46	120.36	58.35	59.6	55.42	58.838	60.4	107.59	32.836	21.009	64.558	31.128	20.976	88.315	33.23	76.953	87.923	3.3794	31.656	86.734	19.797	13.799
5	Male	60.45	RS1	155.08	112.98	33.654	26.107	101.67	32.29	127.2	64.209	62	64.209	58.35	62.8	118.7	40.107	24.808	75.736	36.383	21.549	95.852	43.955	73.344	98.327	11.326	32.299	97.925	28.639	17.493
6	Female	72.45	RS1	149	105.33	25.692	24.858	92.435	39.905	124.76	62.744	46.8	62.744	56.396	54.8	105.68	40.85	10.041	73.127	37.732	12.703	96.502	36.63	54.893	90.885	15.534	11.634	88.336	32.073	3.6177
7	Male	77.22	RS1	153.23	89.099	42.562	19.412	99.851	33.986	114.5	45.166	59.6	49.561	50.049	54.8	103.83	30.428	20.494	64.178	32.879	16.923	79.98	29.816	66.723	81.445	7.0396	25.647	83.46	23.447	13.36
8	Male	71.22	RS1	155.92	117.8	23.602	28.291	103.55	33.732	133.54	72.998	50	65.674	64.209	54.8	119.9	48.349	15.556	78.215	42.289	17.518	102.99	44.545	63.453	100.97	23.294	21.582	98.669	38.622	10.753
9	Female	78.58	RS1	154.83	100.09	36.014	29.074	99.031	38.157	122.31	66.65	61.2	62.744	66.162	64.4	111.02	38.99	24.644	73.264	38.999	27.043	94.211	45.777	71.732	90.646	20.113	32.677	90.76	32.612	19.881
10	Female	71.95	RS1	154.19	107.14	31.921	32.009	98.645	31.695	129.64	65.674	48.4	66.162	58.838	49.2	118.14	50.885	9.5782	83.022	46.457	9.1463	100.37	39.465	54.707	103.73	29.348	9.6541	102.09	46.019	1.9341
11	Female	80.2	RS1	153.5	121.77	32.393	28.388	112.98	35.057	125.24	72.021	47.6	62.744	66.65	48.4	111.93	56.215	9.8094	74.525	52.442	10.197	96.536	44.677	52.506	96.356	28.839	9.5955	93.987	47.374	4.8114
12	Male	67.81	RS1	156	95.997	40.42	26.275	88.453	41.503	127.2	52.49	63.6	61.768	47.119	66	117.1	31.918	26.446	70.937	28.915	26.861	95.725	27.599	76.884	95.158	5.3455	33.038	94.523	22.153	20.035
13	Male	77.04	RS1	163.39	101.84	46.012	28.334	90.661	44.027	128.66	62.744	73.2	69.092	55.908	72.4	123.96	36.656	38.282	83.469	30.687	37.099	100.18	38.371	85.852	105.56	9.5735	45.429	105.23	26.512	30.947
14	Female	69.12	RS1	147.95	97.817	37.731	30.904	99.253	32.427	115.97	63.232	58	58.838	64.697	56.4	105.73	41.018	22.794	71.775	40.407	23.215	87.898	43.918	65.385	89.927	21.077	27.699	89.244	35.03	14.161
15	Female	79.19	RS1	159.24	110.63	41.521	23.258	98.128	39.374	127.2	66.162	63.6	62.256	60.791	62.8	117.23	41.497	26.078	78.318	37.986	25.539	98.701	39.521	67.249	99.156	18.866	31.029	97.318	32.423	20.197
16	Female	82.56	RS1	158.33	115.12	38.155	35.298	97.011	37.484	130.13	69.092	61.2	72.998	60.303	61.2	122.39	44.937	27.098	87.518	39.432	25.064	104.23	46.795	71.655	108.08	18.999	34.078	105	36.328	21.359
17	Male	74.53	RS1	145.98	107.3	18.395	18.612	110.65	20.639	111.57	62.744	26	50.537	65.186	27.6	97.309	52.726	3.3787	61.1	53.216	2.7283	80.506	38.783	30.869	79.074	30.036	-0.042706	78.697	49.138	2.073
18	Male	68.07	RS1	157.65	113.37	27.516	29.955	100.48	33.53	130.13	69.092	53.2	69.092	65.674	56.4	117.1	48.956	18.627	83.909	44.058	20.538	101.48	47.967	64.417	103.83	24.327	24.475	101.31	40.168	15.084
19	Female	71.08	RS1	157.85	116.7	48.356	31.667	112.44	27.921	127.2	72.021	58	63.232	68.603	49.2	120.19	56.502	12.571	86.944	53.468	6.9574	96.182	45.086	58.674	104.44	31.918	11.322	104.3	49.352	3.9498
20	Female	70.01	RS1	153.69	109.94	34.584	27.186	103.88	31.688	121.83	68.603	55.6	60.791	64.697	54.8	112.27	47.464	13.801	74.832	44.72	12.616	92.767	44.532	62.09	95.533	22.747	16.702	94.318	39.947	6.7165
21	Female	68.18	RS1	154.25	105.39	46.231	26.666	100.48	47.892	123.78	68.603	66.8	60.791	67.139	69.2	111.65	42.964	29.329	73.248	41.21	30.45	94.039	39.604	73.861	93.675	17.559	34.22	93.361	36.338	21.796
22	Female	68.13	RS1	145.99	97.05	26.276	22.91	107.63	26.922	109.13	57.373	36.4	49.561	63.232	37.2	93.435	47.261	5.1808	61.334	50.412	3.7093	77.417	40.472	38.449	72.821	31.47	1.936	76.075	45.01	1.5343
23	Male	71.2	RS1	157.46	103.34	22.569	18.304	103.31	26.27	121.34	59.326	45.2	55.908	58.838	46.8	106.36	35.352	5.7255	66.385	36.272	6.5149	88.175	33.92	53.317	87.602	9.9007	8.3803	85.39	26.478	2.3976
24	Male	76.89	RS1	153.17	101.31	38.823	18.329	89.105	37.689	122.31	56.885	58.8	55.908	51.025	60.4	110.52	35.371	21.533	71.948	30.629	20.841	91.333	31.234	66.296	92.741	7.31	26.888	92.236	26.047	13.453
25	Female	71.92	RS1	151.05	105.33	39.687	28.002	103.93	34.082	117.43	67.627	53.2	59.814	65.186	51.6	108.36	50.667	12.78	71.859	50.145	9.5806	89.42	45.786	58.8	90.067	29.332	13.101	89.645	45.815	3.1566
26	Female	69.21	RS1	152.18	107.74	31.271	30.422	97.61	30.681	126.71	62.256	44.4	62.744	56.885	46	113.46	51.212	6.5313	77.696	48.07	5.675	95.671	36.583	52.69	96.535	24.662	6.1074	96.514	43.073	-1.1261
27	Female	70.07	RS1	156.77	106.14	30.751	29.491	92.867	36.596	131.59	62.256	44.4	66.162	54.443	48.4	117.27	44.739	5.9596	78.946	39.845	6.3015	100.57	34.772	53.767	101.54	17.347	8.9898	98.877	35.481	0.021038
28	Male	71.2	RS1	158.29	101.5	38.54	28.11	96.584	31.188	128.17	56.885	59.6	61.768	54.932	54.8	116.37	35.332	10.865	77.713	34.686	10.263	94.56	28.296	65.082	93.452	7.6382	15.344	96.803	28.135	3.3672
29	Male	83.15	RS1	152.25	94.828	44.564	17.655	99.434	46.457	115.48	61.768	75.6	49.561	63.232	76.4	104.12	31.228	40.636	60.256	31.064	39.507	80.779	41.927	90.128	87.234	9.3619	45.334	82.792	21.98	33.789
30	Female	70.52	RS1	155.69	114.01	26.823	28.227	119.66	28.113	120.36	72.021	38	60.791	72.51	38.8	108.62	64.623	4.6848	72.429	65.398	6.4439	89.98	51.771	43.622	89.126	46.74	6.8262	89.405	61.556	2.7375
31	Male	75.89	RS1	158.98	106.33	36.376	27.438	95.962	36.349	129.64	63.721	67.6	65.674	60.303	66.8	121.68	38.579	32.166	80.761	35.299	29.445	99.478	42.11	79.442	105.36	11.221	38.256	102.54	27.128	24.216
32	Female	85.42	RS1	152.77	129.21	25.068	38.089	111.51	23.516	128.66	87.646	39.6	74.463	80.811	40.4	121.88	69.799	5.0314	89.542	65.056	6.3895	106.71	60.753	40.51	109.63	46.578	4.6793	107.04	59.905	2.8486
33	Male	71.84	RS1	149.91	88.203	27.237	10.427	106.94	29.22	108.15	55.42	61.2	41.748	63.721	62.8	91.065	27.107	19.489	48.061	33.111	20.969	72.881	38.442	76.913	64.414	3.7828	29.096	67.196	22.412	14.038
34	Female	71.26	RS1	152.32	105.85	35.954	25.642	112.28	21.336	114.99	75.439	48.4	54.932	78.369	40.4	105.43	55.896	7.1362	71.162	56.197	5.0348	83.232	52.02	44.977	87.632	36.278	6.9042	88.973	50.762	-0.75652
35	Female	88.6	RS1	155.26	108.31	25.574	27.359	91.759	25.776	131.1	65.186	47.6	63.721	56.885	49.2	119.1	45.449	7.5222	80.434	38.176	6.2244	100.02	40.262	56.501	103.14	19.923	11.73	99.981	36.345	0.99856
36	Female	65.21	RS1	158.81	114.07	30.162	25.929	106.74	20.395	123.78	77.881	46	62.256	71.533	39.6	111.7	53.186	7.1781	79.152	52.256	6.5837	93.586	45.785	46.599	96.2	31.351	6.183	96.178	45.158	4.6814
37	Male	64.13	RS1	159.4	97.891	38.382	21.745	90.422	26.097	122.31	54.932	63.6	57.861	52.002	55.6	117.19	32.17	21.749	75.398	26.363	15.312	90.834	31.679	70.691	101.48	3.4314	25.234	99.259	20.27	11.693
38	Female	87.13	RS1	151.33	117.15	36.108	25.594	113.77	36.169	119.38	74.463	53.2	56.396	73.975	53.2	105.75	56.815	19.51	68.695	55.337	17.904	87.115	54.238	60.127	88.65	30.436	23.317	88.451	49.203	12.509
39	Male	59.67	RS1	157.1	112.48	31.151	15.577	107.91	40.78	122.8	66.65	60.4	55.908	64.697	63.6	106.75	46.235	25.076	65.7	45.448	26.377	90.113	46.562	74.075	85.959	18.915	29.615	85.367	37.538	17.229
40	Female	72.38	RS1	155.55	115.17	33.542	28.584	106.99	26.686	127.2	71.533	50	63.232	67.627	47.6	117.57	55.822	9.24	81.356	52.782	6.9207	96.506	47.28	54.801	101.73	33.137	10.557	100.55	49.243	1.169
41	Male	64.26	RS1	156.21	106.29	31.072	21.681	99.69	40.828	123.78	66.65	55.6	60.791	64.209	60.4	113.26	39.643	20.852	68.032	37.069	23.036	93.885	42.075	70.902	90.859	11.61	31.043	89.171	28.776	15.979
42	Female	71.15	RS1	150.25	109.47	33.63	23.071	105.95	35.605	119.38	70.557	54.8	57.861	68.603	55.6	109.29	48.351	14.888	68.906	47.24	13.542	89.904	45.464	61.586	88.114	21.875	16.546	88.29	40.593	4.9536
43	Female	65.28	RS1	153.96	116.4	35.618	31.601	107.43	34.29	122.8	75.439	60.4	65.186	72.021	61.2	112.17	50.545	27.745	79.75	47.772	28.087	94.732	57.705	69.34	96.567	31.398	35.588	96.163	42.096	23.155
44	Male	76.1	RS1	152.21	100.36	31.264	22.815	93.941	32.183	121.34	58.35	53.2	57.861	54.443	54	110.83	32.669	16.839	69.264	29.443	15.643	91.209	31.262	64.874	91.237	5.7074	21.605	90.084	22.31	10.597
45	Female	76.42	RS1	152.31	113.76	36.257	33.532	104.41	25.445	122.8	73.486	54.8	67.139	68.603	50.8	117.2	48.153	14.39	83.556	45.598	11.542	96.958	49.504	62.756	101.84	21.591	19.19	101.38	37.431	6.5347
46	Male	75.42	RS1	156.03	92.179	37.113	27.279	97.577	28.566	118.41	53.955	58	55.908	57.373	53.2	107.75	33.583	15.716	68.094	35.513	15.655	86.581	35.849	61.167	85.994	11.353	17.653	87.405	26.488	8.3998
47	Male	79.66	RS1	154.23	99.575	47.762	21.402	109.39	39.453	113.04	61.768	71.6	51.514	67.139	66.8	102.45	34.787	34.615	62.708	37.408	31.069	80.101	44.78	81.295	82.558	9.8507	43.261	82.099	25.204	26.494
48	Male	69.93	RS1	166.04	101.85	31.158	31.235	107.01	18.422	130.13	59.326	40.4	65.186	60.303	34.8	119.32	41.458	5.5138	79.66	42.382	5.1685	95.431	31.827	43.049	97.476	13.272	8.4602	98.433	35.232	1.5145
49	Female	80.9	RS1	144.14	100.17	26.036	17.534	117.82	35.357	106.2	60.303	45.2	43.701	69.092	50	84.6	45.781	5.6143	49.481	51.428	7.2237	72.478	41.534	52.322	62.894	23.279	7.0443	64.341	42.299	-0.0198
50	Male	76.49	RS1	159.53	97.353	24.963	25.888	99.318	27.976	127.69	47.607	46	59.814	48.584	50	114.94	27.153	7.1941	70.618	27.107	7.4662	95.624	27.435	57.13	92.5	0.91502	11.571	91.841	18.017	-0.81923
51	Male	90.64	RS1	158.47	95.901	35.384	26.024	93.939	37.106	126.71	55.42	63.6	63.721	54.443	62.8	108.81	31.354	24.246	74.647	32.7	23.536	95.781	31.599	75.99	91.338	8.5153	31.71	90.112	24.858	17.543
52	Male	68.5	RS1	155.88	102.93	39.268	23.937	99.734	38.396	124.27	60.303	66	59.326	60.791	66	112.97	37.464	25.327	71.821	34.053	25.145	92.97	34.801	75.165	94.589	8.4482	31.232	93.046	27.695	17.691
53	Female	72.3	RS1	144.19	105.02	21.684	24.818	108.33	27.386	113.04	65.674	27.6	53.955	68.115	31.6	99.212	56.813	1.9924	62.906	59.077	4.147	84.009	48.052	30.853	80.499	41.943	-0.19425	80.47	54.997	0.87829
54	Female	66.05	RS1	144.45	87.413	33.156	26.728	99.864	25.528	109.13	49.561	54.8	48.584	53.467	53.2	94.327	27.768	12.526	59.297	32.149	11.618	76.673	29.599	62.454	72.351	6.1852	18.394	74.998	23.722	6.7263
55	Female	72.64	RS1	151.05	109.23	40.913	22.328	94.473	34.737	117.92	70.068	60.4	61.279	64.209	58.8	112.62	40.227	27.026	76.395	33.957	24.736	90.701	46.902	69.564	98.379	14.56	36.301	96.078	26.17	20.723
56	Female	68.21	RS1	152.91	109.74	25.778	30.528	100.51	31.012	126.22	70.068	47.6	65.186	66.162	52.4	113.89	47.535	9.5861	78.625	43.996	10.925	97.92	45.074	57.526	98.268	21.386	16.659	95.844	38.181	5.4904
57	Female	68.7	RS1	142.56	124.92	19.19	24.806	125.78	20.42	109.62	82.764	22	56.396	82.764	22	98.368	79.113	-1.9324	67.398	79.61	-2.943	82.79	57.945	19.928	83.942	55.525	-6.8091	81.266	77.07	0.92999
58	Female	87.13	RS1	150.92	82.404	46.954	25.176	89.037	50.473	117.92	49.072	76.4	56.396	53.955	78.8	102.82	22.096	41.5	64.113	23.947	43.407	87.075	31.054	91.459	85.059	3.0641	55.292	83.303	14.793	36.057
59	Male	57.62	RS1	150.62	94.666	28.246	19.141	96.369	33.384	117.43	59.814	54	51.025	61.279	57.2	100.8	34.447	18.569	64.861	34.164	19.987	85.576	33.576	68.74	83.133	6.1666	24.34	82.361	24.192	11.726
60	Female	74.04	RS1	151.12	110.13	25.311	31.89	97.561	27.662	127.2	61.768	40.4	65.674	55.42	42	113.38	50.023	6.6247	80.32	45.791	5.6431	99.15	39.368	45.364	100.4	27.685	6.532	97.859	41.899	2.3405
61	Female	85.3	RS1	150.36	112.81	32.123	29.038	106.32	23.161	120.36	73.975	54	56.396	69.092	49.2	110.47	51.557	10.814	75.912	49.776	9.138	89.627	45.278	56.493	92.847	27.845	10.788	93.188	45.273	3.3556
62	Female	78.25	RS1	158.93	108.91	26.955	27.888	100.05	22.178	128.66	61.768	44.4	62.744	58.838	42.8	116.65	46.506	5.8502	79.357	44.166	4.6152	96.821	39.819	46.875	100.38	27.079	5.6682	98.993	40.964	0.77393
63	Male	62.05	RS1	165.48	108.91	37.742	35.213	88.026	24.312	136.47	65.674	54	74.463	56.885	46.8	135.17	42.654	13.292	91.834	34.476	8.0171	108	37.012	59.894	115.85	12.912	13.715	114.29	30.304	4.3504
64	Male	75.02	RS1	156.24	95.905	45.764	29.46	85.268	45.386	124.76	57.373	74	62.744	54.443	74	115.51	29.35	38.25	74.641	26.63	38.794	94.071	35.102	86.46	95.5	4.9862	44.199	95.823	20.051	31.369
65	Female	79.9	RS1	164.43	107.35	36.928	32.886	100.38	38.169	136.47	68.115	63.6	71.533	63.721	64.4	123.3	42.712	26.767	87.522	39.788	28.473	106.16	43.537	72.109	107.37	17.903	33.555	105.01	36.32	20.047
66	Female	77.13	RS1	157.07	94.107	36.947	25.627	97.517	35.873	121.83	55.42	61.2	58.35	58.838	59.6	106.33	31.66	25.074	70.756	31.726	24.02	88.528	37.642	69.727	88.129	9.7479	32.457	88.287	26.1	19.849
67	Male	72.82	RS1	162.95	104.75	25.987	18.202	96.652	32.335	128.17	52.978	51.6	57.861	52.49	54.8	115.13	32.071	9.5496	70.465	32.169	12.312	94.306	28.54	63.52	91.877	5.5485	18.35	92.14	24.265	4.1207
68	Female	73.64	RS1	154.6	98.347	33.398	30.508	99.662	33.653	124.27	59.814	49.2	63.721	59.326	49.2	113.27	40.186	10.493	77.033	37.525	9.0894	94.781	36.603	56.463	97.136	15.533	12.773	95.796	31.766	2.612
69	Female	76.27	RS1	150.37	107.66	44.735	31.592	111.82	30.173	123.29	67.627	58.8	55.908	66.162	50.8	109.13	46.177	19.165	73.501	46.775	16.974	87.012	41.564	62.94	90.636	23.557	19.256	90.996	40.716	11.692
70	Female	74.88	RS1	153.29	109.02	41.319	28.656	103.21	43.723	122.8	74.951	68.4	63.721	71.533	70	112.8	45.684	36.556	76.319	42.567	34.807	94.072	51.586	78.337	97.913	24.222	44.972	95.325	36.962	32.539
71	Female	69.68	RS1	141.2	101.33	20.567	19.215	106.45	24.746	107.18	63.721	33.2	48.584	65.186	36.4	95.428	49.911	3.651	54.791	51.804	3.9435	76.901	39.738	34.84	74.671	32.132	2.4526	74.181	46.195	0.65645
72	Female	70.91	RS1	157.99	101.66	45.862	28.978	94.384	37.296	124.76	62.744	69.2	61.768	59.814	65.2	116.2	40.898	26.993	82.625	37.513	24.023	93.93	39.967	77.188	102.24	15.935	31.615	100.41	33.704	19.467
73	Female	63.72	RS1	136.69	86.081	29.5	8.3994	106.8	41.896	101.32	62.744	63.6	38.818	71.045	69.2	78.531	33.58	31.996	40.804	40.981	36.883	67.194	43.134	78.794	56.437	16.28	42.881	57.292	28.966	29.6
74	Female	87.32	RS1	159.95	102.63	41.906	24.981	100.09	22.314	123.29	63.232	63.6	55.908	62.256	54.8	114.46	41.398	27.129	75.156	39.927	19.143	88.392	40.421	66.906	96.325	19.757	27.777	96.497	34.73	16.591
75	Female	86.6	RS1	156.89	101.15	40.886	31.428	83.599	44.012	130.13	71.045	70.8	68.115	63.232	74	123.35	42.24	40.774	81.745	35.565	41.386	102.96	45.3	82.12	107.39	16.792	47.888	103.66	31.19	35.319
76	Male	70.7	RS1	153.7	95.778	32.109	19.556	103.83	24.851	112.55	62.256	46	52.49	65.674	42.8	98.739	43.967	5.6443	68.597	44.762	5.0746	81.369	37.922	48.966	83.695	21.06	6.8928	83.672	38.006	-0.63008
77	Female	68.77	RS1	149.94	114.54	27.217	23.057	105.7	26.492	122.31	71.533	38.8	57.861	65.674	39.6	110.96	51.948	8.5469	71.284	47.978	9.0435	91.622	47.022	48.061	91.641	26.369	13.996	91.427	42.396	3.1085
78	Female	71.26	RS1	155.81	114.12	37.413	30.71	103.19	35.678	126.71	70.068	61.2	66.65	64.209	58.8	117.36	47.923	26.604	83.526	44.176	24.182	99.316	42.199	70.474	104.26	20.908	33.037	102.29	38.795	21.134
79	Male	79.52	RS1	158.83	103.34	31.038	29.518	105.56	33.007	124.27	66.65	51.6	62.744	71.045	52.4	108.7	44.925	13.711	72.093	46.44	12.958	91.78	42.343	63.681	89.816	18.731	19.016	89.197	37.862	6.5118
80	Female	63.53	RS1	155.48	103.02	40.631	32.303	95.263	38.077	124.76	70.557	66	66.162	65.674	64.4	116.01	41.335	34.617	80.471	37.349	33.052	97.732	41.312	74.446	99.057	15.721	39.635	98.609	33.128	26.851
81	Male	75.58	RS1	161.28	94.761	42.569	26.216	87.93	37.756	122.8	65.186	75.6	62.744	62.256	73.2	116.48	32.696	47.439	74.112	30.666	44.677	93.364	45.81	89.718	94.7	7.2849	55.46	95.195	22.64	40.637
82	Male	71.93	RS1	159.19	110.12	35.505	22.029	96.168	39.922	125.24	69.58	59.6	63.721	62.744	62	116.36	44.879	22.206	76.658	39.763	22.84	98	45.697	70.421	99.617	19.973	29.928	98.535	34.92	16.77
83	Male	71.1	RS1	159	99.509	34.028	26.701	108.41	25.793	122.8	65.186	53.2	59.326	68.603	49.2	112.28	45.378	16.08	70.952	47.699	13.777	89.695	46.449	58.991	91.556	21.458	20.005	91.498	38.603	7.9466
84	Female	75.92	RS1	154.27	110.99	45.016	28.06	117.89	29.107	116.46	73.975	63.6	53.955	77.881	55.6	106.01	50.24	28.304	68.369	52.846	23.402	82.134	53.31	67.928	85.461	31.477	29.919	87.064	45.459	19.427
85	Female	70.69	RS1	146.21	101.88	44.858	24.987	112.25	33.492	111.08	71.045	56.4	52.49	74.951	51.6	103.34	49.974	17.716	65.33	50.238	15.732	81.659	49.193	60.16	85.47	27.504	20.242	85.794	43.361	9.0214
86	Female	75.8	RS1	155.38	122.47	16.456	29.677	104.33	13.193	128.17	75.928	22	69.092	66.162	21.2	115.99	69.163	0.78747	82.169	63.552	0.37889	101.72	46.025	23.153	101.49	43.481	-3.8778	98.513	63.767	1.9771
87	Male	90.4	RS1	160.24	106.45	40.584	25.486	104.24	36.752	125.24	65.674	65.2	62.256	65.186	65.2	114.13	44.771	22.527	75.349	44.18	22.179	93.721	40.306	74.461	93.823	20.009	26.502	94.455	39.41	14.373
88	Female	67.68	RS1	147.57	101.67	45.639	30.707	96.542	41.623	117.92	67.627	66.8	58.35	63.721	65.2	108.94	38.371	33.63	71.622	35.479	31.132	89.275	41.582	77.439	91.496	16.513	39.416	91.062	28.644	26.599
89	Male	67.47	RS1	154.14	102.82	30.899	21.541	112.32	30.646	119.87	58.35	42.8	52.002	62.256	42.8	101.78	45.499	6.5685	64.12	49.134	4.944	83.139	33.639	45.341	77.706	20.594	7.9639	80.307	41.464	2.4211
90	Female	72.45	RS1	148.99	96.592	38.929	31.059	108.62	25.61	114.99	60.303	58	52.978	65.674	50	102.6	41.112	13.13	71.171	44.307	11.077	82.048	34.607	56.574	85.236	19.815	13.051	87.146	36.313	6.6573
91	Female	71.52	RS1	152.15	97.7	53.184	21.581	96.118	53.422	117.43	68.603	88.4	54.932	66.65	89.2	108.13	34.435	57.155	67.402	33.878	57.694	86.617	48.035	102.31	89.162	11.964	67.564	88.239	25.025	53.107
92	Male	84.02	RS1	155.66	110.24	52.188	26.209	88.501	58.031	131.1	74.951	87.6	67.627	61.768	90	123.57	39.159	51.11	80.212	28.778	52.284	102.94	49.939	101.74	105.77	12.085	65.609	102.97	27.387	52.665
93	Female	61.09	RS1	153.63	106.31	20.717	22.962	94.026	35.622	125.73	64.209	43.6	62.256	57.861	51.6	111.12	40.61	6.8012	73.218	36.096	11.286	97.705	37.012	54.733	95.38	13.118	12.037	91.842	29.939	2.355
94	Female	73.25	RS1	148.28	114.91	27.811	26.4	103.45	32.233	120.85	73.975	50	59.814	69.58	53.2	112.66	52.983	14.318	74.133	48.269	14.909	93.539	51.608	58.997	95.518	28.456	21.856	94.459	43.323	9.6867
95	Female	70.75	RS1	144.98	99.497	27.632	21.857	114.96	25.634	109.62	63.232	42.8	46.631	70.068	42	92.825	46.633	7.0802	54.93	51.233	7.3229	74.712	44.468	47.457	70.48	27.571	7.3142	72.468	43.186	1.2783
96	Female	67.06	RS1	144.5	117.69	30.035	26.016	120.76	33.527	114.01	78.857	41.2	53.467	79.834	42.8	97.871	60.484	6.8719	66.326	62.635	6.7188	84.066	54.276	43.223	80.945	41.424	7.1209	82.191	56.408	2.2462
97	Male	61.03	RS1	162.94	103.9	43.123	25.405	93.762	29.432	129.64	56.396	72.4	62.744	49.561	63.6	123.19	32.637	29.926	77.968	27.377	26.313	94.529	36.786	81.883	98.003	5.2369	35.513	101.61	21.188	19.505
98	Male	70.85	RS1	153.28	94.428	37.147	20.327	102.51	26.274	113.53	51.514	51.6	49.072	56.885	45.2	106.52	35.979	10.511	63.126	39.156	7.7082	78.827	30.257	56.787	81.573	8.5964	11.622	84.149	29.381	1.8984
99	Female	79.4	RS1	150.14	102.67	36.5	24.875	108.54	34.329	114.99	66.162	45.2	56.396	70.068	43.6	100.77	54.928	6.0173	69.319	56.621	5.6874	83.751	46.529	45.681	84.907	33.732	6.8603	85.496	48.822	4.897
100	Female	70.26	RS1	150.69	115.97	28.914	21.351	113.38	39.82	117.92	74.463	51.6	56.396	72.998	57.2	100.43	53.34	16.204	66.932	53.099	17.091	87.342	50.048	60.436	83.129	28.895	22.324	82.478	47.033	11.305
101	Female	84.76	RS1	152.8	109.91	28.044	32.229	97.42	28.931	128.17	65.674	42	66.65	59.326	43.6	116.32	49.991	5.8792	80.4	45.692	6.2384	99.808	41.857	47.626	100.51	24.637	7.0951	99.051	42.015	-0.026769
102	Male	72.13	RS1	156	129.1	30.668	30.839	108.16	29.443	130.62	83.252	48.4	69.092	72.51	49.2	122.23	60.759	11.294	87.64	54.647	12.406	104.1	50.873	55.669	109.33	37.325	17.974	106.78	52.705	7.9024
103	Female	77.64	RS1	155.72	115.25	47.172	28.68	95.658	38.672	129.15	69.58	66	63.232	60.791	61.2	121.54	48.168	30.83	81.935	42.162	27.356	98.407	44.832	70.863	105.24	24.173	34.952	103.42	37.853	23.305
104	Female	78.48	RS1	153.08	108.8	40.469	28.618	107.38	26.532	118.9	72.998	59.6	58.35	72.998	52.4	109.94	51.025	20.549	75.842	50.995	17.066	88.16	48.929	63.938	92.458	27.752	24.092	92.749	46.227	13.412
105	Male	75.84	RS1	155.22	108.3	22.812	18.549	111.4	26.002	118.41	66.162	40.4	55.42	68.115	42.8	106.35	42.741	8.6886	66.661	43.432	8.548	87.455	40.873	49.041	89.838	13.981	12.801	88.862	34.191	4.9155
106	Female	65.81	RS1	150.82	112.9	40.582	30.42	109.1	32.906	120.85	70.557	57.2	59.326	69.58	51.6	109.6	51.319	16.113	74.905	52.702	13.982	90.471	47.996	60.492	91.871	27.025	19.426	93.922	44.824	7.7472
107	Female	77.01	RS1	165.72	102.32	36.412	36.005	88.53	25.992	134.52	61.768	62	69.58	56.396	54.8	126.87	29.894	25.621	89.985	24.678	23.738	104.06	31.133	64.269	111.64	6.1428	31.761	110.53	20.932	18.777
108	Male	92.86	RS1	155.57	111.79	37.333	19.14	103.12	41.1	123.29	68.603	62.8	52.978	67.627	64.4	109.05	49.968	22.746	68.948	48.011	22.996	89.73	43.755	76.779	89.85	22.651	27.493	89.504	42.56	15.272
109	Male	77.58	RS1	155.44	104.27	39.291	20.891	109.19	26.357	117.92	64.697	62	52.49	66.65	54	107.66	43.529	21.187	68.395	44.234	17.734	83.406	38.911	68.985	87.715	14.564	25.276	89.279	34.86	12.551
110	Female	67.67	RS1	151.66	111.74	39.005	27.967	98.384	43.488	123.78	69.092	62.8	65.674	62.256	64.4	111.85	44.368	28.589	78.86	40.248	28.392	96.305	46.573	72.848	97.494	21.13	33.097	94.964	34.311	22.164
111	Male	78.13	RS1	153.94	94.495	47.71	24.965	101.58	31.423	115.48	56.885	68.4	52.49	59.326	61.2	107.49	39.296	29.338	68.425	34.427	23.203	81.754	37.064	76.106	86.757	6.3021	33.737	88.644	28.056	20.71
112	Male	78.11	RS1	159.91	95.146	28.887	26.995	88.044	33.047	125.24	55.42	50.8	64.209	51.514	54	114.12	33.406	10.141	72.465	31.124	10.694	96.727	29.135	62.471	93.468	1.68	14.36	92.759	23.287	3.087
113	Male	72.77	RS1	154.64	106.95	23.495	23.434	100.08	33.739	124.76	52.49	42	57.861	51.025	47.6	106.33	38.675	6.3807	72.132	35.988	6.6451	93.691	27.567	50.306	93.136	10.924	5.9626	90.575	30.103	0.7089
114	Male	71.64	RS1	161.27	106.5	26.863	11.357	91.204	38.11	127.2	68.115	58	58.35	60.791	63.6	114.24	46.154	13.415	71.95	39.604	16.029	95.322	40.235	70.162	96.93	14.812	20.014	94.182	34.501	8.9517
115	Male	81.37	RS1	156.18	103.38	28.27	17.382	106.88	40.984	119.87	63.232	53.2	54.932	66.162	59.6	101.79	40.621	16.975	62.648	42.199	19.916	87.541	39.67	69.563	84.071	12.32	24.042	81.296	32.731	9.4891
116	Female	70.8	RS1	150.08	103.13	42.669	27.011	99.708	46.671	118.9	65.674	66	58.838	64.209	68.4	104.69	40.181	29.952	71.008	39.926	30.209	89.026	44.952	74.995	88.248	17.086	36.928	87.487	32.298	22.842
117	Female	75.13	RS1	155.34	109.73	29.078	25.644	104.49	31.189	123.78	67.139	50	62.744	65.674	51.6	111.47	42.72	11.811	72.784	41.466	12.159	93.439	41.859	58.788	92.948	15.028	19.357	92.453	33.35	6.5925
118	Male	70.5	RS1	155.11	97.566	39.08	23.952	99.256	31.74	116.94	56.885	55.6	58.838	60.791	53.2	111.06	34.639	14.947	72.547	34.22	13.064	86.82	31.8	60.871	91.869	7.1249	20.654	93.407	26.089	6.3885
119	Female	84.28	RS1	154.28	110.7	30.008	32.29	96.495	30.658	127.2	71.533	50	69.092	64.697	50.8	117.61	53.694	9.7599	81.343	48.59	8.8516	98.976	47.946	58.677	102.35	28.98	13.629	99.812	44.467	3.0779
120	Male	83.25	RS1	155.49	104.5	42.357	20.623	103.97	48.683	122.31	66.162	70.8	56.396	67.627	74	112.09	39.092	32.576	65.662	38.174	34.257	89.594	40.97	84.688	91.447	9.418	40.924	89.298	29.074	25.552
121	Male	76.82	RS1	165.78	111.11	30.216	33.516	91.324	26.603	136.47	62.744	50.8	72.021	52.002	49.2	129.34	42.328	12.447	88.602	35.047	11.559	107.51	35.787	59.727	110.41	11.511	17.021	110.14	31.321	5.254
122	Male	74.51	RS1	155.81	99.155	23.167	15.84	103.63	21.519	116.94	52.49	44.4	51.514	52.978	42	103.6	30.381	6.8278	61.873	31.97	7.3473	84.146	29.863	50.208	81.559	5.82	10.74	81.605	23.973	2.7783
123	Male	67.39	RS1	153.86	91.831	26.793	18.787	108.13	27.235	112.55	52.978	43.6	49.072	60.303	45.2	95.366	35.38	4.9012	58.408	41.604	5.0643	76.96	33.945	50.72	72.624	10.264	8.5495	75.191	30.85	-1.6408
124	Female	71.34	RS1	150.04	93.748	45.783	24.538	95.825	40.122	114.5	60.303	69.2	56.396	61.768	66.8	102.79	31.827	29.552	69.418	31.133	26.694	85.057	34.648	77.795	86.052	8.2112	36.697	85.177	22.845	23.087
125	Male	68.31	RS1	144.94	102.5	29.283	21.093	116.15	31.542	111.08	64.697	57.2	48.584	72.021	58.8	94.153	42.229	20.659	56.342	45.358	22.888	78.359	46.945	69.396	75.549	16.358	27.939	75.664	33.151	14.227
126	Female	69.34	RS1	148.44	101.83	34.358	26.834	95.996	37.803	120.36	60.303	57.2	61.768	57.373	58.8	107.91	39.349	16.325	73.392	37.098	17.883	92.311	33.595	65.46	92.914	14.125	21.366	91.581	31.121	11.994
127	Female	70.92	RS1	147.84	101.67	16.459	21.505	100.42	28.423	117.43	63.232	39.6	59.814	60.791	46.8	101.97	44.949	3.5556	67.583	41.936	6.5518	88.926	38.438	45.564	85.758	26.473	6.5318	84.372	39.559	-0.5431
128	Female	67.13	RS1	150.03	107.98	24.258	20.558	110.9	22.975	117.43	65.186	36.4	49.072	67.139	34.8	102.88	55.45	4.2753	63.944	56.097	4.09	82.719	42.745	37.632	84.295	36.621	3.7239	84.798	52.836	1.6458
129	Female	77.62	RS1	154.57	99.542	36.102	29.249	100.41	30.595	121.83	62.744	59.6	58.35	64.209	55.6	108.43	41.289	24.283	71.35	41.931	21.601	89.057	43.656	66.86	90.287	16.762	29.659	90.488	31.726	16.695
130	Female	78.04	RS1	153.71	111.29	42.038	27.928	106.04	43.546	121.34	77.881	56.4	63.232	71.533	55.6	110.15	57.311	17.823	75.402	54.706	18.021	93.105	53.961	60.27	94.993	33.518	22.423	93.839	49.658	11.088
131	Male	71.93	RS1	149.87	101.3	24.686	20.814	116.68	21.127	111.08	61.768	32.4	47.607	70.068	30	98.722	50.683	3.0008	57.739	55.281	2.0006	75.586	43.537	34.375	76.271	34.731	-0.38467	77.693	48.209	-0.84002
132	Male	69.98	RS1	156.02	110.93	28.752	21.76	105.55	36.246	124.27	62.256	50.8	60.791	60.791	56.4	114.71	42.059	12.575	67.459	40.167	15.047	93.874	36.413	65.145	93.691	8.2055	20.659	91.071	30.979	6.9765
133	Male	72.15	RS1	164.21	106.97	38.558	22.164	102.57	33.563	132.57	61.768	66	57.861	62.256	62	114.57	36.368	27.996	74.948	36.657	26.533	94.237	40.686	78.766	90.918	9.8609	33.82	93.467	27.277	20.692
134	Female	83.33	RS1	152.28	108.58	27.135	24.696	98.999	31.928	124.27	65.674	40.4	59.326	61.768	45.2	107.87	42.65	5.2621	72.255	40.325	5.028	92.518	40.243	47.39	90.95	16.752	8.3848	89.97	33.058	-0.50281
135	Male	68.2	RS1	161.98	104.4	24.196	21.109	103.32	27.569	123.78	62.256	46.8	60.791	61.768	48.4	110.4	34.282	11.876	72.043	34.145	12.548	93.649	34.573	55.866	90.661	5.5072	18.04	91.279	24.097	7.1912
136	Female	68.51	RS1	144.86	109.98	28.607	24.506	111.33	35.549	114.01	69.58	46	53.955	70.557	50.8	96.717	47.583	5.9443	61.118	47.407	7.5742	83.229	45.306	53.191	81.061	22.099	11.422	78.652	39.948	1.648
137	Female	72.58	RS1	157.2	109.62	39.441	33.827	97.167	43.322	130.62	72.998	66	71.045	65.186	68.4	121.99	44.259	32.742	84.364	39.224	32.666	102.93	46.281	76.966	105.25	16.5	36.156	103.11	33.383	22.535
138	Male	68.83	RS1	155.51	107.3	31.481	27.223	94.751	28.869	125.73	68.603	55.6	63.232	62.256	54.8	117.61	47.231	22.6	78.188	42.325	20.652	96.751	42.126	65.919	100.39	20.662	23.025	98.22	38.423	13.736
139	Female	60.66	RS1	149.75	90.557	32.833	22.337	89.146	29.57	115.48	53.467	50.8	54.443	52.49	49.2	104.01	32.756	10.165	65.965	32.699	10.02	85.329	31.257	54.881	85.048	8.6614	15.419	84.292	25.937	4.129
140	Female	72.93	RS1	151.22	98.053	31.261	25.295	101.15	31.149	120.85	59.814	41.2	56.885	60.791	42.8	104.08	41.376	5.0933	71.505	41.517	5.3011	88.937	35.223	46.004	87.695	16.681	8.5911	88.499	34.856	0.096848
141	Male	85.1	RS1	163.91	108.06	36.256	27.791	98.34	26.698	125.24	65.674	59.6	67.627	62.744	54	120.2	40.257	25.024	84.715	36.228	21.366	96.716	37.817	68.131	105.49	13.926	30.011	104.33	29.606	17.765
142	Female	78	RS1	146.33	109.03	36.694	24.05	110.18	39.07	114.99	71.045	63.6	56.885	71.045	64.4	101.71	50.21	25.491	68.154	50.998	25.112	85.877	49.681	70.576	84.913	30.387	28.434	85.483	45.38	17.722
143	Female	69.58	RS1	145.2	109.42	41.601	25.598	118.75	44.031	113.04	72.998	60.4	51.514	76.416	62	98.271	56.074	23.827	59.765	58.388	23.867	81.596	54.224	70.876	76.289	34.015	25.817	77.659	50.656	16.423
144	Male	70.87	RS1	156.64	109.9	34.059	22.049	106.46	23.726	119.38	68.603	54.8	55.42	66.162	49.2	109.3	44.759	8.5446	73.931	42.923	6.0879	87.001	40.126	59.16	93.088	16.687	11.168	93.702	35.938	0.50837
145	Female	77.64	RS1	149.57	108.14	26.533	28.356	102.64	30.496	122.31	67.627	49.2	62.744	64.209	51.6	108.11	50.318	12.176	75.364	48.161	13.355	93.267	46.602	59.113	93.006	25.741	17.802	91.347	41.911	7.3536
146	Female	68.91	RS1	150.66	120.29	25.736	24.23	107.26	19.33	122.31	75.439	37.2	59.326	68.603	34.8	112.35	55.623	5.4156	77.106	52.076	4.7127	94.138	45.912	40.244	98.607	30.773	5.5661	97.459	46.44	2.8262
147	Female	78.35	RS1	150.64	104.48	33.164	29.229	105.41	34.979	120.36	64.209	54	58.35	66.162	53.2	107.76	46.454	7.5539	68.809	46.389	8.1472	88.977	38.415	62.516	88.164	16.038	12.578	87.418	37.755	0.60927
148	Male	67.45	RS1	159.45	100.63	45.919	16.221	107.32	46.139	119.87	60.791	72.4	52.002	62.744	73.2	106.25	31.587	39.601	63.36	32.748	37.54	85.173	37.42	85.813	86.25	4.4725	45.406	84.478	21.342	30.874
149	Female	82.38	RS1	141.94	89.887	38.528	18.751	99.282	51.292	109.62	55.908	69.2	48.096	60.303	75.6	87.832	29.966	37.844	55.444	33.461	41.773	77.663	37.418	82.577	69.937	11.463	48.618	69.534	24.53	35.728
150	Female	86.09	RS1	159.37	110.46	39.955	24.469	98.238	39.962	128.17	75.439	72.4	63.721	70.068	73.2	118.04	42.03	36.431	82.865	38.35	35.251	98.81	47.707	83.538	105.86	19.84	45.122	102.25	33.02	29.864
151	Female	60.18	RS1	150.9	95.118	42.329	23.454	104.18	34.584	114.5	58.35	66	51.514	63.232	62	99.407	40.737	30.377	66.167	42.841	29.598	81.719	40.31	74.839	82.425	20.978	34.329	82.679	34.928	23.259
152	Male	78.07	RS1	159.94	115.43	19.358	26.19	94.524	18.883	133.54	60.303	26	70.557	49.561	25.2	120.92	48.556	7.7747	86.183	43.181	7.7754	105.28	31.017	34.364	106.59	26.76	5.2566	103.79	42.571	4.9524
153	Male	79.97	RS1	160.82	93.441	47.961	27.302	90.536	42.356	124.27	52.002	79.6	61.279	51.025	77.2	115.28	27.38	48.831	72.074	27.415	48.124	92.431	35.444	92.373	91.261	4.4349	55.638	93.591	19.37	42.842
154	Female	68.25	RS1	160.88	117.48	36.646	45.339	107.67	21.45	133.54	72.021	50.8	74.463	67.627	42	125.47	55.034	7.9676	92.689	52.761	5.5726	104.89	44.752	52.59	109.94	30.191	7.4502	109.42	48.261	0.91878
155	Male	71.73	RS1	151.81	110.1	33.497	22.348	109.8	40.799	119.87	66.65	60.4	56.885	65.674	66	105.25	43.046	24.098	65.807	43.489	28.145	89.045	48.348	71.808	85.336	19.46	30.889	84.151	34.393	18.15
156	Male	68.96	RS1	153.04	106.06	44.812	18.806	100.55	41.422	114.99	64.209	68.4	52.002	64.209	65.2	104.64	41.854	28.676	66.14	42.339	24.571	82.68	40.067	71.631	84.645	17.726	30.531	85.568	33.136	19.656
157	Female	78.47	RS1	159.82	95.673	32.777	27.381	81.965	29.832	131.59	50.537	54	65.186	44.189	51.6	122.45	27.06	18.33	83.29	23.035	16.025	100.79	27.591	63.648	103.2	5.5745	24.677	103.14	20.182	11.596
158	Male	69.74	RS1	149.9	98.933	24.723	16.191	101.75	29.634	114.5	52.002	38.8	48.584	53.955	42	97.236	36.987	5.1843	62.348	38.582	5.7185	81.39	25.95	44.903	78.175	13.012	6.9803	79.285	30.808	3.2351
159	Female	68.02	RS1	152.11	120.97	35.825	28.146	121.53	29.593	120.36	81.299	40.4	57.373	81.787	38	111.5	67.201	3.5263	69.839	67.279	3.9323	88.107	52.735	38.396	91.039	47.253	2.5428	91.954	63.606	1.0528
160	Female	80.47	RS1	158.18	119.26	39.326	26.092	117.67	39.054	122.31	73.486	50	59.814	72.51	50.8	108.12	63.133	12.312	73.124	62.177	12.895	91.197	49.65	53.606	89.946	40.294	11.644	90.329	57.688	6.1134
161	Female	71.01	RS1	153.13	92.124	38.028	29.57	89.347	23.886	122.31	55.908	53.2	59.326	53.955	46.8	112	35.223	12.327	78.554	34.024	10.782	91.568	32.401	55.622	94.435	10.819	15.777	95.434	27.515	4.9386
162	Male	82.14	RS1	146.86	103.22	22.591	18.77	91.516	18.339	117.92	59.814	31.6	57.861	54.443	27.6	107.18	46.027	3.2143	74.71	43.355	3.3411	90.061	35.887	35.694	92.627	23.775	3.5628	91.368	40.934	1.9137
163	Male	69.21	RS1	147.24	98.733	20.701	16.618	102.63	31.023	112.06	54.932	30.8	51.025	55.908	37.2	96.918	40.792	5.0361	61.231	41.101	5.6369	83.278	29.145	41.988	82.23	14.277	6.9076	80.251	34.803	3.1966
164	Male	73.3	RS1	155.9	110.76	30.043	20.257	106.59	29.451	122.8	65.186	46.8	56.396	63.721	46	110.46	45.396	11.046	66.311	43.488	11.435	89.165	40.591	54.083	90.623	16.481	14.002	88.782	35.703	3.7741
165	Female	57.34	RS1	150.17	112.8	24.602	28.713	105.37	21.808	121.34	68.603	30	64.209	63.232	27.6	109.4	59.052	5.6637	81.042	57.086	6.2892	95.083	42.349	36.809	95.748	35.795	4.8419	95.452	54.062	3.7728
166	Female	60.71	RS1	153.27	103.82	40.154	25.068	102.81	30.29	122.31	58.35	54.8	51.514	57.861	52.4	108	36.049	17.532	70.353	35.335	14.587	86.435	36.28	63.209	88.033	11.21	21.397	89.015	28.511	9.2743
167	Male	71.94	RS1	153.97	95.958	31.608	24.308	92.715	19.462	117.43	56.396	47.6	58.35	54.443	41.2	112.26	33.079	7.9125	75.129	31.373	6.1987	88.609	31.229	52.817	94.631	3.5322	10.126	95.36	22.934	0.5613
168	Female	82.61	RS1	157.25	105.1	36.875	26.814	106.55	39.438	120.36	70.068	56.4	63.721	71.045	58.8	106.63	50.306	17.478	74.974	49.876	17.335	92.064	46.871	64.354	92.726	25.108	22.87	90.784	43.648	11.348
169	Female	79.67	RS1	150.75	107.58	43.331	25.326	106.41	44.679	117.92	69.092	64.4	56.885	68.603	66.8	106.62	41.321	29.213	69.481	39.898	29.77	90.22	44.484	75.968	91.09	20.016	36.312	88.374	33.048	23.755
170	Male	72.32	RS1	159.33	108.41	27.942	24.009	93.579	34.091	130.62	65.674	45.2	65.186	57.861	46.8	116.96	41.658	6.1656	79.589	37.507	7.5364	100.78	29.279	51.737	101.32	12.153	8.993	99.414	31.958	2.5541
171	Female	85.59	RS1	156.23	104.58	25.769	30.336	88.674	34.432	129.64	65.674	46	70.068	59.326	50.8	116.91	48.449	7.1314	84.233	43.602	7.9999	103.25	37.172	53.365	104.42	24.479	8.666	101.27	40.184	2.6248
172	Male	60.5	RS1	158.42	98.986	26.48	24.624	97.498	34.913	127.69	55.42	56.4	61.768	55.42	59.6	112.47	36.395	15.184	70.394	37.115	19.489	94.35	32.46	67.55	90.791	9.2413	22.419	91.356	28.005	9.2503
173	Male	67.32	RS1	157.1	110.06	29.118	22.682	98.063	33.769	128.66	57.373	44.4	60.791	52.49	46.8	116.26	39.951	5.7903	77.694	33.788	5.3794	96.075	31.211	53.312	100.88	9.4942	9.3981	98.585	28.74	-0.099772
174	Female	68.38	RS1	157.97	104.62	45.372	30.717	91.3	45.47	125.24	71.045	72.4	67.139	66.162	73.2	114.03	43.412	36.302	82.316	38.766	35.607	98.434	43.246	79.655	101.43	18.513	41.103	99.61	34.489	30.274
175	Female	81.11	RS1	143.82	85.042	32.087	20.99	99.283	30.424	107.18	54.443	51.6	47.607	59.326	50	93.324	34.378	6.8125	58.239	38.51	6.6163	75.438	31.047	57.542	75.056	12.002	13.357	75.68	29.179	0.88621
176	Male	62.78	RS1	155.81	98.768	30.712	17.387	97.338	33.821	119.87	58.35	52.4	54.932	57.373	54	105.48	38.381	10.982	67.469	37.599	11.078	88.137	34.854	62.129	87.459	10.883	15.422	87.919	29.413	5.4233
177	Male	63.61	RS1	155.61	96.229	32.343	20.062	94.317	31.779	121.83	54.443	55.6	55.908	52.978	54.8	108.51	31.592	16.229	68.822	30.737	17.797	90.816	29.051	64.378	89.505	5.647	22.902	88.849	21.619	11.191
178	Male	60.02	RS1	153.13	105.73	20.966	19.913	108.37	23.499	117.92	55.42	32.4	52.49	58.35	32.4	103.56	45.332	4.5675	65.658	48.25	3.2748	85.318	32.355	36.936	84.575	26.545	4.8644	83.852	42.43	3.229
179	Male	60.14	RS1	145.97	96.327	27.293	13.232	91.013	34.927	113.04	53.467	47.6	49.072	52.49	54	99.689	33.885	11.379	58.565	31.544	14.985	82.33	30.539	58.01	80.222	6.8464	14.947	78.715	25.145	4.4288
180	Male	61.77	RS1	155.52	102.34	27.061	24.958	91.984	28.583	121.83	55.908	44.4	63.232	51.514	45.2	111.9	33.404	4.8151	74.441	30.943	4.2019	94.948	29.491	52.136	95.435	6.4976	5.6703	93.701	24.464	-2.6199
181	Female	64.53	RS1	152.42	104.85	29.625	28.277	101.84	32.083	121.34	64.697	55.6	62.744	63.232	57.2	106.21	40.293	15.346	74.291	39.982	16.289	93.225	41.744	62.307	91.027	20.927	24.191	90.173	34.496	12.419
182	Female	61.91	RS1	148.64	92.952	25.677	22.011	90.184	32.024	119.87	47.607	32.4	52.978	46.143	38	101.82	37.772	4.4751	65.399	37.356	4.9636	87.089	23.443	37.753	84.187	19.443	3.8417	83.432	34.833	2.1742
183	Female	60.82	RS1	155.76	104.7	19.945	29.341	96.598	27.919	125.73	57.861	33.2	68.603	54.932	38.8	112.04	44.758	5.0835	75.072	44.296	5.4503	98.512	33.811	39.194	95.386	25.885	5.8328	93.536	40.096	2.9509
184	Male	63.33	RS1	161.12	100.71	40.456	34.642	93.809	30.803	130.13	63.232	65.2	66.162	58.35	58.8	122.48	37.224	20.647	81.864	34.454	17.012	98.579	35.566	69.834	102.58	6.6758	26.824	104.6	25.872	12.653
185	Male	71.3	RS1	158.12	102.02	21.974	25.418	86.138	26.141	131.1	52.978	42	66.65	45.654	44.4	119.75	35.36	5.9184	79.496	29.996	6.0886	102.72	27.316	46.92	103.26	11.229	7.4799	100.33	26.746	-0.71989
186	Male	64.2	RS1	155.49	96.157	43.455	22.741	95.654	34.97	123.29	50.537	69.2	55.42	50.049	66	114.29	26.703	31.101	69.485	24.685	29.353	89.415	29.522	81.329	92.778	2.5316	42.032	93.059	15.117	23.945
187	Female	62.01	RS1	152.6	98.586	44.478	24.622	100.41	30.16	115.48	57.861	60.4	52.49	59.814	53.2	106.59	35.994	23.397	71.097	34.761	18.576	83.041	34.747	64.609	88.97	9.3453	28.741	90.173	28.29	16.113
188	Male	63.82	RS1	153.96	98.69	28.204	18.384	92.593	28.05	122.8	51.025	42	55.42	49.072	42.8	107.83	32.677	6.0197	71.405	31.58	5.195	91.521	21.898	49.495	93.908	4.9768	7.1068	90.035	24.967	2.1419
189	Female	62.48	RS1	152.65	98.668	25.543	22.394	104.46	27.381	116.46	56.396	37.2	52.49	58.35	38	100.56	40.048	4.9196	65.5	41.735	3.8738	84.548	33.946	40.886	82.149	20.014	3.5806	82.714	33.934	2.0356
190	Female	65.01	RS1	148.4	110.04	20.226	21.145	110.51	24.992	111.08	61.768	28.4	52.49	64.697	32.4	98.746	52.872	4.2184	58.468	55.605	2.4606	81.244	38.161	30.925	78.174	33.794	-0.59919	79.448	52.093	1.5595
191	Female	64.56	RS1	153.78	104.01	27.102	29.001	97.834	29.326	125.73	66.65	48.4	62.744	65.186	50	113.68	41.255	11.558	76.409	38.586	12.192	96.155	40.548	59.399	96.458	15.901	18.919	95.396	31.457	5.8689
192	Male	63.19	RS1	156.45	94.256	26.831	21.801	96.331	23.834	124.76	43.701	47.6	53.467	44.678	44.4	109.62	27.198	10.529	69.944	26.668	8.5695	89.225	22.705	60.144	91.025	1.8027	15.793	90.09	18.158	3.9811
193	Male	64.59	RS1	154.85	100.7	18.477	25.004	94.512	18.326	127.69	52.978	31.6	61.768	48.584	30	115.66	36.375	4.1301	77.41	34.534	2.9994	96.289	25.206	39.49	98.009	9.8834	4.1372	97.751	29.536	1.5056
194	Male	61.58	RS1	155.67	99.013	26.683	22.357	92.934	31.264	122.8	53.467	53.2	59.814	51.514	56.4	111	29.097	10.66	71.687	26.794	12.568	92.533	30.59	62.738	92.997	3.3634	15.091	91.906	20.628	4.3349
195	Female	64.06	RS1	147.69	105.95	29.285	28.794	97.071	33.066	120.85	66.162	49.2	64.209	61.279	50.8	108.99	45.034	10.65	76.525	42.584	12.066	94.693	43.453	53.317	95.014	21.562	16.425	92.85	36.497	5.5649
196	Female	70.53	RS1	151.01	106.5	31.018	26.708	89.155	38.232	124.27	63.232	54	64.697	57.373	58.8	111.29	42.258	21.71	78.474	38.094	22.722	97.34	36.018	61.555	97.508	20.558	27.151	95.37	35.803	16.868
197	Female	65.22	RS1	151.23	109.62	31.003	28.179	105.36	37.642	121.34	70.557	54.8	61.279	69.092	58.8	107.67	47.461	15.593	76.738	45.412	17.299	93.967	45.364	60.351	94.783	23.118	20.031	92.846	39.032	9.9982
198	Female	70.52	RS1	152.49	109.17	19.554	20.899	112.02	17.984	116.46	67.627	33.2	56.396	69.092	33.2	104.94	51.237	3.0921	66.013	53.264	3.7917	85.06	42.214	36.416	82.337	34.703	1.8617	85.319	49.364	0.56574
199	Male	62.92	RS1	154.13	100.9	36.032	26.002	92.79	35.885	122.8	55.908	58.8	60.791	52.978	58	112.78	32.883	20.894	73.659	31.222	21.593	92.851	32.923	68.641	92.259	7.9716	28.899	91.973	24.262	15.951
200	Male	64.01	RS1	149.81	95.694	30.743	18.284	94.701	33.255	115.97	49.561	54	53.467	48.584	56.4	106.85	26.364	15.256	62.17	24.802	15.825	86.303	25.403	64.399	87.42	1.4495	22.624	85.066	15.763	6.9798
201	Female	64.16	RS1	149.71	105.45	18.766	28.186	113.69	23.92	117.43	58.838	27.6	52.49	64.209	30	102.55	52.447	3.3458	64.065	55.244	4.082	83.396	38.834	29.872	82.026	33.288	0.67702	82.603	51.618	4.8703
202	Female	63.52	RS1	149.13	96.914	26.215	25.228	97.388	34.344	117.92	57.373	48.4	56.396	57.373	53.2	103.28	34.58	16.336	64.647	34.628	19.935	87.286	36.658	57.295	83.388	15.201	25.389	83.003	27.256	13.091
203	Male	61.74	RS1	156.74	103.04	26.28	25.457	89.59	26.491	128.17	53.955	38	64.209	47.119	38.8	115.12	38.034	6.0371	77.592	32.509	5.6223	97.7	27.94	47.068	98.72	9.1491	7.9188	97.242	26.244	4.0336
204	Female	63.85	RS1	160.64	118.37	24.967	34.913	110.21	22.351	134.03	72.51	31.6	68.115	68.603	30.8	119.76	63.144	3.2077	84.697	59.809	2.7107	102.4	48.341	35.361	103.22	42.499	0.13932	102.55	59.303	0.046854
205	Female	65.16	RS1	147.44	97.393	19.775	22.985	102.43	23.485	115.48	55.908	31.6	52.49	58.838	34	97.28	44.163	3.6918	66.577	44.945	4.4929	82.864	36.769	37.666	82.671	24.015	4.1825	82.904	38.432	0.41274
206	Female	62.83	RS1	157.09	109.17	22.888	19.013	111.61	39.754	121.34	68.115	40.4	57.373	70.557	50	101.78	49.99	8.3676	65.562	52.09	11.243	89.88	46.507	52.437	84.044	27.084	13.246	82.087	43.679	3.9357
207	Female	63.76	RS1	154.01	102.65	36.006	28.732	92.688	38.412	127.2	57.373	62	60.303	51.025	62.8	116.51	32.05	24.885	74.976	29.75	26.098	95.224	34.634	70.606	96.711	11.56	32.548	96.226	23.171	19.509
208	Female	62.98	RS1	156.24	97.039	38.536	29.687	104.75	38.464	122.31	63.232	58	58.35	66.65	58	108.25	45.273	17.847	71.775	47.244	16.828	89.662	42.705	62.078	88.913	22.458	18.698	90.256	40.283	8.1871
209	Male	67.11	RS1	148.99	89.091	31.789	23.737	92.776	36.771	119.87	43.701	52.4	52.978	46.143	55.6	108.39	26.47	9.6394	62.065	27.118	10.177	86.375	22.938	63.096	87.3	1.4857	15.844	84.813	20.009	3.3093
210	Female	64.37	RS1	150.72	115.9	23.651	26.679	111.33	22.209	119.87	72.021	30.8	60.303	70.557	31.6	108.8	57.557	3.9096	73.281	55.744	3.2543	90.532	44.47	31.213	91.93	34.351	-0.74273	90.77	51.267	2.1877
211	Female	74.76	RS1	152.34	112.28	25.443	20.246	104.7	32.311	120.36	67.139	38	55.42	64.697	42	103.26	51.849	4.685	70.21	51.267	4.1512	88.904	39.405	39.823	87.493	31.656	4.4074	86.066	46.946	2.6635
212	Female	61.93	RS1	151.96	106.24	24.659	25.176	103.07	32.803	123.29	65.674	44.4	59.814	62.744	47.6	109.74	43.543	6.2024	70.578	41.804	7.7736	91.518	38.979	49.739	91.629	21.556	10.324	90.379	36.603	0.69942
213	Male	63.93	RS1	156.25	105.07	24.065	19.932	99.631	21.439	120.85	52.978	38.8	55.42	52.49	38.8	106.9	39.582	7.1044	68.827	40.451	6.1024	88.434	32.185	44.533	87.475	12.501	9.4668	86.749	33.013	3.4247
214	Male	77.04	RS1	153.94	90.36	40.32	20.348	100.12	33.418	112.55	55.42	61.2	52.002	59.814	57.2	105.75	31.04	17.799	60.233	35.495	15.244	79.366	31.403	67.377	79.562	4.3901	20.248	82.743	25.808	7.0764
215	Male	64.08	RS1	158.22	119.1	27.21	22.427	99.59	20.997	128.66	64.209	46	59.326	55.908	44.4	116.17	43.989	6.4245	78.238	40.265	5.1886	96.088	32.725	54.182	99.56	12.881	11.626	98.6	34.084	0.98174
216	Female	61.82	RS1	151.08	85.689	23.056	29.463	86.936	29.214	121.34	47.119	42.8	60.303	48.096	46	108.33	30.168	6.259	72.184	30.272	6.6034	92.208	23.524	46.603	90.17	8.3895	7.668	89.701	24.296	0.44931
217	Female	63.12	RS1	153.48	104.08	28.008	22.62	97.504	26.393	119.87	55.908	42	57.861	52.978	41.2	106.05	40.448	4.7279	70.5	39.991	4.8845	89.961	31.987	42.442	87.863	18.106	5.2748	88.146	33.673	0.94265
218	Male	63.72	RS1	157.73	98.378	37.314	23.599	93.414	25.028	117.92	58.35	54.8	59.814	54.443	48.4	114.07	34.02	15.776	72.274	31.869	13.285	90.248	27.141	57.839	94.13	6.7808	17.214	94.947	25.366	8.5958
219	Male	62.47	RS1	155.35	98.939	25.863	27.726	91.115	19.599	124.76	54.443	43.6	60.791	52.49	38.8	115.17	35.25	8.0715	75.092	33.28	6.7496	93.509	28.077	50.389	95.178	6.0184	11.009	95.412	25.774	2.7958
220	Male	65.19	RS1	156.5	90.568	35.383	22.492	93.352	36.766	125.73	46.143	61.2	55.42	47.607	62	112.99	23.851	20.913	65.567	24.131	20.355	89.276	19.705	72.441	89.141	2.6257	27.89	87.26	15.495	11.577
221	Male	64.91	RS1	156.9	97.91	33.563	24.917	95.094	30.717	124.27	53.467	53.2	56.885	52.002	52.4	112.46	32.668	16.322	70.007	33.179	16.455	90.51	31.48	65.925	90.753	5.3588	20.891	90.908	22.638	9.2479
222	Female	86.55	RS1	148.03	103.29	26.115	28	99.458	37.998	120.85	64.209	51.6	58.35	64.209	58	104.98	42.1	15.507	68.328	40.602	18.521	91.355	41.073	60.865	88.441	18.44	21.646	86.666	35.594	10.911
223	Female	62.13	RS1	153.07	102.33	23.67	27.164	100.9	27.52	121.83	60.791	40.4	60.791	61.279	42	105.46	39.404	5.8404	74.737	39.516	5.9813	92.169	38.324	45.451	91.031	17.995	6.9472	90.4	31.358	3.7763
224	Female	91.25	RS1	148.35	107.56	29.296	24.15	94.609	32.987	120.85	64.697	49.2	59.814	58.838	50.8	108.14	44.159	9.1581	74.782	41.748	11.074	91.706	37.184	55.986	91.898	19.72	12.193	91.868	37.679	4.0467
225	Male	63.26	RS1	157.87	92.685	22.93	24.687	92.843	22.375	122.31	48.584	39.6	60.791	49.072	41.2	112.51	27.922	8.3309	72.839	26.337	8.0137	92.299	26.75	49.865	95.403	2.2677	13.482	93.626	18.343	2.5306
226	Female	75.66	RS1	156.47	101.14	46.638	30.238	95.829	39.777	126.71	64.209	70.8	60.791	62.256	67.6	117.44	41.556	30.927	79.805	38.947	27.652	95.492	41.848	76.561	103.48	17.393	36.328	100.61	32.087	23.393
227	Male	75.87	RS1	155.25	104.88	15.914	13.603	101.3	24.654	117.43	57.373	22	52.002	57.373	27.6	97.801	47.28	-5.4105	61.06	46.166	-3.7253	84.973	30.753	29.036	81.302	22.893	-5.4016	79.541	44.885	-4.0983
228	Male	74.72	RS1	155.03	100.97	28.147	20.577	94.151	39.084	125.73	58.838	53.2	61.279	53.955	60.4	112.1	34.115	21.511	74.563	29.691	25.333	96.828	34.038	66.849	98.907	6.5627	29.32	95.027	22.8	17.731
229	Female	69.51	RS1	160.17	109.94	47.648	28.555	97.58	40.417	129.15	68.603	57.2	63.721	63.232	53.2	119.77	49.548	12.224	84.861	46.733	9.4003	99.267	38.642	59.93	104.32	18.863	13.014	104.31	40.701	4.1565
230	Male	66.22	RS1	156.1	92.026	21.691	19.515	85.251	29.075	125.73	49.561	54	60.303	47.119	57.2	113.45	32.494	16.79	68.836	26.858	18.017	95.958	26.264	67.172	92.625	6.3777	22.492	90.409	23.209	11.932
231	Female	71.9	RS1	159.75	90.339	44.054	28.988	89.768	44.192	124.76	54.932	66	63.232	55.42	65.2	114.14	32.466	27.786	75.222	32.561	27.677	94.25	34.647	72.34	95.091	13.63	35.802	95.097	27.361	23.77
232	Male	67.4	RS1	148.06	90.485	32.99	18.772	103.54	25.223	108.64	58.838	55.6	46.143	65.674	53.2	98.316	38.34	18.311	58.106	41.348	14.424	75.1	41.186	64.874	78.205	16.645	22.297	79.271	32.357	9.9253
233	Female	70.3	RS1	156.08	109.77	32.554	25.735	99.344	33.366	124.76	65.186	48.4	64.209	60.303	49.2	110.99	50.671	9.2832	76.778	48.884	8.5047	95.388	42.059	52.848	97.213	28.662	11.397	93.41	44.563	2.1319
234	Female	62.24	RS1	158.26	108.84	38.048	28.481	114.76	29.046	122.8	63.721	42.8	57.861	66.162	38.8	107.76	47.73	4.22	73.265	49.999	3.4005	88.538	43.151	42.729	90.364	26.005	4.499	91.148	41.423	1.5397
235	Male	63.37	RS1	153.18	88.957	34.441	22.239	90.135	31.946	117.43	47.119	54	56.396	48.096	51.6	108.67	28.061	14.586	70.421	27.434	13.311	88.098	23.931	61.827	90.012	4.2259	19.275	90.105	20.454	8.2434
236	Female	61.31	RS1	150.51	105.98	20.621	29.897	107.64	20.61	121.83	61.279	27.6	59.814	60.303	26.8	109.01	50.994	4.4276	74.338	51.279	2.4498	91.642	37.857	32.021	92.519	31.457	2.0722	91.639	48.031	3.7728
237	Female	61.02	RS1	152.7	105.1	35.506	24.817	106.63	30.616	115.97	63.721	51.6	57.861	65.674	49.2	107.59	47.449	10.175	69.108	47.698	8.8365	88.037	39.362	51.592	88.435	27.339	9.8514	88.504	44.039	2.6816
238	Female	61.1	RS1	152.8	97.303	40.273	29.115	98.886	31.952	119.38	59.814	55.6	59.814	61.768	51.6	107.15	35.745	16.669	73.379	36.044	14.23	88.379	36.119	58.896	88.139	13.768	21.407	89.593	28.951	10.047
239	Male	61.4	RS1	151	94.984	32.561	20.23	102.22	29.704	115.97	52.978	48.4	48.096	56.885	48.4	100.4	34.411	11.904	60.367	36.592	13.23	80.856	34.558	54.974	80.099	13.317	17.794	80.041	27.331	6.9271
240	Female	76.79	RS1	155.19	112.19	31.455	30.196	103.35	34.076	123.29	72.021	53.2	68.603	68.603	54	113.93	55.065	11.215	79.836	51.947	11.656	98.139	48.194	59.265	98.33	31.758	15.455	96.419	48.376	5.0424
241	Female	63.29	RS1	152.27	106.02	27.716	30.107	97.082	32.211	124.27	65.674	49.2	64.209	60.791	53.2	113.23	46.879	11.051	77.62	42.574	11.33	96.653	41.871	55.114	99.117	25.987	16.669	96.299	39.501	5.6942
242	Male	63.69	RS1	154.02	95.313	20.567	24.234	95.414	29.219	124.27	53.467	46	58.35	54.443	50	107.05	30.892	6.9448	68.208	31.297	10.404	90.482	26.011	57.076	85.897	4.9603	11.53	86.38	23.383	2.1778
243	Female	63.38	RS1	158.38	101.85	38.341	32.622	91.865	28.2	131.59	61.768	61.2	66.65	56.885	56.4	122.77	39.426	21.734	86.511	38.778	16.871	100.99	40.2	68.644	107.71	11.39	26.653	106.3	29.026	13.43
244	Female	63.05	RS1	148.6	99.933	25.284	23.58	112.82	26.413	114.01	59.814	48.4	51.025	68.115	47.6	100.16	45.966	10.491	60.527	49.899	9.6622	80.611	42.649	55.047	77.867	24.8	11.327	80.039	42.066	3.4943
245	Male	66.24	RS1	162.24	115.06	17.903	22.024	98.318	15.758	135.5	69.58	31.6	64.697	59.326	26.8	121.15	58.099	5.7334	82.331	50.728	4.6475	101.43	36.401	36.581	103.05	30.608	4.4069	101.54	50.259	4.1508
246	Female	62.15	RS1	147.87	102.29	20.405	27.778	104.84	25.466	117.92	64.697	38	58.35	67.139	41.2	105.3	49.213	5.904	68.613	49.448	6.3709	88.319	37.196	45.004	87.011	26.008	8.2651	87.241	42.87	3.2907
247	Male	76.01	RS1	151.6	112.66	31.723	21.133	109.6	35.642	118.9	68.603	51.6	54.443	67.627	54.8	104.22	46.342	18.899	66.064	45.927	19.961	87.608	47.955	61.207	84.781	23.705	25.64	84.579	38.911	12.921
248	Male	66.44	RS1	152.37	86.926	31.155	19.782	88.333	34.258	121.83	47.607	55.6	53.955	48.584	58	105.15	22.516	20.742	67.029	22.407	19.98	87.328	21.68	67.108	88.495	1.9963	24.704	86.832	13.991	12.789
249	Male	62.43	RS1	152.05	103.06	27.869	23.894	101.48	34.926	122.8	62.256	50	58.35	61.768	54.8	108.52	40.441	15.527	67.914	39.408	18.203	91.745	38.537	60.209	89.719	16.204	22.52	88.42	31.128	11.846
250	Male	79.98	RS1	159.63	104.1	32.279	24.126	98.245	29.08	123.78	64.697	54.8	64.697	63.721	52.4	116.03	40.676	14.4	74.973	37.874	12.992	95.672	37.597	62.488	96.978	12.086	17.396	96.233	30.92	4.7246
251	Female	62.05	RS1	146.79	110.67	30.266	17.625	99.814	30.239	114.5	65.674	40.4	56.396	61.279	42	104.32	56.717	4.5305	68.369	52.821	4.5084	87.565	42.855	43.722	90.292	31.84	6.7118	88.455	48.604	1.9406
252	Male	61.98	RS1	156.22	106.07	32.812	18.695	95.818	36.785	121.83	62.256	52.4	60.303	57.861	55.6	111.92	42.036	11.842	70.773	39.028	12.976	93.898	31.852	60.166	94.968	11.201	13.643	92.171	31.731	3.8891
253	Male	63.48	RS1	156.1	94.648	32.246	18.049	103.17	33.089	117.92	56.885	54.8	51.514	58.838	56.4	104.7	31.667	18.244	63.55	33.869	19.056	84.229	28.562	63.277	84.816	6.4478	22.227	83.281	24.921	11.71
254	Female	66.05	RS1	147.24	110.01	24.991	21.344	116.27	35.458	114.01	69.58	38.8	50.537	71.533	44.4	94.72	51.369	7.8834	60.56	53.165	8.4836	81.09	47.273	47.566	75.585	28.551	10.506	75.326	45.484	3.3377
255	Female	86.59	RS1	142.8	102.98	26.525	20.641	103.83	35.717	114.5	67.627	50.8	54.443	67.627	55.6	99.794	46.113	12.696	62.073	45.274	14.933	84.321	42.917	57.72	81.927	20.434	19.356	79.745	39.134	8.7358
256	Female	63.51	RS1	147.78	111.42	19.573	24.371	106.51	28.301	120.36	68.115	32.4	57.373	66.162	38	105.82	52.84	2.0616	65.92	52.107	4.2545	89.495	43.985	36.995	86.489	32.042	-0.11454	85.691	47.143	-1.7152
257	Female	61.56	RS1	156.98	111.25	36.505	29.443	105.34	30.689	126.22	68.115	53.2	65.186	63.721	50.8	117.98	48.711	15.445	79.188	45.875	14.55	96.603	42.137	58.305	100.78	26.074	21.237	100.04	40.516	10.557
258	Female	64.45	RS1	161.89	106.11	32.37	33.542	94.843	26.457	133.54	59.814	54	69.092	54.932	50	124.13	37.612	12.956	87.117	31.921	10.833	103.97	32.557	56.617	108.39	11.502	16.914	106.31	28.307	7.0085
259	Female	64.14	RS1	146.97	102.77	28.579	23.149	110.41	23.359	112.55	63.232	41.2	47.607	67.627	37.2	97.267	47.94	6.1597	64.161	51.059	5.9509	78.132	40.732	41.878	78.711	27.195	6.1315	80.675	42.853	4.8168
260	Male	78.15	RS1	153.94	104.32	22.34	19.976	88.162	29.429	126.22	53.955	40.4	61.279	46.143	45.2	114.2	36.489	8.3159	73.582	30.137	8.8933	97.749	28.34	52.207	98.107	3.9507	11.571	95.409	25.064	3.8873
261	Male	64.92	RS1	152.67	92.397	29.154	15.252	96.321	29.946	113.53	48.096	50.8	44.678	52.49	51.6	96.934	28.414	11.826	56.204	31.6	11.942	77.897	28.592	61.741	74.669	2.7524	18.457	76.051	19.762	5.0413
262	Male	63.96	RS1	159.3	99.873	29.713	25.428	100.17	31.681	124.76	64.697	54	63.721	64.697	55.6	111.89	40.801	11.421	72.241	41.818	12.907	93.472	39.143	62.08	90.096	12.292	18.114	90.454	32.104	4.506
263	Female	64.1	RS1	147.06	111.2	34.201	27.516	105.49	33.368	119.38	64.209	46.8	57.373	61.768	46	106.25	44.986	10.703	70.817	42.385	9.2715	90.079	39.47	53.101	89.048	20.238	12.844	88.021	37.096	3.7485
264	Male	61.62	RS1	158.22	99.443	27.555	26.09	93.068	19.352	123.78	58.35	42	62.744	54.443	38	114.59	37.028	6.7435	75.49	36.257	5.5773	92.858	27.34	47.556	94.395	4.6891	9.1996	94.416	27.688	2.4172
265	Male	76.93	RS1	159.01	94.834	33.172	27.9	99.139	35.93	121.34	52.49	50.8	62.256	53.955	53.2	112.98	32.92	11.567	69.147	31.984	13.583	92.237	31.811	59.077	92.074	6.8443	18.628	91.555	23.282	6.0113
266	Male	61.65	RS1	154.52	103.03	30.084	27.855	101.05	28.426	123.78	66.65	49.2	61.279	66.65	49.2	112.94	50.482	5.9763	69.978	51.369	5.3622	91.275	38.165	51.308	90.156	23.449	6.9554	90.751	43.732	-0.14801
267	Female	65.2	RS1	151.07	106.4	39.056	30.556	104.09	38.412	122.31	62.256	51.6	61.279	60.791	50.8	110.01	42.516	12.093	75.594	41.997	11.272	92.176	37.149	56.426	93.305	21.322	15.839	93.142	37.55	5.2406
268	Male	60.76	RS1	152.12	99.606	42.345	23.577	92.452	41.61	121.34	58.838	73.2	57.373	54.443	72.4	110.18	26.703	38.92	71.615	24.42	39.614	90.663	34.764	85.49	92.604	3.3834	47.562	92.221	16.281	30.679
269	Female	62.42	RS1	150.58	100.94	24.632	20.429	92.513	32.181	120.36	58.35	45.2	58.838	52.978	49.2	105.09	38.64	8.9728	71.65	37.026	9.9851	91.298	31.995	50.324	88.556	14.491	12.289	87.7	30.8	3.7792
270	Male	59.96	RS1	153.8	102.5	24.695	18.819	99.585	31.858	120.36	62.744	51.6	56.396	59.326	55.6	104.75	33.364	15.372	64.38	33.696	18.807	89.319	31.868	64.173	84.131	6.0151	21.444	83.721	23.439	8.5319
271	Female	62.45	RS1	151.89	109.75	26.407	24.857	109.83	23.923	116.46	62.744	36.4	57.373	63.232	36.4	104.26	51.762	4.6947	68.176	52.583	4.3474	85.806	42.537	39.125	88.032	31.342	5.1927	87.499	47.049	1.1385
272	Male	61.98	RS1	149.97	90.545	23.583	15.821	98.746	31.569	111.57	53.955	42.8	50.537	56.885	48.4	96.894	33.675	7.8787	58.129	34.596	9.2113	79.55	28.978	51.687	75.934	6.6652	13.967	76.08	24.863	3.4384
273	Female	63.61	RS1	158.87	106.26	30.789	30.928	94.158	31.872	127.2	66.162	50	67.139	61.279	50	119.32	44.226	13.404	80.265	39.92	12.8	99.908	38.335	54.979	102.99	20.818	17.146	100.49	35.316	7.1233
274	Male	65.4	RS1	158.83	95.314	30.983	24.067	82.457	37.89	128.66	52.49	57.2	63.232	47.119	59.6	115.17	29.485	20.594	75.408	27.909	22.993	96.867	26.088	68.106	93.154	4.1064	26.922	92.773	20.688	16.15
275	Male	64.85	RS1	157.67	100.93	42.267	26.313	88.541	45.542	126.71	58.838	74.8	63.232	52.978	77.2	116.27	31.721	38.3	76.858	26.959	38.119	96.77	33.769	88.228	100.29	4.654	48.395	98.257	19.811	33.294
276	Male	61.75	RS1	153.92	95.225	15.357	25.446	87.848	21.13	124.76	54.932	30	65.674	49.561	37.2	111.65	35.229	5.8126	73.479	30.71	3.8547	98.33	21.836	40.383	94.441	3.7511	6.0472	93.446	23.628	3.2753
277	Male	62.92	RS1	157.6	96.329	22.935	30.963	102.36	20.187	122.31	61.279	38	62.744	62.256	35.6	108.34	40.247	5.2436	75.781	42.25	5.3208	89.873	30.489	40.275	90.449	15.67	6.7287	92.412	33.801	1.9889
278	Female	62.69	RS1	156.81	108.18	30.737	31.618	95.516	34.356	131.59	66.162	48.4	68.115	58.838	50.8	117.9	46.584	10.37	84.739	42.727	10.459	102.54	39.864	57.811	106.61	22.028	13.199	103.04	36.974	4.7056
279	Female	60.17	RS1	151.04	99.808	36.084	29.046	96.194	41.689	121.83	66.162	64.4	63.232	64.697	69.2	109.93	38.919	29.865	71.703	37.875	32.763	93.788	45.269	76.875	93.058	14.424	42.561	90.939	27.899	28.198
280	Male	62.98	RS1	152.78	94.212	34.265	18.83	95.914	35.053	116.94	50.049	54.8	53.955	50.537	56.4	102.15	30.255	14.931	66.188	30.741	15.655	84.727	26.021	66.812	84.034	2.1784	21.66	83.941	20.881	8.7329
281	Female	60.83	RS1	140.67	105.28	33.066	21.794	118.2	34.146	106.2	65.186	50.8	46.631	71.045	52.4	91.373	47.894	14.142	55.306	50.221	15.522	75.602	47.125	57.539	71.699	29.407	19.637	72.417	44.252	9.6853
282	Male	75.89	RS1	152.9	102.72	33.691	17.91	102.86	35.86	119.87	64.209	65.2	52.002	61.279	65.2	107.14	32.864	33.454	65.361	32.45	34.743	85.871	38.988	77.979	87.672	10.76	41.446	86.756	24.783	27.656
283	Female	61.42	RS1	151.24	105.77	36.589	27.484	111.92	32.657	117.43	66.65	45.2	54.932	70.068	43.6	105.21	53.859	5.7206	69.339	54.893	4.9083	85.131	43.209	46.034	86.56	30.308	5.1069	87.489	47.333	1.5318
284	Male	64.8	RS1	161.63	100.69	32.681	28.255	91.085	30.229	128.66	54.932	53.2	66.162	50.537	51.6	119.82	33.217	13.838	74.074	32.416	12.641	98.201	32.938	59.806	96.868	4.0005	16.39	96.089	23.009	4.8238
285	Female	64.84	RS1	141.43	95.714	27.224	19.298	104.6	26.364	104.74	65.674	46	49.561	70.557	46	88.918	49.511	12.579	60.634	52.016	12.756	75.578	46.863	49.225	73.523	32.256	14.13	73.762	45.566	6.7031
286	Female	63.2	RS1	152.07	96.324	18.218	23.316	94.15	24.402	118.9	54.443	35.6	60.303	52.978	38.8	104.38	38.223	3.9222	70.958	37.774	4.6444	90.446	26.251	40.322	88.869	14.691	4.5982	88.142	33.083	1.0046
287	Male	60.83	RS1	144.31	95.029	20.47	17.311	108.96	30.248	110.6	54.932	45.2	45.166	61.279	48.4	88.039	35.669	5.7362	51.134	40.399	7.641	74.678	32.173	50.439	64.786	11.072	8.888	67.72	29.325	3.3589
288	Female	82.47	RS1	155.02	105.91	38.205	31.189	98.047	32.82	125.24	63.232	51.6	63.232	58.35	50	114.37	42.073	14.031	80.044	39.538	13.619	96.382	38.205	58.893	99.49	16.974	17.177	97.775	34.337	6.6777
289	Male	66.83	RS1	149.73	95.98	19.478	16.349	103.73	22.365	116.46	49.072	35.6	44.678	53.467	36.4	98.765	35.017	4.5785	58.559	37.223	3.5507	79.405	25.356	43.185	76.048	13.714	3.9684	77.796	30.566	0.44151
290	Male	72.35	RS1	145.11	108.09	25.505	22.467	107.33	28.057	114.5	71.045	46	54.443	70.557	47.6	102.27	53.716	6.8665	66.401	51.626	7.5204	85.619	42.391	50.002	82.634	27.45	10.729	82.534	45.154	2.2999
291	Female	63.33	RS1	149.07	118.59	23.466	30.88	94.502	27.847	125.73	73.486	40.4	70.068	63.232	44.4	114.92	53.887	4.7075	85.285	48.733	4.6964	101.84	45.175	44.285	106.98	30.045	8.8414	102.35	46.061	-0.36945
292	Female	61.38	RS1	157.5	90.148	36.682	27.143	99.923	16.013	118.41	48.096	43.6	56.885	52.978	33.2	108.46	31.188	5.2129	76.914	33.59	5.1517	84.836	27.288	42.909	90.962	11.838	5.1825	93.328	25.281	2.6252
293	Female	60.99	RS1	147.67	104.73	34.374	26.627	111.62	29.456	114.5	66.162	49.2	53.467	68.115	46	101.8	51.365	7.0772	67.574	52.712	6.174	83.552	43.179	50.418	82.87	30.334	7.2525	84.29	46.712	1.3117
294	Female	67.39	RS1	142.06	100.66	21.658	18.834	106.24	25.994	110.6	61.768	37.2	48.584	63.721	38.8	95.681	49.084	5.4567	58.922	50.793	5.133	79.347	40.363	41.027	78.145	32.025	5.3145	76.796	44.351	3.2275
295	Male	65.1	RS1	155.3	92.993	27.813	20.951	93.463	31.32	119.87	48.096	47.6	54.443	50.049	48.4	105.12	30.392	6.6007	65.658	31.722	7.214	86.903	27.949	59.703	84.201	4.152	11.122	84.286	23.228	1.1661
296	Male	73.04	RS1	145.56	104.75	21.317	15.271	108.61	23.784	111.08	63.721	38	46.143	67.139	38	96.328	50.185	7.3139	58.347	51.409	8.0045	77.534	41.832	41.98	74.099	30.317	6.939	76.294	46.052	5.1755
297	Female	75.21	RS1	145.34	108.1	33.639	20.237	119.13	32.281	112.06	69.58	48.4	46.143	74.951	49.2	94.741	52.778	8.3587	55.661	55.364	8.8314	77.424	45.078	51.317	72.207	31.113	7.6678	74.481	49.107	1.2455
298	Female	62.13	RS1	153.35	98.682	24.696	23.851	86.497	34.883	126.22	52.978	50.8	61.768	48.096	57.2	111.51	26.167	19.129	71.909	23.18	23.024	96.359	27.309	62.617	93.679	3.2845	28.612	91.296	17.187	15.84
299	Female	75.09	RS1	154.79	93.039	37.41	30.256	96.172	25.099	117.92	54.932	57.2	59.326	56.396	50.8	107.13	31.026	14.567	74.266	31.39	12.669	87.554	31.231	61.368	89.87	10.209	19.538	91.644	26.352	8.3679
300	Female	61.21	RS1	151.41	104.77	28.171	20.786	104.12	39.507	117.92	62.256	43.6	54.932	64.209	50.8	98.417	48.801	6.9677	66.576	48.904	9.9486	86.499	38.998	48.714	81.112	25.788	8.1124	81.604	43.468	1.9512
301	Male	70.85	RS1	150.82	102.52	31.836	21.333	106.02	35.823	114.01	63.232	47.6	54.932	64.697	50	101.61	45.48	7.9838	64.198	44.966	8.8597	84.411	41.708	55.68	84.83	21.097	12.657	84.5	37.713	2.46
302	Female	62.33	RS1	147.43	104.23	23.188	25.139	109.26	26.315	114.01	65.186	40.4	56.885	66.65	42	99.647	45.364	8.3751	68.293	46.251	7.8319	85.075	43.563	44.254	83.851	24.706	6.476	83.561	37.524	4.8847
303	Female	61.43	RS1	156.1	101.01	28.989	24.185	101.57	25.42	120.36	60.791	49.2	55.908	62.256	49.2	107.11	39.478	13.881	71.961	39.678	12.932	87.633	36.921	57.174	90.007	14.747	18.205	89.485	31.366	7.6981
304	Female	61.52	RS1	149.93	106.82	31.225	24.692	109.56	32.405	115.48	70.068	47.6	55.42	72.51	47.6	100.41	55.524	8.7378	66.665	55.908	8.7987	85.836	48.481	54.242	83.685	30.122	11.915	81.919	48.248	3.2379
305	Female	63.23	RS1	155.92	104.66	31.192	21.532	99.183	33.21	122.8	63.232	42.8	56.885	61.279	46	104.62	48.534	9.7754	71.541	47.604	10.338	90.272	40.952	50.134	88.811	27.039	13.502	88.294	41.703	5.0766
306	Female	61.63	RS1	153.93	106.83	33.478	27.041	104.08	29.162	120.85	65.674	52.4	56.396	65.186	49.2	107.98	44.856	7.8154	72.269	46.019	6.4069	89.242	40.949	55.671	89.855	26.053	10.574	90.226	40.534	2.4049
307	Male	88.8	RS1	160.39	88.133	27.612	19.586	86.123	31.683	127.2	46.143	54	58.35	45.166	57.2	109.66	24.657	12.84	71.922	23.644	13.578	93.007	22.665	68.042	90.595	1.8075	20.906	89.89	16.949	5.9925
308	Female	61.97	RS1	144.81	103.5	23.019	20.249	108.05	28.332	113.04	65.674	42.8	49.561	66.65	46	96.213	44.444	8.7322	62.243	45.215	9.8285	80.992	41.796	47.609	80.501	24.791	16.238	79.407	38.084	6.8924
309	Male	61.6	RS1	157.32	80.246	39.777	22.97	82.585	33.874	120.85	45.654	63.6	54.932	47.119	60.4	109.15	29.055	18.556	66.142	29.506	16.177	87.138	23.631	72.385	87.431	2.2702	24.199	87.75	21.198	10.371
310	Female	60.97	RS1	140.6	98.751	33.195	24.709	100.67	30.656	111.08	60.791	50.8	52.49	61.279	50	97.865	40.909	15.01	66.329	41.027	14.37	82.113	38.305	56.471	80.58	19.589	19.678	82.014	33.17	8.5416
311	Female	60.8	RS1	142.15	101.86	38.664	29.439	104.97	41.074	114.99	64.697	58	57.373	64.209	60.4	101.14	43.09	17.066	69.265	43.846	17.658	86.521	41.868	61.776	84.41	21.753	22.607	84.124	36.528	10.45
312	Male	64.19	RS1	155.25	99.209	33.81	19.946	98.371	36.198	119.38	56.396	58	55.42	56.885	59.6	106.33	32.987	18.588	65.817	34.081	18.88	87.542	32.173	70.826	85.421	5.2363	24.805	84.563	23.85	10.676
313	Male	63.02	RS1	160.09	95.867	22.96	25.42	94.612	27.316	127.69	50.049	38	64.697	50.537	39.6	114.71	33.283	6.5797	76.46	32.24	5.131	95.44	24.504	46.003	94.458	8.7203	6.7865	95.503	26.487	3.394
314	Male	61.48	RS1	155.07	105.08	22.554	20.488	98.802	29.719	122.8	58.838	42.8	56.885	55.908	47.6	107	37.974	4.5858	68.971	35.706	4.9414	91.189	31.8	54.649	89.399	8.5404	8.6682	87.966	28.115	0.86796
315	Male	72.91	RS1	156.75	107.2	26.617	24.109	97.571	29.823	128.17	58.838	43.6	58.838	54.932	44.4	115.01	43.087	7.0084	74.314	38.732	5.7592	95.374	33.921	50.685	96.741	16.299	6.4563	95.48	32.666	1.8919
316	Male	63.74	RS1	155.69	95.427	33.463	26.021	87.951	34.92	123.29	63.232	54	62.256	59.326	56.4	112.29	33.794	19.422	75.362	32.289	20.118	95.068	33.774	66.733	92.777	4.8714	30.36	93.064	22.563	15.217
317	Female	64.29	RS1	156.02	106.73	22.809	32.101	101.93	24.567	124.27	67.627	33.2	65.186	65.674	34	112.58	48.393	3.8676	77.309	45.868	4.0072	95.644	43.919	33.718	96.692	28.741	0.90537	95.529	41.04	-1.0684
318	Male	61.99	RS1	155.66	100.65	26.298	21.641	92.178	27.694	119.38	54.932	51.6	57.861	54.932	52.4	108.91	33.062	16.152	68.311	31.88	16.674	89.538	32.195	61.786	90.257	9.2886	20.013	88.494	23.932	9.7691
319	Male	81.8	RS1	154.7	92.108	30.746	27.913	86.707	25.383	125.73	47.119	47.6	61.279	43.701	44.4	113.15	26.816	6.7341	73.451	26.188	6.6723	93.557	20.888	52.034	93.245	2.1052	7.9236	93.379	18.977	0.60034
320	Female	66.06	RS1	149.23	103.18	31.11	27.938	109.48	28.936	116.46	62.256	51.6	54.932	66.162	52.4	103.51	39.649	8.9192	66.991	41.948	9.3413	85.346	39.427	57.29	84.47	16.528	14.259	84.166	33.74	3.6661
321	Male	73.66	RS1	160.58	97.695	32.676	26.903	93.34	31.106	125.73	57.373	59.6	64.209	55.908	58.8	112.95	30.862	19.384	79.519	29.534	19.39	96.859	31.572	69.432	96.666	8.3667	27.509	96.49	22.642	14.716
322	Female	64.04	RS1	151.4	101	32.999	22.115	94.552	35.675	122.31	60.303	54	56.396	58.838	54.8	108.75	38.469	20.689	70.158	36.759	20.661	90.283	37.316	62.057	90.071	16.846	24.72	89.447	31.114	13.907
323	Female	79.77	RS1	157.42	102.88	21.29	21.609	97.498	24.43	124.27	57.373	44.4	57.861	55.908	45.2	106.13	35.627	4.3329	71.04	36.394	5.6345	91.255	32.05	50.907	87.946	14.479	8.2458	87.598	30.265	-0.79409
324	Female	64.45	RS1	157.18	100.29	33.357	34.438	97.643	32.447	126.71	59.326	46.8	64.697	58.838	46.8	116.07	40.777	14.636	75.833	39.662	13.563	95.317	36.471	53.847	96.768	18.779	16.801	96.071	34.159	8.0043
325	Male	64.6	RS1	149.03	90.473	24.694	19.095	101.72	28.323	113.53	52.49	38.8	49.072	55.42	42	94.847	35.588	4.5351	60.223	37.256	4.9224	79.312	34.285	49.481	76.766	10.526	7.0695	77.105	28.062	1.1011
326	Female	63.95	RS1	153.74	121.75	22.163	31.681	113.58	23.37	126.22	76.904	30	65.674	72.021	30	113.84	65.036	5.235	78.127	62.542	5.2056	98.301	48.932	29.727	97.452	44.634	3.4121	96.579	60.715	5.2209
327	Female	73.38	RS1	146.69	100.81	42.475	27.153	101.92	32.747	115.97	64.209	62	51.025	66.162	58.8	103.55	42.226	28.891	68.199	41.991	26.713	82.906	43.713	70.141	84.802	19.301	34.736	85.922	34.988	23.29
328	Male	70.96	RS1	158.39	90.424	39.382	15.324	89.049	40.727	120.36	49.561	69.2	53.955	47.119	69.2	111.97	26.422	31.73	66.416	24.715	31.264	88.982	31.337	83.284	91.406	2.5106	39.758	90.318	16.906	25.732
329	Male	62.33	RS1	158.7	102.63	22.227	19.165	94.576	24.155	120.85	52.002	38.8	60.303	48.096	37.2	111	34.785	6.3421	71.19	32.835	5.7989	91.77	24.362	45.123	93.403	6.1774	7.1614	90.74	25.534	2.6027
330	Male	63.99	RS1	162.89	101.68	27.78	24.089	80.454	34.525	132.57	52.978	56.4	70.557	43.701	62	123.54	29.115	14.893	84.387	18.728	17.811	105.59	23.551	66.995	108.93	2.463	27.039	105.54	16.564	10.239
331	Female	59.07	RS1	146.93	103.43	47.185	22.302	97.312	43.986	119.38	62.256	69.2	52.978	58.838	66.8	104.29	37.32	33.906	71.436	35.038	31.973	87.778	37.031	76.122	90.212	13.595	41.246	87.831	29.24	28.824
332	Male	63.95	RS1	154.24	99.313	30.61	19.181	96.695	26.076	117.43	54.443	45.2	52.49	55.42	43.6	104.53	31.474	4.5475	65.589	31.959	4.1786	84.397	27.132	50.32	86.026	6.3551	5.3449	85.65	24.454	-1.4706
333	Female	61.57	RS1	148.5	116.62	25.025	27.204	116.92	28.609	119.87	73.975	36.4	55.908	74.951	38	105.37	60.731	4.5104	66.729	60.847	4.9642	88.423	46.381	40.716	88.765	37.559	5.7137	86.648	54.294	2.3584
334	Female	63.28	RS1	151.67	112.78	29.568	21.293	115.14	29.681	115.97	68.603	51.6	53.467	69.092	51.6	103.04	52.336	10.084	63.959	52.782	10.115	84.159	48.25	55.454	83.402	29.636	13.717	83.617	47.187	4.3953
335	Male	61.11	RS1	147.89	99.728	20.569	17.106	106.81	31.612	113.04	58.838	40.4	48.584	63.232	44.4	94.895	47.707	3.8902	57.307	51.247	6.3315	80.801	38.628	48.999	73.88	23.536	7.252	75.101	42.827	0.30816
336	Male	62.13	RS1	159.88	96.187	32.22	21.042	92.523	29.003	121.83	51.025	50.8	57.861	50.537	50	112.18	23.862	9.4548	71.443	21.358	9.3876	89.118	20.112	59.86	91.664	0.85214	13.759	91.607	15.405	3.6884
337	Female	61.75	RS1	157.21	113.23	30.917	33.137	104.38	32.006	132.57	66.65	46.8	67.627	61.279	48.4	119.48	47.478	13.643	83.291	44.159	13.364	101.35	46.993	52.652	103.84	27.427	22.072	101.85	40.144	10.286
338	Male	67.3	RS1	157.93	98.234	41.855	22.757	94.884	40.285	123.78	55.42	62	58.35	53.955	60.4	112.22	36.411	25.795	70.982	33.877	24.772	91.492	29.687	70.753	91.792	7.7123	27.664	93.51	26.559	16.526
339	Female	57.27	RS1	152.08	96.501	28.785	26.366	95.072	34.744	120.85	58.35	48.4	62.256	58.35	51.6	107.69	33.964	11.535	70.617	32.79	12.856	91.683	33.45	55.15	90.541	9.761	16.715	88.653	24.968	5.0912
340	Female	73.85	RS1	147.82	88.004	28.053	25.253	95.472	29.038	114.5	53.467	48.4	53.467	57.861	48.4	100.31	33.021	10.232	59.515	36.76	12.272	83.663	32.4	55.576	77.063	11.319	13.543	78.624	28.321	3.4829
341	Male	82.27	RS1	159.72	98.848	39.547	17.941	97.995	31.412	120.36	57.861	60.4	55.42	56.396	57.2	108.7	38.386	15.963	67.821	38.558	12.742	86.645	33.046	67.488	87.383	13.934	15.824	87.687	32.659	5.6529
342	Female	71.02	RS1	158.76	109.06	26.473	30.927	93.094	28.021	131.59	68.115	50	74.951	60.303	51.6	122.66	45.273	12.261	87.162	40.689	12.568	106.24	43.262	59.224	108.76	17.487	15.488	106.5	34.915	6.1936
343	Female	76.73	RS1	151.82	109.62	36.678	38.072	108.4	28.229	119.87	74.951	49.2	65.674	73.486	46.8	112.46	60.676	9.1186	80.717	59.761	7.5144	92.943	52.631	51.799	96.117	38.014	9.502	97.167	54.971	1.6492
344	Male	61.39	RS1	156.95	106.33	29.175	24.533	103.22	30.661	125.73	63.232	46.8	60.303	60.791	47.6	112.23	40.666	5.0624	71.858	38.312	6.0302	93.529	34.895	49.025	93.756	14.304	7.8284	93.506	31.059	0.63852
345	Female	65.67	RS1	149.59	110.18	39.261	32.176	106.82	35.551	125.73	68.603	55.6	60.791	66.65	54	110.37	51.47	15.652	78.702	50.747	15.412	94.046	45.524	61.32	96.428	27.865	16.528	95.709	45.617	8.6557
346	Male	74.07	RS1	152.9	86.799	51.401	20.782	100.58	41.483	115.97	57.373	79.6	51.025	62.744	75.6	101.28	25.587	40.321	60.789	31.585	41.001	81.04	36.19	92.64	74.695	5.709	49.178	79.047	18.789	34.874
347	Male	61.63	RS1	154.2	112.19	18.931	19.207	103.07	21.023	118.9	61.279	33.2	58.838	56.396	35.6	105.94	47.199	3.9877	73.451	43.832	4.5599	91.703	35.076	39.991	92.907	25.144	4.8519	90.428	40.865	2.6467
348	Male	61.08	RS1	156.81	100.18	29.983	26.789	103.82	24.441	122.31	58.838	45.2	58.838	60.303	41.2	109.04	44.039	4.5911	73.97	44.225	4.1498	89.648	34.058	46.242	92.118	19.17	4.6043	92.384	37.033	-0.28358
349	Female	59.77	RS1	144.17	104.85	25.208	24.2	109.6	30.582	112.55	67.139	42.8	52.978	70.068	46.8	98.41	44.95	8.7203	61.063	47.177	10.039	81.968	41.535	50.043	78.912	21.615	11.923	78.911	36.922	2.4013
350	Male	60.2	RS1	154.45	108.34	24.549	22.681	103.43	30.226	122.8	60.791	46.8	58.35	60.303	50	108.26	39.271	8.5513	67.779	37.933	10.742	90.823	35.766	55.838	88.055	12.7	11.829	88.142	30.285	2.5243
351	Male	59.55	RS1	153.91	93.855	27.941	18.88	97.595	34.767	117.92	53.955	54	57.373	55.908	58.8	102.42	26.501	11.924	66.415	28.546	14.23	87.638	27.626	66.256	84.25	2.2086	19.269	83.241	19.452	5.8692
352	Female	64.13	RS1	146.22	99.498	38.491	27.427	107.15	34.581	112.06	59.814	52.4	52.002	64.209	53.2	98.342	41.391	14.842	65.139	42.637	14.403	80.838	39.619	58.203	81.098	20.621	16.834	82.045	35.166	7.998
353	Male	73.39	RS1	153.05	108.07	28.918	27.11	104.77	33.907	123.29	62.256	50.8	60.303	61.768	52.4	108.99	42.802	8.4935	74.062	40.366	9.64	93.074	39.307	59.572	93.389	16.273	11.696	91.918	34.477	2.1536
354	Female	65.01	RS1	153.1	112.67	15.079	21.74	101.02	23.96	122.8	68.115	30.8	61.768	63.232	35.6	109.06	54.29	2.9434	70.379	52.327	4.7261	93.953	38.259	33.839	92.885	31.391	4.1398	89.81	48.654	1.5649
355	Female	61.44	RS1	146.83	109.34	27.336	20.905	112	30.835	112.06	66.162	42	52.002	68.603	44.4	97.24	51.444	4.7241	63.479	52.304	4.7092	81.412	42.458	45.568	79.897	31.211	6.9838	80.017	46.193	2.4537
356	Male	61.21	RS1	151.43	93.084	23.426	23.905	95.354	23.383	118.9	51.025	46.8	53.955	52.49	46.8	106.79	28.003	11.649	65.704	29.322	12.418	86.247	27.596	57.722	86.466	5.1954	19.815	85.283	21.634	8.6335
357	Male	62.1	RS1	150.92	89.247	32.312	20.993	88.271	29.992	115.48	55.42	57.2	52.002	55.908	57.2	102.75	34.567	15.233	65.957	33.199	13.37	83.106	34.454	66.444	85.629	7.693	23.483	85.124	25.07	9.718
358	Female	62.73	RS1	151.51	99.121	29.636	27.927	96.099	28.817	123.29	58.838	46	62.744	55.908	46	110.08	40.328	7.5988	77.653	37.808	6.8667	94.685	34.705	48.976	94.981	17.874	9.9865	93.891	32.626	2.1498
359	Female	74	RS1	141.04	99.327	20.825	22.654	94.415	27.328	112.55	59.814	43.6	55.42	56.885	46.8	99.669	43.525	5.9387	64.139	40.01	8.0056	86.165	36.84	50.367	84.667	19.928	11.287	82.536	34.469	1.8668
360	Female	64.54	RS1	151.27	110.01	29.977	28.876	104.89	27.909	121.34	66.65	44.4	60.303	63.721	42.8	109.89	48.065	7.6429	76.569	45.694	6.8875	92.267	44.04	48.209	96.714	22.649	11.828	94.761	39.936	1.4293
361	Male	64.25	RS1	154.45	97.765	28.972	27.738	99.04	32.28	117.92	55.908	49.2	57.861	57.373	51.6	105.14	38.411	10.331	66.723	39.617	12.117	88.004	34.673	59.978	85.006	12.432	15.076	84.645	29.938	3.4667
362	Male	71.79	RS1	160.19	90.476	36.516	20.959	94.751	25.804	120.36	49.072	54	54.932	49.561	47.6	112.76	33.162	9.974	70.198	33.589	7.6572	88.221	28.312	55.508	91.25	9.8088	10.444	91.412	26.78	2.9332
363	Male	64.03	RS1	149.23	100.43	32.588	18.386	98.903	34.524	113.53	57.861	55.6	52.002	56.396	57.2	100.53	33.758	12.517	63.813	34.415	14.444	82.991	32.407	65.448	81.028	8.015	22.532	80.955	24.782	7.7195
364	Male	60.82	RS1	156.47	91.47	34.731	21.481	94.582	27.647	115.97	47.119	49.2	54.443	48.096	46	107.58	29.179	8.5515	65.497	30.856	7.7854	84.968	19.872	52.81	85.876	1.6451	9.3754	86.83	21.977	1.0853
365	Female	61.61	RS1	154.83	113.33	32.644	32.167	93.152	39.183	129.64	69.58	43.6	69.092	60.303	47.6	117.51	54.339	7.4669	84.303	48.764	8.1129	102.77	42.424	50.41	104.31	29.793	10.218	101.65	46.18	2.0738
366	Male	61.54	RS1	154.8	95.041	24.952	22.606	100.29	23.615	116.94	53.955	42	55.42	56.396	40.4	104.34	38.695	4.8584	68.538	40.086	4.9892	86.513	31.775	50.371	86.147	13.295	7.9469	86.539	32.489	1.5017
367	Female	64.41	RS1	152.17	108.66	22.236	25.57	102.46	22.001	120.36	66.162	38	59.326	63.721	38	107.23	52.402	5.3652	72.69	50.715	4.9789	91.249	40.084	38.964	92.025	32.264	4.0726	90.484	46.248	2.3152
368	Male	66.25	RS1	154.06	97.926	33.459	20.062	102.43	37.21	117.43	54.443	48.4	52.49	56.885	50	107.76	38.288	6.7988	62.449	39.604	7.7386	84.282	30.243	54.73	84.746	10.339	9.222	84.846	31.231	-0.14904
369	Male	62.73	RS1	153.44	85.664	21.148	20.872	86.285	23.894	119.87	38.818	42	51.025	39.307	42.8	102.34	23.034	6.537	62.146	23.574	6.0593	84.513	16.591	49.796	84.638	2.6035	11.691	81.403	16.263	4.6919
370	Male	72.29	RS1	151.92	102.16	27.674	17.058	107.19	28.218	111.57	60.303	49.2	51.025	64.209	50	98.796	44.783	11.708	60.513	46.346	11.618	80.215	44.052	59.369	78.981	20.057	16.442	79.38	37.042	5.1404
371	Male	75.34	RS1	164.49	97.685	34.45	26.816	89.379	22.134	130.13	52.49	52.4	62.744	46.631	46	123.23	27.607	11.792	82.839	22.83	9.1499	97.095	22.131	57.877	102.66	2.1743	13.286	103.71	19.131	3.5221
372	Male	80.72	RS1	154.14	91.877	33.623	19.561	90.517	30.893	116.46	53.955	60.4	53.955	54.932	61.2	103.9	32.093	21.937	65.249	32.555	22.25	85.879	32.556	74.213	86.344	3.374	27.856	84.752	22.708	13.239
373	Male	60.38	RS1	157.89	89.125	24.732	18.661	95.703	24.35	120.85	40.771	40.4	49.561	43.701	41.2	105.11	26.227	4.0943	66.353	28.298	5.1282	85.818	17.852	46.929	84.717	2.2244	6.5688	85.803	19.213	1.8857
374	Female	60.26	RS1	151.18	104.02	35.382	30.152	97.255	38.055	120.36	64.209	56.4	62.256	60.791	57.2	106.23	43.704	15.567	70.503	43.552	16.942	91.149	41.302	63.439	85.504	19.459	22.129	86.8	35.963	11.08
375	Male	71.47	RS1	152.71	92.289	27.806	22.98	96.642	22.137	118.9	52.49	39.6	56.885	52.978	38.8	104.99	38.755	5.1642	69.986	39.438	6.6434	88.625	29.834	49.999	89.408	12.38	10.503	90.636	31.636	3.8966
376	Female	75.48	RS1	152.58	91.871	43.865	25.328	88.592	46.389	121.34	53.955	72.4	59.326	52.978	74	109.02	25.672	35.832	70.104	24.32	36.456	91.24	30.394	81.61	90.246	2.9211	45.349	89.851	15.456	30.254
377	Female	61.52	RS1	148.34	107.03	25.084	24.085	100.09	22.905	121.83	62.256	33.2	57.373	57.861	31.6	109.11	47.614	2.5511	73.467	45.64	2.897	90.558	38.75	35.866	91.908	26.953	-2.3608	91.964	42.079	-1.2065
378	Female	64.07	RS1	146.99	93.681	28.13	19.91	96.625	30.555	115.97	55.908	50	49.561	57.373	51.6	98.903	36.664	10.503	61.77	37.231	11.331	82.025	32.904	57.974	80.426	14.672	15.947	79.761	30.948	5.3008
379	Female	65	RS1	151.28	102.16	30.379	25.374	103.32	28.024	117.92	55.42	38.8	54.932	55.42	37.2	105.16	41.332	5.412	68.053	42.57	5.5962	85.25	28.921	37.873	86.272	21.014	6.0464	86.587	36.955	3.935
380	Male	63.11	RS1	158.77	100.02	33.21	22.448	92.276	40.952	127.2	51.514	60.4	58.35	50.049	64.4	112.96	30.113	22.325	72.306	27.285	23.362	94.753	31.039	71.589	94.61	3.2992	29.165	93.752	20.152	17.174
381	Female	62.06	RS1	148.29	108.34	45.785	23.673	98.634	44.948	118.9	68.603	66.8	57.861	63.721	66.8	110.75	45.645	28.392	71.541	41.497	27.665	89.501	48.724	72.695	93.821	20.126	34.761	92.631	35.489	22.33
382	Female	63.85	RS1	146.93	107.88	30.093	27.494	117.74	32.527	112.55	69.58	43.6	56.396	74.951	45.2	99.821	57.925	5.4619	65.976	61.54	5.0034	83.293	49.812	47.639	81.872	40.026	5.3512	82.605	53.77	2.3823
383	Male	61.12	RS1	158.43	103.09	27.865	28.535	95.791	23.83	129.15	55.908	43.6	62.256	52.49	42.8	116.6	35.955	6.2128	78.335	34.224	6.47	95.621	26.12	46.54	98.324	7.712	8.3985	98.577	26.434	3.3921
384	Female	74.91	RS1	145.68	93.906	41.331	24.317	105.51	36.287	111.57	60.791	63.6	48.096	66.65	62	97.242	41.734	30.573	58.58	43.718	28.436	76.831	41.581	73.324	75.988	19.158	33.059	77.185	36.294	22.504
385	Female	67.88	RS1	152.43	116.02	36.294	33.35	109.52	26.065	126.71	71.045	44.4	66.162	68.115	38	118.34	61.518	7.0123	81.85	59.432	5.3348	97.889	46.356	43.746	103.1	39.797	4.9912	102.33	55.832	3.1577
386	Female	63.12	RS1	149.87	112.89	27.282	23.557	118.31	30.568	115.97	73.975	44.4	53.955	76.416	46	97.565	54.304	5.8161	62.684	56.115	6.6343	82.472	51.792	47.452	77.376	31.633	9.1495	78.707	48.412	0.31524
387	Male	62.07	RS1	151.48	83.719	35.798	22.291	91.478	29.025	114.5	48.584	60.4	52.49	52.49	56.4	105.22	27.498	16.975	62.443	30.517	15.177	81.82	30.5	65.55	83.258	3.4974	22.347	84.529	19.269	10.15
388	Female	69.39	RS1	158.45	107.06	30.131	33.318	102.43	22.495	128.66	60.303	37.2	67.139	57.861	33.2	123.36	51.468	3.3227	80.864	49.938	2.5524	99.589	35.675	37.319	102.55	33.187	2.0601	103.25	48.354	0.79703
389	Male	63.28	RS1	154.57	100.63	30.736	21.269	104.55	37.23	119.87	61.279	58	55.42	64.209	60.4	104.19	37.774	19.962	65.734	38.988	22.648	87.446	43.035	67.997	83.727	15.094	28.129	85.293	30.402	15.685
390	Male	61.03	RS1	158.75	95.303	22.633	23.085	89.741	27.227	127.69	51.025	41.2	58.838	50.537	43.6	109.03	33.735	5.4693	72.773	34.815	5.5825	94.082	24.55	51.262	93.36	6.4533	10.551	90.91	27.083	0.90111
391	Male	63.99	RS1	148.73	93.898	21.753	16.416	96.122	31.695	113.53	52.002	37.2	52.978	52.978	44.4	99.832	33.856	4.1458	59.312	34.834	6.3252	83.691	30.201	47.997	80.873	7.872	7.5708	79.628	25.722	-1.3497
392	Female	61.5	RS1	147.7	88.987	38.485	24.902	101.67	37.93	111.08	57.373	58.8	52.002	66.162	58	94.507	35.472	23.048	62.359	39.883	22.408	78.279	38.009	67.448	74.122	15.436	28.682	76.759	29.608	16.09
393	Female	61.16	RS1	150.08	108.36	33.672	27.86	110.41	29.871	120.85	65.186	38.8	55.908	64.209	38	103.58	51.877	5.7644	70.066	52.369	5.2702	88.42	46.523	41.96	86.1	31.001	6.3394	86.782	45.504	2.6591
394	Male	58.42	RS1	156.73	106.62	29.224	25.909	94.885	35.845	126.71	63.232	52.4	63.721	58.838	55.6	115.27	37.558	12.875	73.815	33.997	13.649	97.83	32.972	61.853	97.503	6.9425	17.992	94.899	26.118	6.162
395	Male	63.05	RS1	161.06	101.67	43.31	31.36	91.144	33.878	127.69	59.326	67.6	69.092	53.467	62	122.33	37.171	24.446	86.169	33.631	20.186	99.366	36.384	75.017	105.17	7.857	31.11	106.11	25.57	15.628
396	Male	78.33	RS1	154.37	89.662	37.061	20.301	94.643	35.365	117.43	50.049	69.2	52.002	52.49	69.2	105.44	28.801	36.335	61.647	28.151	34.182	83.687	33.364	81.212	86.812	5.5886	43.779	83.929	20.135	29.063
397	Male	70.88	RS1	145.05	102.09	23.513	20.228	112.88	26.542	110.11	60.791	39.6	47.119	67.627	42	92.737	41.14	5.0412	57.1	44.17	5.1256	75.665	36.132	39.663	73.851	20.064	3.6983	74.843	35.006	2.3943
398	Female	77.49	RS1	148.12	106	32.085	19.884	110.54	30.792	115.48	68.115	49.2	49.561	69.58	49.2	98.807	50.284	8.341	65.155	50.9	8.7979	82.804	46.757	53.471	81.454	32.461	13.153	82.218	46.909	4.2741
399	Male	63.01	RS1	162.43	92.491	27.482	19.791	94.83	27.57	126.71	55.908	52.4	56.885	56.396	51.6	112.93	30.426	13.818	70.539	30.715	13.091	91.762	30.334	63.098	89.921	2.1668	19.386	91.167	20.388	6.3563
400	Male	62.35	RS1	159.5	111.63	32.768	26.091	107.57	26.146	124.27	67.139	49.2	64.209	65.674	46	116.67	48.086	9.5245	75.852	46.759	9.1812	93.169	43.169	54.189	94.586	22.853	11.244	97.189	40.116	2.9947
401	Male	62.41	RS1	154.49	104.15	30.106	20.619	107.38	33.807	117.43	66.162	50.8	54.443	67.139	52.4	100.3	49.526	7.8872	65.553	50.079	9.2124	85.849	46.718	60.087	83.087	23.778	13.983	81.653	41.613	3.3675
402	Female	71.45	RS1	150.29	106.87	28.3	24.998	104.17	41.82	120.85	62.744	50	59.814	62.256	57.2	105.4	46.868	13.601	67.854	45.344	17.591	90.991	42.044	63.856	87.861	21.78	18.985	85.683	38.843	9.4838
403	Male	62.39	RS1	156.8	88.065	32.71	14.709	86.003	36.211	118.41	47.607	56.4	54.443	47.607	59.6	106.11	22.232	23.905	65.435	21.463	25.691	87.733	30.46	68.017	86.852	2.4336	33.499	85.841	13.16	18.518
404	Male	80.36	RS1	153.72	94.707	26.412	24.099	105.21	30.687	115.48	56.396	52.4	53.955	61.768	55.6	100.29	35.69	18.954	61.291	39.608	18.981	82.303	37.971	64.737	77.191	10.172	25.916	79.22	29.201	12.546
405	Male	80.59	RS1	157.43	90.362	40.928	23.859	110.4	22.809	112.55	51.514	50	52.49	58.35	42	104.86	37.482	8.259	67.73	42.752	5.7605	79	34.073	51.18	82.342	15.017	10.153	85.642	32.251	2.633
406	Female	61.37	RS1	151.14	101.96	33.145	25.022	102.11	31.782	117.92	54.443	54	57.861	54.443	52.4	107.48	34.864	20.775	69.754	34.036	19.692	87.924	35.079	59.047	88.779	12.325	27.365	88.877	26.433	15.93
407	Male	66.59	RS1	159.38	104.84	22.861	22.908	102.11	26.537	125.73	62.256	44.4	60.303	62.256	46	111.14	36.685	7.6255	70.369	34.794	8.6952	93.792	37.637	55.759	92.588	8.5361	14.186	91.516	26.328	0.65966
408	Female	63.61	RS1	154.03	109.87	17.934	20.922	102.48	23.921	123.78	60.791	35.6	55.908	56.396	38.8	105.84	46.684	5.4475	70.382	44.261	5.1706	91.501	37.949	39.998	90.482	24.334	4.2708	88.217	39.481	3.0706
409	Female	73.72	RS1	143.88	111	21.909	22.217	106.94	21.797	114.5	67.627	36.4	54.932	65.674	36.4	101.01	46.801	3.6411	68.127	46.673	2.7437	86.36	42.063	44.033	85.857	24.78	4.3792	85.857	39.292	0.043937
410	Male	63.08	RS1	154.84	108.42	25.671	30.617	93.645	29.359	131.59	63.232	47.6	65.186	56.885	50	117.63	39.263	8.0054	80.121	35.129	8.8714	101.98	34.614	56.455	102.32	12.449	13.799	99.926	28.496	2.5449
411	Male	61.16	RS1	146.44	87.354	23.472	24.233	100.74	31.174	114.99	50.049	42.8	52.002	55.42	48.4	97.729	32.211	7.7082	62.532	34.587	9.5875	81.764	29.083	54.341	79.016	8.1879	12.935	78.82	25.05	3.812
412	Male	61.48	RS1	155.47	107.63	28.033	19.353	104.85	34.015	124.76	63.721	47.6	56.885	61.768	50.8	107.03	48.424	9.0534	68.482	47.464	10.435	91.35	39.766	59.092	86.775	20.608	12.75	87.449	41.489	4.018
413	Male	63.55	RS1	151.21	103.53	29.367	24.017	92.575	28.876	120.85	59.326	52.4	59.814	53.955	54	111.54	37.793	11.904	72.052	31.67	11.65	91.154	34.289	62.563	95.407	8.0799	16.777	93.449	27.009	5.4791
414	Male	64.25	RS1	148.79	88.479	38.568	19.636	94.9	36.29	113.53	50.049	62	49.561	54.443	61.2	101.65	34.274	19.821	60.694	35.842	17.756	80.007	28.584	71.2	82.175	7.4674	25.885	81.07	26.32	12.802
415	Male	64.52	RS1	155.04	100.64	25.774	18.023	90.585	32.048	124.27	52.978	47.6	54.443	50.049	52.4	107.17	33.067	8.1874	65.086	30.597	9.5721	90.925	28.158	59.656	88.553	3.3984	12.844	86.169	22.569	2.706
416	Female	61.41	RS1	155.25	109.65	33.034	30.811	105.03	36.438	124.27	68.115	50	64.697	67.627	51.6	111.67	50.44	10.791	76.936	48.6	11.318	95.487	42.864	54.314	97.188	25.553	14.742	95.3	42.169	5.7136
417	Female	69.14	RS1	147.19	108.13	30.104	22.97	108.56	33.86	117.43	72.021	43.6	54.932	71.045	46	100.9	54.092	5.1292	67.768	52.965	6.8243	86.391	47.899	47.525	85.443	31.272	5.5681	84.406	47.825	-1.6481
418	Male	70.29	RS1	152.59	89.854	40.139	19.192	99.218	30.266	112.06	52.49	64.4	46.631	57.861	60.4	98.748	23.843	23.915	58.386	26.034	20.62	77.111	26.389	73.156	76.778	1.882	30.695	77.822	16.45	14.307
419	Female	61.65	RS1	157.46	101.95	34.122	34.848	100.81	20.079	124.76	60.303	45.2	64.209	58.838	37.2	116.37	44.086	5.1395	81.887	44.167	3.082	94.794	37.133	45.079	98.487	20.859	4.2769	99.385	37.159	-0.92997
420	Male	63.71	RS1	153.14	82.925	42.313	26.953	91.825	33.929	113.53	49.072	65.2	55.908	52.002	62	102.58	26.001	27.452	65.151	28.922	25.875	83.492	32.988	73.37	82.292	4.0278	34.422	83.489	17.48	20.106
421	Female	81.09	RS1	144.3	99.485	39.805	26.059	101.32	42.098	115.48	59.814	62	54.443	62.256	63.6	102.98	37.029	27.522	64.566	37.957	29.201	85.065	36.091	71.435	83.33	16.443	32.284	84.027	30.952	21.159
422	Female	60.19	RS1	148.19	113.16	23.436	25.381	114.96	21.988	114.5	68.603	36.4	55.42	70.557	36.4	101.6	56.153	5.349	68.184	57.887	5.8722	84.702	46.603	38.082	83.778	39.005	5.3025	84.602	52.784	2.8222
423	Female	64.03	RS1	155.6	105	28.283	31.64	100.16	29.204	124.27	64.209	46.8	67.139	62.256	47.6	113.55	45.197	8.2716	79.763	42.857	8.4902	97.199	41.065	53.141	98.52	20.603	11.431	97.259	37.139	2.6606
424	Female	63.05	RS1	152.63	91.637	35.802	25.901	99.566	32.349	119.87	53.467	50.8	56.396	56.885	48.4	104.05	34.142	9.8171	68.351	36.349	9.7165	85.887	29.037	55.727	85.607	11.686	14.507	86.125	28.773	4.4396
425	Male	80.08	RS1	157.84	92.63	36.624	20.316	91.502	32.218	122.8	63.721	65.2	59.814	60.791	63.6	112.12	29.658	25.494	74.809	28.608	23.463	92.232	35.656	73.709	93.143	3.4538	30.053	94.482	21.129	15.756
426	Male	61.64	RS1	152.8	108.08	21.611	17.903	114.11	19.685	112.55	63.721	30.8	52.002	65.674	30.8	97.732	54.036	7.6265	66.074	55.853	5.967	80.165	41.31	36.515	79.756	32.538	4.8493	82.731	51.286	4.1015
427	Female	59.67	RS1	149.14	103.6	33.783	26.403	108.26	34.095	119.87	63.721	54	53.467	65.674	55.6	102.37	38.437	16.254	68.785	39.371	15.986	87.352	38.046	59.591	86.14	14.218	20.774	86.022	31.884	10.65
428	Male	62.04	RS1	155.79	96.117	26.174	27.622	99.543	24.944	124.27	52.002	40.4	59.326	52.978	40.4	108.42	35.317	5.5038	72.578	35.504	5.2577	91.045	28.973	48.232	92.286	7.9705	6.5901	90.252	26.411	1.5434
429	Male	62.73	RS1	160.29	108.66	27.951	25.118	96.489	37.029	127.2	61.279	50	64.209	55.42	53.2	114.59	37.694	12.653	74.486	35.598	15.35	97.436	36.216	63.223	95.01	9.9521	20.011	95.073	26.589	7.7265
430	Female	63.67	RS1	153.64	108.73	19.477	24.248	106.15	20.294	122.8	67.139	39.6	60.791	65.186	40.4	104.73	46.038	4.828	73.626	45.78	4.9368	91.501	43.559	44.365	88.539	25.469	5.0525	89.002	38.425	1.6084
431	Female	63.88	RS1	152.05	99.174	37.571	27.167	101.27	31.507	116.94	57.373	56.4	58.35	58.35	53.2	106.32	39.634	12.422	69.174	39.409	11.872	86.847	36.236	60.602	85.973	18.361	16.324	88.067	34.487	4.6444
432	Female	64.49	RS1	151.66	97.844	20.188	30.005	91.305	25.333	120.85	54.443	29.2	64.209	52.002	32.4	108.55	41.693	3.4454	75.509	39.82	4.2547	93.522	34.608	33.492	93.968	23.701	0.72246	92.836	36.489	1.7973
433	Female	66.52	RS1	151.73	112.01	28.302	24.806	100.52	31.588	122.31	64.209	45.2	61.279	58.35	47.6	110.62	46.157	8.9554	75.168	42.627	9.4362	94.611	38.087	53.303	94.789	23.574	12.657	93.197	39.425	2.9472
434	Male	61.96	RS1	155.71	92.544	17.649	21.34	91.782	22.836	118.9	48.096	32.4	56.885	46.631	34.8	103.21	32.452	3.7814	67.229	32.888	4.3658	87.899	20.044	36.323	85.648	4.9536	4.6222	83.842	26.518	0.74298
435	Male	61.4	RS1	155.93	103.19	28.882	20.02	98.418	31.045	123.29	58.838	52.4	55.42	56.885	53.2	108.54	39.708	12.962	66.029	37.927	12.576	90.501	33.732	62.739	88.925	14.333	14.92	87.107	31.883	6.0686
436	Male	64.18	RS1	152.91	101.43	21.218	23.63	96.215	23.529	121.34	57.861	37.2	57.373	54.443	38.8	109.86	36.019	5.2324	68.795	32.789	4.8683	91.29	31.316	43.466	92.026	10.12	7.0885	90.965	24.779	3.6158
437	Female	61.11	RS1	147.55	96.692	28.783	24.64	92.117	28.559	117.43	55.42	41.2	58.35	53.467	41.2	104.94	40.087	3.9414	70.765	40.092	4.5314	88.448	31.555	44.009	86.943	21.015	5.8004	88.38	34.81	1.7064
438	Female	62.79	RS1	152.15	109.75	37.08	27.424	111	37.692	120.85	65.674	51.6	58.35	66.162	54	104.8	48.926	13.176	70.315	50.429	13.981	89.091	43.36	59.578	87.246	26.478	17.864	86.642	43.613	7.2809
439	Male	61.24	RS1	158.89	113.68	17.185	21.771	96.142	28.236	128.66	67.627	38	64.697	59.814	42.8	110.86	46.008	4.4945	76.523	39.684	4.897	99.346	37.2	47.156	99.296	13.877	10.277	94.416	36.268	0.76315
440	Male	70.64	RS1	153.21	97.297	17.738	19.479	90.541	21.338	122.31	46.631	38	58.35	45.166	39.6	108.59	26.663	6.9316	70.297	26.55	6.2014	90.927	21.438	47.995	89.644	1.2957	7.9218	88.703	18.044	3.4078
441	Male	60.75	RS1	157.9	91.981	36.331	21.915	90.774	28.413	120.85	50.537	56.4	55.42	50.049	51.6	109.61	28.172	16.781	71.347	27.816	13.779	89.314	25.186	63.135	90.422	2.7968	21.54	91.649	20.088	8.3637
442	Male	63.79	RS1	156.09	103.44	31.869	25.303	96.731	33.618	126.22	55.908	53.2	62.744	51.514	54.8	114.55	35.152	11.844	73.874	32.699	14.144	96.277	31.426	60.87	95.525	7.6776	19.108	94.1	25.288	7.2601
443	Female	62.14	RS1	155.62	90.148	36.213	29.819	91.573	33.401	121.83	51.514	52.4	60.791	53.467	50.8	109.64	29.945	13.714	73.95	29.645	14.979	90.314	30.25	58.291	91.656	8.2209	20.592	92.195	23.232	10.331
444	Female	61.66	RS1	145.99	94.534	26.132	25.77	93.072	25.271	114.99	57.373	38	58.838	55.42	38.8	104.52	40.186	4.9316	71.271	39.195	4.8883	87.741	32.619	41.694	89.66	18.845	6.8872	89.929	33.663	2.5588
445	Female	62.87	RS1	153.67	98.933	31.581	24.781	101.27	30.577	117.92	64.697	45.2	58.838	65.186	45.2	105.5	47.667	5.6211	72.095	48.422	5.2626	88.473	39.35	43.727	88.416	28.093	4.0499	89.129	43.449	-1.0905
446	Male	72.3	RS1	156.41	110.23	23.82	27.815	95.176	23.948	126.22	73.975	46	66.65	65.674	46	118.37	54.53	5.2612	82.661	49.046	4.7317	99.725	46.372	54.068	107.47	25.398	9.9468	103.18	44.919	0.40043
447	Female	72.99	RS1	147.21	114.66	31.052	21.599	101.53	33.726	119.87	74.463	46	56.396	68.115	47.6	105.65	57.937	5.3381	73.796	55.001	5.8259	90.219	48.83	50.568	91.692	34.55	7.8768	90.98	51.104	-0.87762
448	Female	62.21	RS1	149.9	117.48	21.508	28.603	104.59	23.365	122.31	71.045	30.8	65.186	64.697	33.2	112.84	55.709	2.0531	76.234	51.059	3.3584	97.839	43.059	32.871	98.918	32.309	1.0482	95.854	50.785	0.11984
449	Male	74.75	RS1	160.08	99.345	27.806	25.721	93.676	23.402	126.71	52.002	39.6	60.303	50.049	38	112.63	37.322	5.7236	78.501	36.075	5.3303	95.515	28.995	46.587	99.12	13.125	7.4596	96.403	29.111	2.52
450	Female	87.16	RS1	147.4	106.73	35.771	23.3	94.126	32.48	118.41	67.627	60.4	57.861	62.256	58.8	107.89	48.562	20.82	74.215	44.935	19.958	90.87	41.443	68.939	93.412	22.186	23.5	91.148	40.792	12.771
451	Female	68.37	RS1	151.41	106.47	28.11	29.16	103.88	25.768	119.87	64.209	34.8	61.279	62.744	34	109.53	52.364	5.9902	74.777	51.553	5.7582	90.996	39.755	36.414	92.456	33.219	4.4523	92.478	46.659	4.2403
452	Male	84.12	RS1	157.58	109.52	25.374	25.362	100.04	29.823	128.66	57.861	46	63.721	54.932	48.4	114.54	40.38	10.765	75.899	37.253	10.976	96.979	33.401	55.747	95.752	12.644	11.595	95.21	31.257	1.9646
453	Male	61.45	RS1	158.06	106.77	25.379	26.827	90.028	26.743	129.15	54.932	40.4	65.674	48.096	40.4	118.42	33.059	6.2612	81.289	27.504	5.1895	99.59	29.137	52.595	104.16	3.7749	8.538	101.31	20.776	2.7104
454	Female	62.88	RS1	158.63	105.79	32.448	40.884	93.825	15.606	130.62	63.232	42	74.951	55.908	33.2	126.39	50.11	3.8014	91.954	45.635	4.2206	103.45	37.702	41.05	108.72	26.433	4.129	110.56	42.5	1.7539
455	Female	63.43	RS1	158.64	110.42	18.499	25.011	104.75	19.557	128.66	61.279	29.2	60.303	57.373	27.6	114.86	51.919	2.062	75.71	50.551	1.8893	94.669	43.106	35.366	95.427	32.236	-1.9801	95.496	49.325	1.5938
456	Female	62.96	RS1	152.01	111.25	32.892	29.822	102.59	34.125	122.31	71.045	51.6	62.256	67.627	54.8	112.16	52.033	11.032	73.761	47.946	14.251	95.326	48.501	57.622	95.321	27.943	17.691	93.149	43.629	5.5905
457	Male	59.9	RS1	155.81	102.49	28.916	21.849	100.97	26.464	125.24	53.955	38	53.955	52.49	38	110	39.362	3.7529	69.935	36.955	3.6924	90.634	29.767	40.234	89.806	14.644	3.6761	89.684	32.205	0.056482
458	Female	74.81	RS1	142.96	86.528	31.735	25.2	96.527	28.695	110.6	52.49	53.2	48.584	57.861	51.6	96.258	31.576	16.424	62.769	33.883	16.622	78.129	29.346	58.232	78.1	11.533	20.707	80.084	26.165	9.7308
459	Male	63.56	RS1	156.39	89.526	21.171	19.138	97.895	19.966	118.9	45.166	31.6	49.561	50.537	33.2	101.38	32.24	6.4249	65.37	36.115	5.6749	84.053	21.58	36.64	83.475	7.0411	5.5476	84.969	28.458	3.6519
460	Male	63.57	RS1	154.31	97.632	29.107	19.893	94.575	29.171	116.94	59.326	53.2	55.908	58.838	54	108.21	36.801	12.724	66.519	35.817	12.847	87.237	32.376	59.707	88.539	7.7981	21.103	87.889	26.449	8.0965
461	Male	63.35	RS1	155.9	89.715	23.025	20.211	97.013	21.341	116.94	47.607	35.6	52.002	49.561	34	103.62	31.517	5.4104	64.207	34.408	6.7472	82.501	21.702	41.024	80.724	5.3976	7.2016	83.963	26.457	3.153
462	Female	63.45	RS1	147.95	107.29	38.951	26.286	104.1	32.502	116.46	68.603	46	57.373	67.139	42.8	103.77	54.557	6.3613	72.745	53.951	5.4768	87.644	43.287	51.16	87.792	31.88	6.3045	87.598	48.393	-0.27599
463	Female	71.95	RS1	159.55	90.15	47.663	27.438	86.694	36.661	127.2	58.35	79.6	58.838	56.885	74	117.76	25.128	43.881	73.232	24.344	41.5	92.932	37.642	87.325	93.908	3.7317	49.885	95.819	16.302	34.944
464	Female	79.44	RS1	151.07	88.414	30.611	23.546	99.25	25.435	114.01	54.932	42.8	52.002	60.303	39.6	99.438	41.632	3.5703	68	42.96	3.6998	80.745	34.155	46.056	82.668	17.24	5.9791	84.805	34.958	0.49537
465	Male	63.69	RS1	151.77	103.19	43.646	22.774	100.56	37.939	114.5	64.697	66	56.885	65.186	64.4	106.96	38.58	32.346	69.5	37.802	30.538	86.387	40.968	76.518	89.245	15.59	39.102	87.983	29.293	26.005
466	Female	70.14	RS1	157.55	92.219	38.047	36.159	87.065	25.627	125.24	53.955	50.8	70.068	50.049	45.2	118.67	35.417	10.791	84.105	33.654	7.3141	98.57	25.197	54.116	102.23	11.212	9.728	102.52	29.784	1.9013
467	Female	75.77	RS1	151.3	99.822	30.485	25.596	96.322	30.693	119.38	58.35	43.6	60.303	56.885	42.8	108.33	39.228	3.3531	72.485	38.128	2.9267	90.529	31.661	46.211	91.738	14.545	4.7262	90.282	31.42	-1.3712
468	Male	63.65	RS1	150.81	100.32	20.264	18.95	105.72	21.683	116.46	48.584	32.4	49.561	52.49	34	100.55	36.798	3.4293	62.361	37.372	2.1862	81.935	22.792	38.036	82.056	14.23	3.5729	80.997	33.631	1.1129
469	Female	63.37	RS1	149.58	105.39	23.73	26.061	111.01	26.736	116.94	62.744	42.8	57.373	65.186	44.4	101.5	42.119	8.4114	70.435	45.047	8.2172	87.087	37.893	49.598	86.11	21.086	12.526	85.915	36.847	3.3905
470	Male	62.16	RS1	158.33	109.38	40.33	26.906	94.824	38.611	126.22	66.65	54.8	66.162	61.279	53.2	121.15	46.889	14.847	76.104	42.131	12.716	97.72	42.242	57.927	100.17	20.836	15.98	100.02	36.639	6.27
471	Male	65.16	RS1	158.87	112	24.78	23.037	105.79	19.883	122.8	64.697	40.4	57.861	62.256	37.2	113.77	46.798	3.5644	75.319	45.276	4.0334	91.181	36.212	44.017	96.808	19.514	5.6566	96.864	38.447	0.52662
472	Female	62.22	RS1	153.21	99.155	26.676	35.81	111	21.691	121.83	62.744	37.2	59.814	69.092	34	106.04	52.999	-0.4942	72.114	57.288	-1.1323	88.587	39.962	38.134	86.64	29.874	3.3239	88.924	49.409	-4.0138
473	Male	79.13	RS1	146.44	106.73	23.524	23.404	106	30.929	118.9	61.768	48.4	53.955	61.279	53.2	99.128	37.813	10.143	61.867	39.896	14.849	86.539	34.896	59.258	79.803	10.184	17.624	77.455	29.561	6.4316
474	Male	68.99	RS1	155.68	104.05	21.451	25.638	98.156	26.96	126.22	69.58	47.6	63.232	66.162	50.8	113.23	47.419	7.1579	74.636	44.12	7.9069	96.95	40.071	56.712	96.436	18.389	10.686	94.201	37.458	2.3331
475	Female	59.96	RS1	149.49	103.56	24.313	31.675	103.01	25.332	117.92	62.256	41.2	61.279	61.768	42.8	107.93	45.184	7.2105	70.676	42.884	8.0116	89.729	38.305	44.11	92.59	20.349	8.8106	90.603	37.707	2.3029
476	Male	64.93	RS1	160.97	104.05	26.92	23.103	99.988	29.365	126.22	56.885	41.2	63.721	54.443	42.8	110.37	39.225	4.1781	74.438	39.065	5.3643	95.338	35.034	48.709	90.995	16.035	7.0484	92.118	30.706	1.9795
477	Male	61.74	RS1	158.15	84.341	37.041	22.666	98.709	29.969	117.43	46.631	55.6	51.025	53.955	50.8	105.58	31.116	13.363	65.966	34.162	10.271	80.943	25.582	60.629	85.259	5.7396	12.009	86.058	24.952	4.6456
478	Female	62.07	RS1	152.59	109.85	27.601	30.895	92.899	36.833	127.2	60.791	42	68.603	53.955	47.6	114.65	44.126	6.7909	79.194	38.611	7.9266	100.34	36.568	48.839	100.27	20.321	7.4891	97.316	36.492	0.39362
479	Female	70.32	RS1	149.01	108.3	32.951	25.658	107.39	33.533	117.43	73.486	50.8	57.861	72.021	51.6	105.06	53.217	12.498	71.748	51.897	12.548	87.998	44.746	55.444	90.235	27.835	12.907	89.227	45.337	4.5421
480	Female	63.95	RS1	151.58	113.99	33.304	27.333	102.38	41.663	121.83	71.533	59.6	61.279	67.139	64.4	108.79	48.872	24.672	74.578	44.026	27.47	94.221	49.44	68.538	94.837	27.182	31.467	92.992	40.668	20.07
481	Male	64.9	RS1	156.83	93.639	19.545	19.461	102.03	21.29	121.83	53.955	46	52.49	58.35	46.8	104.36	31.651	8.8997	62.036	34.554	8.9717	84.813	31.743	59.657	81.827	4.5519	15.771	81.213	23.53	4.2316
482	Male	74.05	RS1	160.01	98.586	32.273	21.214	102.95	32.304	123.29	52.978	50	53.955	52.978	50	107.52	32.413	6.1631	69.254	33.839	6.6285	87.427	27.166	55.574	87.35	8.0397	7.807	88.48	26.173	-0.29895
483	Female	75.68	RS1	156.43	108.24	29.906	30.214	98.612	27.602	128.66	66.162	42.8	63.721	62.256	42	116.56	47.285	6.4338	82.706	44.942	5.391	97.456	40.533	46.47	101.11	25.129	7.8255	100.38	39.764	0.88095
484	Female	66.97	RS1	145.69	100.94	31.648	28.339	101.75	40.415	115.97	71.533	59.6	60.303	72.021	64.4	100.64	43.83	23.772	67.362	44.089	27.251	87.705	46.869	69.609	83.925	22.948	31.765	82.896	35.721	21.024
485	Male	81.36	RS1	145.52	103.35	32.376	17.279	104.21	42.04	114.99	64.209	60.4	48.584	62.744	63.6	99.555	41.865	20.033	59.56	41.939	22.003	82.359	39.245	72.982	78.353	13.145	26.348	78.89	32.405	13.458
486	Male	60.89	RS1	147.42	85.953	29.707	17.071	95.803	35.391	112.06	48.096	51.6	48.584	52.49	55.6	94.818	26.999	12.079	56.641	29.983	13.095	78.069	21.46	60.11	74.864	2.7948	13.427	74.338	19.444	5.1469
487	Female	67.23	RS1	151.15	110.73	20.256	24.949	111.53	20.928	121.34	66.65	31.6	57.373	66.162	31.6	108.18	53.038	4.5413	69.668	52.959	4.5299	90.275	37.311	31.638	89.389	33.714	3.5101	90.106	51.92	3.5266
488	Male	62.06	RS1	157.46	90.61	27.743	17.852	88.549	31.787	124.27	49.072	50	53.955	49.072	53.2	109.15	29.932	7.8935	69.817	28.934	8.6602	90.581	23.962	59.312	91.346	2.5219	11.508	89.331	22.462	1.4754
489	Female	63.52	RS1	155.57	105.27	16.244	33.762	111.7	18.266	123.78	62.744	23.6	60.303	65.674	25.2	107.21	54.85	1.6148	71.081	55.784	0.77826	89.927	42.445	30.431	87.074	34.474	-1.0896	88.404	52.145	-1.0813
490	Female	71.2	RS1	149.92	82.43	38.163	22.306	93.049	35.785	110.11	44.678	60.4	49.561	50.537	59.6	97.234	23.735	23.243	59.073	27.784	23.105	77.423	28.191	71.246	75.864	3.3374	32.383	77.358	18.067	18.651
491	Female	67.25	RS1	152.96	109.73	31.629	32.689	107.96	29.285	121.83	68.603	44.4	62.744	68.603	44.4	110.5	52.095	7.6522	75.282	50.216	8.1406	91.662	46.996	48.492	93.128	30.417	10.097	92.92	44.682	2.5253
492	Male	61.47	RS1	156.33	107.27	32.959	23.684	102.05	31.301	124.27	60.791	48.4	61.279	57.373	48.4	116.04	43.602	12.12	72.374	40.361	11.412	94.336	35.042	55.214	95.433	15.814	13.925	94.682	33.666	4.5997
493	Female	61.22	RS1	150.55	98.98	39.311	24.294	107.28	30.913	118.41	58.838	51.6	50.537	61.768	48.4	106.28	39.821	12.848	66.377	42.322	11.424	83.63	38.187	57.28	83.395	15.07	12.799	85.18	33.267	3.1853
494	Female	63.57	RS1	151.66	106.38	23.236	24.713	98.787	21.923	122.8	59.326	37.2	56.885	55.42	36.4	110.37	43.955	4.7947	71.576	41.966	4.9433	91.961	30.231	38.677	93.842	24.461	3.2372	91.668	38.241	2.211
495	Male	69.9	RS1	157.93	100.52	26.944	26.134	100.12	19.581	124.76	54.932	38.8	58.35	53.467	36.4	112.55	41.148	5.8388	74.188	39.167	4.9408	90.819	29.072	42.655	91.569	15.332	6.1335	93.918	34.848	2.771
496	Female	65.07	RS1	147.44	100.55	34.299	28.012	113.32	29.774	113.04	61.768	42.8	53.955	66.65	42.8	100.77	49.819	6.5494	65.223	53.295	7.3981	83.042	43.061	44.966	80.795	31.532	6.6846	82.549	46.173	3.8378
497	Female	71.19	RS1	153.24	92.151	48.239	25.836	103.04	41.111	115.48	59.814	66	55.42	65.674	61.2	101.99	40.086	27.267	66.96	42.586	24.38	81.89	39.936	69.708	81.925	19.369	28.851	84.324	34.869	18.375
498	Male	64.58	RS1	154.27	103.37	24.267	22.696	90.836	26.908	121.83	65.186	44.4	60.791	59.326	46.8	109.96	36.812	6.2765	74.395	35.584	6.1562	93.819	33.511	49.616	93.148	9.5472	8.0261	92.906	27.591	0.70621
499	Male	63.86	RS1	159.39	101.67	22.111	21.559	90.018	22.102	125.73	54.443	39.6	63.232	48.584	38.8	115.33	30.714	6.4556	76.65	28.646	5.1409	96.452	27.987	46.216	97.754	2.2124	8.1739	95.671	21.465	1.021
500	Female	62.9	RS1	150.84	105.42	25.155	22.703	110.69	26.406	115.97	65.674	34	54.443	69.092	34	104.72	55.224	4.8319	64.631	58.086	5.3105	84.112	42.334	35.52	83.924	37.604	4.6116	84.624	52.806	3.246
501	Female	80.66	RS1	156.17	112.9	40.514	24.119	111.24	36.768	122.8	70.557	58.8	58.838	69.092	58.8	108.19	50.969	20.241	74.348	50.041	18.413	90.986	45.436	64.08	91.368	29.662	22.937	91.062	46.092	12.903
502	Male	66.36	RS1	157.63	99.877	34.3	20.085	99.303	33.406	119.87	59.814	55.6	57.373	59.814	55.6	106.91	35.751	15.958	73.2	35.128	14.731	89.235	33.221	64.922	91.222	9.8679	22.433	90.072	26.548	10.406
503	Female	63.25	RS1	147.61	105.71	45.682	28.753	101.67	42.107	115.97	67.627	65.2	60.791	67.139	64.4	110.56	42.874	30.528	72.356	41.249	29.864	89.827	47.29	73.738	93.153	19.828	39.024	92.265	33.613	25.731
504	Male	61.51	RS1	149.89	100.52	17.22	24.734	96.664	21.306	119.87	51.514	30.8	56.885	49.072	36.4	103.83	40.275	2.6915	68.285	39.441	3.8314	89.618	31.278	36.728	87.221	16.383	2.5405	86.287	34.799	1.4404
505	Male	63.82	RS1	153.28	101.63	28.165	19.149	112.62	23.164	114.99	61.279	39.6	47.607	66.162	37.2	96.15	46.379	5.2777	63.512	47.946	4.7444	78.858	41.047	44.028	79.734	20.516	6.4915	80.862	38.644	2.4617
506	Male	64.28	RS1	158.07	102.79	21.279	19.534	100.51	27.266	123.29	58.35	38.8	57.861	57.861	42	109.15	37.741	3.1985	70.994	37.03	4.4167	92.151	31.201	44.368	92.737	13.435	4.5351	92.013	28.809	1.204
507	Female	81.73	RS1	153.47	102.69	31.24	27.565	96.264	49.185	128.17	71.533	65.2	65.186	69.092	74.8	112.07	40.103	33.008	73.522	37.088	39.282	100.29	45.359	83.8	97.313	15.038	45.188	93.233	27.888	30.343
508	Female	64.77	RS1	152.94	104.96	26.054	24.05	98.533	29.111	121.34	62.256	36.4	57.861	58.35	38	106.55	46.921	5.1077	71.535	45.483	4.7438	91.446	36.213	38.188	89.552	28.989	3.4142	89.891	42.547	1.965
509	Female	81.13	RS1	158.35	111.79	40.812	25.873	99.209	37.567	130.62	65.186	58	64.209	58.838	57.2	117.33	40.211	16.706	82.466	35.841	16.251	100.32	36.295	62.708	102.8	15.944	20.999	101.14	31.138	9.8282
510	Male	58.42	RS1	154.67	92.442	20.817	26.031	94.841	25.763	125.73	46.143	39.6	57.861	46.143	42	109.62	25.287	3.6923	69.329	25.573	4.3519	92.082	22.098	46.485	90.615	2.6096	5.6076	89.845	17.221	0.78325
511	Male	64.66	RS1	156.9	107.16	41.044	23.583	104.08	35.706	121.34	66.65	63.6	57.861	66.162	62.8	109.9	44.9	27.752	72.785	43.723	26.46	88.985	45.826	75.213	91.108	19.127	31.542	91.728	36.241	19.743
512	Female	66.14	RS1	145.43	119.33	22.249	21.362	116.93	22.836	111.57	73.486	29.2	52.978	73.486	31.6	99.256	62.293	4.0676	65.215	61.239	3.7838	82.161	53.239	34.491	81.574	43.751	3.6047	81.785	57.823	2.438
513	Female	61.86	RS1	146.97	111.94	43.382	29.489	103.16	43.107	121.34	66.65	58	63.232	61.768	58.8	108.58	46.964	17.749	77.751	44.671	19.055	94.282	40.19	61.076	95.35	25.023	19.785	93.615	39.372	12.261
514	Male	61.2	RS1	155.63	102.41	34.331	28.713	101.95	29.381	123.29	56.396	46	59.814	56.885	43.6	112.86	41.036	9.06	76.201	40.217	6.7347	91.422	35.325	51.636	96.704	13.502	10.498	96.334	33.339	2.5723
515	Male	75.35	RS1	155.24	94.506	28.294	23.082	88.881	28.402	123.29	50.537	51.6	56.885	47.119	52.4	114.59	25.099	11.286	69.934	21.185	11.861	91.433	21.987	60.348	93.653	1.7115	14.906	92.567	16.043	4.9897
516	Female	62.27	RS1	157.58	104.44	28.092	24.909	93.572	28.192	126.22	57.861	42.8	63.232	53.467	42.8	114.71	42.13	5.7386	77.748	39.101	6.4637	96.818	31.353	45.84	99.122	19.013	5.7505	98.371	34.244	3.767
517	Female	55.12	RS1	147.95	94.806	36.715	31.836	102.17	25.164	113.04	62.256	47.6	59.814	65.186	42.8	105.47	44.516	6.5648	73.722	45.418	5.0667	85.488	37.79	46.785	90.442	20.705	8.166	91.176	37.975	1.1651
518	Male	64.87	RS1	152.46	104.67	21.986	21.701	102.46	25.76	118.9	62.256	35.6	55.42	61.279	39.6	104.42	40.933	4.9846	67.029	41.11	5.8074	87.018	39.326	41.252	87.422	18.037	6.1773	86.01	32.836	3.1771
519	Male	60.77	RS1	156.38	102.95	23.821	23.124	97.318	25.523	125.24	56.885	37.2	57.861	54.932	38.8	109.29	38.592	6.0428	71.844	36.719	5.9988	93.21	31.83	47.864	94.898	8.8795	7.7313	90.358	29.698	1.7408
520	Female	72.11	RS1	153.84	104.17	34.962	26.415	101.95	40.409	122.31	61.768	56.4	61.768	60.791	58.8	107.68	39.499	20.716	74.687	39.059	21.466	92.93	35.601	65.51	91.433	18.139	22.26	90.93	34.465	13.916
521	Female	61.08	RS1	157.22	113.23	18.005	33.81	97.368	18.896	129.15	67.627	23.6	70.557	61.768	26	118.25	55.812	1.2521	84.78	52.017	2.5091	103.22	38.738	26.644	105	33.174	-2.1091	101.93	51.074	2.6995
522	Male	64	RS1	160.42	103.56	24.978	22.412	106.13	21.907	124.76	60.791	40.4	58.35	62.256	38.8	108.43	42.962	5.8171	67.58	44.889	5.9142	89.285	32.788	43.525	85.055	20.49	6.6542	86.922	38.056	2.6608
523	Male	63.27	RS1	153.39	94.071	31.717	18.708	105.35	28.81	116.94	54.932	58.8	47.119	59.814	54.8	102.89	22.964	21.638	60.813	27.534	19.743	81.57	31.333	64.837	81.77	2.4934	30.989	81.788	15.44	17.586
524	Male	69.73	RS1	159.85	96.478	34.917	21.782	95.152	30.282	122.31	55.42	58.8	55.908	55.42	54.8	108.47	33.303	20.377	67.354	32.947	18.33	87.604	34.452	66.791	88.758	4.9163	26.83	88.743	23.534	12.629
525	Male	67.44	RS1	156.87	104.9	29.092	19.636	97.718	22.106	120.85	60.303	40.4	55.42	58.838	37.2	106.61	47.324	5.6783	72.252	44.91	5.2152	88.251	31.764	45.978	90.557	19.169	7.8378	91.443	39.635	3.1732
526	Male	72.82	RS1	154.71	102.42	26.206	21.824	103.76	16.988	120.85	58.35	39.6	56.396	56.885	34.8	112.21	42.197	4.0469	72.012	40.185	3.1558	89.582	29.848	43.013	93.226	17.85	4.1065	93.216	35.497	-0.96037
527	Female	69.19	RS1	146.08	108.36	26.242	16.582	104.52	35.507	112.55	66.65	43.6	50.537	66.162	49.2	96.702	48.929	7.6744	58.894	48.983	9.4544	82.107	46.553	52.291	76.624	26.439	12.004	76.753	43.584	3.7147
528	Male	61.39	RS1	157.35	97.823	43.244	25.237	96.491	34.798	119.87	61.279	67.6	58.838	60.303	62	111.35	36.609	19.054	72.844	36.221	17.164	89.357	31.743	76.29	90.101	5.613	26.001	91.587	25.544	10.705
529	Female	61.98	RS1	145.3	113.44	26.46	25.262	120.05	27.617	110.6	74.463	37.2	55.42	76.416	37.2	98.066	65.521	4.8638	65.999	67.449	4.4378	81.729	53.341	40.401	81.924	44.935	5.2023	82.146	61.211	2.6775
530	Female	63.36	RS1	148.21	96.548	30.02	28.071	85.117	31.882	119.38	57.861	51.6	60.791	55.42	53.2	109.43	31.521	16.628	71.428	30.761	17.27	91.116	34.262	60.95	92.78	5.151	21.786	90.35	21.875	10.162
531	Male	64.9	RS1	158.87	95.568	22.798	25.412	102.63	18.549	119.38	53.467	37.2	55.908	56.885	30.8	107.54	37.603	5.7215	70.389	41.315	5.2165	86.041	28.869	39.151	88.097	11.711	5.732	90.592	32.991	2.4963
532	Male	60.01	RS1	157.31	96.906	28.708	22.155	93.076	38.631	126.71	56.396	59.6	58.838	52.978	63.6	113.14	31.685	23.249	69.558	28.873	27.282	95.105	34.815	72.234	92.635	6.8659	31.45	91.151	21.815	18.162
533	Female	61.27	RS1	153.6	109.89	36.135	26.556	98.887	37.63	122.31	68.115	56.4	64.697	63.232	57.2	112.15	46.37	16.87	77.668	42.878	16.972	95.05	43.422	62.338	97.915	24.124	20.006	95.889	38.114	10.077
534	Male	60.61	RS1	153.63	88.629	34.63	23.442	100.81	30.034	116.94	50.049	51.6	51.514	55.42	46.8	104.78	27.936	11.262	61.146	32.637	8.8044	81.758	22.77	54.6	81.911	2.1008	12.835	83.079	20.821	3.0049
535	Female	61.43	RS1	155.64	105.76	34.849	30.514	103.26	35.426	124.76	61.768	51.6	62.256	60.791	50.8	108.19	43.379	12.083	78.357	43.357	11.767	93.596	41.109	57.826	92.461	21.613	17.814	92.565	37.546	7.6665
536	Female	60.52	RS1	147.65	103.17	24.529	22.78	104.14	29.81	113.53	64.209	42	56.396	65.674	45.2	100.02	46.453	5.1004	68.218	46.248	5.7702	85.703	42.88	47.62	86.22	23.36	7.9625	85.081	38.389	2.3683
537	Female	60.78	RS1	150.6	100.71	42.336	29.94	100.83	35.755	118.9	62.744	56.4	55.908	62.256	53.2	105.86	42.959	17.497	72.189	43.811	15.464	86.196	39.646	63.937	88.485	19.773	20.799	88.758	37.357	10.238
538	Female	60.96	RS1	156.81	106.59	26.827	26.821	108.77	22.471	125.24	66.65	38.8	58.838	67.627	37.2	109.48	53.067	5.285	74.354	54.086	4.706	92.409	39.927	41.39	91.721	31.27	5.2227	92.482	47.97	2.7432
539	Female	60.43	RS1	153.89	107.72	30.368	28.694	99.768	33.603	125.24	63.721	44.4	64.697	60.303	48.4	110.78	47.266	6.2457	77.133	45.161	7.7334	95.847	39.716	48.37	94.937	21.295	9.9555	93.806	39.379	1.3459
540	Male	60.69	RS1	158.1	88.764	29.434	17.975	90.133	28.185	119.87	44.189	48.4	51.514	45.166	46.8	110.21	22.192	6.0138	63.599	21.905	5.231	86.41	17.091	54.575	87.451	1.5348	8.8739	87.143	15.084	-2.5214
541	Female	56.48	RS1	159	113.36	29.359	29.987	102.33	19.752	127.69	65.186	38	68.115	59.814	34	118.79	53.64	4.9313	82.561	49.693	3.9513	99.241	37.475	41.484	102.93	28.653	4.8099	103.08	46.417	2.3093
542	Male	60.45	RS1	154.99	103.52	31.484	25.621	99.574	31.612	125.24	61.768	52.4	57.861	59.814	53.2	112.97	38.625	13.435	72.661	35.376	13.014	92.742	43.221	60.566	95.672	9.3531	22.451	93.174	26.961	8.0953
543	Female	60.25	RS1	146.87	111.98	23.3	31.326	104.64	27.015	123.29	70.068	32.4	63.721	66.65	37.2	109.03	56.531	3.82	74.875	54.946	4.8827	95.591	44.442	34.533	94.027	37.449	2.3814	92.636	50.202	1.4035
544	Female	61.3	RS1	152.69	109.71	27.825	28.191	114.18	23.838	122.8	67.627	38	58.35	69.092	37.2	109.03	54.076	3.31	73.393	54.34	3.4285	91.096	47.245	40.31	91.654	32.235	4.0586	92.028	47.456	1.6877
545	Male	60.31	RS1	149.41	94.481	31.825	24.995	100.86	31.125	117.43	52.49	42.8	52.978	54.932	42.8	103.06	39.306	5.6174	65.077	39.833	5.5269	84.675	27.856	47.976	84.692	12.249	7.4761	84.588	32.234	3.2852
546	Male	61.03	RS1	150.26	98.297	18.353	22.824	100.73	22.409	121.34	55.908	29.2	52.49	56.885	33.2	103.87	44.794	5.326	64.808	45.48	4.1944	87.281	30.979	36.739	84.731	24.238	5.0335	84.007	42.36	4.8335
547	Female	60.87	RS1	149.88	102.4	28.851	26.158	101.31	28.199	118.9	58.838	42.8	55.42	59.814	42.8	105.74	42.42	5.2953	71.209	42.334	5.7425	88.365	35.997	48.467	87.69	19.805	6.7905	88.177	36.439	-0.32913
548	Male	60.72	RS1	158.33	95.729	28.526	29.794	103.3	18.368	121.34	52.978	47.6	57.373	55.908	39.6	110.42	31.241	7.409	74.492	32.242	5.3422	86.368	29.049	53.232	90.511	1.9236	12.184	93.292	22.321	1.1168
549	Female	60.72	RS1	149.55	125.45	21.298	26.406	109.33	27.897	122.31	73.975	29.2	63.232	66.65	34.8	110.16	63.704	3.1401	73.779	59.042	4.4883	95.863	45.579	33.891	95.487	41.822	2.2324	92.619	57.906	1.7124
550	Female	61.06	RS1	160.33	106.88	26.058	29.749	90.172	24.928	132.57	57.861	38.8	68.115	49.561	38	119.37	40.75	7.2236	84.462	37.205	6.1316	103.35	26.468	41.935	103.67	19.021	8.1177	101.98	33.9	4.6652
551	Female	61.27	RS1	150.45	100.67	35.557	30.189	101.46	37.317	121.83	60.791	52.4	59.326	61.279	55.6	108.17	39.984	19.486	71.983	40.649	21.779	91.572	42.321	59.164	90.23	21.231	28.215	89.908	34.175	16.411
552	Female	60.64	RS1	152.15	112.94	19.735	30.648	101.55	16.201	124.76	70.068	21.2	65.186	62.744	16.4	114	60.048	-3.192	81.999	56.127	-5.8661	97.749	44.747	19.764	99.99	35.849	-8.9075	98.151	54.451	-6.798
553	Female	60.65	RS1	147.69	98.577	31.687	27.591	109.64	34.04	113.04	62.256	46.8	54.932	70.068	48.4	94.041	44.268	8.3711	62.979	48.096	10.049	81.02	42.47	50.212	74.488	25.46	11.602	76.676	41.003	3.8683
554	Female	60.35	RS1	148.73	95.467	60.13	28.233	102	34.743	111.57	68.603	78.8	53.467	70.068	68.4	103.97	34.136	41.017	69.744	36.801	35.895	80.622	46.041	86.014	82.412	14.38	46.576	86.758	25.745	33.114
555	Male	60.37	RS1	150.93	90.17	35.627	20.893	88.6	41.178	119.87	48.584	62.8	55.908	48.096	66	107.16	23.362	20.152	65.839	22.683	22.759	88.388	26.73	72.297	87.9	2.4811	33.576	86.353	13.131	16.602
556	Male	60.27	RS1	157.78	100.15	19.05	18.436	98.778	17.41	119.87	52.978	33.2	52.002	54.932	31.6	105.07	40.699	8.3638	68.747	41.246	6.6589	86.025	27.69	39.967	84.276	15.299	6.4459	87.581	34.782	3.3571
557	Female	60.13	RS1	151.19	112.25	23.529	33.941	106.05	21.477	124.76	67.627	28.4	68.115	63.721	28.4	114.57	57.588	4.314	79.635	55.591	3.5262	98.255	41.906	31.49	98.859	34.709	2.9444	98.358	53.577	4.6186
558	Male	60.6	RS1	155.65	106.28	21.765	19.832	102.1	30.006	119.87	56.885	39.6	58.35	54.932	43.6	106.48	38.644	4.8981	68.934	36.68	4.7512	91.333	28.656	47.135	87.762	11.319	7.6652	86.476	28.898	2.1832
559	Male	60.81	RS1	155.53	105.03	25.466	19.325	107.03	21.096	120.36	61.279	43.6	53.955	61.768	41.2	106.26	44.557	5.2012	68.869	44.837	5.5385	86.287	36.862	48.045	88.483	21.875	7.4868	87.686	38.018	1.9894
560	Male	60.87	RS1	152.22	95.254	26.929	25.867	86.035	33.53	125.24	52.49	50.8	61.768	48.584	54	113.49	27.916	15.463	73.059	25.565	17.44	95.184	28.604	62.99	95.016	2.6713	25.244	93.289	16.63	11.431
561	Female	60.54	RS1	147.71	103.77	38.033	32.492	110.27	27.45	114.5	66.65	49.2	58.838	71.045	43.6	105.11	47.309	9.1861	73.803	49.014	6.5199	85.137	44.366	49.659	89.439	26.711	10.274	90.257	41.874	2.4179
562	Female	73.12	RS1	147.5	101.84	33.103	19.505	103.32	29.302	114.01	57.861	49.2	49.561	57.373	48.4	102.28	36.408	9.7771	63.195	36.818	9.3878	81.606	35.861	58.137	82.729	11.425	14.102	82.279	29.159	4.0418
563	Male	67.19	RS1	148.24	91.168	18.312	18.908	87.839	27.641	116.46	50.049	38	54.443	49.072	43.6	101.05	33.23	4.1636	62.83	31.987	5.4189	87.186	27.023	45.893	82.202	10.993	6.1545	80.91	25.306	2.7397
564	Female	66.26	RS1	146.45	115.38	24.446	24.455	110.21	29.278	115.48	70.068	34	56.885	69.58	35.6	103.56	58.641	2.0628	67.42	58.252	3.5421	86.228	45.803	36.593	86.17	39.862	2.1071	85.634	54.503	0.85817
565	Male	69.31	RS1	157.12	95.674	25.026	23.802	96.208	25.565	120.85	53.467	44.4	59.814	54.443	45.2	109.63	33.135	5.0215	72.04	33.504	6.2474	91.051	26.873	51.762	91.512	4.5604	10.194	91.771	24.429	1.2626
566	Male	66.36	RS1	151.77	107.41	27.367	29.287	100.9	31.648	125.24	60.303	46.8	59.326	57.861	50.8	109.16	40.745	5.5493	69.989	37.641	8.2341	92.888	30.719	54.335	90.792	8.6699	8.1202	89.587	30.636	-0.22516
567	Male	71.53	RS1	154.59	95.371	36.296	23.421	94.739	47.684	121.34	57.861	64.4	59.326	57.373	70	106.69	29.238	27.436	69.02	27.555	31.086	90.137	35.333	75.587	88.692	6.2049	39.877	87.113	19.541	25.625
568	Female	66.3	RS1	152.77	108.14	29.858	31.083	105.36	25.41	122.8	69.092	43.6	60.303	64.697	39.6	112.69	56.485	5.7242	74.639	55.149	6.3849	92.024	42.898	42.353	95.185	34.617	6.5266	94.777	49.694	4.0713
569	Male	68.47	RS1	154.76	93.643	32.436	24.284	89.79	38.759	121.83	52.002	54.8	59.814	50.049	58.8	108.36	32.523	15.13	70.48	30.26	18.345	92.904	26.562	63.715	91.741	6.6425	21.745	89.668	24.118	10.922
570	Female	67.15	RS1	154.39	97.892	39.274	34.019	98.651	31.406	123.78	62.256	62.8	62.744	61.279	58	111.72	42.252	21.252	77.012	42.232	18.027	93.122	37.154	65.677	95.205	19.856	22.971	94.686	36.406	13.741
571	Male	65.86	RS1	149.99	96.044	26.331	23.954	96.681	31.4	117.92	54.443	49.2	55.42	54.443	52.4	102.52	36.646	8.9224	65.809	36.975	10.939	87.468	33.811	57.182	84.032	11.2	14.793	83.189	28.183	4.6505
572	Female	65.43	RS1	143.58	105.92	25.83	19.47	113.23	31.255	105.71	69.58	41.2	48.584	72.998	44.4	90.596	51.448	6.0591	58.563	54.677	6.0218	75.628	46.298	45.616	72.187	33.341	6.1472	73.248	46.518	2.525
573	Male	75.71	RS1	144.55	103.82	22.281	19.327	106.15	36.05	114.01	60.791	43.6	53.467	60.303	50	97.472	41.918	7.9741	56.672	41.391	10.152	85.133	34.99	52.925	77.456	16.466	9.9419	76.04	34.605	2.8255
574	Female	66.24	RS1	154.75	110.82	17.715	29.522	106.79	18.316	125.73	67.139	32.4	63.721	64.697	33.2	111.93	56.004	3.9037	77.586	55.155	4.6269	96.692	45.136	36.492	98.031	35.229	0.42044	95.744	51.681	0.39159
575	Female	74.19	RS1	147.41	102.2	25.641	26.439	100.16	25.507	116.46	62.256	38.8	57.373	62.256	38	105.01	53.094	4.8023	69.352	52.063	4.9832	86.79	39.752	42.633	88.28	29.815	6.1259	88.184	46.118	2.2431
576	Male	66.61	RS1	154.52	97.918	28.303	20.076	91.188	33.455	120.85	53.955	49.2	59.326	51.514	52.4	109.65	33.217	8.8448	70.126	29.553	10.261	92.045	28.267	58.748	93.154	3.9151	14.25	90.097	22.259	3.1363
577	Female	66.58	RS1	148.08	95.135	42.014	28.484	99.882	39.855	116.94	58.838	57.2	56.396	60.791	57.2	103.51	39.18	21.608	68.044	40.835	21.817	85.363	39.334	65.023	84.858	20.17	25.94	85.847	32.265	16.114
578	Male	65.89	RS1	158.02	98.314	40.067	22.971	93.88	32.499	120.85	58.838	60.4	57.861	57.861	57.2	111.72	35.893	19.548	71.126	35.87	16.402	90.439	30.944	66.858	89.729	9.8736	22.088	90.914	27.169	11.64
579	Male	65.27	RS1	151.25	85.855	30.347	21.825	87.554	30.969	117.43	46.631	50	53.955	44.678	49.2	104.56	24.168	8.385	68.448	23.608	6.3779	86.802	22.626	58.07	88.082	1.6819	12.77	87.045	15.808	2.2887
580	Female	62.48	RS1	154.37	102.6	38.385	37.8	92.916	43.769	129.64	67.139	66.8	70.557	64.209	67.6	117.28	37.643	31.6	83.474	36.643	34.23	102.07	45.444	79.486	101.27	13.832	42.162	99.221	29.39	27.905
581	Male	61.23	RS1	154.51	100.13	33.696	22.237	103.35	33.152	117.43	57.373	58.8	55.908	59.326	57.2	103.92	32.279	18.748	66.734	34.118	17.877	85.248	35.347	72.639	84.627	4.2948	25.173	85.267	22.538	11.195
582	Female	66.24	RS1	143.51	80.494	36.998	19.548	88.259	47.16	111.08	46.631	65.2	49.072	50.049	70.8	91.16	24.13	31.907	55.156	26.546	37.365	78.824	28.628	75.229	70.698	3.603	41.193	71.126	17.584	30.418
583	Male	73.81	RS1	159.14	99.609	24.922	23.762	99.611	24.299	122.8	52.978	42	58.35	53.955	42	108.01	35.749	2.8128	71.967	36.372	1.2309	90.678	27.922	48.035	89.556	10.892	5.3984	89.91	29.113	-0.62336
584	Male	65.09	RS1	155.95	96.535	23.054	24.612	103.07	19.175	119.38	48.584	36.4	52.978	52.002	34	106.22	29.969	4.8882	68.748	33.032	3.6598	85.234	21.731	37.82	85.203	5.6749	3.9031	87.651	24.58	0.99202
585	Female	63.35	RS1	150.54	104.4	23.863	27.429	97.058	27.871	121.83	64.697	41.2	61.768	60.791	44.4	105.18	46.28	4.9708	73.269	44.104	5.5997	93.136	37.853	48.051	90.411	22.408	7.1773	89.374	37.982	2.538
586	Female	64.52	RS1	150.26	107.49	23.918	22.304	105.43	28.141	117.92	68.603	42.8	58.35	67.139	44.4	104.39	51.338	4.6963	70.192	50.325	4.8371	89.605	45.911	52.12	87.518	28.655	8.2661	87.92	44.783	-1.5239
587	Male	65.98	RS1	150.76	104.71	35.273	21.796	98.677	36.785	119.38	58.838	60.4	55.908	56.885	60.4	106.97	36.741	17.364	67.229	33.699	16.426	88.035	32.105	69.115	89.099	10.852	24.545	87.097	27.709	11.631
588	Male	67.94	RS1	151.98	90.557	28.158	17.531	107.29	29.222	111.57	51.514	47.6	48.096	58.35	50	95.588	37.168	10.253	58.464	41.541	11.69	77.958	28.687	56.385	74.467	13.375	12.218	75.939	32.115	4.3676
589	Male	69.81	RS1	158.52	112.34	18.346	25.003	96.384	18.088	127.69	66.162	30.8	64.697	59.326	30.8	118.44	48.449	3.5463	79.866	43.593	1.8279	99.316	35.245	35.255	104.58	22.633	3.7802	99.622	39.538	-0.01141
590	Female	66.11	RS1	149.39	97.309	28.463	23.796	96.018	31.149	117.43	52.978	46.8	53.955	51.514	48.4	102.47	34.109	6.751	68.041	34.234	7.4836	85.911	27.95	55.549	85.276	10.85	9.4153	85.114	27.433	0.73494
591	Male	65.11	RS1	154.85	90.132	30.877	25.953	87.891	23.644	122.31	43.701	49.2	58.838	43.701	45.2	113.6	25.095	8.0464	71.943	24.018	5.2767	90.758	19.326	54.312	93.604	0.49836	10.11	92.781	17.286	1.0333
592	Female	65.54	RS1	160.6	95.393	42.491	26.493	92.301	42.389	126.22	54.932	62.8	62.256	54.443	62.8	110.91	33.714	29.711	76.517	33.295	29.23	94.413	31.834	72.883	93.4	8.7584	33.41	93.744	25.82	21.736
593	Male	71.3	RS1	155.94	105.64	24.758	23.804	95.49	25.763	122.31	54.443	40.4	63.232	50.537	42	109.21	41.006	6.3037	74.643	37.683	5.9993	94.277	33.155	51.235	91.484	14	8.4938	91.498	32.032	2.1205
594	Female	66.24	RS1	160.04	109.22	39.445	31.984	96.781	38.237	129.64	70.068	61.2	70.068	64.209	60.4	119.47	42.071	23.359	86.666	38.279	22.62	101.93	44.721	68.775	106.58	15.883	30.974	103.64	32.86	16.35
595	Male	65.66	RS1	151.89	96.586	28.375	22.62	100.53	28.193	118.41	57.861	54	53.955	59.814	54.8	105.41	33.365	15.085	63.992	35.731	14.604	85.971	34.371	63.872	83.579	8.9351	20.251	84.13	25.534	8.5414
596	Male	65.5	RS1	154.01	89.722	33.729	17.561	102.61	32.105	117.92	54.443	52.4	49.072	60.791	51.6	102.4	34.505	12.806	59.65	37.105	12.253	81.39	30.55	60.865	80.045	10.234	19.697	80.424	28.203	8.4228
597	Male	66.83	RS1	154.02	83.47	32.334	19.924	95.536	24.333	115.48	46.631	51.6	50.537	53.467	47.6	104.74	27.21	11.206	61.746	31.016	10.956	80.32	28.732	58.046	83.091	6.2941	16.248	82.512	22.953	6.1247
598	Male	68.32	RS1	152.05	91.208	35.302	22.93	92.28	39.85	120.36	49.561	62.8	55.42	52.002	65.2	107.04	24.839	28.877	64.63	23.403	29.034	88.021	29.493	75.564	88.38	2.5993	37.266	85.266	15.849	23.624
599	Female	64.74	RS1	148.93	106.09	34.067	27.667	95.135	41.941	121.83	67.627	54	64.697	61.768	58	111.95	43.787	21.553	72.616	40.93	23.203	95.918	44.727	63.364	93.911	18.663	25.548	92.258	34.671	13.687
600	Male	65.56	RS1	153.09	110.38	20.774	18.679	105.99	30.743	121.83	64.209	36.4	52.002	62.256	43.6	102.67	48.226	5.0359	65.685	46.682	5.5309	88.497	38.774	42.314	85.571	26.855	4.9897	85.405	40.762	2.8965
601	Female	65.99	RS1	146.15	104.96	23.969	24.338	106.8	18.154	113.04	64.209	38	52.978	65.186	34.8	102.8	49.008	4.6768	65.385	49.778	3.1139	81.408	40.083	41.124	84.219	29.519	4.2224	83.696	44.483	1.561
602	Male	67.16	RS1	150.6	91.455	31.238	22.253	94.961	33.205	117.43	53.955	52.4	54.443	55.42	53.2	102.52	30.786	13.438	68.636	31.029	14.17	89.516	33.221	59.694	86.085	5.037	18.051	85.244	21.262	5.2577
603	Female	66.78	RS1	148.78	107.49	21.587	21.382	105.6	24.5	117.92	62.744	34	53.467	61.279	35.6	103.7	46.851	4.3172	65.51	45.405	4.803	85.704	36.262	34.78	86.714	25.287	3.0018	85.443	40.526	1.9271
604	Male	66.28	RS1	157.23	89.482	27.669	21.367	92.954	23.011	121.34	45.166	51.6	54.443	47.607	48.4	109.81	25.476	11.153	65.95	25.556	9.833	87.909	26.445	63.034	89.161	1.7502	17.01	88.566	16.773	3.5178
605	Female	65.45	RS1	157.44	94.833	27.975	30.002	94.995	21.254	124.76	56.885	49.2	60.303	58.35	46	113.53	34.003	9.8824	75.429	33.374	8.3789	92.783	31.837	56.957	94.24	7.848	12.804	94.881	25.724	2.7922
606	Female	65.53	RS1	148.95	100.71	43.437	23.987	95.019	39.749	114.99	64.209	66	54.932	64.209	65.2	101.98	38.814	33.923	68.604	37.41	32.834	83.949	43.334	77.752	86.284	18.054	42.791	85.952	30.259	30.428
607	Male	65.45	RS1	158.32	89.774	31.213	24.385	82.787	26.839	124.76	40.771	50.8	58.838	38.33	49.2	115.76	20.135	8.9858	74.183	16.806	7.1022	93.907	15.782	58.075	98.437	1.5164	12.649	96.137	11.997	2.6837
608	Male	73.57	RS1	155.24	92.743	31.13	18.477	97.425	31.967	115.97	53.467	54.8	54.932	56.885	54	105.26	35.185	21.688	67.589	35.843	19.259	84.749	32.548	65.564	89.257	8.9066	24.564	88.054	26.643	13.022
609	Female	73.21	RS1	164.88	116.49	38.925	49.711	86.125	22.971	143.31	71.045	54.8	86.67	56.396	46	142.68	51.837	14.38	106.89	40.839	8.8567	119.41	41.239	56.106	131.98	24.27	14.191	127.9	40.002	5.2458
610	Female	65.64	RS1	151.42	109.86	28.635	18.856	117.4	35.086	116.46	68.115	50	53.467	71.533	54.8	99.286	48.764	15.793	62.357	50.733	16.683	82.926	47.089	57.837	79.863	25.731	21.134	79.634	43.045	9.8082
611	Female	66.23	RS1	152.41	111.24	25.13	28.464	99.629	26.01	124.76	67.139	39.6	63.232	61.279	40.4	113.23	42.17	5.6511	77.991	37.888	6.7148	97.165	38.39	46.689	98.303	17.707	9.4832	96.086	33.739	0.61769
612	Female	65.59	RS1	150.8	109.44	26.936	28.773	106.49	27.535	117.43	65.186	31.6	62.256	63.721	31.6	110.61	59.379	1.2341	69.693	59.238	2.0045	90.417	40.484	31.583	91.158	40.556	-0.74864	91.042	59.181	0.71914
613	Male	65.41	RS1	154.79	96.935	35.764	24.061	97.324	33.056	123.29	53.467	57.2	58.35	54.443	55.6	109.26	30.669	17.991	69.582	30.837	17.968	90.193	30.938	64.26	88.922	5.4063	22.91	89.768	22.831	11.186
614	Female	65.29	RS1	148.61	113.3	21.911	24.969	118.21	20.091	114.5	68.603	30.8	56.885	70.557	30	102.9	61.266	2.3469	68.471	62.964	3.024	85.076	50.087	32.39	86.243	45.589	-0.19582	86.903	60.593	1.5958
615	Female	65.83	RS1	149.58	120.25	16.36	30.943	101.84	19.447	126.22	74.463	26.8	66.65	64.209	29.2	115.15	58.077	2.793	80.386	52.185	3.6947	99.695	47.51	32.447	102.57	33.642	2.5293	99.304	50.333	0.42853
616	Male	67.15	RS1	154.55	102.96	29.248	18.908	106.54	32.701	116.94	61.279	50	52.978	63.721	53.2	103.51	34.658	13.858	62.497	36.031	14.047	83.836	33.628	58.459	83.051	7.9787	22.621	82.706	27.044	9.5545
617	Female	66.81	RS1	146.86	96.954	29.088	24.931	102.84	26.221	114.99	60.791	46	53.467	62.256	44.4	101.66	39.161	6.5705	69.831	39.222	6.1092	84.381	34.912	48.888	86.37	18.374	6.7642	85.997	32.342	1.5165
618	Male	65.15	RS1	158.33	97.387	31.398	25.249	102.12	22.326	120.36	51.514	52.4	56.396	53.955	46.8	108.39	27.889	10.566	67.392	30.44	8.3031	87.128	28.727	59.18	86.537	2.009	15.207	87.451	19.151	4.0982
619	Female	65.8	RS1	153.29	109.17	19.152	27.201	98.861	26.488	125.73	66.65	34	64.209	61.768	37.2	111.65	52.086	5.7168	73.467	48.621	3.2974	96.838	36.339	36.625	96.198	25.964	5.4696	93.588	45.089	3.6506
620	Female	61.12	RS1	154.02	98.901	25.859	21.982	98.478	30.502	119.87	51.514	46	55.908	52.49	50	104.16	33.066	11.529	68.462	33.136	12.745	88.654	31.298	56.699	85.57	11.568	18.383	85.331	27.241	7.2679
621	Female	66.28	RS1	157.8	114.57	31.636	30.744	103.68	27.946	127.69	74.951	45.2	65.186	69.092	43.6	115.09	57.164	4.2928	81.988	54.655	4.1482	98.16	45.204	48.4	100.42	31.999	6.8567	99.016	49.982	-0.50669
622	Male	73.97	RS1	154.13	97.547	34.631	20.546	104.66	27.23	114.99	54.443	49.2	52.978	58.35	46	102.75	40.935	7.8842	69.044	42.751	6.3043	83.65	29.543	52.9	84.3	11.421	11.73	85.287	34.094	1.2449
623	Male	68.91	RS1	157.65	99.168	33.032	16.436	90.66	36.181	124.76	51.025	54.8	55.42	44.678	58.8	111.99	28.745	17.45	70.228	23.909	19.121	92.741	26.291	67.949	94.517	2.0227	22.472	91.311	17.45	11.455
624	Female	67.09	RS1	148.8	110.56	35.349	25.169	104.31	38.891	119.38	66.162	54.8	56.396	63.721	55.6	108.49	48.174	22.81	71.013	46.017	21.499	89.852	44.653	62.627	90.552	27.881	26.519	90.068	42.913	17.418
625	Male	65.89	RS1	153.98	98.648	20.699	17.808	104.28	25.756	116.94	55.908	39.6	51.025	57.373	42.8	99.473	41.517	4.7247	62.946	42.013	5.1069	83.1	34.559	49.643	82.289	20.203	6.0131	81.164	35.455	0.73851
626	Male	65.87	RS1	157.02	108.33	27.354	19.451	104.73	32.535	123.29	59.814	49.2	52.49	59.326	50	107.74	41.379	11.868	68.641	40.855	12.845	87.938	34.531	56.776	88.641	18.098	15.406	88.176	34.939	5.4637
627	Female	66.52	RS1	153.62	104.09	34.876	25.489	99.368	27.925	120.85	61.279	52.4	57.373	58.838	49.2	108.55	43.55	8.9795	73.541	41.915	7.6953	89.126	39.782	55.953	91.794	17.417	12.294	91.889	35.519	1.9354
628	Male	66.72	RS1	156.61	105.49	24.875	24.433	97.04	24.773	122.8	54.932	38.8	61.279	52.49	38	109.74	43.717	5.824	77.329	41.636	4.6925	93.904	33.615	45.071	94.237	20.49	5.7407	93.459	35.766	1.7648
629	Female	64.96	RS1	146.51	100.83	32.17	20.452	109.77	32.063	108.64	61.279	46.8	51.025	65.674	46.8	95.293	47.232	5.5026	62.059	49.902	6.237	77.65	39.04	48.349	76.604	27.179	6.5361	78.118	44.058	0.1806
630	Male	70.44	RS1	153.15	92.627	23.988	21.07	106.75	17.111	112.06	55.908	40.4	50.537	60.791	36.4	98.188	36.369	5.6345	66.11	40.022	4.9207	79.062	35.77	45.243	79.671	14.804	7.5788	81.179	30.568	3.0374
631	Female	69.16	RS1	144.79	106.75	35.067	25.426	98.199	48.614	118.9	64.697	63.6	62.256	59.814	70	107.66	45.401	30.382	71.473	40.891	35.451	93.31	42.75	74.856	93.682	22.693	38.98	90.007	36.551	27.27
632	Male	64.84	RS1	157.5	104.78	24.075	26.625	103.43	18.197	125.73	60.791	38	59.814	56.885	33.2	111.66	42.705	5.9545	76.371	41.461	4.4287	91.888	33.527	43.982	92.874	13.804	7.5134	93.466	33.502	2.7718
633	Female	65.53	RS1	152.15	104.98	27.3	24.61	106.27	30.337	119.87	66.162	40.4	55.42	69.092	43.6	103.46	47.302	6.7173	69.361	48.069	7.2178	87.594	43.799	47.311	85.462	24.837	7.618	86.185	42.342	0.18874
634	Male	69.24	RS1	153.26	91.675	20.209	20.638	86.735	22.089	122.8	44.189	34.8	54.932	41.26	36.4	106.98	25.211	5.5737	69.39	23.833	5.191	90.64	17.672	46.737	90.583	1.4815	7.7312	88.547	17.419	3.3952
635	Male	68.48	RS1	157.45	103.98	23.245	29.078	93.571	22.721	131.1	50.537	40.4	66.162	45.654	40.4	118.5	35.346	7.0363	81.063	33.487	6.8296	101.28	23.209	46.859	102.62	10.047	7.9999	101.61	28.142	3.516
636	Female	65.79	RS1	153.04	111.28	36.099	27.514	99.623	33.255	120.85	68.603	58.8	62.256	64.209	57.2	113.79	42.121	21.186	78.135	39.462	20.282	92.578	42.412	67.439	97.363	16.306	30.679	96.017	31.739	15.965
637	Female	70.9	RS1	145	90.264	37.294	18.635	94.477	35.79	112.06	56.396	56.4	49.072	58.838	57.2	100.97	34.636	19.234	59.81	36.111	19.036	80.885	35.012	64.669	80.312	13.295	26.315	80.091	29.114	12.029
638	Male	74.11	RS1	152.38	93.172	32.741	20.239	101.05	31.965	116.46	52.002	46	50.049	58.838	48.4	96.842	30.101	5.3991	58.738	34.248	6.3943	80.159	30.44	52.697	77.161	3.1318	10.124	76.717	23.367	2.3662
639	Male	68	RS1	148.72	91.556	34.267	17.619	96.305	36.108	111.57	51.025	62.8	46.143	52.49	66	96.269	28.825	22.917	56.052	29.966	23.294	77.491	28.72	74.154	76.336	3.2995	31.414	75.509	20.719	18.412
640	Male	76.42	RS1	154.21	95.028	23.646	21.68	97.527	29.517	118.9	52.002	41.2	57.861	52.978	44.4	104.53	31.004	4.1092	64.757	31.307	5.8222	87.162	29.928	51.416	83.892	4.8148	8.2354	83.506	22.54	-0.88458
641	Female	66.91	RS1	153.31	109.64	26.876	23.966	103.37	29.806	122.31	67.139	46	58.838	64.697	48.4	104.77	45.214	8.0659	73.279	43.806	8.4333	91.976	37.595	52.082	90.32	19.139	10.995	89.27	37.118	3.1943
642	Male	66.17	RS1	154.13	97.601	23.553	23.036	95.621	19.818	120.36	51.514	36.4	53.955	51.514	35.6	108.44	33.819	0.92038	68.483	33.941	-0.42903	87.596	22.715	37.997	88.141	11.529	-1.5373	89.878	29.002	-5.6752
643	Male	69.15	RS1	158.19	90.468	18.707	22.159	95.538	21.134	122.8	51.514	34.8	58.35	53.467	37.2	108.09	34.9	5.6385	69.755	33.954	5.2982	90.267	23.096	43.708	88.114	10.282	6.8949	87.607	27.851	3.5679
644	Female	65.16	RS1	154.19	101.52	35.582	29.054	105.7	32.546	121.34	59.814	50.8	59.814	63.721	49.2	107.93	42.473	13.491	71.47	44.45	13.933	88.668	39.097	54.35	88.062	20.014	16.818	89.432	36.478	6.4775
645	Male	65.03	RS1	156.19	97.812	26.227	27.65	94.272	31.593	124.76	53.955	46	63.232	52.978	47.6	110.07	41.617	5.1657	74.86	40.366	5.0692	94.698	29.681	53.238	97.643	10.948	8.5117	93.623	34.002	0.95568
646	Female	68.25	RS1	155.63	107.4	38.307	27.698	97.346	34.014	126.22	67.139	57.2	60.303	61.768	54.8	111.34	45.487	15.856	79.409	43.427	15.065	92.124	44.824	64.101	95.431	19.835	22.926	95.394	37.043	9.3865
647	Female	67.59	RS1	145.63	106.77	30.775	21.489	96.854	42.049	119.38	65.674	54.8	58.35	61.279	62	103.38	46.968	20.045	70.431	42.482	21.999	90.821	42.003	64.796	90.069	23.943	25.816	87.886	38.849	15.629
648	Male	70.93	RS1	155.27	97.522	23.821	18.674	102.32	27.182	116.46	53.955	43.6	53.955	55.908	43.6	103.06	38.798	7.346	62.086	39.553	8.6238	84.167	32.359	50.368	82.159	12.201	8.5878	82.07	31.861	0.99172
649	Female	67.16	RS1	148.29	104.99	47.112	26.122	103.93	49.475	120.36	69.58	69.2	54.932	69.58	72.4	105.1	44.853	34.901	68.574	43.576	35.96	88.852	48.219	79.819	86.673	24.534	44.499	87.282	36.861	32.177
650	Female	66.17	RS1	156.67	99.847	34.362	27.072	108.62	25.348	121.34	63.721	46	55.908	67.139	43.6	107.39	47.1	8.1858	73.871	49.144	7.3146	87.211	41.057	49.106	89.199	25.606	8.5044	90.7	42.514	2.2013
651	Male	67.24	RS1	154.97	94.32	34.01	25.142	93.589	35.537	123.29	51.514	54.8	55.42	50.537	54.8	106.22	34.168	14.398	70.608	35.095	14.821	89.56	32.082	65.114	86.461	7.0243	20.439	87.628	26.278	9.4952
652	Male	69.34	RS1	151.79	97.595	24.575	20.519	94.717	35.721	121.34	57.861	49.2	58.838	54.443	55.6	107.56	33.74	9.6136	65.52	31.208	12.772	92.149	35.988	60.627	89.616	8.5674	18.523	86.858	24.402	6.1698
653	Male	69.46	RS1	162.86	91.491	49.118	20.15	93.492	39.61	122.31	63.232	82.8	52.49	64.209	78	111.33	32.019	47.495	70.818	29.689	43.597	87.342	37.788	97.057	93.528	5.291	57.532	92.52	21.997	42.873
654	Female	66.46	RS1	152.23	108.36	29.727	25.125	109.19	26.97	117.43	64.209	42	55.908	65.186	42	105.08	49.315	6.7561	72.033	48.681	5.8131	87.238	38.252	46.81	90.365	24.788	7.9286	89.334	42.57	3.3748
655	Male	66.02	RS1	154.44	107.11	19.851	29.208	90.975	25.485	128.66	60.303	28.4	66.162	52.978	33.2	115.45	43.005	4.5322	78.487	38.008	4.8276	101.22	29.791	33.694	100.02	18.496	3.8459	97.918	35.874	2.2764
656	Male	65.3	RS1	154.56	98.801	29.838	21.002	96.948	29.828	121.34	53.955	48.4	54.443	52.49	47.6	110.21	34.529	7.281	69.991	34.515	6.8502	89.261	25.895	53.211	88.518	7.8815	9.5967	90.215	26.284	1.846
657	Female	65.29	RS1	152.8	104.53	33.152	28.923	93.695	32.078	125.24	58.838	56.4	60.791	53.955	55.6	113.14	35.508	18.364	77.064	32.683	17.246	94.253	36.996	65.336	95.672	13.359	24.78	95.562	27.778	12.892
658	Male	70.09	RS1	148.12	90.92	27.376	16.287	104.43	29.459	109.62	52.978	42.8	47.119	60.303	44.4	94.293	36.168	5.7778	58.473	39.333	6.6506	76.794	34.383	49.064	74.569	15.999	6.9937	75.814	31.156	2.6104
659	Male	69.66	RS1	156.24	101.99	26.341	25.799	86.659	31.289	128.17	56.885	46	64.209	50.537	49.2	114.73	33.288	9.9841	76.513	28.097	11.177	98.54	26.601	53.446	98.728	4.9352	11.428	96.401	22.978	4.0217
660	Female	65.95	RS1	149.49	107.85	31.546	23.186	101.68	41.288	119.87	64.209	55.6	58.35	62.744	61.2	103.68	43.474	18.784	67.327	41.343	20.811	89.774	44.551	64.232	86.996	19.216	27.209	83.785	34.733	13.573
661	Male	68.07	RS1	151.16	92.396	34.804	19.642	96.413	33.992	115.48	53.467	58.8	51.514	55.908	58.8	103.28	31.696	19.283	62.908	33.997	17.02	82.287	28.857	68.366	83.384	3.2375	24.85	82.917	22.428	11.671
662	Male	68.33	RS1	157.06	106.72	29.487	29.131	102.63	29.209	128.66	61.768	44.4	62.256	59.326	44.4	114.49	44.482	4.5763	79.086	42.464	4.6611	96.708	34.638	52.428	97.017	16.597	8.9592	96.805	37.188	-0.22565
663	Female	66.19	RS1	146.47	98.541	33.416	22.434	103.46	30.535	111.57	60.303	54	51.025	64.209	51.6	100.93	38.28	12.544	64.74	40.089	11.724	81.052	38.223	58.131	82.623	16.183	15.779	82.526	32.906	5.8317
664	Female	63.57	RS1	157.4	107.71	32.182	36.201	96.765	20.72	128.66	68.115	45.2	66.65	63.232	38.8	119.53	48.875	4.1654	85.98	46.526	3.1492	99.503	41.123	43.988	104.69	24.507	4.6413	104.07	40.272	0.43058
665	Male	65.05	RS1	155.25	90.894	28.495	21.227	89.78	31.82	119.38	50.537	47.6	58.35	50.049	49.2	105.63	28.275	9.4892	69.616	26.705	9.81	89.18	26.485	56.685	89.373	2.0813	14.535	88.28	17.877	3.2946
666	Female	65.73	RS1	153.47	112.31	30.529	30.913	107.07	32.33	124.76	68.115	43.6	63.721	66.162	45.2	112.52	51.613	7.5644	75.05	48.903	7.8745	94.352	45.834	50.869	95.825	25.86	9.351	94.446	43.301	2.3127
667	Female	66.14	RS1	149.33	113.64	24.995	25.345	107.01	29.682	121.34	70.557	34	61.768	67.139	37.2	108.52	60.311	4.9056	72.08	58.668	5.557	91.709	44.344	36.977	91.422	41.689	4.7724	91.851	56.804	3.488
668	Male	66.2	RS1	157.24	95.642	27.872	24.535	95.699	23.987	122.8	50.537	39.6	61.279	50.049	38	114.41	34.207	5.3305	72.548	34.533	4.5015	91.401	26.814	44.009	94.074	15.547	3.7048	95.947	29.017	1.2728
669	Female	65.15	RS1	143.94	101.22	38.561	23.132	106.57	36.203	110.11	66.65	58	51.514	70.068	58	96.034	47.935	19.759	64.985	48.712	18.662	80.343	48.146	63.633	77.795	27.073	28.033	77.754	42.345	14.012
670	Female	68.83	RS1	145.46	102.74	29.621	32.12	110.09	32.561	114.01	61.279	44.4	57.373	64.697	44.4	100.65	49.806	8.5612	64.94	51.53	9.5461	85.008	41.812	50.016	80.219	28.185	10.423	81.89	45.411	2.857
671	Male	65.24	RS1	154.65	92.75	30.495	20.266	92.306	30.69	120.36	43.701	54.8	51.514	44.189	54	110.13	21.59	14.55	64.596	21.503	12.773	86.312	17.836	66.65	87.523	1.8284	20.099	87.565	16.037	5.4479
672	Male	73.11	RS1	154.76	100.12	29.048	16.379	105.8	35.004	117.43	59.326	54	52.978	60.303	57.2	102.18	38.705	10.591	63.659	40.759	12.858	85.328	39.552	66.037	80.62	13.263	16.447	81.565	32.168	5.1312
673	Female	70.27	RS1	152.41	105.08	33.569	29.424	102.65	24.636	123.78	62.744	45.2	57.373	60.791	41.2	112.57	47.725	6.3194	75.297	45.183	6.0678	91.118	37.949	48.944	96.056	23.481	8.8174	95.347	40.071	2.5654
674	Female	65.76	RS1	152.04	101.01	44.022	24.349	111.4	30.543	111.57	62.256	60.4	52.49	67.627	52.4	102.91	41.873	19.119	64.82	45.023	14.403	79.284	44.13	62.595	81.163	20.914	19.588	84.036	37.135	9.8914
675	Female	72.52	RS1	149.72	118.95	27.802	28.176	106.09	36.546	125.73	73.975	40.4	64.209	67.627	45.2	111.36	56.019	4.4929	76.276	52.572	5.4956	99.427	46.746	48.149	95.079	29.736	7.0366	93.358	47.422	-0.39336
676	Female	62.15	RS1	152.33	100.03	34.003	25.55	91.405	41.611	122.8	57.861	52.4	61.768	53.955	55.6	110.05	38.428	13.748	73.818	35.519	15.754	94.431	33.706	61.341	93.513	16.429	19.796	91.816	31.077	9.131
677	Male	69.72	RS1	156.19	88.622	40.145	16.355	94.518	42.983	114.5	55.42	74	52.002	60.791	75.6	103.92	25.425	41.143	60.619	26.246	40.273	81.878	35.644	86.817	84.434	3.5458	50.077	83.252	16.818	35.01
678	Male	66.58	RS1	149.06	93.695	26.356	16.207	94.731	28.215	112.55	55.42	43.6	50.049	55.908	46	95.601	33.059	4.6549	59.67	34.829	6.0765	81.386	32.829	52.339	75.754	10.633	7.6731	75.845	26.998	-0.81447
679	Female	65.95	RS1	159.58	102.43	33.098	37.085	109.05	21.789	126.22	60.791	45.2	64.209	63.232	38.8	117.02	38.748	6.2471	77.985	41.476	4.1401	94.481	38.712	44.353	93.981	15.706	7.509	96.568	33.046	0.73254
680	Male	65.62	RS1	151.12	100.68	27.168	17.164	91.347	36.772	120.85	59.326	54.8	57.373	54.443	59.6	109.29	32.7	20.921	68.211	28.069	23.984	91.433	30.132	70.122	91.458	3.4968	29.784	89.058	20.275	16.629
681	Male	66.53	RS1	154.47	105.4	18.783	19.856	105.84	21.487	119.38	58.838	22.8	53.955	60.791	25.2	101.83	55.127	0.58801	68.057	57.11	-3.4304	87.1	33.994	24.513	86.692	31.751	-4.8883	86.442	53.92	-3.8853
682	Female	55	RS1	144.68	97.799	37.183	24.219	110.5	36.775	109.13	60.303	50	51.025	66.65	48.4	93.049	42.774	6.9301	59.945	47.47	6.617	77.381	39.268	56.001	72.218	19.287	10.005	74.853	37.689	0.44794
683	Male	71.79	RS1	152.02	97.338	18.03	20.883	99.747	27.015	117.92	54.932	38	54.932	57.861	43.6	102.17	37.278	5.8154	63.74	37.861	6.3794	86.018	31.66	42.686	81.025	11.085	5.6697	81.792	29.203	4.1995
684	Female	68.56	RS1	150.64	105.31	23.957	29.4	95.599	22.943	120.85	68.603	42.8	64.209	63.232	42	110.72	46.871	3.3885	77.666	44.483	3.1494	94.443	38.279	45.989	97.367	20.222	6.8899	95.47	37.949	-1.1739
685	Male	66.16	RS1	156.67	96.353	32.844	26.069	89.349	27.756	125.24	51.025	46.8	60.791	47.607	45.2	113.14	33.971	7.4755	75.13	30.82	6.7679	93.155	25.837	54.31	95.269	5.2043	8.4184	94.333	25.195	1.8642
686	Female	67.81	RS1	146.59	109.19	28.191	21.514	101.13	33.332	115.97	62.744	46.8	53.955	60.303	50	102.81	46.13	6.5446	65.667	43.557	7.1397	86.658	36.314	52.309	87.281	19.601	9.0773	84.662	37.298	1.1168
687	Female	70.4	RS1	156	96.508	33.248	27.458	83.484	35.087	131.1	50.049	55.6	62.256	44.189	58	113.4	28.483	17.663	79.359	24.621	18.034	97.139	28.436	67.037	98.034	2.6877	26.968	96.995	18.865	13.941
688	Male	65.45	RS1	156.49	98.489	39.447	20.65	99.27	35.383	120.36	52.002	59.6	55.908	51.514	58	108.65	28.951	21.325	66.923	27.813	18.707	88.013	28.143	63.493	89.688	2.7486	23.815	88.887	20.728	10.252
689	Male	65.95	RS1	158.29	102.63	23.43	27.573	90.693	25.798	132.08	52.002	37.2	63.721	46.631	38	116.43	40.177	4.3689	79.11	37.123	4.1042	100.03	28.062	40.606	100.07	16.727	4.8611	98.331	33.568	2.334
690	Female	66.64	RS1	154.58	96.312	30.567	28.053	102.18	30.507	124.27	56.885	42.8	57.373	59.814	42.8	106.17	39.852	4.9195	73.11	41.182	5.7976	89.951	36.936	50.001	88.465	18.493	6.2445	89.084	32.765	0.23381
691	Male	66.51	RS1	157.19	103.58	27.106	20.902	94.931	28.09	122.8	55.42	52.4	59.326	52.978	53.2	110.34	36.609	10.058	73.06	35.164	8.6557	91.87	36.334	61.265	92.196	11.541	14.937	91.879	28.58	3.644
692	Female	66.28	RS1	151.86	103.79	27.971	22.81	103.1	25.429	116.46	66.162	45.2	57.373	63.232	43.6	103.32	51.764	6.6834	68.792	51.78	6.5376	86.606	39.444	45.815	85.625	28.043	7.1139	85.493	45.296	3.0966
693	Male	76.37	RS1	157.6	100.75	29.178	25.787	91.688	26.302	123.29	60.303	50.8	64.697	57.861	50	115.49	40.451	10.984	79.512	35.704	8.7481	94.335	34.973	58.328	101.08	12.608	12.337	99.632	30.404	2.1393
694	Male	68.85	RS1	155.93	101.38	28.827	22.592	105.69	23.506	119.38	60.791	40.4	55.42	62.744	37.2	105.03	41.656	4.5668	69.483	42.775	4.7005	86.764	33.317	42.699	87.315	19.5	7.0289	87.491	34.841	3.3642
695	Female	68.53	RS1	151.36	97.616	33.088	19.027	101.86	34.108	114.99	64.697	55.6	52.002	66.65	56.4	99.34	46.047	15.251	65.328	47.425	14.774	83.159	42.833	62.044	81.581	26.241	17.966	81.433	41.521	8.4297
696	Male	72.76	RS1	154.1	95.541	18.838	20.265	98.152	35.621	125.24	54.932	49.2	59.326	54.932	58.8	107.44	28.753	9.4199	67.072	26.887	14.435	94.763	29.994	64.478	92.074	2.2841	17.445	87.511	18.339	5.1806
697	Female	65.87	RS1	145.51	103.06	30.179	23.155	119.54	23.341	107.18	64.209	39.6	48.584	71.533	36.4	96.199	52.187	4.9253	57.506	57.121	5.0198	74.318	45.713	40.556	72.626	34.042	3.1803	76.849	48.272	2.8115
698	Male	66.41	RS1	149.52	94.748	25.521	17.833	104.05	35.989	113.04	52.002	43.6	49.561	56.885	48.4	97.705	29.101	7.6987	55.64	31.428	10.683	80.647	26.53	52.226	76.732	3.9629	12.566	76.566	20.797	2.9217
699	Male	67.29	RS1	156.07	106.93	39.376	23.297	98.788	31.224	120.36	64.697	61.2	58.35	61.768	58	111.73	37.243	24.019	73.711	34.867	21.755	90.491	41.567	70.56	95.433	9.6671	31.33	93.934	25.354	16.254
700	Male	79.25	RS1	150.56	79.256	42.899	21.155	79.795	40.57	117.92	52.978	80.4	52.978	52.978	81.2	108.18	22.311	53.732	60.72	21.875	53.759	85.412	34.701	97.494	86.149	1.7421	68.274	85.39	11.588	51.706
701	Male	72.81	RS1	142.99	89.364	31.894	9.182	97.455	37.15	109.13	55.42	58	44.189	60.303	62.8	93.259	26.589	20.126	50.044	30.029	22.503	76.679	31.062	72.898	70.028	3.1214	28.661	70.02	17.377	12.026
702	Male	71.38	RS1	157.29	104.41	35.156	31.516	96.366	21.154	125.24	60.791	48.4	63.232	55.42	40.4	121.75	36.94	10.505	84.199	31.745	6.129	94.476	34.368	53.081	103.21	8.6581	12.521	104.55	26.168	2.4126
703	Female	69.04	RS1	156.49	109.39	30.928	25.309	109.39	24.339	123.78	71.045	46.8	58.838	69.58	42.8	111.73	50.064	4.98	73.78	49.562	4.6675	91.57	43.045	46.674	93.106	28.527	5.9665	93.441	43.324	-1.2746
704	Male	65.61	RS1	160.02	104.27	37.792	21.496	100.76	26.736	122.8	58.838	53.2	55.42	56.396	48.4	114.02	38.239	13.686	72.346	36.669	10.002	89.466	34.133	63.619	93.363	8.1336	19.146	93.101	28.387	4.689
705	Female	68.6	RS1	151.24	96.631	30.929	30.485	88.977	31.031	122.31	56.885	41.2	64.697	54.932	42	108.34	43.601	5.5307	78.453	41.946	5.1411	95.038	32.999	41.279	94.784	19.882	5.4947	93.601	36.443	2.2182
706	Male	67.93	RS1	154.15	96.665	26.736	22.252	92.987	26.553	123.78	55.42	49.2	57.861	51.025	48.4	109.14	34.259	7.5884	73.771	31.585	6.2766	92.498	27.349	60.206	95.056	3.7997	12.54	92.672	23.781	1.0698
707	Female	66.95	RS1	156.81	98.963	21.714	26.28	98.996	19.718	124.27	53.467	37.2	61.279	52.978	37.2	109.89	36.691	5.3904	73.163	36.369	5.0443	92.838	27.173	41.903	92.35	15.567	5.3303	92.707	31.228	3.2798
708	Male	67.61	RS1	148.17	104.05	22.803	20.845	96.732	38.693	117.43	64.697	42	57.373	61.768	52.4	101.74	42.374	5.5172	64.032	39.003	8.077	90.714	32.195	53.011	85.959	13.454	9.5341	82.941	31.652	1.7843
709	Male	67.71	RS1	151.87	98.811	30.909	22.895	108.07	25.954	114.5	62.256	45.2	54.443	66.65	42.8	103.09	45.075	5.8996	66.499	47.513	6.2981	82.574	40.76	54.082	83.735	20.286	10.32	85.253	38.27	1.1368
710	Male	65.59	RS1	151.78	100.41	18.849	22.364	94.596	17.562	119.38	54.932	30	58.838	52.002	28.4	106.07	43.947	4.8773	72.683	43.284	3.1109	89.672	31.31	35.965	89.987	22.723	-0.5257	90.438	40.048	1.0906
711	Male	65.64	RS1	158.05	97.993	32.985	25.112	96.014	25.69	121.34	56.885	52.4	58.838	57.373	49.2	115.76	38.168	10.663	73.848	36.603	8.3207	91.23	31.721	56.056	96.688	9.1329	10.772	96.223	29.795	3.0808
712	Male	67.13	RS1	157.1	102.44	40.196	25.915	85.545	43.082	129.15	65.186	70.8	65.186	57.373	72.4	117.63	36.501	32.412	80.598	30.611	34.506	100.31	40.837	83.686	103.88	8.0939	41.747	100.78	23.323	27.941
713	Male	66.75	RS1	161.18	103.45	32.095	24.978	102.13	28.473	125.24	60.303	42.8	60.303	58.838	41.2	111.31	39.753	4.0379	75.868	38.637	3.6947	92.72	27.717	44.424	91.3	14.073	4.7624	93.596	33.497	-0.25641
714	Male	65.81	RS1	155.19	99.233	23.365	23.534	102.38	24.076	119.38	55.42	40.4	56.885	57.861	40.4	109.57	35.868	6.8571	64.454	37.651	6.9401	85.11	32.809	49.553	86.895	7.5026	12.302	86.669	27.576	1.8517
715	Female	68.22	RS1	150.84	105.36	20.386	31.122	103.17	27.397	120.85	64.209	34	61.768	63.721	37.2	106.86	50.49	5.0933	74.515	48.209	5.1008	92.972	40.128	39.579	91.363	29.756	3.4968	90.527	42.384	2.5834
716	Male	68.07	RS1	143.05	94.356	25.918	16.522	104.18	25.451	109.13	55.42	47.6	44.189	60.791	46.8	94.526	35.256	8.3272	53.001	39.095	9.2784	73.852	36.586	53.621	72.21	12.41	10.414	72.878	29.467	2.1423
717	Female	65.88	RS1	152.08	92.86	37.887	15.738	94.313	43.676	115.97	57.861	67.6	52.978	58.35	70	99.79	29.037	30.583	63.891	30.864	32.774	84.809	32.551	77.672	80.785	7.6191	39.109	80.548	24.817	26.507
718	Male	65.18	RS1	155.85	90.056	26.762	13.758	102.59	26.51	117.92	49.561	45.2	45.166	53.955	42.8	99.586	29.66	5.8203	59.998	31.611	5.7247	79.393	26.939	49.082	77.495	4.307	8.1951	79.043	22.272	0.62221
719	Female	66.48	RS1	147.32	116.93	32.151	19.962	108.27	41.051	117.43	74.951	51.6	56.885	71.045	54.8	100.19	52.701	10.371	67.885	49.576	12.145	88.118	46.079	57.414	85.518	25.702	14.887	83.169	43.875	3.9674
720	Male	65.53	RS1	160.49	98.264	37.67	17.908	94.028	31.322	122.31	59.326	59.6	57.861	56.885	57.2	111.82	41.193	16.926	74.354	38.692	15.077	91.605	34.619	67.98	94.447	13.242	22.213	94.447	31.938	10.867
721	Male	70.37	RS1	154.82	98.647	29.392	23.111	96.264	31.985	118.9	63.721	51.6	59.814	60.791	53.2	110.57	39.324	13.063	69.754	37.384	14.405	90.021	33.333	58.415	91.464	10.987	14.668	90.665	30.245	5.3894
722	Male	65.05	RS1	148.2	98.178	32.788	20.957	104.66	40.193	114.01	63.232	59.6	53.955	66.162	62	94.933	40.668	23.294	61.815	39.997	23.185	82.47	41.585	73.183	80.077	14.828	29.701	77.973	30.564	16.893
723	Male	66.68	RS1	161.25	104.26	22.4	25.111	98.356	22.949	129.15	55.42	32.4	59.814	51.514	34	115.36	40.196	4.3876	74.173	38.32	3.5964	96.771	28.448	36.586	96.57	15.082	2.4794	95.485	33.866	1.8437
724	Female	65.76	RS1	149.87	96.991	30.955	26.455	103.88	31.629	116.94	55.908	46	53.955	60.791	46	103.05	39.979	8.6517	65.901	42.519	8.6453	85.156	39.991	51.96	85.242	13.202	14.505	85.487	32.468	2.1765
725	Female	61.43	RS1	148.28	103.01	19.436	23.023	98.9	22.647	117.43	58.838	31.6	56.396	56.885	34	104.8	46.149	2.1456	66.966	46.214	2.3229	89.079	36.013	36.453	87.636	28.095	1.5579	87.727	41.868	0.42613
726	Female	67.11	RS1	144.89	111.99	29.324	26.482	106.97	35.255	117.92	69.58	45.2	58.35	67.139	50.8	104.73	54.801	7.3934	67.479	52.808	9.9153	88.659	44.506	50.378	86.114	29.202	9.0069	85.34	46.792	1.9267
727	Male	65.84	RS1	155.46	105.58	17.318	25.284	102.59	18.457	121.83	64.697	31.6	59.326	62.256	31.6	109.08	43.182	5.5299	73.674	41.782	5.241	92.196	35.555	39.368	92.656	15.396	5.6448	91.402	34.666	2.5874
728	Female	67.1	RS1	153.32	101.66	30.867	27.883	90.758	32.394	125.24	57.373	50	60.791	53.955	50.8	109.81	39.69	10.057	77.766	35.903	10.863	95.348	31.876	58.333	96.913	12.902	13.021	93.752	32.137	3.2035
729	Male	74.65	RS1	143.02	94.139	21.73	14.63	108.35	35.553	107.67	55.908	43.6	45.166	63.232	52.4	88.146	34.235	5.7535	47.608	38.257	8.7453	74.598	37.281	58.956	66.518	9.7847	12.673	66.217	27.17	1.5645
730	Female	66.05	RS1	153.82	107.52	24.268	26.626	114.81	24.986	117.43	65.186	36.4	53.955	68.603	37.2	106.09	56.085	3.1789	66.573	57.441	3.4405	85.463	43.897	40.6	86.952	35.304	4.5701	86.574	52.27	1.1335
731	Female	66.5	RS1	161.63	103.3	34.116	33.048	91.417	27.06	130.13	65.186	48.4	70.557	58.838	45.2	121.76	41.412	8.7477	85.089	37.507	6.5544	101.16	39.342	52.771	105.38	15.729	10.093	104.51	32.349	1.0323
732	Female	65.2	RS1	156.36	101.96	37.752	19.986	102.24	33.833	119.38	59.814	55.6	55.908	59.814	54	106.21	40.347	13.662	69.822	40.677	12.245	86.879	36.72	62.633	86.716	16.034	19.905	87.074	32.859	8.1635
733	Female	67.07	RS1	143.57	107.09	27.16	26.451	107.11	30.024	114.5	68.115	42.8	56.885	65.674	43.6	101.1	50.539	2.6436	68.556	49.578	3.7418	85.727	42.673	45.927	84.406	28.621	4.6157	85.368	43.428	0.15468
734	Male	68.76	RS1	160.84	100.09	25.901	24.471	97.366	23.035	125.73	47.607	38.8	60.791	45.654	35.6	108.92	29.743	4.7465	74.785	27.836	4.6719	90.934	22.845	44.003	90.524	1.8003	5.9917	91.484	20.414	0.52155
735	Male	65.62	RS1	154.65	99.316	43.549	25.989	98.839	36.031	119.38	60.303	71.6	58.838	59.326	69.2	114.47	30.338	32.322	73.919	28.527	30.688	89.731	32.856	80.362	94.547	3.703	36.014	94.988	20.476	22.348
736	Female	64.92	RS1	150.06	111.97	25.516	28.727	97.906	30.77	124.27	65.186	42.8	63.721	58.838	45.2	109.68	47.482	5.4078	78.967	43.668	6.8967	97.004	39.5	48.322	95.728	24.02	7.4764	94.903	39.831	0.78809
737	Male	66.79	RS1	159.08	98.391	27.583	27.06	93.706	17.05	123.78	54.443	40.4	64.209	52.002	34.8	113.66	37.686	4.137	81.462	36.576	5.0681	94.534	30.31	41.4	98.377	16.202	5.1742	98.938	31.608	2.7284
738	Female	66.08	RS1	148.11	97.557	26.322	22.87	107.17	26.942	114.5	60.303	46.8	50.049	65.674	45.2	96.706	40.321	9.2079	64.359	44.106	9.0712	80.45	41.338	50.728	78.044	22.299	13.378	78.927	35.948	4.2133
739	Male	66.42	RS1	160.19	100.43	24.454	24.463	96.148	24.052	126.22	49.072	34	57.861	50.049	34.8	110.93	40.248	4.4484	71.504	40.129	4.2098	91.51	28.701	37.426	89.533	15.998	2.8711	91.733	35.031	0.24758
740	Female	65.43	RS1	159.46	91.455	49.186	29.816	76.641	43.331	126.71	54.443	74.8	65.674	49.561	71.6	116.16	25.886	40.457	81.313	22.85	38.235	98.048	33.309	82.697	98.634	4.8133	48.277	98.972	15.769	33.914
741	Male	64.88	RS1	152.83	90.319	35.022	23.752	92.595	32.107	118.9	46.143	54.8	56.396	47.607	52.4	105.72	24.015	13.368	67.69	25.275	14.16	86.42	23.998	61.45	85.873	2.3795	22.034	87.326	15.081	7.3449
742	Female	65.45	RS1	146.96	89.863	40.484	24.3	96.242	37.343	112.55	53.955	61.2	53.467	58.35	59.6	95.983	33.041	20.686	62.957	35.893	20.936	81.007	35.521	67.26	77.703	12.773	27.172	78.008	26.337	15.555
743	Female	65.93	RS1	156.76	99.398	38.517	31.854	85.434	38.804	128.17	62.744	62	66.162	57.373	62	115.87	39.579	27.113	80.115	36.477	27.764	98.683	38.778	70.837	96.675	14.591	34.92	98.164	29.693	22.721
744	Female	70.62	RS1	141.25	102.13	30.339	22.42	105.62	33.985	113.04	62.744	54.8	51.514	63.721	55.6	96.771	41.134	20.332	62.185	42.706	20.495	82.112	38.567	63.263	78.154	19.759	22.99	78.116	34.178	12.526
745	Male	65.68	RS1	159.62	101.78	21.865	23.884	105.64	18.057	122.8	54.932	38.8	56.885	55.42	35.6	110.08	41.88	3.7613	71.351	43.255	3.3297	88.681	35.604	40.585	89.796	21.358	2.5346	91.413	36.249	0.69161
746	Male	66.83	RS1	155.95	105.04	27.563	29.312	87.27	30.269	130.13	62.256	46.8	68.115	52.49	48.4	119.97	37.917	10.912	82.948	30.233	10.045	103.34	30.446	58.117	107.32	3.7678	18.979	102.65	25.424	5.3533
747	Female	65.48	RS1	160.48	115.58	25.417	36.609	98.467	20.346	135.5	62.744	34.8	74.463	57.373	32.4	127.53	51.309	5.3992	88.315	46.013	5.8833	107.46	34.55	37.735	110.05	30.958	4.7561	108.23	46.059	4.3615
748	Female	66.74	RS1	150.8	93.273	44.843	28.669	101.7	34.69	117.92	61.768	63.6	55.908	66.162	58.8	103.29	38.18	18.828	69.426	40.466	16.691	85.015	38.845	67.034	83.323	17.908	23.103	85.268	31.798	10.602
749	Male	75.64	RS1	151.31	105.24	32.236	23.153	95.801	37.785	122.31	56.885	53.2	60.303	52.978	57.2	109.85	33.302	13.516	70.572	30.145	13.441	92.448	26.72	63.488	91.354	2.1967	20.531	89.449	20.995	7.2121
750	Male	65.56	RS1	153.63	97.331	26.019	13.769	105.2	30.011	112.06	58.838	46.8	51.025	63.721	49.2	97.676	41.612	10.742	59.856	44.204	11.034	79.493	38.167	60.742	76.269	14.691	16.348	77.347	33.685	6.117
751	Male	78.05	RS1	154.08	90.193	30.666	15.446	94.634	40.371	115.97	52.49	54.8	52.49	53.955	59.6	100.59	25.236	24.106	57.147	28.145	27.448	83.628	28.179	68.163	75.433	3.448	28.371	76.276	18.43	14.597
752	Male	66.84	RS1	150.15	98.74	32.495	23.257	101.14	41.71	118.41	60.791	58.8	55.42	63.232	62	98.052	38.888	18.558	60.929	39.922	20.966	84.893	37.907	71.191	76.988	11.927	25.746	77.855	30.241	13.827
753	Female	68.15	RS1	151.79	94.136	36.705	25.023	97.996	28.57	117.92	53.955	57.2	53.467	57.373	53.2	103.43	34.977	21.768	67.776	35.799	17.763	84.077	35.541	62.05	85.068	14.385	25.393	85.378	28.261	13.966
754	Male	74.35	RS1	159.55	98.222	38.469	23.057	94.269	37.189	124.76	60.303	63.6	62.256	56.885	61.2	116.47	30.932	25.077	72.063	29.166	23.75	94.454	32.365	75.544	96.247	3.7244	32.179	94.891	19.957	18.429
755	Female	66.9	RS1	157.62	114.82	22.997	27.992	99.935	23.459	130.62	66.65	39.6	66.65	58.838	38.8	118.73	47.822	5.4018	86.186	42.639	4.6461	101.9	41.874	45.08	105.8	26.681	6.1304	103.45	40.027	1.4319
756	Male	73.1	RS1	161.18	107.95	34.213	25.824	98.764	26.882	128.66	56.396	44.4	61.768	53.467	41.2	116.84	35.051	9.5022	76.415	33.476	8.3727	95.855	31.644	51.177	96.451	7.1102	11.939	97.366	25.858	2.4111
757	Female	64.98	RS1	159.56	111.43	34.192	36.474	102.55	29.257	128.17	68.603	44.4	69.58	65.186	43.6	118.31	50.204	5.3587	84.145	47.373	5.0684	99.203	41.271	44.924	102.66	27.602	6.7494	102.22	42.571	0.14715
758	Female	68.54	RS1	152.01	110.62	26.487	23.862	114.69	31.566	120.85	69.58	42	57.373	72.51	45.2	104.81	51.574	7.1206	68.804	52.502	8.2601	89.212	44.805	48.739	87.164	29.105	11.104	86.306	45.345	2.0459
759	Female	64.35	RS1	153.84	107.16	30.116	32.61	95.049	38.946	127.69	65.186	49.2	69.58	62.744	54	116.91	43.954	13.629	81.119	39.173	14.136	102.05	36.91	58.504	101.85	15.403	14.794	99.29	33.063	4.1768
760	Female	87.96	RS1	153.98	105.98	49.947	29.13	92.948	47.361	126.71	73.486	74	62.744	63.232	71.6	115.99	42.958	42.885	80.813	38.694	41.418	95.976	47.659	84.769	100.23	20.085	49.521	99.426	33.987	36.284
761	Male	72.73	RS1	153.97	106.23	33.61	25.73	105.87	31.872	121.34	65.186	46	57.373	63.721	45.2	111.54	50.023	7.0063	68.664	49.663	5.0368	90.6	37.446	50.218	91.606	26.47	5.173	89.564	42.974	3.3712
762	Male	66.04	RS1	150.4	112.93	28.734	23.456	110.85	29.516	119.38	62.256	43.6	51.514	62.256	43.6	105.57	46.958	5.5403	69.083	47.55	4.5978	85.406	35.638	52.594	90.165	19.132	7.4462	87.887	40.273	0.0188
763	Female	81.29	RS1	153.34	102.99	35.046	31.301	88.464	51.652	128.66	70.557	70	71.533	66.162	77.2	116.55	40.996	34.859	79.984	34.624	38.52	103.05	45.491	81.4	102.14	12.604	43.95	98.43	30.618	30.312
764	Male	73.12	RS1	153.06	97.944	24.401	18.733	95.676	29.886	119.38	51.025	47.6	55.42	50.049	53.2	107.26	26.451	12.379	62.1	26.022	15.202	88.314	28.314	59.751	84.691	2.2961	18.345	83.307	17.471	6.7056
765	Female	72.53	RS1	153.86	90.691	42.209	26.487	94.888	37.938	118.9	53.955	67.6	54.932	55.42	65.2	106.28	31.535	31.174	69.547	32.386	29.935	85.701	35.121	78.624	88.116	10.641	40.914	87.878	24.72	27.57
766	Male	78.21	RS1	155.56	94.955	38.704	25.348	89.951	30.952	120.36	48.096	60.4	56.396	47.119	57.2	113.84	25.531	23.115	67.137	24.345	18.304	87.78	26.517	69.532	92.325	3.3034	25.991	90.647	17.565	12.83
767	Female	82.19	RS1	151.57	99.574	38.959	23.874	98.887	43.993	119.87	62.744	62	56.396	63.232	66	105.69	37.353	27.003	70.063	37.007	27.509	89.585	42.034	74.775	88.01	14.07	34.038	87.282	30.751	20.003
768	Female	62.12	RS1	149.84	108.39	41.466	24.313	106.85	40.004	118.41	72.998	62.8	54.932	72.021	62.8	103.98	50.642	29.971	69.142	49.893	29.506	86.786	53.13	68.92	86.933	32.943	35.907	86.589	44.458	25.619
769	Male	62.24	RS1	153.82	107.05	34.291	24.963	113.53	28.784	120.36	62.744	48.4	53.955	64.209	46	107.77	45.628	6.7373	69.352	46.973	7.0201	86.635	38.94	54.454	86.9	18.326	10.724	89.954	37.938	3.8713
770	Female	83.47	RS1	146.87	96.734	35.929	26.355	110.86	34.058	113.53	62.744	60.4	54.932	68.603	59.6	97.581	36.97	25.86	65.573	40.448	24.937	81.197	39.518	65.176	78.442	15.657	29.869	81.579	33.04	18.772
771	Male	68.77	RS1	154.02	103.9	39.593	25.76	104.72	30.763	121.83	61.768	54	55.908	61.279	50.8	111.08	41.625	15.767	71.94	42.674	14.94	88.493	39.868	63.514	91.7	14.079	22.941	92.257	32.744	9.8623
772	Male	70.46	RS1	152.09	102.59	34.851	26.611	101.68	35.835	119.87	61.279	55.6	59.814	61.768	57.2	107.57	43.166	16.038	71.16	43.333	16.033	89.916	39.825	67.604	89.047	18.869	17.742	89.67	35.832	7.0342
773	Female	71.46	RS1	155.06	100.22	35.343	24.289	98.597	30.934	121.83	60.791	51.6	55.42	61.279	50	106.68	43.625	11.522	72.511	41.752	10.62	87.868	38.205	56.125	90.473	18.665	14.144	89.994	36.441	4.5624
774	Male	76.25	RS1	156.6	100.3	43.842	24.469	99.089	38.988	119.38	61.768	70.8	59.326	62.744	68.4	110.74	36.313	31.023	68.658	36.823	30.16	88.763	38.398	77.252	89.995	13.973	35.718	89.812	29.844	22.08
775	Male	67.68	RS1	159.68	96.652	38.281	19.754	100.68	26.448	117.43	55.908	56.4	52.49	57.861	51.6	110.19	36.765	14.725	63.222	38.017	12.989	83.541	35.82	63.134	86.023	8.7573	19.697	86.951	28.501	6.4964
776	Female	61.93	RS1	152.79	107.54	41.16	30.542	95.25	36.414	128.17	59.814	62.8	65.674	53.467	60.4	118.81	39.15	22.703	84.067	33.581	20.603	99.744	36.578	67.68	103.86	14.723	25.761	101.83	30.336	15.914
777	Male	65.63	RS1	148.99	103.03	30.042	17.816	112.88	35.73	112.55	60.303	49.2	50.049	66.162	53.2	98.72	37.538	9.9947	57.622	39.865	11.824	80.515	37.621	57.896	76.7	12.877	14.669	77.31	31.434	4.2208
778	Male	62.81	RS1	155.5	98.131	42.456	20.326	103.69	33.026	118.9	55.42	53.2	54.443	58.35	48.4	107.12	38.398	7.737	66.004	40.196	6.3579	85.422	31.815	56.064	84.551	12.439	9.508	86.436	31.386	0.35296
779	Male	79.68	RS1	149.3	112.91	39.594	30.984	102.72	46.063	125.73	69.58	66.8	62.256	64.209	71.6	114.98	48.948	24.272	76.209	43.658	25.976	96.7	43.776	78.984	100.59	19.451	31.835	96.639	37.824	17.765
780	Female	79.26	RS1	147.24	90.731	48.445	23.298	97.451	36.228	114.5	56.396	64.4	51.514	60.791	59.6	102.43	31.332	23.579	64.115	33.051	20.718	80.493	28.784	67.589	82.747	8.9166	24.851	83.733	26.804	15.602
781	Female	76.9	RS1	154.87	105.52	30.968	31.205	100.53	29.913	124.27	67.139	46	66.65	64.697	46	110.4	46.912	5.7086	77.928	46.436	6.2382	96.378	41.479	49.218	94.614	24.149	6.7113	93.53	40.831	0.060886
782	Female	69.65	RS1	154.59	101.61	29.941	27.513	94.646	36.106	122.31	54.932	49.2	62.256	52.978	52.4	107.29	35.7	9.7458	77.102	34.141	10.725	93.721	25.948	57.355	94.672	9.8272	13.67	93.117	27.324	3.6118
783	Female	77.61	RS1	151.85	108.93	39.434	28.619	102.78	37.108	120.85	71.045	54	61.768	67.627	53.2	116.25	52.322	13.265	74.302	48.636	11.948	93.459	43.587	56.738	97.699	27.18	15.253	96.608	44.846	4.9152
784	Male	84.31	RS1	156.38	114.41	33.761	26.196	111.16	32.542	125.24	72.998	55.6	60.791	72.51	54.8	112	55.347	10.99	72.928	54.898	11.097	92.408	49.911	59.14	95.621	27.301	15.45	92.734	47.431	3.3886
785	Male	79.05	RS1	152.52	100.17	46.938	18.13	100.74	53.038	118.9	56.396	74.8	54.443	56.396	79.6	105.36	30.909	41.559	65.794	29.51	44.665	87.996	39.041	90.896	88.862	4.6835	50.604	86.61	18.401	36.882
786	Male	65.79	RS1	155.47	105.05	29.361	27.252	103.01	30.088	125.24	54.932	49.2	56.396	53.955	48.4	107.16	36.079	11.067	71.128	35.409	10.094	90.217	34.033	59.327	88.462	8.6133	16.799	87.753	26.798	5.8569
787	Female	66.88	RS1	156.81	113.22	28.703	23.659	94.391	38.542	130.62	72.021	46.8	65.186	62.256	52.4	113.76	51.089	7.9656	80.41	44.956	10.335	102.6	42.473	54.722	101.49	27.929	11.586	97.993	43.508	3.7731
788	Female	79.76	RS1	160.33	108.02	28.862	34.943	96.661	24.17	131.59	63.721	43.6	72.998	57.373	41.2	125.93	47.506	5.7306	87.025	41.972	5.4879	104.26	36.931	49.688	109.75	22.941	7.5308	108.72	38.396	2.0625
789	Male	65.08	RS1	153.5	104.54	23.626	21.047	105.3	30.454	119.87	55.42	32.4	55.42	54.443	36.4	104.42	41.498	4.9214	63.348	43.745	5.1201	87.781	30.783	38.759	83.948	22.544	5.2186	84.431	38.717	3.3463
790	Female	78.02	RS1	145.93	92.459	39.505	22.063	106.23	31.622	108.64	56.885	61.2	46.631	66.162	56.4	94.77	39.219	14.134	60.031	44.156	12.478	74.891	38.754	65.806	73.559	16.154	19.444	76.555	34.132	6.762
791	Female	66.55	RS1	154.73	102.66	29.294	29.605	98.426	28.289	125.73	59.326	40.4	62.256	57.861	38.8	112.03	41.43	5.4284	75.314	40.081	5.3756	95.086	32.733	41.279	93.952	22.059	4.5736	94.049	35.686	1.4924
792	Female	76.88	RS1	146.41	93.888	39.071	25.509	104.2	33.554	112.06	55.42	57.2	51.025	59.814	54	97.584	37.54	22.044	63.619	40.156	20.505	80.053	36.758	64.01	79.463	16.171	25.806	80.642	32.719	14.562
793	Female	66.39	RS1	147.61	102.39	36.522	22.044	100.9	46.468	117.92	67.139	62	55.908	67.139	66	104.23	45.71	27.129	66.252	44.652	29.543	88.485	46.132	74.419	86.271	19.968	33.533	84.742	36.341	20.666
794	Male	79.71	RS1	157.16	99.194	33.02	24.304	92.126	28.287	125.24	52.978	45.2	58.838	48.584	43.6	112.29	29.561	6.5035	73.551	27.285	6.6296	92.958	23.371	55.821	93.366	2.018	13.052	92.596	20.141	1.9946
795	Male	68.64	RS1	159.12	108.97	37.265	22.708	96.041	36.923	129.15	59.814	56.4	61.768	53.955	55.6	121.57	38.379	22.857	75.014	33.578	20.002	97.202	35.875	63.183	100.48	8.9336	26.316	99.216	28.019	14.589
796	Male	63.19	RS1	149.17	96.421	37.744	19.405	107.31	36.453	112.55	59.326	55.6	49.072	64.697	55.6	100.18	37.665	16.62	57.141	41.304	14.896	78.575	36.623	63.52	77.153	12.266	20.498	77.402	31.407	8.8661
797	Female	61.39	RS1	153.29	102.07	38.384	28.944	100.77	33.687	120.85	62.744	57.2	59.326	61.768	56.4	110.88	43.113	17.98	74.749	41.876	15.714	90.361	41.252	60.838	93.471	21.868	21.004	93.012	37.145	10.457
798	Female	61.45	RS1	151.17	114.88	44.235	28.995	104.38	31.705	120.36	74.951	50.8	63.232	72.021	46	115.3	60	9.3974	81.342	56.029	6.5722	94.244	47.592	51.244	100.59	35.813	9.4424	99.856	52.864	1.5568
799	Female	62.35	RS1	148.47	114.66	26.929	27.935	110.95	31.494	119.38	70.557	39.6	57.373	70.557	42	102.56	56.565	4.8247	70.575	55.643	4.9449	88.865	48.078	47.143	88.334	29.912	7.8732	86.647	49.382	0.79728
800	Female	62.23	RS1	154.51	107.31	36.935	22.068	105.84	34.269	119.87	66.162	55.6	55.908	67.139	54.8	106.96	48.563	12.596	69.108	48.25	12.425	87.974	41.632	59.448	88.656	26.302	15.077	88.384	42.827	5.7056
801	Female	61.85	RS1	145.66	109.12	31.622	30.186	109.84	39.897	117.92	75.439	50	60.791	74.951	54	103.6	58.567	9.1021	68.781	58.344	11.109	90.386	52.511	57.354	86.737	35.623	13.196	85.659	51.503	3.3416
802	Female	61.92	RS1	144.78	95.951	34.206	20.792	100.79	34.475	115.48	56.396	51.6	49.561	58.838	53.2	99.229	31.498	12.445	61.049	32.873	13.549	83.033	34.002	57.776	79.077	6.7641	18.336	78.594	24.914	6.2979
803	Male	62.92	RS1	155.83	97.809	36.254	25.995	106.78	36.502	121.34	59.326	57.2	53.467	63.232	58	105.95	32.975	17.407	65.26	35.016	17.097	87.455	33.04	70.112	85.491	4.8618	24.845	85.278	23.629	11.648
804	Female	62.78	RS1	154.5	117.31	25.287	26.194	109.34	34.057	124.76	71.045	40.4	63.721	67.627	46.8	110.57	54.125	5.6683	75.355	50.886	7.8487	96.804	47.648	47.233	95.221	33.219	8.9801	93.07	46.97	0.95305
805	Male	61.92	RS1	147.72	99.814	30.905	26.379	115.12	27.235	109.62	58.35	40.4	52.002	66.65	40.4	96.289	46.996	4.9282	64.07	49.94	4.7087	77.771	39.541	43.281	78.032	24.908	5.1285	80.645	40.684	2.702
806	Female	62.67	RS1	157.2	103.47	40.89	29.189	100.49	33.875	125.24	64.209	60.4	62.256	62.256	58	113.79	42.621	24.803	76.366	40.631	23.034	93.543	39.632	68.296	95.534	15.323	32.844	94.342	31.898	19.737
807	Male	62.32	RS1	158.01	94.566	31.681	27.251	94.374	22.861	122.31	55.42	50	60.791	55.42	43.6	113.29	30.168	12.286	74.608	30.605	10.109	91.009	28.04	52.626	92.924	4.5808	15.436	93.561	20.98	6.4641
808	Male	61.32	RS1	154.79	99.775	34.911	27.346	112.74	28.835	114.01	56.885	46.8	56.396	63.721	42.8	104.12	40.193	5.4405	66.984	44.763	5.2059	81.954	34.657	51.702	84.082	13.72	9.4221	85.391	32.695	3.5311
809	Female	61.61	RS1	154.67	104.25	37.591	28.206	96.879	25.904	120.85	64.209	48.4	62.256	61.279	43.6	113.69	44.378	10.065	79.326	41.732	7.2954	92.766	37.272	50.731	97.615	18.684	8.3482	97.408	36.99	1.9911
810	Female	61.96	RS1	155.68	104.74	44.102	29.559	100.71	44.402	123.29	66.162	67.6	61.279	65.186	68.4	110.86	41.47	33.08	74.994	39.493	31.61	93.028	41.825	75.957	92.811	20.249	41.641	92.914	31.405	30.548
811	Female	62.78	RS1	154	100.63	31.981	26.67	98.286	41.095	124.27	56.885	54	62.256	54.932	58.8	107.77	35.306	17.857	73.56	34.371	21.308	93.626	33.739	63.069	92.109	10.411	24.756	90.468	27.1	13.318
812	Female	62.01	RS1	148.4	103.09	32.779	24.541	115.8	29.673	112.06	64.697	44.4	51.514	70.068	42.8	100.4	54.149	5.4993	64.927	57.342	6.1753	80.066	41.671	42.18	81.507	31.91	7.0358	82.987	49.811	3.6078
813	Female	61.82	RS1	156.05	108.23	42.106	26.397	100.64	34.268	123.29	60.791	58.8	59.814	56.885	54.8	112.5	42.051	15.08	76.183	39.85	12.535	92.866	39.391	64.005	95.491	16.727	19.852	94.621	33.199	7.7916
814	Male	61.78	RS1	153.5	103.56	41.546	22.43	95.148	32.389	115.97	66.65	66	56.885	62.744	62	108.79	38.89	31.766	67.597	38.069	27.526	86.818	43.463	77.099	87.489	11.621	36.599	88.681	27.521	23.229
815	Male	62.65	RS1	156.73	112.5	35.234	27.832	103.34	29.943	124.27	63.721	50	62.256	58.838	48.4	113.91	48.024	7.2955	77.494	45.664	6.7508	94.373	33.392	51.163	96.531	20.66	8.3044	97.915	39.772	1.3501
816	Female	63.17	RS1	149.17	108.22	36.34	23.928	106.32	39.57	116.94	67.627	52.4	56.396	67.627	53.2	102.34	51.002	12.559	68.633	51.316	13.306	87.051	44.129	58.487	85.514	27.167	15.964	84.576	45.148	6.9723
817	Female	61.9	RS1	156.14	106.33	37.227	30.038	101.52	43.606	125.73	62.744	58	66.162	60.303	59.6	113.23	43.128	19.257	78.028	41.068	20.451	97.731	40.191	65.421	97	20.091	25.291	94.975	35.334	13.801
818	Female	61.13	RS1	158.32	103.23	31.611	31.595	89.426	23.579	129.15	51.514	45.2	68.603	44.189	42	118.94	39.903	5.2506	83.335	36.436	5.7183	100.38	23.044	47.424	103.79	12.861	6.3174	102.47	32.684	1.4276
819	Female	61.93	RS1	153	115.69	20.135	28.643	107.8	25.445	125.24	73.486	32.4	63.721	68.115	35.6	114.59	60.064	4.4542	72.571	56.725	5.1417	97.822	42.649	33.378	96.794	38.194	2.2022	94.716	54.93	2.9089
820	Male	61.86	RS1	165.17	106.03	23.456	20.512	100.63	22.635	128.66	60.791	47.6	58.35	58.838	47.6	113.57	34.355	7.7367	71.67	33.4	6.8764	93.817	34.111	57.302	92.854	5.3585	12.264	92.094	23.797	1.314
821	Male	62.89	RS1	153.34	95.524	38.12	24.667	90.123	30.413	120.36	55.908	62.8	55.908	53.955	58	111.91	28.52	21.387	68.512	26.462	20.22	87.616	28.877	69.412	90.88	3.3983	30.362	91.012	17.495	16.138
822	Male	61.7	RS1	152.34	109.95	25.7	24.206	101.94	30.577	126.22	65.186	52.4	56.396	62.256	54.8	111.08	44.793	15.031	70.476	40.353	15.916	92.119	43.89	61.463	93.637	15.183	22.007	91.47	32.878	9.1329
823	Male	61.07	RS1	153.44	92.7	40.475	23.453	98.606	37.132	115.48	52.002	63.6	53.467	56.396	62	102.75	30.857	19.629	65.48	35.353	18.658	82.264	28.427	69.794	80.202	4.9473	22.131	83.036	22.98	10.408
824	Female	61.95	RS1	147.42	103.98	40.595	23.871	102.31	41.24	112.55	68.115	61.2	57.373	65.674	63.6	102.13	44.48	25.047	72.287	42.546	25.641	86.799	47.173	68.932	91.001	23.789	32.95	88.496	36.171	20.825
825	Female	61.88	RS1	152.99	107.99	34.775	26.854	103.91	35.114	123.29	63.721	52.4	57.373	62.256	51.6	110.92	48.191	12.29	71.697	47.675	11.229	90.396	42.105	55.326	91.772	24.622	15.367	92.156	40.736	5.0149
826	Female	62.48	RS1	154.87	108.72	38.673	22.666	104.27	38.942	123.29	67.627	58.8	59.326	65.186	59.6	113.21	44.767	23.843	71.609	42.477	23.566	92.299	43.429	63.626	93.49	19.39	28.642	92.735	35.89	16.961
827	Male	62.57	RS1	155.78	104.07	26.64	19.733	102.96	27.19	122.31	54.932	42.8	54.932	56.396	43.6	105.42	37.274	7.1261	69.304	37.893	7.5581	88.857	31.448	53.533	89.04	11.386	9.4377	87.1	28.712	4.6452
828	Female	62.65	RS1	150.75	101.65	42.617	35.415	104.93	28.932	122.31	63.721	58	58.35	64.697	49.2	112.99	42.68	19.924	74.435	42.813	14.284	88.984	40.413	62.614	91.641	18.989	21.27	93.623	35.215	10.466
829	Male	61.05	RS1	164.78	104.14	24.722	28.554	90.39	29.251	135.5	60.791	36.4	67.627	52.978	40.4	121.49	42.188	5.5148	81.781	35.691	5.3357	104.31	33.36	43.824	106.33	9.1505	9.2451	103.16	29.991	4.6011
830	Female	61.63	RS1	151.99	96.89	33.002	27.283	95.757	28.704	121.83	60.303	51.6	57.373	59.814	50	108.86	39.643	10.93	75.224	38.024	10.654	89.882	36.997	54.543	93.566	16.92	14.948	92.722	32.251	5.5978
831	Female	62.6	RS1	149.71	114.61	36.032	27.46	104.44	36.128	122.8	72.51	54.8	60.303	69.092	55.6	112.04	50.54	13.795	73.252	46.76	15.404	93.728	47.117	61.836	94.037	25.057	20.911	93.254	42.497	9.8411
832	Female	62.48	RS1	155.07	109.8	40.545	28.741	107.5	34.826	125.73	72.51	63.6	62.256	69.58	59.6	113.06	48.463	25.068	80.505	46.933	22.558	94.764	46.822	67.462	99.103	26.579	27.909	96.917	41.277	16.784
833	Female	62.28	RS1	154.63	118.34	27.157	29.779	109.02	23.151	125.24	71.533	32.4	65.186	67.139	31.6	112.68	63.065	5.0388	79.577	61.439	4.8388	96.587	48.093	33.922	98.068	43.806	5.2104	96.83	59.08	4.7005
834	Male	62.76	RS1	152.3	97.269	43.118	27.008	85.493	48.105	125.24	62.256	71.6	65.186	55.42	73.2	113.02	30.281	31.939	76.072	27.01	34.227	98.236	35.135	82.509	95.97	6.2973	39.187	94.116	20.135	26.826
835	Female	62.6	RS1	153.07	119.5	34.302	31.92	118.49	27.187	123.29	75.439	46.8	63.232	74.463	42.8	112.04	57.533	7.1157	79.174	57.03	6.263	93.535	50.051	49.336	93.956	34.049	7.936	94.489	51.793	1.4709
836	Female	62.52	RS1	149.06	97.483	28.532	24.435	113.18	20.222	112.06	62.744	41.2	49.072	69.58	38	95.633	46.583	5.7384	65.755	49.706	6.4929	76.949	41.777	45.269	78.186	26.281	6.7381	80.083	41.653	4.025
837	Male	62.45	RS1	152.73	105.58	36.846	23.928	93.22	40.334	120.85	65.186	63.6	61.768	61.279	65.2	112.31	35.418	24.475	75.1	31.64	25.116	93.989	37.262	73.663	95.826	3.0111	33.361	94.622	21.073	17.157
838	Female	61.03	RS1	152.24	106.48	28.245	25.302	104.66	26.748	121.83	62.256	38.8	60.303	60.791	38.8	107.02	49.587	7.2287	76.128	48.944	6.9302	90.294	38.088	45.187	91.68	25.616	9.3952	91.446	43.453	4.8139
839	Female	61.01	RS1	154.1	109.18	43.085	37.37	98.86	36.908	131.1	67.139	52.4	68.603	62.744	50	120.57	50.969	13.544	86.315	46.822	11.215	101.41	42.882	55.386	106.12	27.263	16.094	104.64	43.466	7.6855
840	Female	62.16	RS1	145.25	98.266	40.962	24.032	98.154	43.608	114.5	63.232	62	55.42	64.209	64.4	102.83	38.453	26.25	64.074	38.811	27.445	84.444	39.307	70.642	82.78	17.759	28.341	82.514	32.554	17.927
841	Male	62.79	RS1	158.1	102.28	40.074	26.167	98.108	35.646	124.27	61.279	59.6	62.744	58.35	57.2	113.7	35.837	23.602	75.734	34.888	23.503	94.239	35.939	66.337	93.433	9.0351	28.764	94.027	26.234	16.335
842	Male	61.06	RS1	157.99	88.322	37.947	17.677	99.047	41.234	116.94	55.42	58.8	49.561	57.373	60.4	102.11	29.984	20.782	62.776	32.298	20.594	82.261	27.333	65.08	81.477	7.2161	23.522	81.612	24.026	13.903
843	Male	60.83	RS1	155.61	105.44	33.683	26.231	98.931	27.239	119.38	60.303	54.8	59.326	56.885	51.6	110.62	38.082	15.518	75.223	36.153	13.327	90.025	38.652	62.524	93.255	14.596	19.435	93.55	29.75	8.742
844	Female	62.12	RS1	153.56	100.41	30.343	31.56	102.72	32.185	120.85	59.814	46.8	62.256	61.768	47.6	108.92	39.289	9.1946	73.176	39.871	9.4351	91.083	36.12	53.979	90.148	17.855	11.895	90.465	33.601	2.9096
845	Male	62	RS1	156.12	110.05	25.104	22.41	105.7	22.105	123.78	59.814	40.4	57.373	57.373	38	109.82	38.612	7.2329	74.956	38.24	7.7965	92.594	34.518	45.901	93.768	10.922	7.8581	92.823	28.968	4.0302
846	Male	61.82	RS1	144.87	87.202	47.999	19.297	107.29	37.572	105.22	50.537	70.8	39.795	58.838	66.8	91.59	26.554	34	47.914	34.884	31.518	69.986	37.508	78.248	66.662	5.5828	43.962	68.449	20.553	29.485
847	Female	61.97	RS1	150.27	105.01	29.072	27.973	103.12	28.812	120.85	64.697	51.6	58.35	64.697	52.4	106	48.378	13.61	71.511	46.963	12.674	90.45	41.708	60.464	89.937	21.445	17.166	88.888	39.782	6.9865
848	Female	62.47	RS1	152.08	103.37	28.463	30.613	107.86	28.636	121.83	57.373	36.4	56.396	60.791	36.4	108.31	43.498	5.8146	70.463	44.076	5.4252	88.955	34.449	39.08	89.865	22.645	3.1899	90.634	39.218	2.2261
849	Female	62.46	RS1	150.92	101.85	52.448	26.09	109.37	47.741	114.99	72.021	73.2	54.932	76.416	70	100.28	48.623	40.432	67.902	50.626	37.738	82.902	53.838	78.882	81.88	31.869	45.047	82.955	42.738	35.032
850	Male	61.24	RS1	156.15	96.842	39.649	25.248	103.25	36.56	119.87	56.885	54.8	56.885	61.279	53.2	106.77	34.46	13.44	67.679	35.124	12.073	85.601	35.59	61.69	85.791	8.8453	22.798	86.956	26.341	9.1078
851	Female	62.58	RS1	137.99	106.83	32.818	20.321	109.3	36.263	106.69	73.486	47.6	49.561	74.463	49.2	92.29	55.935	7.7013	61.528	56.646	7.8224	77.23	50.79	51.697	78.14	33.564	10.875	77.55	49.561	3.0056
852	Male	62.18	RS1	152.31	106.8	35.549	13.148	106.1	51.251	121.34	66.65	70	50.049	67.139	78.8	104.32	41.516	32.785	61.931	42.414	37	88.818	45.5	88.194	84.632	16.373	42.735	83.609	33.485	29.595
853	Female	62.01	RS1	154.71	103.61	40.723	26.951	104.89	31.258	120.36	62.744	51.6	57.861	63.232	46.8	106.8	48.587	10.776	73.997	48.798	8.657	87.162	37.362	51.056	89.153	26.546	10.059	90.558	44.487	3.5605
854	Female	62.25	RS1	156.24	105.29	32.584	31.252	89.061	33.088	128.66	55.42	50	69.58	49.072	50.8	120	39.078	10.048	85.651	34.365	9.6957	103.14	27.527	57.135	106.29	11.339	13.987	103.73	29.449	4.5354
855	Male	62.2	RS1	155.73	91.622	37.448	19.498	85.362	35.2	121.83	51.514	64.4	55.908	48.096	62.8	112.23	25.584	27.603	69.863	22.413	26.853	89.161	28.965	72.032	92.934	3.7502	37.894	92.305	15.276	23.635
856	Female	60.86	RS1	148.17	94.696	39.62	24.765	100.92	29.802	111.57	64.209	55.6	53.955	63.232	50.8	103.77	41.164	15.41	66.856	42.904	12.45	81.437	40.853	58.591	84.697	21.61	21.467	85.487	34.77	9.9386
857	Male	61.88	RS1	160.21	112.74	26.642	29.891	108.45	22.807	125.24	62.744	37.2	65.674	61.768	34	113.83	51.686	8.5607	81.671	52.215	8.6978	95.668	35.611	38.372	98.77	28.56	7.0253	97.616	47.964	5.2524
858	Female	62.19	RS1	151.84	97.201	20.273	25.243	99.273	26.268	116.46	62.256	40.4	57.861	63.232	42.8	101.58	41.153	5.2517	66.572	43.186	6.7012	86.036	35.31	45.518	83.228	20.733	5.7203	83.675	35.453	2.0743
859	Female	60.82	RS1	149.85	105.37	41.278	24.969	123.71	29.333	109.13	65.186	52.4	48.096	73.486	47.6	98.449	49.463	11.065	61.96	54.126	8.3337	74.605	44.373	56.638	78.672	28.868	9.7125	81.619	46.492	3.1143
860	Female	62.22	RS1	157.87	107.28	38.794	29.157	102.36	32.447	124.27	65.674	56.4	63.721	62.744	54	116.23	45.185	15.296	75.933	43.084	13.405	95.173	42.278	59.37	97.049	19.803	19.867	96.768	36.24	7.1359
861	Female	60.82	RS1	150.89	114.71	30.631	28.312	116.94	27.389	119.87	72.021	41.2	56.885	72.998	39.6	104.62	55.734	5.5307	73.79	55.15	4.5777	89.131	48.33	43.113	91.538	29.875	6.8596	90.489	47.993	0.078747
862	Female	62.45	RS1	144.05	97.996	36.433	22.072	105.66	36.208	112.06	64.209	57.2	52.002	67.627	57.2	97.418	38.25	21.934	61.975	41.275	21.221	80.256	41.351	64.48	77.866	18.07	25.739	77.775	32.412	15.276
863	Female	61.59	RS1	152.7	99.11	35.29	31.194	90.402	36.593	124.27	57.861	58	63.721	53.467	58.8	112.22	35.26	15.469	76.249	32.919	15.848	95.276	33.31	63.542	94.853	7.8288	22.502	94.654	26.096	10.2
864	Male	61.12	RS1	155.1	109.18	29.27	26.318	95.709	42.843	130.13	62.744	53.2	66.162	55.908	59.6	117.67	40.022	22.717	76.226	35.067	25.044	101.2	39.56	65.196	99.357	14.061	28.515	97.067	28.46	17.371
865	Male	61.61	RS1	162.34	99.965	36.227	21.52	88.966	33.018	128.66	59.326	59.6	62.744	54.932	58.8	117.5	34.958	23.005	76.277	31.366	21.3	97.374	37.35	67.747	100.04	6.1952	29.471	97.13	24.135	16.743
866	Female	61.75	RS1	152.53	100.36	32.29	22.25	93.794	34.098	119.38	62.256	49.2	61.279	63.232	51.6	107.31	39.946	8.155	71.438	38.134	9.8912	90.853	35.542	54.904	91.481	13.625	14.463	89.872	30.148	2.717
867	Male	61.86	RS1	154.97	108.55	39.812	31.261	102.45	29.063	123.29	66.65	56.4	63.232	64.697	50	115.14	43.419	13.798	77.628	41.178	11.194	92.44	42.298	62.515	97.75	14.148	17.463	97.786	32.187	4.9648
868	Male	60.55	RS1	166.64	102.09	33.819	27.985	91.078	19.737	131.59	53.955	58	66.162	49.561	49.2	125.55	29.855	14.098	81.608	31.04	9.5487	98.197	27.63	61.383	102.77	2.938	19.798	103.69	20.912	6.5443
869	Male	62.19	RS1	156.75	89.374	31.204	26.948	93.183	31.159	123.78	52.978	51.6	60.791	54.932	52.4	110.15	30.134	9.189	72.713	31.245	10.489	92.795	30.794	59.218	91.12	3.4781	16.049	91.056	20.617	4.3898
870	Male	60.62	RS1	153.95	96.961	37.743	20.369	102.45	30.147	118.41	54.443	56.4	49.561	56.885	53.2	105.62	35.549	16.895	62.67	36.974	13.965	83.532	33.691	63.759	81.59	5.5655	22.009	83.058	27.021	9.4109
871	Female	61.71	RS1	150.53	113.66	29.421	26.717	112.8	28.19	119.87	68.115	38	57.373	67.139	37.2	107.23	52.016	4.8069	73.886	51.796	4.3352	89.806	45.273	41.867	91.899	27.774	6.1068	91.253	44	2.0096
872	Female	62.02	RS1	152.15	99.102	29.493	23.528	94.23	35.42	120.85	57.861	48.4	59.814	54.932	52.4	106.47	38.355	11.523	72.359	37.125	13.243	92.026	33.535	56.088	90.731	17.467	15.998	89.202	31.28	6.0342
873	Female	60.96	RS1	158.18	111.1	49.846	42.99	90.948	40.65	135.99	59.814	65.2	78.369	50.049	62	130.52	39.635	24.956	96.338	33.722	21.925	109.64	35.177	70.192	116.34	14.216	27.336	114.84	29.976	15.267
874	Female	61.82	RS1	149.13	108.03	27.086	31.858	110.56	19.203	118.9	66.65	32.4	60.303	66.162	30.8	112.64	51.964	7.1047	69.505	53.441	6.2146	91.238	38.11	29.603	91.968	33.653	3.6415	91.86	49.327	6.1386
875	Male	62.33	RS1	162.27	112.4	22.917	18.457	109.95	22.238	127.2	68.115	35.6	60.791	65.674	35.6	114.02	50.795	4.2949	76.333	49.939	3.6394	96.059	41.321	43.449	96.391	28.048	3.8382	96.169	45.64	0.71148
876	Male	60.5	RS1	156.91	104.45	42.263	25.817	96.978	33.654	122.8	59.326	62	61.768	55.908	58.8	114.85	31.883	25.801	73.862	30.089	23.144	93.677	34.471	68.285	94.847	3.4405	29.572	94.601	20.196	16.422
877	Female	61.44	RS1	153.91	114.42	33.275	22.021	113.8	34.099	119.38	75.928	58	56.885	78.369	59.6	105.75	61.296	15.147	69.746	59.998	14.923	88.811	56.318	64.914	89.516	34.365	18.791	88.827	52.334	7.2654
878	Female	61.4	RS1	152.12	106.37	38.045	26.686	104.04	35.365	117.92	64.209	54	60.303	63.232	52.4	107	44.62	8.3582	71.871	45.269	7.555	89.387	42.279	58.082	87.816	20.561	12.418	89.081	37.728	1.2691
879	Female	60.74	RS1	154.79	100.93	54.465	33.225	100.18	32.552	117.92	70.068	74.8	58.35	70.557	62	110.94	44.388	33.216	79.671	44.755	26.85	85.767	41.772	76.648	94.958	19.233	33.939	97.065	37.776	24.086
880	Male	61.34	RS1	154.63	102.74	25.386	18.809	105.12	29.986	120.85	56.885	41.2	52.002	57.861	44.4	102.44	32.655	4.5886	63.193	33.341	4.7374	85.923	25.977	50.592	82.655	4.7681	6.5029	82.336	24.887	-2.0976
881	Male	61.51	RS1	153.11	90.959	30.261	19.893	96.533	31.028	117.92	52.49	52.4	53.955	54.443	52.4	108.85	24.675	14.303	62.871	26.211	14.186	86.483	27.403	61.88	86.975	1.7534	20.094	85.185	16.245	6.9389
882	Female	60.71	RS1	153.31	114.18	29.363	28.979	106.08	31.429	124.76	70.068	35.6	63.232	65.674	39.6	111.58	56.757	6.8924	75.705	55.037	7.904	96.009	46.466	40.31	95.8	36.105	4.3104	94.766	50.858	5.6169
883	Female	60.71	RS1	151.32	100.07	43.403	22.527	106.89	38.896	115.48	63.721	66.8	51.514	67.139	65.2	96.848	40.042	30.045	66.989	40.151	28.158	81.612	41.017	73.315	82.928	15.467	37.87	81.861	32.178	24.43
884	Female	61.96	RS1	150.04	116.93	29.646	24.942	114.62	31.562	117.92	82.764	47.6	58.35	81.299	47.6	104.13	60.385	6.1257	70.305	60.555	5.4267	88.343	55.894	49.215	88.372	37.201	7.5163	86.698	53.931	-0.84642
885	Male	61.76	RS1	151.08	97.95	36.096	27.048	91.557	37.469	119.87	60.791	58.8	63.721	57.373	59.6	110.78	33.625	20.481	76.576	31.471	19.265	92.64	36.626	68.695	94.557	10.348	27.911	94.069	23.622	15.118
886	Male	61.32	RS1	155.71	103.56	32.531	29.956	91.495	35.673	129.15	64.209	63.6	65.674	58.838	66.8	115.54	31.258	20.037	81.307	27.55	21.82	99.953	35.926	75.648	101.32	2.9012	30.431	99.81	19.558	14.978
887	Male	61.15	RS1	159.24	95.364	39.52	28.87	91.909	34.881	126.71	60.303	68.4	62.744	60.303	66	115.01	31.934	29.308	77.371	30.882	27.393	94.523	38.368	79.064	95.09	7.2147	40.752	95.976	21.965	25.509
888	Female	60.54	RS1	151.26	107.33	31.529	25.54	104	27.992	114.99	74.463	45.2	63.232	72.998	43.6	112.27	58.669	3.015	69.895	59.12	0.94777	90.902	43.963	44.445	91.054	37.428	4.6857	91.754	53.657	-2.2955
889	Male	60.93	RS1	155.04	107.38	31.759	22.749	108.39	33.843	123.78	58.838	46.8	53.467	61.279	49.2	110.44	41.78	7.0638	70.716	39.79	6.5054	88.878	31.461	54.377	92.723	11.473	9.1036	91.706	32.776	1.0655
890	Female	60.89	RS1	150.63	105.65	27.77	30.781	102.1	33.298	119.87	65.186	49.2	63.721	65.186	51.6	107.77	48.511	16.952	74.044	46.722	18.754	91.278	45.344	54.759	92.567	26.431	19.232	91.035	41.033	10.577
891	Female	60.9	RS1	149.51	107.29	28.245	29.388	104.08	33.044	121.83	75.928	56.4	62.744	74.951	59.6	105.93	52.698	15.881	76.425	52.904	16.953	93.067	51.241	63.383	90.368	31.423	22.819	90.149	45.774	11.887
892	Male	61.34	RS1	154.72	95.068	33.729	25.106	103.8	26.591	119.87	56.396	50.8	55.42	59.326	46.8	107.9	36.157	10.369	67.907	37.049	9.6987	86.232	31.455	53.633	85.845	11.33	10.419	87.864	29.344	3.3216
893	Male	61.97	RS1	154.36	106.6	43.897	28.46	98.48	50.458	126.71	68.603	71.6	58.838	66.162	75.6	112.01	38.367	37.584	70.522	36.574	40.667	93.945	44.231	84.031	93.034	10.872	46.666	91.309	25.441	33.374
894	Female	60.92	RS1	155	105.47	33.301	28.062	100.69	26.664	122.31	60.303	49.2	62.256	58.838	45.2	109.49	43.157	6.8161	79.674	42.821	6.4998	92.409	36.941	52.191	93.095	19.362	7.9997	94.155	37.021	0.7973
895	Female	61.53	RS1	142.49	110.23	37.062	21.155	117.02	37.338	111.08	71.533	52.4	51.025	74.951	54	96.329	57.847	10.508	63.216	58.804	11.443	80.284	51.251	56.704	80.335	32.782	12.348	80.055	51.357	3.4999
896	Male	60.76	RS1	150.17	99.672	33.443	20.639	105.14	32.05	116.94	57.373	55.6	53.467	57.861	55.6	104.23	32.405	17.129	61.458	32.96	17.174	83.975	30.755	64.613	82.99	3.733	20.394	82.4	22.572	7.3373
897	Female	61.88	RS1	153.91	107.68	45.61	28.341	112.41	33.23	117.43	74.463	63.6	56.885	74.951	57.2	110.21	51.319	22.142	73.496	51.726	18.761	88.092	48.549	63.095	91.994	28.147	22.543	92.038	44.645	11.576
898	Female	61.67	RS1	145.03	107.97	30.578	18.998	100.32	38.062	116.46	63.721	46.8	52.978	60.303	51.6	99.409	48.156	4.6763	63.406	45.837	5.5617	85.789	33.737	51.962	82.064	24.336	6.2063	81.093	41.347	-1.2924
899	Female	61.71	RS1	153.61	112.32	27.354	22.595	104.94	34.309	120.85	66.162	45.2	61.279	63.232	47.6	108.78	44.396	6.6083	70.857	41.708	5.8418	92.932	38.421	48.684	92.734	17.835	6.0958	89.643	35.896	0.071083
900	Female	60.47	RS1	154.27	108.61	31.953	30.409	99.76	30.732	127.2	62.256	45.2	64.697	58.35	45.2	116.23	39.292	8.3947	79.462	35.508	8.9669	96.942	37.245	50.167	99.152	17.28	10.993	98.376	32.389	2.0136
901	Male	60.31	RS1	159.23	101.49	34.543	20.198	104.37	24.791	118.9	56.396	54	52.002	58.838	47.6	107.84	35.845	11.777	69.209	36.963	9.4462	84.517	31.922	59.91	89.202	8.8602	13.741	89.383	28.207	5.541
902	Female	61.01	RS1	156.32	106.76	25.543	29.092	103.66	28.603	124.76	61.768	41.2	62.744	60.303	42.8	111.58	40.928	4.1575	77.472	40.799	5.3561	94.417	36.772	47.532	96.338	20.662	5.7811	96.316	34.074	1.3411
903	Female	61.85	RS1	151.2	110.3	27.806	26.108	114.75	26.51	116.94	70.068	42.8	56.396	70.557	41.2	105.1	54.227	4.2252	68.263	54.698	3.233	84.773	48.252	44.056	85.345	34.883	3.5298	86.255	48.269	-0.46487
904	Female	61.47	RS1	153.82	112.1	39.038	25.223	108.9	40.476	119.87	70.557	52.4	58.35	70.557	53.2	106.63	58.525	12.486	71.504	56.518	12.664	88.856	49.522	55.834	89.607	33.329	13.92	89.775	50.43	4.5368
905	Female	61.47	RS1	142.53	98.334	32.789	25.83	97.309	31.522	109.13	62.744	50	55.42	62.744	49.2	100.58	41.382	9.6763	67.029	40.603	9.8156	83.109	38.857	55.572	84.707	15.821	13.536	84.243	31.815	3.542
906	Male	60.56	RS1	155.15	89.846	30.843	14.516	93.561	40.132	116.46	54.932	59.6	52.978	52.002	64.4	102.78	26.287	24.659	61.65	26.201	27.392	86.355	28.199	71.88	83.437	2.9032	32.6	80.905	17.589	18.969
907	Male	61.87	RS1	158.27	106.08	28.753	22.951	108.31	23.442	120.85	59.326	44.4	54.932	60.791	40.4	105.93	38.996	5.9431	70.768	39.484	4.6621	87.677	29.811	47.623	87.342	9.5298	7.5034	89.583	31.166	1.344
908	Male	60.24	RS1	155.93	108.34	25.174	22.776	101.29	27.014	124.76	60.303	38.8	59.814	54.932	40.4	110.9	38.31	5.0678	74.852	35.437	4.5384	94.374	30.455	44.22	95.429	14.96	4.2386	93.411	30.071	0.28864
909	Female	62.1	RS1	149.76	105.97	34.638	30.728	102.63	36.57	121.83	67.139	53.2	64.209	64.697	54	111.15	44.91	15.234	75.348	43.648	15.514	94.608	42.694	61.355	93.681	18.396	19.152	92.24	37.542	8.0327
910	Female	59.96	RS1	153.99	116.45	38.806	34.716	94.595	34.777	131.59	74.951	58	71.045	64.209	56.4	120.5	52.33	18.041	87.597	46.563	17.329	103.61	46.677	63.089	106.67	29.183	21.628	104.44	43.151	11.296
911	Male	61.01	RS1	160.23	99.175	43.015	27.172	90.491	38.467	127.2	58.838	70	61.279	54.443	68.4	114.85	34.796	30.178	75.737	31.139	27.817	95.77	36.43	77.777	96.861	6.0721	39.731	95.484	21.61	23.634
912	Male	60.52	RS1	152.07	113.14	29.381	19.865	103.08	26.903	121.83	68.115	54	59.326	64.697	54.8	109.37	44.326	15.917	73.861	41.354	16.242	91.669	43.874	62.244	93.279	20.013	23.588	92.356	35.767	11.518
913	Male	61.28	RS1	166.16	104.36	39.563	27.927	95.84	38.817	134.03	67.627	70	69.092	64.209	70	121.31	39.24	34.397	82.309	37.477	35.142	102.65	44.656	81.537	105.61	11.615	44.559	103.45	26.495	29.718
914	Male	61.48	RS1	152.46	97.927	31.668	18.865	90.455	31.052	116.46	57.373	52.4	52.49	53.467	54	105.1	32.327	11.884	65.177	29.023	11.489	86.757	23.9	60.156	87.485	3.9732	16.676	86.369	22.09	6.0071
915	Male	60.69	RS1	154.94	102.94	25.887	22.421	98.427	32.136	121.83	54.932	45.2	59.326	52.49	50	108.22	35.62	5.8001	70.673	32.9	7.2203	91.655	29.875	52.458	92.947	8.2401	9.7593	91.113	25.351	0.69382
916	Male	60.64	RS1	151.82	104.21	32.775	22.092	91.798	30.313	124.76	56.885	48.4	58.838	51.025	47.6	115.82	36.683	11.367	74.028	32.096	10.439	93.668	32.712	55.392	98.451	10.386	16.901	96.079	26.753	5.3596
917	Female	61.57	RS1	152.34	97.544	38.002	28.945	95.07	37.488	119.38	59.326	60.4	63.721	57.373	59.6	108.1	35.63	26.076	73.859	34.918	26.002	91.832	39.873	67.597	90.674	12.416	29.615	90.391	27.89	17.849
918	Male	60.68	RS1	156.57	108.03	19.74	21.139	101.8	24.831	126.22	56.396	30.8	57.861	53.467	34	109.11	42.79	5.749	72.081	41.902	5.5648	92.545	27.244	41.78	91.27	11.065	7.1605	90.983	35.336	3.019
919	Male	61.76	RS1	153.89	102.72	29.51	18.685	98.186	34.688	117.92	66.65	58.8	54.932	65.674	62	104.33	42.47	23.293	65.582	41.051	24.341	86.891	42.787	68.666	86.645	19.991	32.475	85.022	34.016	20.148
920	Male	61.78	RS1	158.05	109.96	28.94	26.922	93.238	27.15	131.59	62.256	46	66.65	53.955	45.2	121.66	42.404	10.031	80.115	37.369	8.599	101.76	41.016	52.71	104.79	13.623	11.251	102.7	32.407	2.2229
921	Male	60.12	RS1	157.79	105.4	23.031	19.913	100.84	24.851	123.78	58.35	36.4	57.373	56.396	37.2	106.54	43.953	4.6353	69.213	42.742	4.9754	91.817	33.735	42.244	88.516	20.014	4.0151	87.658	36.193	1.8783
922	Female	59.89	RS1	154.83	95.973	32.799	25.618	91.996	36.645	127.2	56.885	58	61.768	56.396	60.4	112.62	33.491	22.815	72.073	34.522	24.78	95.174	34.831	69.211	94.195	8.0083	31.379	92.769	24.314	18.098
923	Male	60.61	RS1	154.88	108.1	29.255	23.623	108.75	23.967	119.38	64.697	46.8	57.373	63.232	44.4	107.97	44.593	6.4791	70.647	44.235	5.6113	88.182	40.491	51.944	88.831	19.31	8.7134	88.819	35.466	0.19918
924	Female	60.47	RS1	148.77	102.76	28.582	21.596	105.77	32.992	114.99	63.232	42.8	55.908	65.674	45.2	100.07	50.801	4.3355	67.307	51.567	5.0234	84.85	44.61	48.601	84.738	28.883	6.5834	83.72	43.894	-1.3221
925	Female	61.49	RS1	149.89	108.94	36.156	25.984	96.126	30.362	124.76	54.443	50.8	57.373	49.072	49.2	113.96	43.394	14.278	76.176	39.381	13.231	92.665	37.831	55.902	97.115	19.544	18.916	96.074	36.448	9.2786
926	Female	61.69	RS1	159.17	119.16	48.436	31.915	113.46	39.578	127.2	74.951	53.2	66.65	72.51	50	117.33	58.696	14.029	81.936	55.37	13.079	97.219	47.108	54.053	100.7	35.22	12.774	99.951	52.554	5.7293
927	Female	60.45	RS1	151.85	108.04	33.152	23.422	111.93	33.109	116.46	69.58	52.4	55.42	72.021	52.4	101.77	50.973	15.528	66.364	52.163	15.671	85.844	49.839	56.562	83.737	32.564	20.921	83.082	45.479	10.787
928	Female	61.74	RS1	148.27	105.26	32.629	33.682	99.59	32.863	120.85	63.232	43.6	64.209	60.303	43.6	110.18	47.048	4.893	75.598	45.211	4.3492	93.321	39.858	46.466	93.723	24.39	4.6863	93.62	40.182	-1.61
929	Male	61.47	RS1	153.05	112.23	42.392	20.606	105.57	40.914	119.87	73.486	66.8	56.396	70.068	66.8	110.08	45.385	28.99	69.764	41.934	28.236	89.365	48.066	77.346	92.146	18.753	33.973	91.478	34.825	21.007
930	Male	60.91	RS1	156.5	113.68	29.102	20.145	109.12	30.745	121.83	68.115	46	56.885	65.186	46.8	108.64	47.446	6.2539	69.748	45.354	6.5424	91.31	38.408	51.733	89.044	21.005	7.3033	89.377	39.491	0.91665
931	Female	61.5	RS1	151.48	102.95	38.9	24.57	107.68	42.885	116.46	67.139	63.6	55.42	71.533	65.2	102.96	41.189	29.624	64.985	45.051	31.806	84.884	45.74	72.837	82.573	18.592	36.792	83.348	33.043	24.715
932	Female	60.74	RS1	151.24	109.88	39.182	27.835	102.09	40.436	123.78	68.603	57.2	60.303	64.697	59.6	109.41	44.568	14.256	76.542	42.373	14.711	94.48	39.791	63.492	93.847	21.734	15.842	92.088	38.717	6.5864
933	Female	60.55	RS1	152.49	111.7	31.069	24.802	109.73	34.773	121.83	68.115	49.2	57.373	68.115	52.4	106.74	48.015	12.101	73.618	46.621	13.052	90.693	44.662	58.529	91.18	22.886	14.786	91.136	40.64	4.552
934	Female	61.55	RS1	147.47	113.46	31.125	24.126	111.17	24.743	117.92	68.115	36.4	53.467	67.627	34	104.11	62.403	6.7292	69.276	61.715	5.8751	86.042	46.876	37.864	88.026	43.595	5.4911	86.586	59.778	3.5087
935	Male	61.84	RS1	160.63	110.99	30.082	26.728	103.16	27.544	128.17	67.627	46.8	63.721	62.744	46	118.17	43.851	6.3721	79.498	41.581	7.4297	98.025	39.4	50.172	99.253	15.043	9.0547	99.935	33.938	0.65164
936	Male	60.45	RS1	153.03	104.73	33.654	25.026	110.14	33.928	118.41	58.838	51.6	58.838	59.814	52.4	108.78	36.602	11.814	69.778	36.97	11.796	88.826	34.764	59.684	89.961	12.135	17.66	88.721	28.38	6.1026
937	Female	59.95	RS1	150.06	101.85	37.073	30.702	110.13	30.19	117.43	63.721	54.8	57.861	66.65	50.8	104.7	45.271	18.975	70.081	46.756	16.615	86.338	46.817	57.826	86.144	27.621	22.313	86.792	40.575	12.492
938	Female	60.31	RS1	154.62	112.55	34.182	31.437	106.21	33.645	125.24	75.439	51.6	63.232	72.998	53.2	113.78	49.016	19.368	77.759	47.057	19.413	95.53	48.593	61.787	95.44	26.421	24.376	95.95	39.21	12.835
939	Female	60.37	RS1	151.65	96.315	33.358	30.045	100.03	30.946	118.41	53.467	50.8	57.861	56.885	48.4	106.9	39.453	11.666	71.339	39.603	9.7949	87.662	36.801	53.387	89.919	17.856	15.299	89.051	33.3	5.233
940	Male	60.79	RS1	152.55	105.22	49.336	21.08	91.412	54.206	122.8	70.068	79.6	59.326	63.232	82	112.99	37.049	50.535	73.921	32.063	51.307	93.397	46.356	94.922	97.206	9.654	61.351	94.542	24.29	46.389
941	Female	61.11	RS1	157.46	108.32	39.421	32.917	106.78	32.449	126.22	68.603	50	63.232	70.068	48.4	115.48	46.833	11.09	79.408	45.81	8.864	95.234	45.319	53.94	97.981	25.442	14.249	98.671	40.54	4.3972
942	Female	60.34	RS1	149.05	123.62	21.454	24.748	109.98	34.418	121.34	80.322	38	65.186	73.975	44.4	105.72	63.161	3.6957	75.564	59.234	4.757	96.562	57.264	46.204	93.184	39.315	5.1718	91.039	54.488	0.31793
943	Female	61.41	RS1	156.19	124.48	18.071	29.711	106.64	27.432	130.62	75.439	30.8	69.58	68.115	36.4	116.93	62.696	3.034	75.998	58.668	4.0807	102.1	49.011	35.913	100.82	41.907	1.601	97.125	57.538	1.5066
944	Male	61.1	RS1	159.82	110.75	21.827	25.509	106.78	21.484	126.22	63.232	29.2	56.885	60.791	26	114.67	49.001	3.7542	72.921	48.259	4.1274	92.719	30.994	30.811	94.227	23.618	4.1921	93.33	45.149	3.191
945	Female	60.77	RS1	151.02	114.47	29.028	24.94	109.64	34.031	117.43	73.486	45.2	60.303	72.998	50	104.88	55.02	9.2459	65.773	53.314	12.492	89.332	52.235	50.289	87.474	31.928	15.077	85.896	47.654	5.8839
946	Female	61.36	RS1	150.8	108.3	35.554	22.916	102	51.611	120.85	62.744	56.4	57.861	61.279	64.4	103	44.084	18.244	65.253	42.058	22.32	89.444	41.421	66.002	85.821	20.72	22.701	84.154	35.672	13.261
947	Male	60.81	RS1	162.18	100.49	26.672	29.352	91.64	30.969	128.66	52.978	47.6	65.674	50.049	50	116.38	38.674	10.742	75.854	36.598	11.86	98.145	33.799	55.14	96.434	14.526	15.057	95.935	30.854	5.1482
948	Male	61.63	RS1	165.15	104.59	38.975	25.462	96.294	29.328	128.66	62.256	59.6	63.232	58.35	54.8	119.64	35.853	22.533	82.229	33.042	18.926	98.136	36.857	68.305	103.28	9.5753	30.645	103.29	24.204	18.406
949	Female	60.38	RS1	151.08	113.6	28.62	26.348	107.74	25.451	122.31	68.115	33.2	60.303	63.721	31.6	112.91	60.942	2.3551	71.395	58.508	2.2031	91.984	46.257	35.761	92.577	43.016	-2.0718	93.645	58.631	-0.39325
950	Female	60.76	RS1	155.71	105.94	32.695	37.36	100.68	26.255	129.64	66.162	46.8	69.092	62.256	42.8	118.37	54.466	6.5239	88.102	51.608	5.2476	101.27	42.309	52.438	108.67	28.417	8.3432	105.35	47.858	0.0014656
951	Male	60.51	RS1	155.91	108.59	22.715	18.605	103.77	26.088	122.8	61.768	33.2	56.885	58.35	36.4	109.11	47.647	3.6253	71.578	47.33	3.2174	92.109	32.572	40.03	93.134	22.489	1.2672	90.674	43.32	1.5024
952	Male	61.05	RS1	163.87	102.14	29.39	19.712	97.43	34.369	128.66	55.42	49.2	60.303	52.49	53.2	114.74	38.494	10.385	75.681	37.051	13.047	96.932	29.87	62.444	96.639	9.9063	18.565	96.157	29.253	6.9891
953	Female	61.42	RS1	151.37	112.03	43.134	28.65	109.25	41.251	121.83	71.533	65.2	61.279	70.068	64.4	109.78	50.727	29.189	74.385	50.434	28.578	91.101	52.034	74.804	91.673	28.254	34.518	91.764	40.982	23.144
954	Female	61.38	RS1	155.76	108.24	31.378	29.157	93.647	37.668	131.1	68.115	57.2	66.65	61.768	60.4	116.95	46.281	25.641	81.383	42.867	26.025	100.36	45.947	66.993	100.9	21.359	28.473	99.276	37.722	19.85
955	Female	60.42	RS1	153.3	108.28	38.795	20.27	99.662	37.939	118.41	64.209	54.8	56.396	61.279	54.8	107.67	42.066	18.58	70.035	39.264	16.941	88.23	39.667	59.962	90.507	18.258	22.279	90.024	33.3	11.089
956	Female	60.43	RS1	146.4	95.508	22.994	23.325	101.36	27.35	113.53	53.467	38	52.002	57.373	39.6	98.658	44.438	4.1905	62.427	46.54	4.264	81.865	34.27	41.477	80.393	26.107	3.8774	80.342	41.39	0.61666
957	Female	61.3	RS1	153.94	129.93	31.66	24.176	118.7	38.091	126.71	81.787	46.8	63.232	74.951	50.8	113.32	62.639	7.0047	76.682	58.908	8.4794	97.705	55.212	50.896	97.743	37.469	10.089	95.672	53.923	2.0197
958	Male	60.37	RS1	156.97	92.983	46.859	28.319	95.164	36.478	123.29	61.768	74	56.396	62.256	69.2	111.41	32.229	37.73	74.672	32.186	34.017	90.222	35.95	84.196	93.95	11.267	41.472	93.804	24.408	30.109
959	Female	60.21	RS1	136.5	92.699	32.793	14.993	116.92	31.559	97.412	54.932	48.4	36.377	68.115	48.4	80.272	39.471	8.6681	43.252	47.322	7.9026	63.458	39.16	50.806	55.756	20.036	11.051	60.049	36.349	1.9398
960	Female	59.81	RS1	148.05	110.22	26.374	24.793	109.8	28.366	116.46	64.697	39.6	56.885	65.186	41.2	103.17	50.436	5.3855	69.035	49.725	5.7573	86.615	43.836	43.255	86.289	30.448	6.9704	86.041	45.63	0.53149
961	Female	60.59	RS1	149.42	102.83	36.423	22.866	110.8	32.032	110.6	67.139	55.6	52.978	70.557	52.4	97.472	45.766	14.924	62.842	48.657	13.413	79.112	45.497	59.715	77.43	23.855	19.764	79.301	40.11	8.9646
962	Female	61.34	RS1	155.22	101.93	42.253	22.268	99.171	40.608	120.85	65.674	62.8	57.861	63.232	62.8	110.08	37.232	27.121	71.449	36.724	27.092	90.099	38.068	69.939	91.112	15.641	32.283	91.067	29.19	20.53
963	Female	61.56	RS1	144.37	117.88	25.091	29.027	110.93	35.987	117.92	78.857	41.2	61.768	73.975	47.6	102.55	57.806	7.5483	72.29	56.073	10.23	93.372	50.888	53.815	90.214	34.548	11.038	86.657	50.35	2.8755
964	Female	60.77	RS1	152.5	101.64	35.356	31.52	98.832	35.865	121.34	65.674	61.2	63.232	66.162	61.2	114.98	43.581	22.573	76.083	40.589	21.399	94.037	45.229	71.09	98.705	19.099	29.267	97.185	34.469	16.057
965	Female	61.36	RS1	142.47	110.19	26.99	17.936	115.93	33.376	111.08	72.021	42.8	48.096	74.463	45.2	93.047	53.914	9.4048	59.277	55.727	10.969	79.163	50.064	48.08	74.989	32.808	12.279	74.678	47.178	3.6254
966	Female	61.25	RS1	149.22	100.86	37.493	24.803	98.461	35.858	120.85	57.861	53.2	58.35	55.42	52.4	107.28	38.685	12.153	74.524	37.985	11.274	90.185	36.088	58.361	91.497	15.054	17.932	91.313	31.486	6.5753
967	Female	61.73	RS1	157.04	98.056	38.485	27.852	99.867	39.832	125.73	58.838	58.8	61.768	61.279	61.2	109.38	36.68	23.297	74.233	37.57	24.782	92.54	35.867	64.28	91.373	17.581	27.98	91.017	31.589	18.187
968	Female	61.32	RS1	148.16	105.17	34.176	24.994	107.4	37.558	117.92	61.279	53.2	55.42	62.256	54.8	101.92	43.72	14.888	68.151	44.392	15.426	86.817	39.321	56.941	84.749	23.597	17.182	84.732	39.887	8.6066
969	Female	59.82	RS1	154.67	101.96	39.154	24.576	100.96	34.593	124.76	58.838	56.4	53.955	58.838	53.2	109.6	37.799	14.037	73.876	37.919	12.52	90.463	33.212	60.312	91.289	15.921	19.28	92.01	31.026	9.5094
970	Male	61.2	RS1	154.22	102.92	29.614	16.646	98.838	38.225	120.85	58.35	51.6	53.955	57.373	55.6	101.75	40.049	12.746	66.137	38.498	14.886	88.137	34.744	62.523	84.565	14.678	17.63	83.286	31.528	7.369
971	Female	61.18	RS1	157.84	102.58	36.615	27.633	88.679	35.143	129.64	62.256	56.4	62.744	56.885	56.4	121.26	38.285	14.964	81.51	32.672	14.997	99.257	34.478	61.302	104.91	11.61	17.464	102.75	28.903	7.1233
972	Female	60.66	RS1	159.7	113.6	26.104	36.479	102.36	29.564	135.01	73.975	50	71.533	69.092	51.6	120.4	50.864	10.828	87.881	48.663	11.517	105.47	44.395	53.738	106.09	26.891	15.094	104.32	44.282	4.7483
973	Male	61.28	RS1	151.13	108.65	26.926	21.083	109.03	23.833	116.46	66.162	44.4	53.467	64.697	43.6	105.44	47.908	6.8774	65.646	48.979	5.8064	86.27	37.674	48.025	86.03	19.803	8.7528	85.089	40.162	3.3995
974	Female	60.47	RS1	151.97	117.06	24.529	20.992	118.26	21.179	119.38	73.975	28.4	52.002	73.975	28.4	104.55	66.206	1.9374	67.331	65.38	1.4584	84.944	50.068	28.552	86.541	46.174	-3.2287	86.259	64.723	0.80404
975	Male	61.54	RS1	157.84	113.65	32.75	15.879	119.58	28.391	118.41	72.021	49.2	50.537	75.439	46.8	100.47	51.098	6.0487	63.311	53.757	6.4497	82.423	43.454	51.987	78.647	27.693	7.561	81.227	46.059	0.59254
976	Female	60.81	RS1	153.33	103.26	31.522	24.327	102.84	32.656	118.41	64.697	45.2	58.838	64.697	46	102.75	49.085	4.3725	70.091	50.234	5.0144	88.667	42.05	49.073	86.599	25.09	5.809	86.011	43.991	-0.91971
977	Female	61.26	RS1	152.79	118.38	25.062	30.203	101.48	35.67	127.69	70.068	47.6	68.603	63.232	51.6	113.96	48.768	5.7642	80.63	43.81	7.4546	100.95	41.914	54.671	102.43	23.72	8.4128	98.954	39.905	1.4976
978	Male	60.78	RS1	157.89	111.78	31.674	22.008	112.23	28.702	125.24	62.256	46	54.932	61.279	43.6	108.21	48.004	4.4757	70.562	48.365	3.9222	89.788	38.439	49.649	88.519	18.187	7.7801	88.832	41.189	-1.0102
979	Male	60.39	RS1	156.88	93.128	28.867	17.711	91.46	32.001	124.27	49.072	60.4	56.396	47.607	62	108.23	25.093	29.147	67.09	23.852	30.217	90.496	27.073	72.673	88.868	4.0443	38.051	87.782	18.584	25.728
980	Male	59.62	RS1	162.82	101.01	32.095	18.72	87.876	25.959	127.2	57.861	53.2	59.814	52.002	50	116.98	35.462	12.729	72.308	31.817	10.956	94.929	34.303	59.385	95.154	8.7911	15.488	95.652	25.309	5.5702
981	Male	61.45	RS1	158.73	114.08	26.72	24.067	103.19	31.556	128.66	70.557	45.2	66.65	61.768	48.4	115.77	57.441	7.8638	75.067	49.867	9.1228	99.861	46.013	53.057	96.786	24.984	10.146	94.96	45.607	3.3609
982	Male	60.5	RS1	154.57	110.23	27.579	22.925	108.33	26.553	117.43	70.068	43.6	57.861	68.603	45.2	105.07	49.043	4.9931	68.706	47.33	5.1057	88.87	43.366	48.565	86.8	18.446	8.1113	87.268	40.202	0.45029
983	Female	61.72	RS1	151.13	103.89	33.582	25.701	101.38	29.67	119.38	61.279	50	59.326	60.791	47.6	108.82	42.47	8.9419	74.43	40.879	7.3423	90.061	36.287	53.061	93.599	17.125	11.995	92.601	33.774	2.5135
984	Male	61.33	RS1	153.5	103.97	32.027	24.31	93.39	42.719	124.76	62.744	58.8	61.279	58.838	66	110.32	41.05	21.655	69.745	36.734	25.854	94.162	39.513	73.107	94.097	12.053	30.955	90.953	30.574	18.803
985	Female	60.78	RS1	151.04	89.877	38.755	27.164	92.482	32.808	115.97	54.932	59.6	57.373	56.396	56.4	105.48	34.44	15.997	70.118	35.733	14.809	86.703	35.987	64.952	85.777	15.222	22.634	87.355	29.605	9.0343
986	Male	60.24	RS1	152.3	102.94	31.781	29.734	96.479	35.588	122.8	56.396	50.8	60.791	55.42	52.4	112.45	33.986	14.44	70.719	34.005	15.081	91.915	32.31	57.054	90.443	8.4619	18.694	91.157	25.015	7.9624
987	Female	61.14	RS1	152.43	110.28	35.511	30.949	104.04	35.864	125.73	66.65	50	61.768	62.256	50.8	111.31	48.222	8.2875	75.646	46.666	8.8007	94.837	39.57	53.17	94.698	25.881	10.19	93.266	42.909	2.8843
988	Female	60.82	RS1	158.24	107.64	40.609	30.36	94.165	30.866	128.17	61.768	55.6	67.139	54.443	51.6	116.6	45.159	8.1083	85.197	42.376	6.4359	100.58	34.458	53.172	103.25	22.15	10.742	102.39	38.956	1.6202
989	Male	61.6	RS1	158.05	108.74	22.626	26.902	96.137	30.588	129.64	61.768	38	65.674	55.908	44.4	116.07	43.932	5.6957	77.886	41.275	6.59	100.9	29.573	43.63	100.21	19.941	8.0798	95.971	37.722	3.2013
990	Female	60.06	RS1	143.09	95.078	38.555	20.482	103.07	38.534	108.64	51.514	58.8	46.143	56.885	58.8	93.338	34.736	22.706	56.727	37.624	23.478	75.706	37.463	64.476	73.615	16.051	27.735	74.737	29.541	17.272
991	Female	60.2	RS1	144.91	110	30.613	18.982	104.78	38.569	114.01	72.021	46.8	53.955	69.58	50	98.815	50.739	8.3807	64.617	49.183	9.5843	85.723	42.178	51.042	82.774	24.791	10.233	81.209	41.415	1.5466
992	Female	61.42	RS1	147.45	103.26	33.175	24.207	106.43	39.506	116.46	63.721	50.8	55.42	66.162	54	99.622	41.93	16.156	64.828	43.327	16.805	84.18	39.965	58.574	81.353	17.338	18.58	81.402	35.065	8.7282
993	Male	61.08	RS1	157.34	105.78	31.554	20.643	92.279	35.674	127.69	59.326	54.8	60.303	53.955	56.4	111.88	35.012	15.1	76.554	30.892	16.006	95.595	31.433	65.843	96.19	3.5954	20.644	95.202	22.73	6.8426
994	Female	60.25	RS1	149.67	107.9	29.299	20.138	110.33	27.199	114.5	61.768	47.6	51.025	64.209	46.8	98.612	41.762	8.9684	66.304	43.491	8.9362	80.569	38.616	51.931	79.906	19.276	12.705	81.956	34.788	3.9555
995	Male	61.39	RS1	155.35	100.64	36.926	22.378	99.462	42.605	122.8	59.326	61.2	57.373	56.885	66	108.45	36.577	22.795	66.415	36.141	24.704	91.089	41.741	77.191	88.872	8.738	33.483	86.038	26.075	16.848
996	Male	60.39	RS1	157.26	107.13	33.449	18.754	98.803	32.012	124.27	68.115	54.8	56.885	63.721	54	108.42	39.865	12.826	67.511	39.311	13.021	90.882	38.557	62.481	85.161	10.986	17.237	85.737	30.425	5.8416
997	Female	60.87	RS1	150.23	107.86	35.826	32.369	102.46	30.507	124.76	70.068	51.6	63.232	66.65	50	113.59	51.322	13.063	81.347	47.216	12.036	95.734	44.656	57.095	103.05	25.074	14.917	99.37	43.674	6.5268
998	Female	60.86	RS1	153.05	101.02	39.214	30.981	102.25	30.744	120.36	59.326	50	62.256	59.814	48.4	110.52	43.764	9.9196	75.382	42.805	8.3619	92.074	40.711	51.94	93.185	21.753	10.581	93.337	37.24	2.2412
999	Male	60.47	RS1	150.72	101.23	34.192	20.005	99.529	31.84	115.97	55.908	55.6	51.025	56.396	54	105.07	33.532	17.59	62.658	33.906	16.431	82.916	36.846	64.151	83.699	7.7332	26.427	82.957	23.544	11.926
1000	Female	60.07	RS1	156.84	112.12	44.431	34.472	98.349	44.102	130.13	70.068	62.8	71.533	64.697	62	120.93	47.894	26.9	85.819	44.317	27.019	102.57	43.271	68.836	105.65	24.385	31.327	104.47	38.164	21.246
1001	Male	59.57	RS1	156.7	114.29	27.928	24.468	106.33	25.34	126.22	72.998	44.4	60.791	67.627	43.6	112.81	56.657	6.5177	74.991	55.225	6.3394	94.849	45.354	48.589	94.509	28.641	7.9833	94.27	49.231	0.95554
1002	Male	59.68	RS1	155.74	95.268	24.951	25.768	98.234	22.019	122.31	48.096	36.4	56.885	48.584	34	107.29	32.659	7.5183	71.496	33.965	5.6161	88.399	20.352	41.339	86.639	6.5952	6.7754	88.378	27.603	2.0491
1003	Male	61.03	RS1	165.81	96.213	39.437	23.484	91.556	35.129	128.17	57.861	67.6	60.791	53.955	64.4	119.96	32.198	31.697	76.189	29.265	26.999	95.192	33.337	79.187	101.39	7.4446	36.787	99.566	22.729	25.774
1004	Male	60.16	RS1	155.53	100.51	32.386	23.854	78.773	44.582	132.57	54.932	58.8	68.115	44.189	64.4	120.47	27.292	19.927	82.997	20.934	22.179	106.72	23.023	75.176	107.59	2.718	29.417	102.41	16.429	14.869
1005	Male	59.98	RS1	156.85	99.769	45.051	32.085	92.791	36.795	124.76	60.303	64.4	65.674	56.396	60.4	115.9	38.352	22.477	82.146	36.291	18.964	95.177	34.98	73.009	99.619	7.9309	26.543	99.981	26.519	12.808
1006	Female	61.57	RS1	149.84	107.01	31.837	27.095	105.54	31.522	119.38	66.162	45.2	55.42	65.674	45.2	101.65	53.124	5.6635	73.377	51.933	5.8437	87.018	42.517	47.343	87.284	33.199	6.802	87.235	48.418	0.8324
1007	Female	61.15	RS1	150.54	95.703	36.038	20.739	106.56	40.048	115.48	52.002	56.4	50.537	58.35	58	96.49	34.129	23.691	60.441	37.71	25.868	82.172	36.566	63.169	77.099	18.508	31.329	77.277	30.003	20.088
1008	Female	60.85	RS1	151.44	123.38	28.218	25.13	102.88	39.727	127.69	79.346	46.8	64.697	68.115	53.2	111.15	56.319	9.605	79.683	50.633	11.334	100.06	52.654	53.717	99.685	34.143	14.124	95.21	47.487	4.5313
1009	Female	60.99	RS1	152.53	104.02	25.596	24.805	101.81	33.94	121.34	59.814	44.4	60.791	61.279	49.2	106.17	43.832	9.3333	69.778	41.866	10.866	91.436	38.41	52.405	89.612	20.516	14.786	87.895	36.396	4.4311
1010	Female	60.4	RS1	147.35	127.22	24.601	27.29	111.3	28.821	120.36	82.764	31.6	63.721	74.951	35.6	107.62	69.853	3.5676	74.629	65.668	4.1906	94.675	54.953	34.883	92.42	49.337	2.2612	91.293	64.465	2.4215
1011	Female	61.22	RS1	147.66	108.64	51.07	30.273	110.56	52.018	115.97	80.322	75.6	60.303	81.299	78	103.44	49.735	43.485	69.761	50.264	44.348	88.287	57.545	88.875	85.522	26.336	51.856	85.251	41.716	38.325
1012	Female	60.48	RS1	152.58	94.618	45.754	29.892	97.594	35.135	121.34	61.279	63.6	59.326	62.744	58.8	106.25	36.555	25.008	74.631	37.724	23.078	88.007	32.976	67.816	88.598	15.751	30.826	90.629	31.951	19.831
1013	Male	60.03	RS1	148.71	102.5	34.105	19.253	108.04	38.749	114.99	63.232	57.2	52.49	66.65	59.6	99.566	43.2	17.322	63.495	43.738	17.684	83.98	41.222	66.797	83.363	16.243	22.097	81.268	33.376	9.8882
1014	Female	61.28	RS1	154.1	107.49	29.392	28.658	100.97	31.04	124.76	64.697	54	64.697	60.791	55.6	111.76	45.056	13.025	77.496	43.092	12.812	95.489	41.947	58.738	95.895	21.183	16.515	94.798	38.169	6.7773
1015	Female	60.28	RS1	150.39	105.29	34.621	24.012	102.77	27.513	119.87	61.279	52.4	54.932	60.303	49.2	108.05	42.252	10.743	73.653	41.631	8.2623	88.769	38.904	54.242	90.216	21.741	14.264	91.417	34.823	4.3493
1016	Male	60.15	RS1	154.87	116.04	26.725	27.927	103.3	32.924	126.22	69.092	42.8	63.721	63.232	44.4	114.9	49.78	6.0618	75.586	46.482	5.788	96.334	44.581	51.032	99.167	21.159	8.7487	96.902	40.217	-0.17127
1017	Male	60	RS1	156.95	97.872	36.27	28.153	94.286	35.391	124.76	54.443	58.8	62.256	52.002	58.8	111.79	36.832	18.041	74.835	36.491	17.766	93.25	35.277	68.65	91.781	10.717	27.319	92.872	28.566	13.287
1018	Male	59.88	RS1	156.53	108.42	30.92	21.286	113.2	30.659	118.41	67.139	46.8	53.955	69.58	46	104.8	49.608	8.4124	65.426	50.771	8.5977	84.965	45.302	50.659	83.119	23.46	9.8788	85.118	42.612	2.3035
1019	Female	60.63	RS1	153	103.97	33.981	28.103	99.695	39.942	125.73	64.697	56.4	59.814	62.256	59.6	110.77	38.864	16.369	74.176	35.581	16.742	94.352	37.754	64.81	96.305	12.291	23.931	93.797	28.726	11.835
1020	Female	60.13	RS1	154.21	103.33	41.884	23.013	87.753	45.74	125.73	60.303	71.6	62.256	52.49	74.8	110.98	33.12	36.599	78.505	28.858	36.464	96.041	36.251	82.204	97.464	9.8713	44.636	95.718	23.002	32.341
1021	Male	61.07	RS1	152.2	105.85	26.273	21.39	105.18	30.754	119.38	62.256	46.8	54.932	62.744	49.2	102.13	43.149	5.3157	64.99	44.033	5.3093	87.058	35.689	54.66	83.409	14.546	8.8932	82.928	34.78	0.60566
1022	Male	61.07	RS1	154.81	103.54	34.42	19.897	95.231	43.221	125.73	64.209	58.8	64.209	59.326	64.4	110.01	42.384	21.916	70.243	39.532	27.989	95.783	43.282	73.569	92.392	16.854	30.981	90.4	32.032	19.676
1023	Male	59.5	RS1	156.22	104.28	31.239	23.155	107.78	29.666	124.27	59.326	50	54.932	60.791	50	107.55	45.582	14.565	68.749	47.035	11.905	88.26	40.435	59.599	87.811	20.679	20.073	88.147	35.905	9.4284
1024	Female	60.75	RS1	153.76	104.2	30.509	28.813	96.304	25.448	124.76	65.186	54.8	62.256	60.303	50.8	113.17	46.888	18.368	77.938	39.48	16.794	94.411	41.46	59.77	98.047	21.035	25.179	96.277	35.781	14.335
1025	Male	61.08	RS1	156.52	104.72	26.214	21.088	100.99	27.85	125.24	61.768	48.4	55.908	60.303	50	112.28	41.872	9.4911	68.355	39.591	11.273	93.037	35.509	57.112	93.286	14.321	15.354	91.207	31.764	4.386
1026	Female	60.89	RS1	146.7	119.33	29.492	24.68	114.93	36.676	117.92	77.393	42	56.396	75.928	46.8	100.38	64.398	6.6058	69.863	62.566	7.2893	88.238	55.136	45.054	86.4	45.919	7.6901	84.664	59.959	1.7876
1027	Female	60.53	RS1	155.03	116.32	35.46	21.961	112.27	36.21	122.31	68.603	54	57.373	66.162	54.8	108.46	48.204	11.338	74.599	46.797	11.602	91.749	45.138	60.039	92.956	23.024	16.48	91.826	39.654	4.1577
1028	Male	59.91	RS1	164.64	111.81	25.042	28.841	95.916	26.571	135.01	58.35	39.6	72.021	50.537	41.2	121.06	39.994	5.3455	88.429	34.951	5.0574	105.73	31.488	46.353	106.44	11.439	6.2607	105.19	28.871	3.4938
1029	Male	60.94	RS1	157.31	106.44	34.252	28.04	101.77	30.571	125.73	62.256	46.8	63.721	58.838	45.2	117.94	42.653	6.6071	80.449	38.776	5.8224	97.146	38.408	54.944	104.28	13.499	9.1711	101.42	32.319	-0.76159
1030	Female	61.32	RS1	150.47	107.94	30.948	35.711	93.61	38.697	129.15	67.139	47.6	70.557	60.791	52.4	117.23	48.86	13.65	85.059	44.383	16.468	104.52	40.34	56.293	105.59	24.626	21.794	102.22	39.633	9.7926
1031	Male	60.45	RS1	154.87	105.41	21.753	27.034	111.56	22.908	119.38	60.791	28.4	60.791	63.232	29.2	104.72	52.604	1.9333	72.094	53.944	0.50427	88.5	38.163	29.424	87.979	31.533	-0.80022	89.097	51.19	0.16384
1032	Male	61.22	RS1	155.98	105.47	39.416	25.263	96.427	42.126	125.73	62.256	70.8	61.279	58.35	71.6	110.8	35.93	35.144	69.541	35.808	35.621	93.942	41.038	84.184	90.057	8.0805	40.272	89.192	26.453	28.671
1033	Female	59.99	RS1	153.24	110.08	34.514	27.943	102.02	39.612	124.27	62.256	41.2	61.768	59.326	44.4	106.66	52.261	6.6764	73.54	50.723	7.0775	93.857	44.019	46.432	90.772	28.399	8.9014	89.784	45.329	4.0746
1034	Male	60.99	RS1	159.09	98.949	30.47	22.489	95.012	35.256	126.71	54.443	52.4	61.279	53.467	56.4	111.35	30.584	12.9	70.718	29.861	14.498	95.235	29.368	64.202	91.784	2.1271	21.643	90.813	19.715	8.1136
1035	Male	61.18	RS1	156.99	105.63	34.874	20.63	98.265	36.201	122.31	60.303	56.4	59.814	56.396	58.8	111.53	41.464	14.31	74.187	38.217	13.859	92.763	35.729	66.904	96.66	10.922	19.662	94.603	29.41	6.1166
1036	Female	60.88	RS1	151.23	102.99	33.662	26.916	96.124	36.937	122.8	58.35	47.6	62.256	54.443	49.2	109.52	41.329	9.6598	73.817	37.869	10.007	94.015	34.968	52.118	93.852	17.149	11.43	91.424	33.132	3.1402
1037	Male	60.56	RS1	155.43	107.68	39.302	21.85	104.92	35.496	120.36	62.744	53.2	57.861	60.791	52.4	110.35	44.373	11.539	69.736	43.881	11.538	89.333	36.468	59.395	90.103	16.251	14.592	90.445	35.2	5.7036
1038	Female	61.33	RS1	154.96	109.15	32.962	31.025	108.75	32.741	124.76	68.115	51.6	64.209	67.139	51.6	109.24	47.029	8.7056	77.732	46.99	9.2849	94.423	38.927	54.225	94.045	20.53	10.385	93.424	39.994	2.3919
1039	Male	59.99	RS1	155.14	88.839	32.997	24.478	91.385	41.883	123.29	48.096	62.8	60.303	50.049	66	106.19	24.213	24.057	71.329	24.647	26.417	92.26	26.583	75.865	90.574	2.7631	34.18	89.449	14.461	19.109
1040	Male	59.59	RS1	156.31	103.32	29.182	28.99	103.64	26.661	126.22	64.209	45.2	61.279	63.232	44.4	112.98	42.438	6.5514	72.791	41.092	5.9733	94.681	37.531	50.812	92.612	15.04	9.352	92.446	33.227	-0.11174
1041	Female	59.56	RS1	157.47	114.3	30.465	27.369	105.95	27.998	128.17	68.115	43.6	64.209	62.744	43.6	114.96	52.668	5.0935	80.906	49.551	5.1463	97.736	41.139	44.667	99.755	27.873	4.9347	98.821	46.528	-0.8373
1042	Male	60.82	RS1	155.48	104.88	36.978	21.676	103.08	38.816	121.34	59.814	53.2	55.908	59.326	53.2	108.61	44.725	10.437	67.871	45.165	10.287	88.391	35.667	61.152	88.289	17.132	12.406	88.012	36.049	3.2255
1043	Female	61.19	RS1	148.21	100.98	49.007	28.006	99.663	55.903	123.29	62.744	81.2	59.814	62.256	84.4	108.42	36.82	48.668	69.235	35.127	52.182	91.568	43.837	90.806	91.843	14.253	59.902	89.471	26.655	46.598
1044	Male	60.64	RS1	158.95	97.744	29.095	26.719	94.824	20.723	122.31	53.955	44.4	60.303	53.467	40.4	113.73	35.094	8.1968	74.329	33.477	5.9566	91.357	30.784	50.602	95.822	8.6073	7.8421	94.965	26.459	1.7981
1045	Male	60.6	RS1	149.35	96.588	20.76	18.618	92.368	30.997	117.92	47.119	39.6	55.908	46.631	46	104.32	28.683	4.304	65.277	26.449	6.2167	87.704	27.545	50.346	88.345	2.4694	7.4482	86.643	19.151	1.228
1046	Female	61.05	RS1	148.58	103.96	35.553	24.618	104.42	38.209	117.92	63.232	58.8	53.467	64.209	61.2	100.56	42.234	21.935	67.426	42.776	21.165	85.361	40.501	66.414	84.31	20.364	25.771	82.928	36.359	15.164
1047	Male	59.85	RS1	157.56	94.807	42.536	25.291	94.849	37.605	121.34	56.396	66.8	57.373	55.908	66	106.81	29.419	30.281	71.28	30.216	30.271	88.884	32.316	78.992	89.492	5.0675	40.637	88.665	21.033	26.181
1048	Female	60.41	RS1	149.49	98.523	38.269	21.014	99.331	42.155	116.94	65.674	63.6	55.42	64.697	65.2	103	41.508	24.86	67.296	41.782	24.427	87.163	44.442	72.836	84.421	17.951	30.29	84.285	32.92	17.151
1049	Male	60.18	RS1	151.56	106.77	28.657	18.912	98.991	38.058	118.9	60.303	50.8	54.932	58.35	57.2	104.6	37.866	8.1857	65.198	35.917	9.6892	89.319	34.079	57.615	87.426	11.815	12.817	84.936	28.251	3.0872
1050	Male	59.87	RS1	151.56	105.74	32.486	22.456	102.39	35.214	119.87	61.279	56.4	55.908	59.326	58.8	106.73	37.572	19.727	65.559	37.073	20.458	88.311	37.459	66.758	86.87	12.65	24.676	85.587	29.386	14.912
1051	Female	59.48	RS1	153.61	109.35	35.235	34.126	99.141	34.05	124.76	63.721	49.2	68.115	59.814	50	118.42	41.627	14.811	80.999	38.965	13.018	98.073	40.491	54.665	99.576	19.185	16.012	99.412	33.914	5.9124
1052	Female	59.79	RS1	150.11	116.93	35.518	27.967	112.65	32.785	118.41	72.51	49.2	60.303	70.557	47.6	104.57	54.755	12.56	73.172	53.807	11.164	89.98	51.252	53.238	88.377	33.145	13.842	88.923	49.234	4.6628
1053	Female	59.94	RS1	153.17	108.05	30.581	25.87	104.61	32.223	120.36	63.721	47.6	58.838	62.744	48.4	107.96	47.672	7.12	70.071	44.381	6.5828	89.537	40.768	55.084	89.451	18.783	9.8647	88.763	39.293	-0.29116
1054	Male	59.85	RS1	156.63	103.34	33.172	24.051	103.7	30.829	120.85	58.35	50.8	58.35	57.861	47.6	110.72	40.886	8.777	70.871	39.74	7.1388	88.752	35.924	56.323	93.959	13.316	12.804	92.27	31.178	2.2782
1055	Male	60.28	RS1	156.06	105.16	41.143	20.263	105.5	39.887	120.36	62.744	66	50.537	62.744	65.2	106.64	33.343	32.014	68.092	33.35	30.232	85.239	38.591	76.517	88.067	8.2315	42.569	87.934	22.351	27.259
1056	Female	61.21	RS1	159.04	115.42	25.725	28.077	96.957	34.445	132.57	67.627	43.6	68.603	59.326	49.2	114.29	48.738	4.7348	80.909	44.161	5.7219	103.99	38.971	51.573	100.34	21.688	5.8078	96.984	39.564	-0.3608
1057	Male	59.97	RS1	156.58	102.85	27.354	21.58	90.53	35.54	123.78	60.303	52.4	62.256	55.908	54.8	110.77	35.596	13.257	71.816	32.204	15.115	94.465	32.729	63.63	94.35	6.0855	16.451	92.003	25.159	7.7978
1058	Female	59.91	RS1	143.98	98.727	36.789	23.24	100.11	34.345	114.01	63.232	54.8	54.443	63.721	54.8	96.414	39.482	14.239	67.639	41.244	13.05	83.513	39.028	59.499	79.16	17.218	19.541	80.106	33.028	7.2638
1059	Male	61.22	RS1	156.41	110.47	36.131	20.43	106.87	32.694	123.29	64.209	48.4	53.955	61.279	48.4	111.15	44.69	8.1856	67.939	42.233	8.1614	89.946	36.574	55.164	90.235	14.385	11.025	89.924	34.873	3.5321
1060	Female	61.18	RS1	146.52	112.1	31.631	25.789	114.11	38.051	114.01	72.51	47.6	57.373	72.998	50.8	101.27	55.338	10.644	66.501	55.465	13.235	86.019	53.585	52.899	84.202	35.966	14.894	83.019	48.868	5.2261
1061	Female	59.93	RS1	145.7	96.939	26.432	26.299	100.89	32.27	114.5	57.861	36.4	52.978	60.791	41.2	100.36	47.731	4.4627	65.19	48.62	3.9629	83.452	34.894	41.018	81.527	27.82	4.8665	82.689	42.151	2.4921
1062	Female	59.35	RS1	153.82	111.11	30.911	26.462	100.73	28.763	125.73	65.674	45.2	61.279	61.279	44.4	111.81	50.707	6.0631	77.679	47.132	5.5017	94.413	42.199	52.449	99.377	25.511	7.6844	96.585	42.592	-0.44318
1063	Male	60.22	RS1	159.62	104.85	39.908	19.416	106.82	35.125	120.36	63.721	68.4	53.467	65.674	66	107.56	36.006	36.306	70.268	36.343	36.866	87.327	42.544	77.839	90.733	11.443	47.092	89.633	24.991	32.024
1064	Female	61.23	RS1	154.74	98.658	41.826	24.581	101.24	35.85	121.83	54.443	60.4	54.443	56.885	58	106.17	38.122	19.918	73.358	38.696	18.864	88.321	38.541	67.258	90.043	16.004	26.666	90.417	31.403	14.532
1065	Male	59.88	RS1	155.46	95.631	29.949	19.311	97.55	36.453	119.38	55.908	62	57.373	56.885	64.4	107.25	33.416	19.365	67.391	32.829	20.591	89.048	31.36	73.768	89.357	6.3033	26.278	88.311	22.992	12.249
1066	Female	59.77	RS1	151.26	106.29	31.848	25.265	108.09	35.669	118.41	68.115	51.6	56.396	71.045	54	104.38	49.984	12.439	66.992	48.926	11.783	86.202	43.13	57.904	87.634	23.996	12.056	86.145	40.964	2.8815
1067	Male	59.7	RS1	160.12	96.391	33.299	21.584	91.03	35.64	127.2	48.584	57.2	58.35	46.631	57.2	114.92	28.438	16.76	70.301	27.016	15.938	93.888	26.88	68.163	93.476	2.1285	24.832	93.147	18.676	9.2862
1068	Female	60.11	RS1	153.03	112.08	27.932	25.876	107.73	24.335	124.27	68.115	41.2	58.35	66.162	41.2	109.75	48.842	7.1467	76.615	47.486	6.4311	92.004	44.646	45.56	93.853	27.988	8.4763	93.492	42.398	1.3619
1069	Female	61.09	RS1	152.75	116.35	31.785	22.857	120.88	29.099	116.94	75.439	42	53.955	77.393	41.2	101.6	63.859	4.058	68.819	65.896	3.4092	84.551	54.451	46.883	83.256	42.922	5.1567	84.42	59.068	-1.589
1070	Male	61.13	RS1	154.75	99.488	32.331	18.483	100.78	41.046	120.36	60.303	56.4	54.443	61.279	62.8	101.78	35.793	17.062	64.616	35.501	20.212	88.502	35.828	67.884	82.799	8.5026	26.032	82.185	25.866	13.488
1071	Female	59.84	RS1	148.62	118.88	31.334	24.021	121.72	31.192	111.57	80.322	43.6	56.885	81.787	43.6	99.168	69.178	5.7581	65.636	70.025	5.6865	83.851	57.629	46.912	81.07	45.298	8.0697	82.159	63.536	3.1918
1072	Female	61.08	RS1	148.66	116.79	30.655	32.595	103.51	39.972	124.76	73.486	47.6	67.627	66.65	52.4	111.96	53.838	10.552	78.305	49.603	12.429	98.991	49.188	54.708	98.421	25.771	14.979	94.95	43.357	4.5952
1073	Female	60.46	RS1	149.16	111.06	35.22	30.254	118.49	28.651	118.41	69.092	43.6	54.443	72.021	40.4	105.71	58.585	4.4687	69.576	61.086	4.7287	85.804	47.267	44.485	87.559	38.113	5.9738	88.591	54.235	3.2779
1074	Male	60.22	RS1	158.42	104.03	33.599	24.848	96.426	37.219	125.73	59.326	54	59.814	56.396	54.8	116.24	35.992	12.915	71.63	33.785	12.635	93.204	36.413	62.891	94.02	6.6734	20.813	94.223	26.364	7.0837
1075	Female	60.88	RS1	155.97	110.87	36.62	30.295	105.42	31.111	124.27	68.603	50	64.209	66.65	47.6	114.33	52.429	10.566	76.161	51.578	8.5072	93.761	50.366	53.333	93.846	31.811	13.957	94.39	46.167	3.9495
1076	Male	61.25	RS1	157.76	105.5	29.144	24.617	112.09	24.728	121.83	60.303	39.6	53.955	64.697	35.6	107.86	47.58	4.9111	69.172	52.828	5.3052	86.629	36.532	43.643	86.866	24.356	6.0795	89.859	44.628	2.7211
1077	Male	60.84	RS1	149.42	91.007	40.73	18.711	98.296	38.628	113.04	52.49	66.8	49.561	55.42	66	97.826	28.295	29.198	63.247	28.036	29.956	81.3	33.191	78.234	80.225	3.3466	39.689	79.922	16.268	25.406
1078	Male	60.46	RS1	158.46	95.314	25.955	19.169	94.789	31.691	122.31	56.885	44.4	62.256	55.42	48.4	108.61	36.133	6.8315	71.353	36.144	7.7178	93.414	32.535	53.371	90.855	10.5	10.738	88.492	26.983	2.0904
1079	Female	61.15	RS1	154.95	113.82	31.355	36.05	96.845	26.982	132.08	68.603	41.2	72.021	60.303	38.8	121.08	49.545	5.4249	92.211	45.62	6.5062	104.5	43.957	42.606	109.21	26.662	6.7959	107.25	40.987	3.2043
1080	Male	59.17	RS1	156.15	107.48	28.804	19.43	108.06	26.22	120.36	66.65	51.6	52.978	67.627	50.8	105.69	45.065	10.068	67.39	45.339	8.5754	85.242	40.334	55.581	85.155	20.148	11.334	85.793	36.719	2.1454
1081	Female	61.04	RS1	154.39	105.08	37.886	32.187	101.31	32.464	124.27	63.721	50	62.256	62.744	48.4	112.42	43.163	9.4882	78.778	42.556	7.7245	92.24	37.515	51.426	96.189	22.498	9.9427	96.197	37.424	2.4741
1082	Female	59.35	RS1	154.27	102.61	29.753	23.546	100.59	26.436	119.87	61.279	39.6	58.35	60.791	39.6	108.37	49.58	4.7022	71.937	47.385	4.764	89.585	35.985	42.797	90.913	25.166	6.1053	91.618	41.418	2.891
1083	Male	60.48	RS1	158.47	102.17	30.606	30.495	93.475	36.14	129.64	61.279	51.6	68.115	56.396	54	121.18	38.869	17.486	78.935	34.588	17.882	101.59	36.52	64.162	104.72	10.323	24.169	101.66	28.158	10.517
1084	Female	59.95	RS1	154.58	106.92	27.288	29.501	106.81	24.595	122.8	70.068	41.2	63.232	69.092	40.4	109.62	52.956	3.5306	76.494	53.187	3.4676	92.999	41.828	43.302	93.628	30.543	4.3075	93.572	46.946	-0.30121
1085	Female	59.24	RS1	153.16	114.89	20.339	30.42	101.23	20.388	128.66	63.232	22.8	66.65	56.396	22.8	114.42	55.517	3.5778	82.728	52.482	2.6787	100.88	37.889	25.472	100.71	35.389	0.38736	98.414	51.829	1.4654
1086	Female	61.07	RS1	149.91	92.698	34.848	27.423	93.183	42.915	119.87	56.885	59.6	59.814	57.373	63.6	106.27	31.564	30.339	69.575	31.742	32.649	89.95	37.606	72.47	87.836	6.9606	37.715	86.905	21.668	25.392
1087	Female	61.08	RS1	149.16	111.51	27.195	24.229	123.95	23.472	113.53	74.951	34.8	52.002	76.904	31.6	102.32	64.55	2.5741	63.487	65.776	3.1105	80.963	49.052	35.326	81.209	43.814	0.91898	83.819	62.062	0.83201
1088	Male	60.8	RS1	158.84	96.865	34.651	16.557	99.697	41.895	120.85	59.326	63.6	56.885	60.303	66.8	105.6	31.326	26.332	65.566	32.124	28.351	88.882	34.773	77.608	87.099	3.1645	35.217	84.376	19.669	21.193
1089	Male	60.96	RS1	155.68	98.818	30.647	26.63	90.528	31.356	124.27	49.561	47.6	63.232	45.654	47.6	112.3	35.923	7.086	75.545	32.791	5.5257	95.089	25.36	52.504	96.051	9.4503	6.4137	94.188	27.501	1.9903
1090	Male	61	RS1	157.23	104.13	43.467	28.714	102.23	42.008	126.71	61.279	68.4	60.791	61.279	65.2	115.82	37.986	30.275	74.28	37.391	28.988	94.16	41.06	75.336	96.301	13.054	36.593	96.277	27.54	23.124
1091	Female	59.72	RS1	152.42	107.67	32.489	32.729	97.22	35.985	123.78	65.186	56.4	65.186	59.814	56.4	114.96	44.994	18.925	78.221	41.478	18.221	95.912	42.65	63.296	97.822	21.621	25.665	97.38	37.033	14.037
1092	Female	59.75	RS1	158.3	109.06	43.97	32.591	103.26	45.814	128.66	73.975	67.6	67.139	71.045	69.2	115.39	48.527	32.642	79.729	46.306	33.08	97.747	50.195	78.499	96.52	20.662	39.077	97.274	37.441	25.258
1093	Male	59.14	RS1	157.27	101.97	34.324	24.682	95.305	35.954	127.2	59.814	56.4	60.303	54.443	58	115.71	28.743	21.117	76.323	24.196	21.778	96.415	27.588	66.699	97.78	2.8487	27.626	96.903	15.958	14.241
1094	Male	59.94	RS1	158.61	99.422	37.508	20.191	98.073	37.901	124.27	57.861	58.8	57.373	55.908	58	110.72	30.524	14.503	69.355	29.716	14.852	91.798	29.492	64.665	90.125	2.6573	20.484	89.528	21.833	7.3817
1095	Female	59.86	RS1	150.73	112.18	29.853	28.291	105.56	39.297	120.85	65.186	42	62.744	63.232	47.6	106.31	51.17	4.4836	72.32	48.775	5.4083	92.539	40.609	47.497	90.001	29.03	4.9726	89.542	42.715	2.2375
1096	Male	59.72	RS1	152.65	99.011	32.146	21.759	93.374	40.191	123.29	55.908	54.8	58.35	53.955	58.8	109.3	33.8	17.666	70.719	31.931	19.7	91.711	32.442	64.758	91.655	6.3083	24.508	90.206	21.636	12.856
1097	Female	60.73	RS1	148.46	92.265	27.663	23.752	101.12	30.976	112.55	56.396	44.4	55.908	60.303	47.6	95.868	40.275	6.632	64.445	42.047	7.8679	82.072	36.848	52.78	79.1	17.002	11.993	80.567	33.432	2.6844
1098	Female	59.25	RS1	157.06	103.32	34.936	28.317	99.028	28.959	124.76	65.186	51.6	64.209	63.232	48.4	113.49	42.273	14.96	83.31	39.716	13.168	95.819	33.669	56.341	99.833	16.829	19.519	99.414	33.764	9.7452
1099	Male	59.33	RS1	149.66	106.98	32.853	18.523	110.43	28.738	113.53	65.674	49.2	48.096	66.65	47.6	101.18	44.965	12.816	61.956	45.467	11.403	78.885	44.678	54.572	81.223	21.588	16.325	80.919	37.254	6.7167
1100	Male	59.93	RS1	158.82	103.89	29.414	19.158	102.71	33.138	122.31	59.326	43.6	57.861	60.791	48.4	109.08	40.763	11.576	69.733	40.344	12.599	88.786	34.491	55.048	89.112	15.612	14.838	89.027	33.252	5.5268
1101	Female	59.57	RS1	148.91	94.687	36.385	29.899	106.39	30.009	115.48	55.908	54	51.514	62.256	51.6	102.28	36.212	14.356	65.918	38.98	13.708	81.78	33.168	57.665	82.071	16.422	17.609	83.19	31.748	7.1966
1102	Male	60.91	RS1	166.2	93.242	39.291	19.868	89.925	42.524	128.66	47.119	66	58.35	44.678	70	116.67	23.246	26.926	71.62	20.574	29.417	96.498	27.573	78.937	95.23	2.9437	41.658	94.43	13.235	24.83
1103	Female	60.89	RS1	150.15	106.68	44.859	21.251	111.1	43.336	114.5	67.139	66.8	52.49	68.603	65.2	99.548	46.233	29.346	64.181	48.347	27.273	82.532	45.707	74.789	80.82	20.787	32.914	80.231	38.35	21.039
1104	Female	59.81	RS1	148.49	103.12	33.45	30.063	95.777	38.166	121.83	61.768	48.4	61.279	58.838	51.6	106.65	41.285	11.506	73.18	38.014	11.478	92.494	33.203	53.82	93.113	16.567	16.933	90.272	32.582	7.552
1105	Female	59.25	RS1	152.96	98.019	36.948	30.504	100.95	31.833	119.38	59.814	54.8	60.303	61.279	52.4	108.47	40.547	16.147	73.73	38.929	15.237	90.209	36.354	57.954	93.105	16.77	19.71	91.835	32.485	8.7488
1106	Female	59.48	RS1	153.73	99.148	44.05	32.237	92.831	32.061	123.78	60.791	63.6	65.674	57.373	58.8	114.64	37.1	26.983	81.871	35.268	22.382	94.967	38.332	71.379	98.176	13.763	34.245	98.505	28.489	21.711
1107	Male	60.6	RS1	148.56	108.21	34.862	22.107	103.11	37.471	117.92	70.068	58	58.35	66.65	59.6	108.57	45.327	15.867	67.63	38.386	15.266	89.271	38.556	65.401	90.703	10.448	20.87	87.99	30.64	8.4043
1108	Female	59.06	RS1	151.22	114.16	24.576	26.228	109.96	28.232	119.87	70.557	39.6	58.35	67.139	41.2	108.59	56.314	6.5408	72.705	54.374	6.8993	90.747	42.581	42.868	91.98	36.146	7.0746	91.45	51.078	3.9501
1109	Female	60.15	RS1	156.48	106.52	41.593	29.728	109.01	34.631	123.78	71.045	64.4	61.279	72.021	62	110.7	46.85	32.759	75.497	47.885	30.111	91.124	51.727	70.314	91.754	27.978	37.498	92.579	39.748	26.123
1110	Male	60.29	RS1	145.63	92.186	30.893	19.253	112.56	24.187	105.22	54.932	45.2	43.213	64.697	40.4	91.476	36.829	6.0261	52.741	43.054	6.2333	69.916	36.027	45.549	67.262	16.391	7.2089	70.925	32.457	1.6389
1111	Male	59.8	RS1	153.22	99.768	29.663	25.579	95.22	24.609	121.83	58.35	51.6	59.814	56.396	50	113.63	35.015	13.483	70.812	32.343	12.439	91.666	34.934	59.736	94.608	5.7996	21.757	93.591	25.313	8.2327
1112	Female	60.16	RS1	156.66	102.27	27.127	34.381	93.833	21.172	129.64	58.838	41.2	68.115	54.443	38	116.96	40.721	4.5167	85.815	37.557	4.1463	101.08	32.927	45.552	103.05	16.761	7.0349	101.99	32.713	0.15912
1113	Male	60.79	RS1	156.13	111.29	41.101	24.37	103.33	35.96	125.24	64.209	54.8	59.814	59.326	50.8	112.12	43.805	15.14	76.054	40.607	12.854	93.12	39.778	62.645	94.889	18.81	18.586	93.57	35.606	9.0112
1114	Male	59.59	RS1	149.89	113.82	20.101	21.498	115.06	22.253	118.41	67.627	27.6	55.908	68.115	27.6	102.97	58.625	4.9826	70.49	59.58	4.5481	88.176	41.739	30.662	89.038	33.891	3.6847	87.278	54.791	4.8123
1115	Female	59.62	RS1	144.31	101.39	37.036	20.221	106.25	40.33	113.53	64.209	56.4	48.584	66.162	58	96.088	43.869	16.007	60.802	46.074	16.057	79.825	39.944	58.403	77.65	21.917	18.275	78.023	38.726	8.5047
1116	Female	59.26	RS1	149.53	101.27	37.695	23.034	106.08	39.927	114.01	56.885	54.8	53.955	57.373	55.6	98.516	37.997	15.001	65.192	39.002	15.405	84.199	38.345	63.342	81.83	11.446	21.769	80.798	29.848	8.4523
1117	Male	59	RS1	157.52	91.34	26.042	23.358	91.75	30.924	124.27	45.654	45.2	60.791	44.678	47.6	111.46	29.871	8.5879	69.49	29.137	10.71	93.461	21.952	54.891	90.322	2.8336	10.692	90.534	21.79	1.3435
1118	Male	58.97	RS1	148.83	94.394	36.71	21.164	99.85	34.293	113.53	56.885	56.4	52.49	59.326	55.6	102.23	34.487	21.662	60.29	35.598	20.183	81.854	35.236	65.194	80.754	8.9218	26.54	80.583	24.837	15.507
1119	Male	59.6	RS1	154.58	90.601	44.314	23.353	95.504	41.781	116.94	59.814	75.6	57.373	62.744	75.6	104.17	29.398	37.924	69.125	31.502	37.464	85.88	40.836	89.964	84.377	4.6371	49.242	85.299	19.039	33.821
1120	Male	60.48	RS1	153.68	105.59	26.235	18.901	104.91	35.282	120.36	59.814	46	56.396	57.373	50	103.57	38.076	5.8807	68.229	36.183	7.2582	89.815	29.997	54.112	87.657	9.0587	12.595	85.478	29.394	1.4768
1121	Male	59.52	RS1	150.97	113.14	28.966	16.458	101	37.348	118.9	65.674	47.6	55.42	58.35	53.2	107.96	44.519	8.3091	68.124	41.917	9.7342	91.507	35.94	61.041	88.656	14.384	12.367	87.704	34.077	1.7556
1122	Male	60.78	RS1	160.64	97.775	29.633	24.159	93.979	36.92	128.66	55.908	54	64.697	54.932	58	112.4	34.23	13.408	75.719	33.731	14.174	97.029	32.798	62.683	92.068	9.5067	18.698	93.523	26.511	8.6759
1123	Male	60.79	RS1	152.06	94.52	28.23	21.167	98.504	32.211	120.85	51.025	49.2	51.514	53.467	51.6	104.42	34.512	8.7089	64.51	35.696	10.814	86.312	29.374	57.091	84.305	11.148	10.733	84.018	28.973	2.0055
1124	Male	59.06	RS1	155.68	113.43	30.051	21.405	112.08	30.85	122.8	67.139	46	57.373	65.674	45.2	112.27	46.612	8.7707	69.875	46.082	8.0393	89.413	40.927	52.19	90.668	17.146	12.283	91.269	36.67	2.5082
1125	Female	60.72	RS1	157.18	116.35	17.851	27.067	102.76	23.962	130.13	69.092	34.8	67.139	62.744	38	118.31	54.187	2.3483	76.46	50.675	3.0153	101.5	38.127	38.845	99.562	28.925	0.96657	98.406	47.45	-0.89766
1126	Female	59.67	RS1	154.27	123.92	16.369	29.593	110.22	17.629	128.17	72.021	19.6	64.697	65.186	21.2	114.97	66.073	-3.9634	77.323	61.702	-2.0142	98.76	44.31	20.753	98.505	37.547	-6.8657	96.592	58.461	-3.8762
1127	Female	60.56	RS1	148.54	118.59	40.338	32.653	114.06	41.322	119.38	80.322	59.6	62.744	79.346	59.6	108.94	60.823	21.858	75.142	59.287	21.806	91.522	54.448	64.482	91.786	35.409	24.141	92.526	52.199	13.965
1128	Female	60.15	RS1	151.57	98.594	34.664	34.482	94.526	40.48	125.24	66.162	54	66.162	64.697	57.2	109.07	41.353	15.381	75.361	40.949	17.819	95.763	39.806	59.56	92.688	19.586	22.618	91.458	34.192	11.541
1129	Male	59.13	RS1	156.86	100.52	39.68	20.432	97.762	33.215	123.29	56.885	56.4	54.932	55.908	52.4	109.94	34.614	17.398	70.884	33.298	15.716	87.796	32.159	60.645	91.294	9.2289	21.163	90.949	25.61	9.4599
1130	Female	58.88	RS1	149.94	100.92	35.325	24.335	109.71	32.212	111.57	58.838	49.2	51.514	62.744	47.6	98.274	42.864	6.5559	66.866	44.137	5.9865	79.64	38.802	50.621	81.447	21.731	10.286	82.772	37.54	1.4323
1131	Male	60.66	RS1	153.95	98.175	36.256	23.124	92.543	41.44	121.34	58.35	60.4	59.814	54.443	65.2	107.6	32.315	21.649	70.241	30.029	23.95	92.723	33.074	74.007	91.945	4.2681	31.825	89.286	21.795	18.168
1132	Male	60.45	RS1	156.86	100.27	26.868	16.445	104.34	37.079	122.8	57.861	54.8	55.42	58.35	60.4	101.99	36.214	13.241	67.748	36.952	16.475	89.68	36.215	67.216	85.183	11.023	23.454	83.959	28.048	10.287
1133	Female	59.79	RS1	151.07	104.22	41.491	21.215	103.97	42.72	116.46	66.65	62.8	54.443	66.65	63.6	104.38	42.146	30.132	66.248	42.08	29.572	85.766	47.357	69.859	85.003	21.43	36.602	84.78	34.5	24.863
1134	Male	60.52	RS1	162.03	91.977	30.75	22.137	93.895	26.876	123.78	51.025	54	60.303	51.514	50.8	111.75	30.99	11.198	74.17	29.397	9.6758	91.097	25.28	62.893	94.08	3.4616	15.793	93.692	21.513	5.5252
1135	Male	59.13	RS1	154.22	96.528	40.674	19.974	114.25	38.195	113.04	59.814	62.8	47.607	68.115	59.6	98.533	39.419	25.942	56.071	44.908	24.296	75.505	36.325	68.03	73.657	13.525	29.701	76.234	33.571	18.544
1136	Male	60.13	RS1	156.77	99.038	22.705	22.841	101.08	19.299	121.83	46.143	34	55.908	47.119	30.8	109.09	34.034	3.4836	72.348	35.052	2.4354	89.278	20.256	38.656	92.102	12.365	3.6972	90.857	32.106	1.5582
1137	Male	59.6	RS1	153.79	107.84	21.996	24.478	98.896	24.1	124.76	63.232	40.4	57.373	58.838	43.6	108.51	42.177	2.6616	73.743	41.607	3.7217	92.649	35.73	48.385	94.005	18.776	4.7725	90.219	35.493	-0.48171
1138	Male	59.32	RS1	162.62	108.34	39.182	30.722	95.662	34.218	133.06	69.58	70.8	66.162	63.232	67.6	121.54	40.487	31.351	82.445	37.72	30.252	100.98	43.655	78.098	102.41	14.683	39.397	101.82	28.942	25.666
1139	Female	59.84	RS1	152.86	97.143	33.703	32.74	98.178	30.843	122.8	55.42	50.8	62.744	55.908	50	108.79	40.658	8.436	75.943	39.982	7.6712	93.027	34.31	53.128	92.851	18.562	11.172	92.402	34.738	2.5571
1140	Female	60.7	RS1	148.64	109.28	31.65	26.02	107.58	36.364	117.43	68.115	48.4	57.861	67.627	51.6	103.16	48.167	11.495	68.17	49.023	14.447	87.467	44.669	57.803	84.562	23.223	19.075	84.933	40.067	7.5279
1141	Male	60.46	RS1	153.42	103.52	25.662	25.109	108.69	24.064	121.83	59.326	42	55.42	61.279	40.4	105.35	43.892	7.6913	71.193	45.665	6.2161	87.956	37.921	48.18	87.613	20.706	9.5231	88.297	38.43	1.6956
1142	Female	59.99	RS1	153.44	110.75	29.645	26.488	104.41	27.288	125.24	68.603	42.8	58.838	64.697	41.2	112.32	47.301	5.4074	75.527	45.495	5.3808	93.283	41.008	46.598	95.801	24.642	7.3281	94.743	39.751	1.3532
1143	Male	59.5	RS1	148.31	97.372	37.062	17.967	96.413	40.119	114.5	55.908	65.2	51.025	56.885	66	103.88	28.675	28.872	63.348	27.892	27.054	82.923	36.594	77.553	86.927	3.0833	38.793	83.286	17.819	22.301
1144	Female	58.77	RS1	143.91	109.68	33.468	21.334	112.57	33.1	112.06	69.092	48.4	50.537	70.557	48.4	96.418	55.058	6.0063	62.404	55.085	6.077	80.272	43.051	52.565	79.602	31.637	6.0748	79.208	49.904	-0.21654
1145	Female	60.38	RS1	150.39	117.07	30.588	29.378	113.09	36.598	120.36	73.975	43.6	63.232	72.51	47.6	106.83	53.585	6.0529	73.069	52.042	6.9668	93.186	48.893	50.168	91.814	30.206	7.6233	90.526	45.467	-0.65025
1146	Male	59.76	RS1	154.65	100.83	28.767	24.829	98.179	26.249	122.31	59.326	47.6	55.908	57.373	46.8	108.31	38.566	10.524	72.732	38.286	10.314	91.515	32.898	57.581	93.117	11.652	16.507	91.142	30.85	5.8934
1147	Male	60.32	RS1	165.45	107.68	34.109	34.578	95.572	31.43	136.47	65.674	57.2	74.951	58.838	57.2	130.21	44.41	16.324	90.949	38.814	15.576	109.54	38.49	65.542	116.05	17.75	22.058	112.51	34.5	10.398
1148	Female	59.35	RS1	160.91	98.424	42.882	28.741	98.973	34.259	128.66	60.791	60.4	63.232	60.303	55.6	116.44	40.474	21.568	79.498	39.755	19.188	95.809	35.569	63.754	97.178	16.182	24.051	97.405	33.864	13.344
1149	Female	59.42	RS1	160.13	104.63	38.213	26.408	98.716	38.45	127.69	63.232	60.4	64.697	59.814	61.2	114.75	39.164	23.836	80.37	35.738	23.827	96.293	40.772	67.421	98.374	19.306	31.314	97.36	32.602	18.917
1150	Female	59.4	RS1	146.19	104.63	34.107	27.035	107.9	34.388	114.99	64.209	46.8	56.885	66.162	47.6	98.931	52.421	8.4814	68.027	52.888	9.5186	85.315	44.991	51.511	81.824	30.747	12.626	83.041	47.092	3.3132
1151	Female	59.24	RS1	150.38	112.09	39.317	23.509	108.57	42.857	116.46	72.51	52.4	59.326	70.557	54	104.24	57.363	11.935	68.601	62.181	13.826	88.942	50.483	56.442	85.833	35.287	15.449	86.072	52.371	7.3431
1152	Female	59.86	RS1	152.76	102.92	32.678	26.524	104.88	29.871	114.99	59.814	50	59.326	60.303	48.4	103.62	41.768	12.523	70.005	41.255	10.454	85.842	36.306	54.503	88.907	19.538	15.237	87.334	35.333	6.117
1153	Female	59.22	RS1	148.6	101.95	35.82	19.865	98.906	42.671	119.38	60.303	56.4	50.537	59.814	62	102.92	38.35	22.996	63.542	36.97	25.424	85.671	38.056	62.833	83.869	15.475	28.655	82.604	31.265	17.824
1154	Female	59.76	RS1	160.09	93.706	30.55	40.074	91.268	25.846	131.59	49.561	44.4	71.533	48.584	42	120.47	35.443	7.5913	86.117	33.781	6.9695	101.18	30.186	49.284	102.66	13.561	9.024	103.6	28.485	3.1657
1155	Male	60.37	RS1	156.03	98.456	35.15	26.355	100.52	31.09	121.34	54.932	53.2	56.396	56.396	50.8	109.25	39.192	10.847	73.344	37.813	8.1613	88.935	31.467	60.934	95.195	9.2562	13.295	93.352	30.982	3.2675
1156	Male	58.94	RS1	152.18	97.298	25.819	18.033	107.16	26.381	116.46	53.467	38	47.607	56.885	39.6	100.8	38.164	3.3059	64.657	40.633	5.3379	81.552	28.358	43.542	82.98	13.64	5.3924	84.951	31.864	1.6536
1157	Male	59.99	RS1	165.51	100.04	25.957	20.11	87.262	31.289	133.54	49.561	47.6	65.186	44.189	50.8	121.22	33.405	7.9622	77.132	28.759	7.2586	102.24	24.516	59.127	102.95	1.7888	14.465	99.785	23.106	2.3026
1158	Female	58.73	RS1	150.72	100.81	40.273	28.92	95.839	38.165	122.31	62.744	59.6	60.791	60.791	58.8	110.04	38.651	26.828	73.938	36.894	25.046	91.646	39.948	67.58	92.901	14.292	33.233	92.806	29.448	20.94
1159	Female	60.2	RS1	153.37	114.59	26.704	29.54	108.09	30.107	128.66	67.139	42.8	64.209	65.674	44.4	114.64	49.851	4.6744	78.769	48.007	4.8998	97.163	44.559	46.673	98.6	25.989	6.4453	97.241	42.157	0.016531
1160	Female	60.51	RS1	148.3	119.21	33.26	24.782	120.99	34.274	117.43	76.904	46.8	53.955	80.811	48.4	100.64	58.655	7.1551	66.669	57.97	8.2778	85.032	47.805	51.672	83.869	33.035	8.9939	83.628	51.125	1.1272
1161	Female	59.23	RS1	151.92	131.31	35.917	31.059	116.9	32.657	123.78	88.623	49.2	69.092	81.299	48.4	115.84	71.221	10.225	83.205	65.412	9.2102	100.89	59.388	49.539	102.43	49.17	10.637	100.65	62.091	3.8137
1162	Female	58.86	RS1	152.78	104.97	31.913	29.546	108.29	26.795	119.87	70.068	39.6	62.744	70.068	36.4	111.51	59.823	5.4675	76.367	58.91	4.9808	90.159	45.387	35.561	93.068	39.339	3.2005	94.499	56.104	2.4647
1163	Male	60.35	RS1	154.91	103.37	34.023	21.142	98.814	31.622	121.34	58.838	51.6	56.885	56.885	50.8	107.54	38.552	8.9796	70.928	38.337	8.1209	88.801	35.054	57.225	86.458	12.802	13.038	88.015	30.026	3.4812
1164	Male	60.41	RS1	155.04	98.947	22.734	19.846	102.3	25.155	119.38	50.537	38.8	52.978	52.49	38.8	103.87	37.82	4.296	67.656	38.722	4.2265	86.481	28.337	42.02	86.766	13.146	4.3369	86.347	30.621	1.5761
1165	Female	60.22	RS1	146.47	121.56	36.8	27.886	101.91	38.197	121.83	78.857	55.6	62.744	68.603	57.2	112.68	54	15.567	77.972	47.215	14.639	96.471	49.209	63.156	99.484	29.028	19.944	96.479	43.821	9.4892
1166	Female	60.22	RS1	159.09	109.08	32.902	24.501	108.41	30.651	123.78	66.65	49.2	61.279	66.65	47.6	113.59	47.824	6.1389	77.62	45.558	6.3655	93.015	38.117	52.159	97.312	20.347	8.5568	96.019	39.804	1.0106
1167	Male	59.34	RS1	151.54	90.824	38.266	24.126	97.87	37.951	118.9	59.326	67.6	52.49	62.744	67.6	105.56	32.672	30.501	63.96	35.757	29.378	84.94	37.535	76.632	83.973	7.815	35.135	83.293	26.185	22.483
1168	Male	59.89	RS1	154.63	103.26	38.944	23.702	99.05	41.899	121.34	59.326	57.2	58.35	56.885	58.8	111.22	33.775	19.435	72.44	30.587	19.051	91.409	29.75	66.847	92.92	4.8001	25.349	93.054	21.87	11.525
1169	Male	59.46	RS1	154.6	104.27	33.212	24.422	103.44	28.474	119.38	65.674	56.4	57.861	66.162	54	107.94	41.882	19.566	69.68	41.396	17.719	87.799	41.149	67.437	87.393	13.349	26.744	87.743	32.069	12.388
1170	Female	60.23	RS1	151.04	117.65	33.357	24.615	110.15	42.422	122.31	76.416	57.2	60.303	72.998	61.2	107.82	53.219	19.354	70.724	50.373	21.809	92.757	54.516	68.337	90.311	26.695	28.041	89.431	43.314	15.245
1171	Male	60.12	RS1	154.59	101.93	29.112	19.108	93.065	40.813	124.76	55.42	61.2	58.35	52.002	68.4	107.97	31.923	23.02	69.611	27.358	25.575	94.452	33.465	78.898	94.015	3.2208	35.911	90.008	20.225	19.948
1172	Male	60.54	RS1	154.05	99.905	37.03	30.093	95.242	37.573	123.29	58.838	55.6	62.744	57.373	56.4	112.29	35.868	19.528	75.334	35.482	19.372	92.19	30.835	63.257	93.26	7.6188	25.26	92.92	25.626	14.702
1173	Female	60.67	RS1	143.88	107.97	33.935	19.222	110.49	52.881	112.55	72.998	56.4	52.002	76.416	66	92.847	49.822	22.027	60.664	50.803	26.185	82.904	50.309	67.82	75.541	29.273	28.753	74.41	43.841	17.853
1174	Male	60.12	RS1	148.26	95.614	34.525	18.155	98.525	41.675	115.48	50.049	58	50.049	52.002	62.8	99.163	31.771	18.39	58.576	32.115	19.258	82.88	27.162	70.377	79.34	4.2026	26.239	78.876	22.346	12.094
1175	Female	58.62	RS1	153.65	110.46	27.162	35.622	96.421	26.633	128.17	62.744	38	70.068	57.861	38	116.64	65.295	1.9765	83.976	61.551	1.9669	100.75	42.492	42.897	102.14	36.554	4.5393	100.66	59.494	0.34863
1176	Female	59.82	RS1	157.53	115.08	26.617	34.417	100.19	37.292	132.08	70.068	37.2	72.998	61.768	42	118.25	56.602	6.0554	86.336	49.34	7.7215	105.9	44.571	39.79	106.98	30.237	6.2002	103.92	47.823	1.3096
1177	Male	59.05	RS1	156.06	97.804	39.212	31.814	113.61	25.389	120.85	56.885	49.2	55.42	63.232	38.8	110.16	48.47	6.5706	75.677	51.133	5.4235	85.737	37.112	48.457	89.959	22.283	7.6081	92.787	42.773	1.1707
1178	Female	59.76	RS1	150.83	117.6	27.958	31.895	119.62	19.618	119.87	81.299	50.8	58.838	82.275	46.8	106.98	64.741	12.216	72.722	65.666	10.432	88.381	61.552	54.315	89.054	44.301	15.86	89.408	58.393	6.6012
1179	Male	60.05	RS1	154.95	108.7	30.671	22.591	105.25	29.223	121.83	57.861	44.4	57.861	55.908	42.8	112.59	37.426	4.9271	68.445	36.458	6.5292	90.824	32.69	53.15	90.076	6.8462	7.3435	91.056	28.328	-0.14962
1180	Male	60.04	RS1	151.57	95.212	24.086	15.686	100.48	29.322	118.41	62.256	58.8	50.049	64.209	59.6	103.06	33.951	18.902	60.042	33.303	18.607	82.789	35.712	69.213	85.911	4.574	26.767	82.116	24.429	12.425
1181	Female	59.42	RS1	155.25	110.79	21.91	27.771	101.93	26.596	127.69	66.65	42.8	64.697	62.256	45.2	116.53	45.951	6.5003	79.885	42.344	6.5391	98.146	42.951	50.386	100.08	22.058	9.4713	98.807	37.401	0.32121
1182	Male	60.08	RS1	151.28	98.427	26.856	17.94	98.482	31.501	119.87	57.373	49.2	51.514	55.908	52.4	103	37.821	6.989	60.301	37.444	8.9982	85.462	31.659	55.225	80.698	13.65	7.8354	80.682	32.082	1.5186
1183	Female	59.22	RS1	147.61	107.01	20.488	19.042	112.86	33.337	113.53	69.58	34.8	51.514	72.998	41.2	93.933	53.44	5.2806	60.368	53.259	5.4466	81.937	46.6	42.84	78.206	31.137	7.0843	76.732	46.916	1.623
1184	Male	59.66	RS1	159.19	121.01	31.31	25.873	106.5	27.491	128.66	77.393	56.4	62.256	70.068	55.6	119.96	49.434	16.699	79.103	45.364	16.217	99.049	50.686	63.468	101.12	25.255	23.479	100.45	38.297	11.76
1185	Male	60.62	RS1	157.33	107.88	38.116	25.186	99.792	26.691	125.73	56.885	54	64.209	54.932	48.4	118.51	39.338	9.8839	80.266	35.755	6.8946	95.897	29.068	58.312	100.92	9.0091	12.842	100.13	29.819	2.7382
1186	Female	58.74	RS1	154.29	112.73	33.491	29.018	102.66	32.203	127.69	68.115	51.6	62.744	63.232	50.8	117.99	45.917	13.201	75.357	41.8	12.912	97.318	42.181	54.24	98.596	24.07	17.57	97.077	39.26	7.1933
1187	Male	60.43	RS1	154.88	103.86	25.22	25.06	106.42	20.258	119.38	53.467	32.4	55.908	55.908	29.2	109.55	43.001	4.2279	68.988	45.11	1.7976	86.384	29.306	34.371	87.926	20.73	2.9588	90.04	40.555	0.70689
1188	Female	59.33	RS1	156.11	105.83	35.546	38.896	90.432	50.456	135.99	70.068	67.6	76.904	60.791	74.8	122.6	42.414	33.245	88.974	37.535	38.383	110.91	43.861	80.539	109.34	17.854	42.478	106.03	30.847	31.91
1189	Male	59.15	RS1	154.01	101.18	27.788	23.906	100.34	29.651	124.27	62.256	54.8	56.885	62.256	57.2	109.51	35.648	8.9421	69.653	33.152	9.7505	91.198	36.112	64.681	91.923	4.952	17.619	90.12	24.147	2.6697
1190	Male	59.07	RS1	153.73	89.432	29.034	23.27	94.332	22.637	121.83	50.049	50	54.932	52.49	46.8	107.98	26.239	13.979	68.228	28.529	12.396	87.614	26.032	61.665	87.991	1.8938	18.674	87.897	18.466	7.9942
1191	Female	60.1	RS1	154.61	104.94	42.991	29.738	94.943	49.381	128.17	70.557	74	65.674	67.139	78	113.76	42.075	42.2	79.414	40.4	44.291	98.212	45.136	86.456	97.137	19.67	50.304	95.773	33.176	37.917
1192	Female	60.27	RS1	148.68	107.51	30.574	26.822	113.84	27.763	116.46	64.209	42.8	52.002	68.115	42	100.34	52.399	5.2888	64.383	54.908	4.8214	83.079	45.042	44.595	81.365	31.904	4.4885	82.181	47.363	2.6401
1193	Female	59.98	RS1	147.57	100.81	39.772	29.374	97.351	49.785	118.9	63.232	61.2	62.256	61.279	66	102.03	44.9	24.193	72.699	43.049	26.452	91.866	41.169	74.13	90.091	19.1	30.19	87.863	36.009	18.851
1194	Male	59.97	RS1	153.4	93.239	32.122	19.627	100.67	34.697	115.97	51.514	53.2	54.443	53.467	55.6	101.39	30.858	16.235	62.628	32.993	17.758	84.895	30.038	62.285	81.14	6.4212	23.635	80.72	23.516	11.31
1195	Female	60.16	RS1	154.13	107.94	29.562	29.204	102.81	31.995	125.73	64.697	49.2	63.721	60.791	50.8	114.44	45.88	11.252	73.13	42.661	11.138	95.449	41.909	59.464	96.47	18.891	19.076	93.926	36.122	6.3929
1196	Female	58.96	RS1	152.33	100.96	28.995	26.511	100.72	22.053	120.36	61.768	37.2	58.35	62.256	34	110.96	45.306	5.7683	71.136	45.44	4.26	88.775	36.716	37.37	91.394	26.552	0.0087295	92.984	40.395	2.373
1197	Female	61.03	RS1	149.17	117.41	28.706	27.32	110.12	41.096	121.83	75.928	50.8	62.744	72.021	57.2	108.16	55.747	15.628	73.171	52.539	18.107	94.273	51.764	59.771	92.58	31.237	25.011	90.358	47.116	11.964
1198	Male	58.69	RS1	155.64	95.314	34.675	23.594	83.364	38.805	130.62	55.42	63.6	61.768	49.561	66	119.39	29.629	29.699	78.585	24.879	30.59	100.44	28.185	74.927	101.85	4.3232	39.705	100.03	18.276	26.073
1199	Female	58.92	RS1	154.47	106.36	45.116	30.951	102.45	42.403	126.71	64.697	63.6	65.186	62.744	62	116.65	41.272	23.426	82.266	38.683	22.503	97.216	41.714	69.739	100.91	16.366	30.413	100.78	31.204	17.983
1200	Male	60.28	RS1	157.46	93.757	41.729	28.257	97.647	33.867	121.34	53.467	60.4	61.279	55.42	54.8	110.89	40.357	16.733	75.182	41.387	13.894	89.909	34.747	64.857	93.188	17.579	18.027	93.008	33.164	9.8039
1201	Female	60.16	RS1	152.47	99.313	37.783	25.255	89.495	36.911	123.78	54.443	57.2	60.791	50.049	56.4	111.97	34.931	17.235	74.28	32.248	17.232	93.578	29.699	58.785	93.899	14.473	21.062	92.977	27.611	11.551
1202	Male	59.15	RS1	157.48	92.768	42.127	19.269	94.36	36.037	118.9	55.42	63.6	53.467	58.35	61.2	104.3	34.065	22.406	69.376	35.731	21.088	84.915	32.804	69.523	86.508	8.1472	27.159	85.927	27.237	14.511
1203	Male	60.17	RS1	152	104.26	20.258	20.991	107.67	23.301	116.46	65.186	34.8	55.42	66.162	34.8	102.46	49.903	4.1428	65.863	50.231	3.4747	84.765	37.105	39.382	83.218	23.429	3.7012	84.204	44.347	0.52239
1204	Female	59.46	RS1	156.33	112.25	29.288	34.457	109.7	34.271	128.17	70.557	41.2	68.115	68.603	42.8	111.39	56.612	5.6494	78.476	55.529	4.4683	99.591	43.243	44.242	94.745	32.804	7.3248	94.898	49.592	2.3459
1205	Female	58.57	RS1	150.14	102.85	35.246	29.139	103.43	28.255	117.92	64.697	55.6	59.814	64.697	53.2	106.64	37.111	21.217	73.936	36.863	18.068	88.37	40.345	61.913	91.399	16.807	26.353	91.054	29.631	14.344
1206	Male	60.22	RS1	156.86	120.81	26.841	23.073	100.3	27.664	130.13	67.139	41.2	63.721	57.861	40.4	116.06	50.814	5.3225	79.351	46.904	4.2854	99.957	35.599	42.788	101.69	24.016	6.3287	98.71	42.175	1.5742
1207	Female	59.1	RS1	152.29	105.37	34.756	35.276	104.91	38.441	125.73	68.603	54.8	64.209	67.627	56.4	105.84	52.225	16.314	78.136	51.792	16.914	95.351	46.623	57.662	91.707	32.465	17.04	90.769	45.832	9.8264
1208	Female	58.34	RS1	151.49	103.16	26.316	28.218	101.98	24.271	124.27	56.885	40.4	56.885	55.908	39.6	111.5	41.802	5.1259	72.405	41.511	4.2847	90.533	29.376	42.453	92.413	20.025	2.9001	92.641	36.882	-0.48191
1209	Female	60.33	RS1	155.18	99.912	34.936	30.131	100.47	26.606	122.31	56.885	48.4	58.838	55.908	42	112.77	36.637	5.3547	76.491	37.196	4.5767	91.808	30.625	47.67	93.956	13.545	5.4058	95.359	30.147	-1.0538
1210	Male	60.24	RS1	146.58	102.64	32.483	18.089	97.429	32.124	113.53	61.279	45.2	51.514	58.838	45.2	100.02	47.021	3.4327	66.138	44.779	4.439	82.909	34.704	48.188	85.382	20.191	6.4767	84.941	39.075	1.4874
1211	Male	58.93	RS1	158.57	97.698	39.476	22.914	94.384	38.524	128.66	56.396	63.6	58.35	54.932	63.6	114.68	34.837	23.607	78.07	32.515	22.514	95.255	33.128	74.313	98.408	6.2202	30.689	97.877	24.092	19.191
1212	Female	60.17	RS1	149.24	95.334	31.611	28.313	95.856	30.307	118.41	57.861	38.8	59.814	56.396	38.8	108.59	43.778	5.2877	68.922	43.606	5.1236	89.691	31.283	39.417	90.241	21.709	5.1976	89.241	38.946	2.7422
1213	Male	59.98	RS1	145.82	94.152	38.357	15.115	102.31	41.322	109.62	54.443	54	46.631	60.303	55.6	91.828	35.185	12.267	55.89	38.5	13.834	75.049	31.613	60.027	72.219	13.472	15.817	71.607	30.18	6.6456
1214	Male	59.42	RS1	155.38	104.17	28.061	22.676	100.67	32.352	124.27	57.861	51.6	57.373	58.838	53.2	107.18	37.754	12.237	69.772	37.982	14.553	89.974	35.818	60.165	87.93	12.251	21.154	87.127	30.038	10.058
1215	Male	58.78	RS1	155.64	104.32	36.375	32.983	88.939	31.297	129.64	57.861	54	68.115	48.096	51.6	120.4	38.261	9.4681	84.834	32.986	7.8071	101.67	22.24	58.23	103.46	6.413	9.9422	103.9	28.062	1.8794
1216	Female	58.53	RS1	149.79	99.475	36.855	27.419	100.2	32.05	117.43	57.373	49.2	58.35	57.373	46.8	105.83	42.784	8.478	70.357	42.274	8.0258	86.65	36.831	54.998	88.305	17.978	13.249	88.644	35.096	2.9084
1217	Female	59.41	RS1	143.62	113.58	30.134	21.494	116.8	27.142	110.11	71.045	42	47.607	71.533	41.2	95.189	55.384	4.8599	60.509	56.97	5.1528	78.277	46.188	43.541	78.808	33.881	4.6558	78.378	50.31	0.71431
1218	Male	58.46	RS1	155.23	98.266	29.841	21.824	98.993	30.681	122.31	51.514	43.6	55.42	52.002	43.6	105.14	37.667	5.0687	69.882	39.162	4.982	87.274	26.741	49.891	89.143	10.734	8.0828	87.453	30.988	1.6461
1219	Male	59.9	RS1	158.86	106.68	30.057	18.196	105.11	34.082	120.85	59.326	51.6	53.467	59.326	54	109	37.55	12.868	65.782	37.307	12.445	87.795	33.054	64.888	89.337	6.1903	20	87.988	26.78	5.5982
1220	Female	60.33	RS1	150.4	100.43	41.344	23.873	101.11	48.571	120.36	60.303	58.8	56.885	59.326	64.4	102.61	43.676	24.471	68.033	42.431	28.017	89.177	41.85	69.074	86.445	21.932	30.074	85.642	36.641	19.44
1221	Female	59.88	RS1	145.09	108.68	25.34	19.927	114.57	26.93	111.08	68.115	39.6	48.096	70.068	41.2	94.31	52.489	5.1633	61.579	53.722	5.2282	77.883	43.764	45.501	76.943	30.095	7.4254	77.04	46.449	2.5063
1222	Female	59.98	RS1	156.94	108.13	32.921	33.036	109.8	32.564	127.2	68.603	51.6	64.209	69.092	52.4	111.51	53.008	12.209	77.957	52.012	11.099	94.263	45.37	56.494	94.994	32.698	14.566	95.583	47.185	5.2626
1223	Male	59.74	RS1	151.05	103.51	33.18	24.189	99.207	36.458	120.85	58.35	52.4	55.908	57.373	54.8	106.63	36.111	10.316	68.768	33.798	10.46	90.743	29.6	61.542	88.845	5.9353	16.884	86.93	25.631	5.2345
1224	Male	60.06	RS1	150.01	101.24	46.202	22.11	105.56	43.13	114.5	63.232	58.8	55.42	63.232	58	106.03	47.34	16.23	66.95	45.522	15.64	86.576	39.742	69.006	89.871	19.622	22.864	87.356	37.67	8.4948
1225	Female	60.19	RS1	159.67	98.169	35.246	32.84	97.469	24.99	126.71	55.42	39.6	64.209	55.42	34	113.76	41.483	4.1256	80.686	42.002	3.8984	95.394	31.587	39.844	97.613	20.17	3.6039	98.145	35.69	1.4722
1226	Female	59.93	RS1	146.22	104.29	24.46	22.323	104.37	26.606	114.01	70.557	40.4	52.978	67.627	42	99.343	52.151	3.4146	65.58	52.488	4.7459	84.589	41.94	44.514	82.205	31.79	4.1576	82.571	46.829	0.80359
1227	Female	60.05	RS1	155.1	115.76	33.997	29.744	105.27	32.156	123.78	72.998	43.6	66.162	70.068	44.4	111	58.689	6.1142	80.12	56.406	5.7708	96.38	48.787	49.626	97.238	35.445	7.7177	95.745	51.334	1.8481
1228	Male	59.84	RS1	162.31	109.07	34.891	28.864	93.59	32.838	131.1	63.232	57.2	71.533	54.443	55.6	121.39	37.145	15.267	84.341	33.742	14.908	103.92	32.27	63.555	104.23	9.4943	22.31	102.92	26.259	9.4366
1229	Female	59.4	RS1	152.75	108.91	37.31	29.265	106.79	42.943	123.78	67.627	61.2	59.814	67.139	63.6	109.35	46.229	23.048	74.697	47.437	24.85	93.449	46.553	69.819	91.72	25.681	31.343	92.03	39.105	18.779
1230	Female	58.81	RS1	150.31	96.86	27.396	25.221	90.993	33.249	123.29	56.396	52.4	59.326	52.978	56.4	105.17	34.72	12.146	75.485	32.898	12.446	93.535	29.888	62.531	92.393	7.045	16.474	91.093	24.923	6.1055
1231	Male	59.18	RS1	154.84	103.76	21.02	21.692	104.6	22.235	120.36	54.932	29.2	55.42	56.396	29.2	104.11	47.622	3.5101	71.219	48.552	2.8591	87.453	31.479	35.831	87.249	24.054	4.0573	86.137	44.375	3.5722
1232	Female	59.88	RS1	149.67	105.28	38.94	26.108	108.3	36.379	117.43	65.186	54	53.955	67.627	53.2	102.58	45.577	16.252	69.781	45.898	15.241	84.55	45.136	56.628	85.204	24.497	21.365	85.464	37.863	9.5142
1233	Female	58.22	RS1	153.53	112.04	19.148	25.969	102.14	24.323	125.73	64.209	30.8	61.279	59.326	34.8	112.54	50.706	3.9613	71.732	47.45	5.0202	95.75	40.07	36.523	94.055	30.89	3.3044	92.631	44.76	1.0844
1234	Male	58.4	RS1	149.46	99.173	26.108	24.537	106.18	21.247	113.53	62.256	43.6	50.049	66.162	42	101.63	40.761	7.5979	65.485	40.582	6.1401	81.214	38.845	53.651	82.841	12.519	10.473	84.71	32.546	1.7563
1235	Female	60.13	RS1	154.7	100.42	35.361	28.137	105.31	27.693	121.83	60.303	45.2	58.838	60.791	40.4	112.02	43.042	6.5521	74.904	43.447	4.7839	90.208	34.213	47.157	92.697	19.839	6.6016	93.816	36.14	0.20361
1236	Female	59.69	RS1	153.34	91.398	33.379	30.832	88.516	37.25	122.8	56.885	50.8	63.721	56.885	54	110.57	36.643	9.9536	73.858	34.574	11.274	93.203	31.562	55.323	95.017	13.618	13.044	92.95	28.655	3.6942
1237	Female	59.36	RS1	152.39	100.35	36.137	27.871	105.83	30.293	119.38	62.744	47.6	56.885	65.186	44.4	106.32	43.023	8.0709	71.258	45.209	7.619	86.576	36.747	50.899	86.948	20.576	10.918	88.777	36.724	2.9133
1238	Male	59.73	RS1	154.23	106.27	35.07	24.737	106.09	38.62	124.76	66.65	56.4	56.885	66.162	58.8	108.35	38.953	20.718	69.796	40.483	21.339	92	38.746	66.526	89.185	12.82	25.949	87.736	30.233	14.211
1239	Female	58.95	RS1	150.25	120.43	29.989	28.086	126.17	31.067	116.46	82.764	49.2	58.35	87.158	50	100.69	62.466	13.133	65.539	64.829	13.454	86.218	61.353	54.879	81.227	40.851	18.288	81.443	57.162	9.2873
1240	Male	58.6	RS1	153.75	102.27	29.399	24.24	99.204	25.443	121.34	61.279	42	58.35	59.326	40.4	108.31	47.481	5.9362	72.74	46.434	6.194	89.447	34.93	46.145	88.54	19.818	7.2959	89.86	39.531	3.4494
1241	Male	59.69	RS1	142.4	95.128	18.121	18.243	121.91	23.208	106.69	58.838	23.6	40.283	73.486	26.8	87.997	51.824	4.0784	53.511	57.63	3.2542	66.621	34.203	24.31	66.483	29.032	-1.6682	69.563	51.321	1.5213
1242	Female	59.4	RS1	153.89	108.4	33.407	27.9	108.13	35.81	122.31	69.58	50.8	61.768	70.068	52.4	110.76	46.845	14.468	72.896	46.584	15.496	93.206	43.699	54.769	92.803	25.835	16.821	91.943	40.441	6.3929
1243	Male	58.8	RS1	155.71	97.459	32.14	29.143	96.227	32.056	123.78	52.49	47.6	59.326	53.467	48.4	107.59	34.634	8.3676	72.553	34.331	8.8517	91.153	27.72	55.878	90.375	7.7641	11.731	89.282	27.013	2.882
1244	Male	58.67	RS1	156.62	101.17	32.238	26.678	97.848	28.951	124.76	52.978	51.6	60.303	50.049	50	111.82	32.762	9.0835	72.846	31.332	9.02	92.599	29.958	60.866	91.949	3.4753	15.144	92.338	22.386	3.4735
1245	Female	58.16	RS1	151.99	110.14	34.175	27.631	107.97	32.314	122.8	69.092	48.4	57.373	67.627	48.4	108.22	53.548	10.72	72.658	52.822	9.7743	90.415	47.357	56.057	90.091	30.394	13.613	90.148	45.971	5.3397
1246	Male	58.99	RS1	155.76	106.34	33.221	20.721	108.97	31.266	118.9	66.162	58	54.443	67.627	57.2	104.76	42.449	18.282	67.898	43.285	15.847	86.388	41.66	66.996	86.023	18.013	26.733	86.73	34.133	12.735
1247	Male	58.91	RS1	152.72	101.51	38.772	22.589	92.241	41.687	120.36	66.65	70	57.373	64.209	71.6	110.29	36.42	35.152	69.08	32.781	36.469	91.402	40.334	80.704	94.127	7.9802	46.301	89.802	24.134	32.334
1248	Female	58.35	RS1	156.16	106.95	39.289	29.976	110.27	35.959	122.8	69.58	59.6	60.791	70.557	58.8	108.77	49.573	21.539	77.394	49.79	20.022	91.1	48.976	65.695	93.978	28.119	27.133	94.157	42.615	17.152
1249	Female	59.37	RS1	158.12	103.26	29.857	35.064	92.922	26.291	130.62	60.791	46.8	69.092	55.908	46	120.11	41.255	6.43	83.73	38.869	5.9422	101.86	32.166	49.791	102.64	17.805	7.8748	102.4	33.983	1.5118
1250	Male	58.53	RS1	156.07	103.19	32.567	21.831	111.99	30.87	120.36	61.768	54.8	52.978	65.674	52.4	101.61	43.311	14.428	64.424	44.89	14.037	85.07	37.48	58.098	82.126	20.404	15.466	81.73	38.499	8.38
1251	Male	60	RS1	157.23	95.24	31.539	23.843	97.68	32.852	120.85	52.978	51.6	56.396	54.932	53.2	109.3	32.528	16.446	67.133	31.612	17.331	87.4	30.494	60.887	89.417	3.3213	21.458	87.964	22.164	10.347
1252	Male	58.44	RS1	155.74	100.54	40.405	26.557	99.279	49.111	122.8	65.674	66.8	61.279	64.209	70	110.18	37.048	25.575	71.129	36.291	29.241	94.215	43.961	78.639	91.83	11.119	37.781	90.491	25.944	22.042
1253	Male	59.52	RS1	147.82	98.551	37.619	15.591	106.74	41.787	111.57	59.326	66.8	47.119	64.697	67.6	97.228	34.079	25.272	54.742	37.668	26.885	77.659	37.955	79.438	75.605	5.7964	36.308	75.029	24.006	20.312
1254	Female	58.18	RS1	158.29	101.89	35.68	34.425	104.95	24.631	126.22	61.768	46	64.697	62.256	39.6	114.47	49.752	5.7211	81.572	48.848	4.0956	95.727	37.112	41.201	98.724	29.367	3.6681	98.765	44.939	0.66315
1255	Female	59.3	RS1	145.75	110.82	23.228	21.483	108.62	32.101	113.04	68.603	38.8	54.443	71.045	45.2	98.318	48.632	6.5271	66.073	48.386	7.4167	85.151	45.227	48.917	82.336	25.671	8.9767	82.756	41.034	3.72
1256	Male	59.61	RS1	156.76	115.67	30.735	22.373	106.24	31.306	128.66	68.115	57.2	59.814	63.232	57.2	118.07	46.294	14.431	73.159	42.12	15.047	95.84	39.3	66.92	99.318	13.892	18.918	97.609	34.721	6.8145
1257	Female	58.57	RS1	147.37	105.27	36.936	21.955	119.58	36.532	111.57	74.951	51.6	51.025	82.275	50	92.471	58.812	9.1507	61.728	62.959	9.6224	76.996	55.131	56.343	73.228	38.198	9.5953	76.057	53.975	2.2488
1258	Male	58.42	RS1	153.97	108.45	36.955	24.746	103.14	29.308	119.38	65.674	56.4	60.303	67.139	53.2	110.96	44.058	15.301	73.079	41.453	12.064	90.352	38.916	61.766	93.111	15.02	18.234	92.632	33.55	7.096
1259	Female	58.53	RS1	146.13	101.49	27.002	22.518	104.56	31.341	113.04	61.279	46	52.49	64.209	48.4	94.774	44.491	6.5534	65.254	45.245	7.062	81.88	40.339	52.32	78.649	23.366	10.081	79.357	39.267	1.6367
1260	Female	59.5	RS1	146.61	100.76	35.197	26.516	109.68	28.716	111.08	60.791	47.6	51.025	64.697	44.4	96.949	42.747	7.1752	63.998	44.945	6.3705	79.117	39.711	52.754	77.478	20.258	9.175	79.708	37.124	1.1915
1261	Female	59.25	RS1	152	97.92	38.628	21.642	106.36	32.028	113.04	56.885	50.8	52.49	61.768	49.2	102	44.514	7.4675	67.781	46.625	6.5249	80.829	35.396	55.551	84.503	20.64	10.347	85.704	38.502	1.0611
1262	Female	59.55	RS1	154.28	116.49	29.691	31.974	98.179	29.557	128.66	74.463	42.8	68.603	65.674	44.4	116.33	53.207	5.9921	82.048	46.944	5.9645	101.46	43.033	45.763	103.04	27.535	7.9011	100.15	42.777	-0.11139
1263	Male	59.8	RS1	152.03	105.67	31.623	19.684	107.15	36.098	117.92	65.674	46.8	52.978	65.674	49.2	103.87	45.978	8.667	63.037	45.554	10.762	84.796	39.133	50.534	83.255	21.906	12.047	83.089	38.355	4.087
1264	Male	59.04	RS1	160.54	98.876	32.545	22.506	100.45	33.59	126.71	56.396	59.6	56.885	55.908	61.2	110.26	32.8	17.644	70.757	33.09	19.166	91.806	30.919	66.091	90.893	9.4849	23.173	91.206	27.386	13.552
1265	Male	58.76	RS1	155.18	96.122	24.727	19.625	92.884	28.64	121.83	48.096	49.2	55.42	49.072	53.2	110.74	24.222	11.439	66.93	23.577	13.306	89.624	21.93	58.743	89.654	2.0466	16.422	89.227	16.721	6.7052
1266	Male	59.83	RS1	152.28	101.29	22.555	15.36	111.16	27.766	111.08	61.279	45.2	46.143	66.162	50.8	97.856	41.232	7.9874	53.81	44.068	9.77	77.256	41.456	56.43	74.903	15.822	12.517	74.413	34.765	3.1422
1267	Female	59.58	RS1	147.9	103.65	35.104	28.121	96.666	40.221	118.9	61.768	61.2	57.373	60.303	63.6	103.46	34.927	28.25	67.642	35.098	29.164	88.413	36.241	69.281	85.353	13.151	38.085	84.231	26.823	25.118
1268	Male	58.78	RS1	155.52	106.82	27.87	23.76	99.235	34.101	126.71	68.115	58	61.279	63.232	61.2	114.54	40.117	18.321	75.712	36.977	20.633	97.324	39.879	68.403	98.074	9.3766	28.086	96.179	27.36	12.585
1269	Female	59.67	RS1	149.98	122.17	37.397	32.095	121.22	37.031	120.36	85.205	48.4	64.697	84.228	48.4	108.19	65.229	11.808	76.062	65.235	10.97	91.79	58.528	50.086	92.455	42.43	12.73	92.31	59.411	3.6264
1270	Male	59.73	RS1	148.26	88.368	32.697	25.169	97.643	28.892	112.55	65.186	54	53.467	58.35	50.8	99.644	45.342	8.8159	62.936	42.399	9.4709	81.74	37.057	62.339	78.168	18.579	15.872	79.153	35.847	5.3362
1271	Female	58.18	RS1	146	111.74	29.932	24.873	104.03	31.806	119.38	71.533	45.2	56.396	67.139	45.2	107.63	49.18	6.6068	70.269	46.501	7.0027	89.424	43.716	48.64	91.255	24.131	8.8752	90.088	40.877	0.15899
1272	Female	59.52	RS1	155.26	114.93	30.372	24.633	101.87	29.621	126.71	64.209	41.2	61.768	58.35	42	115.83	52.328	7.2073	76.101	48.229	6.8051	96.154	39.424	46.356	98.362	29.048	7.421	97.016	44.844	3.0025
1273	Female	59.15	RS1	150.55	101.34	35.82	28.225	102.79	33.408	120.36	57.373	58.8	55.42	59.814	58.8	105	40.509	16.822	73.92	41.064	16.297	87.732	35.798	66.826	89.269	16.657	22.556	89.615	34.411	11.329
1274	Female	58.55	RS1	151.94	118.95	23.244	29.988	105.42	33.176	130.13	70.557	33.2	61.768	64.209	38.8	111.9	56.465	4.0424	76.176	52.682	4.8128	97.899	42.725	40.319	96.93	33.345	6.3971	94.125	49.926	0.7986
1275	Female	59.87	RS1	149.48	106.16	36.051	31.328	106.79	37.06	120.85	64.697	48.4	62.744	62.744	50.8	109.43	48.379	8.7056	74.375	47.257	8.4143	93.058	42.024	54.649	93.921	21.678	12.921	92.346	40.559	3.5198
1276	Female	59.61	RS1	156.23	113.03	35.019	25.516	106.76	34.961	124.27	69.58	53.2	61.768	64.697	53.2	109.88	47.254	14.565	76.603	44.461	15.02	94.79	42.488	59.93	95.003	19.887	19.864	93.896	38.042	8.2337
1277	Female	58.41	RS1	147.83	102.18	38.736	25.298	110.59	32.663	111.08	62.744	54	52.978	66.65	53.2	98.085	48.412	10.378	63.365	54.566	11.072	79.847	42.926	58.246	77.32	27.995	12.08	79.848	45.644	4.0606
1278	Female	58.75	RS1	161.45	108.14	28.115	30.675	105.01	20.463	129.64	62.256	41.2	64.697	60.303	37.2	114.58	44.136	5.641	81.348	42.669	5.2474	96.8	38.044	47.159	98.815	21.659	6.5674	98.659	36.332	1.7214
1279	Female	59.16	RS1	146.37	116.63	35.357	26.345	109.43	36.265	121.34	65.186	50	55.42	62.744	52.4	105.32	52.529	12.344	72.736	49.846	11.553	90.208	46.481	57.657	91.297	26.466	15.506	88.341	44.468	5.5083
1280	Female	58.59	RS1	154.63	109.14	22	25.77	106.37	25.505	124.27	66.65	38.8	59.814	63.721	41.2	108.82	47.517	4.8291	75.492	45.853	5.2852	93.796	41.586	44.371	93.149	23.979	5.123	92.38	38.953	1.0009
1281	Female	59.12	RS1	150.55	100.71	35.481	28.207	94.946	32.481	119.87	58.35	58.8	58.838	55.908	57.2	108.24	36.138	20.907	73.945	33.897	20.544	90.256	35.493	63.651	92.582	12.925	25.131	91.526	28.441	15.936
1282	Female	58.44	RS1	153.16	106.72	35.851	21.977	107.09	30.797	117.92	65.186	52.4	52.978	65.186	50.8	104.28	45.632	12.177	69.008	46.228	10.559	85.915	41.032	57.083	85.712	25.014	15.519	86.453	41.333	4.7984
1283	Female	58.39	RS1	152.04	97.055	33.52	25.568	97.611	36.072	117.43	58.35	54	57.861	57.861	54.8	103.28	39.286	17.289	69.537	39.449	17.579	87.831	37.843	60.343	86.494	17	23.599	86.005	32.808	12.864
1284	Female	57.9	RS1	150.94	108.68	33.025	24.989	107.54	32.682	118.41	69.092	44.4	57.373	68.115	44.4	106.51	54.202	6.9567	70.45	53.182	6.2885	88.382	44.894	42.644	89.207	31.973	6.6358	88.944	47.982	1.5242
1285	Male	59.74	RS1	153.05	96.236	46.968	24.697	97.494	39.77	118.9	59.814	70.8	54.443	62.744	66.8	106.1	34.587	37.242	69.764	33.694	34.073	86.228	31.947	77.55	87.701	8.9078	42.215	87.837	26.48	30.283
1286	Female	59.7	RS1	156.73	100.1	39.916	29.275	96.62	34.241	127.69	53.955	62.8	59.814	52.978	59.6	114.78	33.866	22.414	79.428	32.893	19.695	93.945	34.657	66.754	99.125	14.527	26.95	97.486	28.271	16.245
1287	Male	59.45	RS1	155.2	93.741	32.264	24.873	96.492	28.648	120.85	51.025	55.6	55.908	51.514	53.2	108.75	29.794	18.598	66.408	30.751	18.403	87.385	29.487	67.662	87.305	3.5961	25.324	87.365	20.381	12.143
1288	Female	59.44	RS1	147.64	103.92	19.747	25.444	102.26	27.001	118.9	58.35	32.4	55.908	58.35	35.6	103.77	49.129	4.1137	69.833	48.84	4.6086	87.591	38.534	35.515	87.602	30.013	2.7503	87.826	44.299	1.1157
1289	Female	58.32	RS1	154.7	100.68	40.215	34.557	91.072	39.347	128.66	62.256	58	67.627	57.373	57.2	118.87	41.257	19.968	80.742	36.418	19.093	99.95	33.489	59.701	101.72	17.036	24.346	101.41	32.383	13.617
1290	Female	59.61	RS1	158.42	108.01	28.36	33.867	99.562	34.901	128.66	63.721	38.8	70.557	59.326	42	115.83	52.973	4.8175	81.138	51.03	5.1613	101.39	39.849	44.014	101.01	28.878	5.0151	98.854	45.763	0.82797
1291	Female	57.87	RS1	148.66	108.29	32.421	26.101	108.72	34.744	118.41	67.627	46	56.396	68.115	47.6	103.31	48.167	6.1494	68.873	48.039	7.318	86.644	43.579	51.05	86.952	24.943	9.9055	86.152	41.516	0.99271
1292	Female	58.04	RS1	151.24	96.561	41.303	27.206	97.52	37.164	118.41	57.861	58	57.373	58.838	57.2	103.88	38.085	21.572	70.084	38.659	20.43	86.741	33.911	64.089	86.209	13.569	25.846	86.63	28.127	15.246
1293	Male	57.96	RS1	161.69	103.3	22.608	20.78	104.91	26.255	124.27	52.002	34	52.978	53.467	35.6	107.48	38.741	4.804	64.945	40.503	4.4572	86.858	27.03	39.333	85.619	15.222	4.0061	85.461	34.221	1.847
1294	Female	58.78	RS1	154.09	105.59	39.655	24.172	97.199	37.234	120.36	64.697	61.2	61.768	61.768	60.4	107.58	47.56	20.604	78.206	44.901	19.306	93.404	44.71	69.033	93.913	28.106	24.169	93.222	41.963	13.98
1295	Male	59.38	RS1	153.68	107.71	29.91	17.427	101.91	32.738	121.34	63.721	51.6	53.955	61.279	54.8	104.48	46.181	12.147	67.883	45.086	13.016	88.951	35.41	61.521	89.079	20.722	14.015	86.752	38.265	5.4887
1296	Female	58.97	RS1	150.55	108.31	27.746	24.83	111.04	26.914	115.48	64.697	46	54.443	67.627	44.4	102.19	44.419	5.2522	62.419	47.17	5.5304	83.336	45.365	50.312	80.083	24.867	7.4484	81.633	38.911	-0.44211
1297	Female	58.75	RS1	150.64	109.92	25.444	27.28	116.06	28.72	119.38	72.021	43.6	55.42	74.463	45.2	102.47	60.247	4.6987	68.987	61.355	4.9813	86.838	50.1	46.648	85.329	39.41	5.952	85.429	54.46	0.058886
1298	Male	58.47	RS1	154.6	109.04	34.403	21.167	100.38	32.406	120.85	62.744	57.2	58.838	60.303	57.2	111.36	40.309	14.48	72.828	36.844	12.295	91.464	37.147	67.825	94.344	11.452	18.468	92.54	30.715	7.428
1299	Female	58.24	RS1	149.35	108.72	44.277	26.616	92.763	40.16	118.9	69.092	66.8	61.279	61.279	64.4	112.21	43.548	31.654	77.878	38.566	30.09	92.472	46.922	73.825	97.809	21.802	38.666	96.113	32.428	25.982
1300	Male	58.46	RS1	151.62	103.61	31.064	27.72	105.28	31.754	116.94	62.256	41.2	58.838	62.256	42	104.55	43.579	3.7864	72.324	43.805	3.2994	90.259	34.33	44.57	91.055	18.235	5.3578	89.957	35.817	0.35351
1301	Female	58.25	RS1	147.99	98.397	45.97	22.479	110.56	43.442	110.6	70.068	70	52.002	77.393	68.4	96.71	42.598	33.608	64.616	45.542	33.111	80.627	52.636	75.685	79.517	24.462	40.967	80.189	36.36	27.935
1302	Female	58.99	RS1	154.08	105.01	35.225	29.583	101.4	37.002	123.29	67.627	49.2	64.209	65.674	50.8	109.44	49.787	11.691	75.843	48.765	12.388	93.9	43.734	55.19	93.468	28.082	15.008	92.623	43.39	6.2166
1303	Male	58.27	RS1	150.47	110.1	39.747	29.011	98.08	39.694	124.27	66.65	58.8	62.256	62.744	59.6	116.78	40.299	26.388	78.084	37.338	26.813	94.245	44.609	71.079	98.696	13.485	36.463	98.446	29.031	22.128
1304	Female	59.55	RS1	149.15	114.43	32.255	33.077	114.21	35.588	122.8	73.486	47.6	62.744	72.998	50	108.87	57.169	9.442	73.927	57.004	11.102	92.908	49.606	52.656	92.661	34.183	11.775	91.27	50.728	3.8953
1305	Male	58.85	RS1	156.48	96.122	29.526	20.687	101.97	30.547	120.36	46.143	42.8	54.443	48.584	42	107.49	33.979	4.7496	67.063	35.535	5.1587	86.702	22.087	45.299	87.614	7.203	5.5882	89.637	27.716	2.4412
1306	Female	59.21	RS1	148.39	108.82	27.874	24.23	113.29	30.56	118.9	73.486	51.6	55.42	74.951	53.2	100.59	46.728	14.858	68.516	45.175	14.98	87.089	49.475	58.891	85.904	24.155	23.935	83.861	37.741	11.769
1307	Female	58.21	RS1	155.74	113.92	20.455	27.691	105.63	26.093	125.24	71.533	34	62.744	67.627	38.8	106.97	56.115	4.1597	76.953	53.534	3.8907	95.232	48.552	41.54	94.145	34.076	2.5737	92.008	47.944	-0.043194
1308	Male	58.53	RS1	156.54	91.785	38.194	20.771	101.13	33.657	117.92	54.443	60.4	55.908	58.838	58	104.63	34.241	22.882	66.906	36.449	21.512	84.81	34.142	68.853	86.366	12.601	25.886	86.305	27.401	14.425
1309	Male	58.23	RS1	159.58	102.03	34.917	19.963	102.47	36.008	123.78	66.162	58.8	55.42	64.697	58.8	109.91	41.087	16.22	68.551	41.882	14.267	89.578	35.551	63.805	88.117	12.314	18.864	88.304	30.987	6.1285
1310	Male	58.35	RS1	155.22	95.479	30.998	20.355	91.842	30.606	120.36	50.049	58	57.373	48.096	58.8	107.87	28.217	14.605	67.066	27.553	13.926	88.457	25.898	67.244	85.884	2.1535	22.624	86.185	18.641	6.5138
1311	Female	59.37	RS1	163.47	110.48	55.897	37.337	87.236	39.585	138.43	70.068	75.6	71.533	57.861	67.6	130.84	42.815	43.388	94.283	36.151	38.782	107.88	41.628	81.803	114.93	23.056	51.445	114.3	35.981	39.144
1312	Male	58.33	RS1	153.54	116.91	30.229	27.415	111.37	36.377	124.76	75.439	47.6	61.768	71.533	52.4	110.29	53.267	6.6708	74.815	50.318	9.7305	97.145	46.382	59.044	94.609	22.473	11.559	91.967	42.215	1.7798
1313	Male	58.21	RS1	157.26	100	21.784	28.534	94.686	17.722	128.66	52.49	30.8	63.232	49.561	26.8	114.64	43.29	5.3251	81.067	43.114	3.315	96.602	27.729	34.856	98.555	21.006	2.5478	98.306	40.371	2.2726
1314	Female	58.35	RS1	157.09	108.92	39.976	34.541	104.82	28.971	125.73	67.139	54	66.162	65.186	48.4	118.25	49.41	15.183	83.118	46.708	11.209	95.993	44.391	56.565	101.76	25.477	16.244	101.65	41.119	6.9655
1315	Male	59.56	RS1	159.61	105.68	38.3	27.368	96.107	30.054	127.69	58.838	58.8	61.768	54.443	54.8	116.08	36.895	17.387	79.26	33.385	13.928	95.014	31.212	64.338	98.528	8.932	20.702	98.809	27.37	10.016
1316	Female	57.85	RS1	151.68	108.64	33.587	36.453	111.53	23.139	122.31	70.068	44.4	62.256	69.58	40.4	109.86	63.845	5.5973	80.616	61.459	4.7666	90.703	46.584	48.577	94.607	35.948	6.6715	95.748	58.076	0.36306
1317	Male	59.09	RS1	149.69	91.467	42.7	23.022	97.214	42.21	115.48	59.814	65.2	54.443	62.744	64.4	104.12	30.327	29.017	62.776	32.955	27.85	84.33	38.911	75.546	82.532	6.5706	41.164	83.372	20.669	25.83
1318	Male	58.28	RS1	149.31	113.4	29.842	24.196	98.464	33.799	122.8	69.092	48.4	60.791	61.279	52.4	111.29	49.064	8.8903	77.475	43.383	9.6497	97.667	41.845	55.118	99.784	18.157	13.965	96.285	37.38	3.2211
1319	Female	58.2	RS1	150.82	109.58	39.919	32.678	90.917	37.866	124.27	68.115	54.8	71.045	59.326	54	115.17	47.401	15.794	84.067	42.959	15.402	100.44	43.086	59.952	101.66	24.781	18.959	99.769	37.689	9.1512
1320	Male	58.16	RS1	155.94	106.59	28.759	26.165	100.1	24.716	124.27	63.232	48.4	62.256	59.814	46	114.22	43.211	7.9795	79.339	40.609	6.2986	94.015	37.53	56.53	98.772	13.591	10.685	97.49	33.749	0.64295
1321	Female	59.26	RS1	151.55	107.55	24.886	22.747	106.16	24.432	116.94	65.674	33.2	55.908	64.209	34	107.57	50.004	4.2957	67.945	48.657	4.4609	88.021	35.048	36.36	87.598	25.427	1.8997	87.547	43.572	1.9628
1322	Female	59.19	RS1	154.92	110.08	33.295	33.386	109.33	33.142	126.71	67.139	50	61.768	70.557	50	110.93	50.398	12.111	76.677	50.094	12.967	94.421	43.163	54.39	93.975	29.604	15.022	93.244	43.641	6.6676
1323	Male	58.18	RS1	147.98	93.548	38.565	20.207	101.82	43.936	112.55	63.232	66.8	51.514	66.65	70	96.265	37.626	27.755	59.896	40.053	28.676	81.198	43.632	80.151	76.481	15.252	37.161	76.134	28.829	22.946
1324	Male	57.78	RS1	157.22	103.61	34.76	24.023	106.42	29.311	122.31	56.396	54	56.885	56.885	50	112.71	36.579	13.746	69.491	36.991	13.115	88.541	34.715	62.168	91.416	9.3222	21.315	92.209	28.218	7.9256
1325	Female	59.35	RS1	148.55	110.52	27.011	30.347	103.37	23.809	122.8	65.674	38.8	62.744	61.768	37.2	110.83	49.049	5.21	77.407	46.659	5.134	95.066	39.867	43.666	96.476	28.407	4.6528	95.33	40.96	1.426
1326	Female	59.14	RS1	145.81	100.82	34.644	24.029	102	36.652	114.01	60.303	47.6	55.42	60.791	49.2	101.02	46.091	6.7901	65.616	45.976	7.3007	84.838	37.4	52.715	81.714	24.384	6.9856	82.971	41.032	0.23931
1327	Female	57.59	RS1	155.2	95.668	45.616	30.464	97.257	42.504	124.76	52.978	63.6	61.279	53.467	61.2	110.74	32.148	23.933	74.147	33.644	22.883	92.967	34.122	65.153	91.393	11.78	30.622	91.523	26.454	17.99
1328	Male	58.7	RS1	161.02	109.23	30.672	24.653	104.57	25.657	124.76	62.256	45.2	62.744	59.814	42.8	113.28	47.818	5.6613	78.799	45.831	4.9139	93.776	37.178	47.776	97.044	20.897	8.6304	96.583	39.298	1.5405
1329	Male	59.04	RS1	151.56	101.64	34.551	20.674	99.26	32.4	119.38	55.908	57.2	51.025	52.978	56.4	107.83	34.729	20.458	66.178	34.103	19.044	86.661	30.581	68.865	86.545	5.59	25.115	85.946	24.75	11.463
1330	Female	57.73	RS1	148.72	109.1	24.076	21.017	115.74	26.413	113.53	68.603	36.4	50.537	72.51	39.6	101.06	56.579	4.1342	60.17	59.05	4.3053	81.849	42.559	38.575	80.884	37.751	3.4376	80.343	52.494	1.834
1331	Male	57.91	RS1	157.32	105.94	33.438	20.078	107.35	26.987	117.43	63.232	45.2	55.908	64.209	42	107.66	40.364	5.7746	68.692	40.646	5.0713	86.938	36.162	48.507	86.975	15.829	7.371	87.542	31.947	1.2067
1332	Female	58.03	RS1	154.14	119.74	35.395	38.871	109.19	36.276	130.62	78.369	54	70.068	73.486	54	119.06	61.806	17.569	88.68	57.993	16.756	102.26	55.239	58.664	106.93	39.096	21.283	105.79	53.611	11.366
1333	Male	59.28	RS1	155.09	100.37	40.232	23.414	98.554	37.931	123.29	56.396	60.4	59.814	56.885	58.8	113.31	33.038	21.077	72.208	32.326	19.808	92.015	31.607	68.046	92.438	6.45	25.386	93.16	24.044	13.729
1334	Female	59.13	RS1	148.58	106.13	35.846	25.541	105.65	34.792	117.92	64.697	49.2	55.42	65.674	49.2	102.81	46.541	8.2811	71.797	46.237	8.2	86.955	42.612	49.557	86.961	26.004	10.554	86.925	40.695	2.726
1335	Male	58.13	RS1	159.98	106.26	38.12	22.793	98.499	36.748	128.66	58.838	63.6	58.838	56.396	61.2	113.94	35.615	18.074	74.841	34.096	17.793	94.371	32.282	70.268	93.746	6.7886	25.269	93.466	25.376	13.187
1336	Male	59.21	RS1	152.23	94.482	26.138	20.382	96.994	21.617	118.41	47.607	43.6	53.955	47.607	41.2	108.03	30.616	7.7992	67.073	29.7	6.7303	86.311	22.699	51.148	89.231	3.9148	8.6309	88.072	22.494	0.40842
1337	Female	57.85	RS1	152.03	99.142	38.115	28.469	104.64	29.912	116.94	66.65	50.8	58.35	69.58	47.6	105.97	44.684	12.5	70.1	46.145	9.8456	86.445	40.537	56.101	86.123	20.136	15.43	87.21	37.276	4.6758
1338	Female	58.02	RS1	159.27	104.35	42.592	28.219	94.324	40.751	130.62	62.744	63.6	64.209	58.35	63.6	117.65	37.558	25.976	81.059	35.391	26.513	99.552	37.596	70.579	100.69	16.678	33.229	99.813	28.926	21.188
1339	Female	59.4	RS1	154.15	107.52	41.373	29.734	109.36	36.746	125.73	66.65	61.2	57.373	67.139	58.8	112.52	44.515	22.839	72.01	43.824	21.074	91.13	43.666	67.885	93.086	23.712	29.657	92.353	37.187	17.221
1340	Male	59.07	RS1	157.69	112.47	27.358	22.327	103.68	28.417	126.71	67.139	47.6	59.814	63.232	47.6	111.07	47.726	6.2521	73.473	46.069	5.9927	94.118	42.395	54.754	93.01	19.14	10.337	92.061	37.96	0.91452
1341	Male	58.31	RS1	155.75	105	34.44	21.404	101.75	33.615	127.69	60.791	57.2	52.49	56.885	58	110.21	35.672	16.105	70.972	34.813	15.758	89.928	34.904	68.292	90.601	5.4451	20.341	91.212	25.596	7.5048
1342	Male	58.42	RS1	165.72	105.43	34.076	26.597	94.945	25.648	134.52	58.35	52.4	65.674	53.955	47.6	122.96	40.372	12.809	83.517	36.106	11.172	101.09	34.569	56.105	105.98	11.186	16.933	103.81	29.511	6.347
1343	Male	59.13	RS1	152.42	102.06	31.955	22.066	97.273	41.781	120.85	61.768	65.2	56.885	58.838	70	104.38	32.783	26.346	67.469	31.434	28.613	89.478	36.25	76.552	88.055	7.2186	38.134	86.118	20.726	22.955
1344	Female	58.44	RS1	155.61	108.3	22.684	24.733	119.03	15.143	118.9	67.627	30.8	54.932	71.045	26.8	109.05	58.093	3.2521	70.297	61.936	3.4683	86.228	43.838	27.374	88.199	39.41	-0.45972	89.779	57.841	2.0583
1345	Female	59.19	RS1	147.92	100.86	42.275	22.724	103.35	39.664	117.43	63.721	62	52.49	64.697	62.8	106.31	38.179	28.289	67.07	38.279	28.536	85.839	37.634	67.555	87.221	15.265	34.82	86.702	31.284	22.846
1346	Male	58.46	RS1	155.08	115.35	29.118	20.691	111.58	32.14	122.31	70.557	49.2	55.908	70.557	50	107.07	49.409	8.4089	69.123	47.827	9.6378	88.74	42.054	52.802	87.608	23.605	13.859	87.709	42.067	4.9761
1347	Female	57.77	RS1	157.2	102.24	42.257	34.456	105.66	34.738	124.76	60.791	60.4	61.768	64.697	57.2	111.92	43.848	22.327	78.492	44.779	19.826	92.572	42.713	64.46	95.482	23.157	24.782	95.268	38.177	14.874
1348	Male	58.95	RS1	152.51	94.041	38.341	19.735	100.14	34.142	114.99	59.814	67.6	50.537	64.209	66.8	100.22	25.902	26.121	63.144	28.109	25.016	81.971	34.03	81.762	78.535	2.984	35.065	79.372	17.187	19.115
1349	Male	58.83	RS1	161.73	110.91	32.615	17.625	99.292	27.974	129.15	55.908	51.6	54.443	49.561	48.4	116.13	39.381	8.0595	76.194	35.866	6.4334	94.128	30.913	58.168	98.206	13.958	8.0267	97.482	31.22	0.51242
1350	Male	57.91	RS1	155.28	91.309	36.22	19.705	91.642	36.631	122.31	45.166	56.4	52.002	46.631	57.2	104.39	28.147	16.756	64.371	28.88	16.809	85.608	24.47	65.893	86.375	1.9828	24.178	84.555	18.975	11.824
1351	Male	57.87	RS1	152.68	111.98	36.296	24.91	97.939	39.677	126.71	68.603	64.4	61.279	60.791	66.8	118.17	41.34	29.228	77.494	36.286	29.114	96.271	44.897	76.19	100.78	16.019	36.339	99.173	29.075	23.752
1352	Female	57.35	RS1	145.56	100.63	30.137	31.313	105.95	25.222	116.94	63.232	40.4	55.908	65.674	37.2	102.55	46.97	7.5543	70.978	48.48	6.85	85.563	39.633	38.142	84.248	26.263	7.6815	86.542	41.947	4.8207
1353	Female	58.84	RS1	151.89	108.01	39.199	22.226	115.19	33.56	113.53	73.486	56.4	52.49	77.393	51.6	102.7	51.97	13.995	65.643	53.031	11.93	80.899	50.246	60.546	83.598	28.621	17.874	84.465	45.088	6.9277
1354	Female	57.98	RS1	149.12	109.36	37.681	21.994	108.36	36.856	116.94	64.209	56.4	52.49	63.232	56.4	102.58	46.643	13.76	66.866	45.209	12.584	85.131	45.197	62.435	85.753	22.59	17.225	84.457	38.896	6.3365
1355	Female	57.85	RS1	154.27	99.86	27.156	29.756	101.41	29.636	117.92	66.65	42	63.232	64.697	45.2	109.51	44.778	4.9451	74.7	46.641	3.4417	91.414	36.942	42.788	91.614	26.548	6.4874	92.017	40.635	-1.5297
1356	Male	58.45	RS1	159.72	103.88	30.623	18.716	102.34	24.739	123.29	60.791	53.2	52.002	60.303	50.8	113.05	39.063	6.4611	70.835	37.893	5.6575	88.633	35.32	57.599	95.817	10.574	9.2224	93.317	30.89	0.2008
1357	Female	58.92	RS1	152.56	100.24	48.194	24.631	100.62	41.687	116.46	61.279	71.6	53.955	62.744	69.2	103.96	37.228	36.549	69.518	39.462	35.709	83.252	42.783	79.624	83.373	15.325	42.304	86.412	29.429	30.873
1358	Female	59.26	RS1	150.77	109.83	43.096	29.299	93.957	35.576	123.29	65.674	56.4	63.232	57.861	53.2	114.55	41.139	22.716	79.869	36.539	20.043	96.386	36.699	60.878	101.44	18.402	26.291	98.545	31.9	14.799
1359	Female	57.68	RS1	153.14	96.558	36.236	27.151	99.267	32.36	120.85	59.326	54	56.885	61.279	52.4	105.7	38.816	14.64	72.748	39.384	14.215	88.462	36.6	59.56	89.628	16.581	19.734	89.459	31.689	8.7836
1360	Female	58.01	RS1	148.97	107.14	31.585	24.34	102.53	30.86	116.94	62.744	45.2	57.861	60.303	45.2	104.65	46.642	4.2818	68.24	45.566	5.1462	88.19	36.802	49.067	88.351	21.301	6.9694	87.396	39.019	-0.29513
1361	Female	58.85	RS1	155.99	105.62	24.932	22.907	100.99	30.99	120.36	64.209	35.6	61.279	60.791	37.2	108.73	47.442	9.3308	69.366	45.992	9.378	92.713	37.145	38.027	90.494	22.857	7.12	89.334	41.222	6.958
1362	Female	57.21	RS1	151.86	100.54	23.021	30.696	93.993	33.385	125.24	63.232	45.2	67.627	60.791	50	108.5	43.621	6.3495	78.136	41.631	6.698	97.649	39.828	52.133	97.953	17.218	8.5525	94.06	34.225	1.792
1363	Male	57.39	RS1	158.42	100.67	22.467	25.465	102.65	20.813	126.22	49.072	27.6	60.303	50.049	26.8	110.57	43.742	3.0196	75.474	44.889	1.6596	92.033	24.453	30.491	94.088	21.282	0.5258	94.25	40.408	0.20265
1364	Female	58.44	RS1	156.82	112.49	28.6	28.972	102.19	31.477	131.1	68.603	42.8	66.162	62.256	44.4	116.98	50.651	6.2472	77.805	46.637	6.7226	101.45	42.243	45.644	99.434	25.023	8.4138	97.416	42.672	-0.35117
1365	Female	58.32	RS1	146.84	86.359	32.932	26.112	107.54	25.173	110.11	59.814	50	49.072	69.092	46.8	94.723	38.737	8.5021	60.983	44.416	6.0117	75.81	36.754	50.477	75.083	16.262	10.68	76.576	33.675	2.4355
1366	Male	58.84	RS1	155.76	107.08	32.532	21.729	105.3	32.062	120.36	61.279	47.6	53.955	62.256	49.2	105.78	40.862	10.432	65.594	41.103	11.658	87.633	38.052	60.589	86.593	16.393	14.716	86.276	33.705	4.788
1367	Female	57.79	RS1	152.79	107.54	38.005	27.765	99.395	35.369	123.29	69.58	55.6	60.791	65.186	54.8	112.84	47.037	17.553	74.553	43.748	17.268	92.655	41.803	60.959	94.177	20.855	20.071	94.247	37.961	9.6253
1368	Female	58.31	RS1	156.73	106.07	29.897	35.663	104.3	23.235	127.69	63.721	46	63.721	62.744	42	115.71	47.941	4.9524	83.482	47.109	3.63	95.659	40.108	48.2	100.74	25.483	5.2258	100.53	41.106	-2.2865
1369	Male	59.01	RS1	155.19	105.1	41.701	15.193	104.83	47.754	119.38	64.697	67.6	50.049	62.744	70	104.2	39.908	30.828	62.026	38.865	33.261	85.116	42.844	78.248	83.504	14.078	38.732	82.266	31.006	25.444
1370	Female	58.96	RS1	153.36	112.4	34.642	25.608	100.73	42.811	124.76	73.975	66	63.721	67.627	70	112.25	45.573	31.332	81.351	42.642	32.536	96.756	46.315	76.406	96.436	20.697	39.717	95.511	37.381	27.33
1371	Female	58.68	RS1	155.22	101.37	49.528	22.919	96.938	39.259	120.36	64.209	69.2	55.42	63.232	65.2	109.03	36.799	31.788	72.254	37.516	28.24	89.142	37.395	71.696	89.24	13.022	35.782	89.713	30.217	25.428
1372	Male	57.41	RS1	161.52	86.888	33.958	20.705	86.994	31.062	123.78	47.607	59.6	55.42	48.096	59.6	111.29	23.838	21.323	69.065	22.408	20.087	88.898	24.056	72.882	89.765	2.7203	28.267	89.227	14.099	13.954
1373	Female	58.01	RS1	154.28	126.4	22.069	33.93	117.51	23.902	127.2	86.182	37.2	65.674	81.787	38	115.2	70.537	6.1306	78.08	67.626	6.7528	97.52	59.928	40.735	99.295	48.753	6.5528	97.652	63.781	3.361
1374	Male	58.67	RS1	158.87	103.16	39.744	23.409	95.166	29.704	124.76	58.838	58	57.373	54.932	52.4	112.21	36.094	18.412	75.417	34.216	14.976	91.517	31.522	65.395	94.815	6.1237	20.745	94.142	25.509	8.7579
1375	Male	58.63	RS1	156.56	100.19	28.987	24.806	95.284	30.563	126.22	55.908	43.6	63.721	51.025	45.2	114.36	37.016	5.3135	75.677	34.84	5.4556	97.526	29.138	55.073	95.068	5.5815	8.4813	96.082	27.08	1.7891
1376	Male	57.72	RS1	156.21	89.163	38.916	17.441	99.976	35.964	117.43	59.814	67.6	52.49	63.232	65.2	99.661	33.367	29.647	66.893	36.099	28.209	84.357	44.305	79.328	82.166	6.9774	40.658	81.451	23.866	24.063
1377	Female	58.71	RS1	149.46	113.11	37.061	26.741	114.67	36.693	117.43	75.928	56.4	58.35	76.416	56.4	104.11	55.812	16.486	72.334	55.222	16.453	87.784	51.156	57.033	88.427	36.054	19.698	88.946	50.755	10.75
1378	Male	59.06	RS1	156.54	102.67	38.175	24.256	89.516	32.059	125.73	62.744	59.6	61.768	55.42	58	116.83	39.959	18.246	77.024	35.458	16.501	95.811	36.123	68.869	99.001	10.959	22.254	98.416	28.792	10.177
1379	Female	57.79	RS1	146.84	108.14	31.004	28.897	114.68	31.836	113.53	65.186	40.4	56.885	67.139	40.4	104.39	53.603	4.0094	65.317	56.326	3.1862	84.702	42.136	41.481	83.775	34.854	4.5986	84.985	49.85	0.49094
1380	Male	58.94	RS1	154.52	108.86	19.971	20.462	112.95	25.746	120.36	64.697	38.8	55.42	65.674	41.2	105.49	44.354	5.1931	68.938	44.446	4.9724	88.457	40.379	44.301	88.46	19.506	6.9189	87.966	36.525	2.139
1381	Male	58.63	RS1	160.67	106.7	34.61	26.621	104.3	27.512	125.24	65.674	46	61.768	62.744	41.2	117.01	45.822	7.1274	77.449	43.785	6.4158	95.139	42.3	46.331	97.944	19.31	7.8925	97.705	36.965	4.36
1382	Male	58.79	RS1	156.18	95.3	36.834	32.288	98.15	29.718	122.8	56.885	60.4	61.279	58.838	57.2	113.89	33.393	20.378	78.167	34.291	19.186	92.466	33.924	66.498	96.846	10.901	26.426	97.257	24.173	14.497
1383	Male	57.3	RS1	162.42	104.67	38.026	25.514	89.511	41.654	131.1	61.279	62	67.139	54.932	64.4	122.22	31.141	28.464	80.863	24.62	29.378	102.4	32.967	74.017	104.89	4.3785	36.402	102.28	18.365	23.296
1384	Female	57.58	RS1	158.34	118.58	29.587	36.407	112.93	14.116	127.2	75.439	37.2	70.557	71.045	29.2	118.66	63.571	6.3006	86.835	59.988	5.1638	99.472	45.25	36.799	102.59	37.317	5.9058	103.77	56.291	4.7249
1385	Female	57.84	RS1	151.35	102.1	33.036	22.04	106.09	40.187	117.43	54.443	46.8	56.885	57.373	49.2	99.533	41	7.5016	67.204	41.913	8.5263	85.927	34.482	49.593	83.326	20.065	9.8262	83.183	36.483	2.7082
1386	Female	58.33	RS1	154.12	103.67	33.033	27.147	100.92	27.804	121.83	65.186	54.8	56.885	64.209	54	107.71	40.109	18.285	76.01	38.716	16.461	90.812	36.689	62.86	92.496	17.666	24.658	92.11	33.355	14.133
1387	Female	57.85	RS1	148.35	95.324	37.564	26.163	101.17	35.455	115.48	59.326	59.6	54.443	63.232	58.8	103.41	39.774	25.046	68.639	40.435	24.366	84.939	41.258	68.037	86.491	15.256	33.002	86.256	30.775	19.646
1388	Female	57.38	RS1	150.2	100.55	32.372	28.716	102.93	31.28	119.38	59.326	47.6	56.885	60.303	46.8	104.21	40.937	7.9167	70.749	42.711	8.8122	87.704	37.212	55.163	85.838	16.637	12.62	87.184	34.922	2.7716
1389	Female	57.51	RS1	150.51	117.91	31.568	26.429	109.73	31.861	122.8	70.068	43.6	59.326	66.65	43.6	109.05	53.237	5.5953	73.834	51.907	5.8395	92.783	43.877	46.956	93.68	30.931	6.2621	93.009	47.341	1.2873
1390	Female	58.61	RS1	147.77	97.833	34.568	25.673	110.03	28.72	111.57	57.861	46.8	52.49	63.232	46	101.41	43.33	6.4422	65.412	44.961	5.5473	79.997	33.966	50.447	83.433	17.766	7.0088	84.444	36.871	-0.11599
1391	Female	58.25	RS1	151.67	116.64	26.456	28.33	102.98	29.6	121.34	71.533	29.2	60.791	65.186	30.8	113.15	61.027	0.67596	70.6	56.321	1.709	93.969	45.083	30.097	94.952	39.698	-2.7353	93.081	58.056	-0.072581
1392	Female	58.58	RS1	153.52	108.66	32.035	29.908	108.55	29.708	121.83	68.115	41.2	60.303	66.65	41.2	109.31	52.772	6.1944	75.346	50.87	5.8164	91.971	42.732	46.582	93.885	29.493	7.3759	92.882	45.335	1.6032
1393	Female	57.43	RS1	152.5	101.75	39.338	24.16	111.1	36.841	113.53	67.627	61.2	54.443	72.51	60.4	99.124	47.067	25.105	67.173	49.492	24.587	82.499	49.936	65.772	81.612	31.491	30.842	82.783	44.47	20.572
1394	Female	58.47	RS1	153.79	111.81	35.852	30.875	107.7	28.13	123.29	71.533	50	63.232	70.557	45.2	115.16	55.825	9.2295	80.017	54.732	6.994	93.446	44.788	52.331	97.74	30.21	8.6905	98.443	49.11	2.9876
1395	Female	57.46	RS1	156.37	122.3	38.15	31.216	107.47	29.364	129.15	73.975	50	69.092	66.65	46.8	122.81	59.063	9.2795	85.214	53.453	7.9697	101.12	48.049	53.89	105.84	34.436	11.711	104.38	51.382	2.4975
1396	Female	58.13	RS1	153.81	98.796	37.19	25.561	97.272	27.394	119.38	56.885	46.8	59.814	55.908	42.8	110.38	43.344	8.7077	75.65	41.357	6.5929	89.935	34.668	52.74	94.16	18.702	8.238	94.055	36.02	1.453
1397	Female	57.54	RS1	152.58	102.6	32.494	27.493	109.73	26.766	117.92	61.279	45.2	56.885	64.697	42.8	105.32	45.045	5.5643	69.872	46.288	6.2064	85.573	36.145	46.927	86.249	21.984	5.7972	87.355	40.145	0.85006
1398	Female	58.44	RS1	150.27	117.66	32.052	24.136	113.85	27.743	115.48	78.857	41.2	58.838	77.881	39.6	105.22	64.077	5.9701	71.918	63.599	6.5525	87.457	56.142	43.219	91.581	40.456	6.1276	89.774	55.954	3.4725
1399	Male	57.38	RS1	151.46	93.54	29.565	26.884	90.148	28.91	121.34	45.654	44.4	56.885	45.166	44.4	108.2	29.085	5.1063	70.4	29.107	4.8775	89.285	22.25	49.377	90.957	3.5691	7.7955	89.304	21.253	1.3857
1400	Male	57.45	RS1	155.92	105.29	39.907	26.308	101.53	42.123	125.24	69.092	65.2	60.791	66.65	68.4	110.48	41.063	26.725	74.304	42.434	28.082	94.502	42.967	76.739	93.458	14.6	35.146	91.685	31.676	22.435
1401	Female	58.84	RS1	152.09	110.79	21.865	21.168	108.33	21.634	117.43	64.209	38.8	53.955	63.721	40.4	102.82	55.373	-1.9766	66.565	52.968	-0.39011	85.591	37.862	42.529	84.162	29.971	1.1684	85.16	49.847	-6.3616
1402	Male	57.4	RS1	153.64	111.13	30.957	23.497	98.898	28.881	122.31	66.162	49.2	62.256	60.791	47.6	112.02	47.387	9.9942	79.016	42.219	8.2523	94.096	40.417	55.697	99.653	21.334	12.366	97.864	37.364	3.8655
1403	Male	56.92	RS1	152.32	104.38	39.689	23.417	98.196	42.093	121.83	66.162	65.2	57.861	64.209	66.8	109.39	33.442	30.864	70.544	31.577	29.254	91.146	39.707	77.496	92.9	10.288	42.682	90.529	22.695	27.856
1404	Male	58.07	RS1	153.57	102.95	42.108	21.975	97.903	39.896	119.87	59.814	66	57.861	58.838	65.2	109.03	35.641	31.015	69.493	35.216	31.246	89.464	37.205	76.901	88.551	9.1845	39.8	88.275	26.142	26.609
1405	Female	56.95	RS1	152.96	114.32	31.635	28.995	107.2	30.173	123.78	73.486	43.6	64.697	69.092	42.8	111.26	56.315	5.4093	78.35	54.158	5.3864	95.269	46.3	47.56	96.709	29.891	7.6528	95.94	48.141	-0.19183
1406	Female	57.1	RS1	151.25	102.88	32.243	26.294	99.623	28.658	120.85	60.791	46.8	58.838	57.861	46	109.21	40.087	8.497	73.774	38.361	7.3006	91.542	36.132	51.483	92.762	14.146	11.208	91.352	32.022	1.6191
1407	Male	57.7	RS1	154.97	103.49	22.373	27.151	97.051	26.271	125.73	57.373	41.2	60.303	53.955	43.6	112.76	38.744	4.8403	77.245	35.89	5.7474	95.183	29.412	51.622	98.591	11.525	7.6283	96.378	30.332	-0.38987
1408	Male	58.74	RS1	154.41	97.896	25.432	20.377	99.957	29.926	119.38	52.978	42	55.908	53.955	44.4	105.86	35.726	3.1051	66.38	34.28	3.8378	86.998	26.046	47.977	86.106	7.2391	6.7605	85.702	26.512	-1.0486
1409	Male	57.64	RS1	153.57	100.4	40.309	21.898	101.72	37.548	120.85	62.256	66	54.443	61.768	65.2	106.75	39.406	30.7	68.579	38.254	29.998	86.795	44.502	77.533	88.814	12.621	40.29	88.199	29.119	25.629
1410	Female	57.66	RS1	157.24	106.65	37.525	37.677	99.087	41.114	131.1	67.139	54	70.068	62.744	54.8	117.16	45.466	16.063	82.917	43.093	16.553	101.7	41.064	56.974	101.71	25.628	19.46	100.1	38.856	10.41
1411	Male	58.88	RS1	157.75	96.842	37.884	21.316	97.473	35.906	121.34	56.885	57.2	59.814	54.932	58.8	110.25	30.472	16.463	72.781	31.191	17.136	91.151	29.616	66.647	90.475	2.7895	19.493	91.302	21.854	8.9535
1412	Female	58.05	RS1	153.37	110.45	27.566	27.647	108.35	28.907	124.76	68.603	47.6	61.279	66.65	48.4	110.35	46.059	9.3281	75.006	44.46	9.4252	93.984	43.781	54.635	94.579	21.298	13.538	93.107	37.214	3.5721
1413	Male	58.76	RS1	159.57	94.855	25.413	22.176	100.27	26.024	126.71	47.607	42.8	55.908	51.025	42.8	109.38	31.421	4.9639	69.763	34.038	4.9361	91.674	24.486	48.522	88.307	6.1951	6.5491	89.107	25.297	0.28216
1414	Female	58.01	RS1	154.21	112.79	34.216	37.134	106.08	35.194	127.69	68.603	49.2	67.139	67.139	50	115.77	52.919	9.5002	81.705	51.148	9.995	98.027	42.12	55.236	99.267	29.819	12.447	99.225	44.882	3.4478
1415	Female	57.05	RS1	156.07	108.75	38.975	31.414	112.4	31.822	124.76	66.65	47.6	56.885	69.58	43.6	108.68	49.539	10.963	74.884	51.48	10.496	89.715	43.112	51.343	89.373	28.067	15.355	91.185	44.694	6.7164
1416	Female	57.85	RS1	146.49	99.063	31.601	24.965	105.31	33.62	114.5	63.232	47.6	52.49	66.162	49.2	99.027	42.757	6.1928	62.826	45.396	7.5906	82.162	39.295	54.978	78.708	22.107	8.7275	79.378	38.432	-0.45186
1417	Female	58.56	RS1	151.65	111.91	27.737	26.612	102.96	35.181	125.73	68.603	48.4	63.232	63.721	52.4	108.68	49.998	9.9073	74.711	47.039	11.887	98.007	44.952	56.683	93.465	27.04	14.359	90.845	43.09	5.2658
1418	Female	58.36	RS1	152.34	116.27	25.446	27.905	103.15	29.821	123.78	70.557	46	63.232	64.209	48.4	111.79	50.008	10.014	75.396	45.937	9.738	95.055	45.539	50.016	96.039	28.301	11.478	94.239	42.524	3.6855
1419	Female	57.23	RS1	154.26	111.35	30.054	34.921	99.232	34.459	128.66	72.998	47.6	71.533	67.627	49.2	118.68	54.905	10.142	83.688	50.657	13.657	102.64	45.714	52.801	103.74	31.646	15.394	100.65	45.658	5.8934
1420	Female	57.73	RS1	155.5	118.93	33.769	28.481	111.89	30.695	123.78	79.346	43.6	66.162	74.951	42.8	114.51	63.572	3.5771	78.632	60.053	5.2116	96.395	51.047	45.388	97.866	38.175	5.3934	97.664	55.014	-1.1577
1421	Female	57.36	RS1	148.89	91.898	31.937	27.156	108.22	25.808	111.57	59.326	43.6	53.467	65.674	40.4	101.44	49.422	6.0791	67.201	53.035	5.7415	79.185	36.646	45.116	80.521	30.605	5.2969	84.81	45.893	3.0442
1422	Female	58.39	RS1	158.59	105.44	33.1	25.287	94.3	33.377	127.2	62.744	57.2	64.697	57.373	57.2	118.06	38.312	20.377	79.201	35.099	20.212	98.046	37.149	68.545	100.88	14.235	28.193	98.896	28.825	14.768
1423	Male	58.21	RS1	159.37	109.87	40.754	25.19	95.967	38.604	128.17	65.674	61.2	67.139	59.326	61.2	119.11	41.936	24.071	83.177	36.548	23.342	100.76	41.894	72.307	106.46	14.233	33.43	104.06	29.961	19.723
1424	Male	57.91	RS1	160.87	105.12	27.703	25.079	104.43	25.928	127.2	55.908	38	60.791	55.42	37.2	113.74	38.634	5.0648	76.615	38.74	5.2106	95.115	28.699	42.745	95.985	9.7663	6.0006	96.85	31.193	2.3933
1425	Female	57.36	RS1	153.04	116.03	25.703	22.5	113.41	25.566	119.38	71.533	38	55.908	69.58	38	107.38	53.34	3.3279	69.872	53.296	2.9028	88.327	45.237	40.2	89.813	30.297	5.1334	89.593	46.41	0.30054
1426	Male	57.89	RS1	152.95	99.151	30.055	23.313	99.471	32.728	120.36	56.885	46	58.35	55.908	48.4	107.74	34.142	10.346	70.289	32.937	11.14	89.633	31.893	52.73	90.466	10.137	14.786	89.39	25.444	5.4677
1427	Female	58.6	RS1	149.7	120.53	34.498	30.67	115.23	26.9	118.9	80.811	46	63.232	77.881	43.6	111.79	65.942	5.3959	77.371	63.208	3.8494	91.501	57.141	46.817	96.858	43.637	4.2501	96.348	59.651	-2.132
1428	Male	58.6	RS1	165.16	107.3	35.142	26.789	97.333	22.509	131.59	62.744	58	62.744	58.35	52.4	124.7	39.078	13.995	82.649	35	10.889	98.061	32.981	59.33	104	9.8669	16.948	104.88	28.557	5.5443
1429	Male	57.22	RS1	154.94	98.792	25.478	23.812	93.888	31.815	121.34	56.396	46.8	61.279	54.443	51.6	105.37	32.793	8.5012	70.271	32.023	11.899	91.302	29.086	55.256	88.059	5.0663	13.283	86.931	23.129	3.3422
1430	Male	57.28	RS1	148.13	94.834	29.415	17.576	94.859	34.986	116.94	49.072	50.8	50.537	48.096	54	104.91	28.454	17.469	60.465	27.556	19.869	85.807	29.14	60.198	84.649	4.4494	25.771	82.268	20.292	12.696
1431	Female	57.2	RS1	144.86	108.98	34.469	25.626	107.59	39.171	114.01	70.557	48.4	58.838	70.068	52.4	100.14	54.102	8.5356	67.933	53.234	10.247	86.196	47.205	52.658	84.194	33.181	11.706	83.971	47.744	3.4203
1432	Female	58.15	RS1	152.32	106.61	26.708	33.53	102.98	27.574	123.29	65.674	42.8	62.744	64.209	43.6	108.62	53.642	6.8949	78.937	52.744	5.8353	93.726	43.845	46.568	92.494	31.23	6.4	93.757	47.818	0.40703
1433	Female	57.45	RS1	150.86	105.65	33.561	29.332	100.63	36.801	123.29	62.256	48.4	62.744	61.279	49.2	105.66	48.734	10.958	76.426	46.965	9.9791	94.084	39.427	57.451	93.628	26.399	13.116	91.79	43.443	3.8242
1434	Female	56.96	RS1	155.91	110.38	31.326	27.15	104.6	34.293	125.24	67.627	54	62.256	65.674	54.8	110.63	46.414	11.852	74.674	44.689	12.809	95.124	42.611	60.331	93.36	24.29	17.942	92.202	38.37	7.4476
1435	Female	57.19	RS1	144.46	107.89	33.699	25.027	113.43	26.024	110.6	69.092	45.2	52.49	71.045	41.2	96.865	54.504	5.6803	67.859	56.127	4.7818	80.136	44.792	47.814	80.968	35.791	5.8011	82.362	50.251	-0.45291
1436	Female	58.29	RS1	152.59	97.863	37.554	23.673	87.576	47.443	125.24	58.838	65.2	59.326	55.42	70	108.92	34.718	26.864	74.712	31.962	29.613	94.85	31.884	75.476	94	9.4691	34.439	91.361	25.803	23.694
1437	Male	58.41	RS1	156.94	104.15	26.187	25.207	91.963	31.429	126.22	52.978	45.2	62.256	47.607	47.6	114.53	34.638	6.0341	75.664	30.823	5.2526	95.119	27.704	53.007	97.955	7.9012	6.7073	96.096	25.226	1.2026
1438	Female	56.52	RS1	147.87	102.51	21.764	27.708	105.16	17.66	115.97	63.232	31.6	57.861	63.232	30	106.3	53.313	3.4826	70.33	52.944	3.7613	86.573	40.011	30.237	87.104	36.963	1.9608	87.927	51.508	2.0093
1439	Male	56.7	RS1	149.56	108.64	18.139	19.204	113.58	33.514	115.97	61.279	34.8	49.561	64.209	45.2	96.752	51.749	5.0033	57.234	53.463	4.5729	81.781	36.175	37.942	77.131	28.512	3.8638	75.907	48.021	1.8396
1440	Male	56.58	RS1	153.35	102.04	35.566	25.707	106.55	33.7	118.9	61.279	63.6	54.443	64.209	62	103.38	39.304	25.325	66.567	41.549	22.107	85.295	40.332	73.233	83.335	16.4	33.084	82.995	32.246	20.221
1441	Male	57.44	RS1	157.05	96.74	34.64	22.487	93.089	33.149	122.31	53.467	54.8	58.838	52.49	54.8	113.8	29.85	20.86	70.944	27.792	20.095	91.765	29.998	66.209	93.488	3.9599	26.624	93.531	19.898	13.097
1442	Female	57.71	RS1	158.65	107.98	33.342	26.254	97.232	31.732	126.71	63.721	48.4	61.768	59.326	47.6	114.26	43.135	12.043	77.984	39.903	11.374	95.273	40.016	54.115	97.151	22.029	17.918	96.688	35.341	7.0388
1443	Male	57.42	RS1	156.77	97.416	28.802	19.703	97.815	32.01	124.76	54.932	50	52.49	56.396	53.2	110.55	30.398	9.8586	66.688	31.25	12.264	90.15	33.637	64.096	88.272	2.4288	20.726	88.235	20.973	6.0986
1444	Female	56.58	RS1	154.01	99.256	45.516	33.635	98.413	32.935	124.76	62.744	60.4	63.721	62.744	53.2	114.47	45.338	15.244	80.304	45.125	11.498	93.387	41.79	60.802	95.458	21.521	16.99	97.064	38.475	7.422
1445	Male	58.39	RS1	155.57	109.82	32.546	24.885	106.95	35.129	125.73	64.209	54.8	57.861	63.721	56.4	111.34	49.183	11.729	73.672	47.221	10.843	93.193	42.126	63.554	93.688	21.813	16.462	92.576	39.926	5.4246
1446	Female	57.73	RS1	152.1	110.28	22.027	22.73	115.39	20.767	117.43	65.186	34.8	49.561	69.092	33.2	102.93	55.992	4.7647	62.673	56.43	2.9769	81.925	40.99	32.369	80.235	34.536	1.0519	82.785	53.681	0.99051
1447	Female	58.34	RS1	152.84	105.25	31.967	26.196	106.22	25.858	119.87	65.186	50	57.861	64.697	46.8	109.27	46.334	6.0046	72.641	45.873	5.3044	88.405	41.058	51.127	91.848	22.299	8.2457	92.054	38.721	-0.26304
1448	Male	57.69	RS1	159.5	104.16	33.918	28.765	95.786	31.939	128.17	55.908	42	65.674	51.514	41.2	116.61	42.55	5.9044	81.145	39.584	5.2	98.547	29.922	46.894	100.05	15.874	5.3255	99.371	34.233	0.52559
1449	Female	56.61	RS1	153.97	110.17	33.175	33.723	103.44	28.239	129.15	64.697	45.2	64.209	60.303	42.8	116.78	44.754	10.587	80.515	43.11	10.301	97.869	41.977	50.563	100.17	24.07	15.171	99.052	36.275	5.9872
1450	Female	57.73	RS1	150.69	104.55	33.763	23.079	92.15	40.8	122.31	60.791	58	57.861	53.955	62	109.3	28.686	19.697	73.491	24.216	22.533	92.874	35.117	68.371	95.134	3.8716	30.918	92.537	18.222	17.167
1451	Male	58.32	RS1	161.85	103.84	29.79	20.813	98.997	29.861	129.64	58.35	55.6	59.814	56.396	54.8	114.79	39.682	11.385	76.508	38.191	9.6246	96.188	34.87	62.756	97.505	14.101	11.832	96.668	31.84	3.4382
1452	Male	57.08	RS1	153.5	94.596	31.027	20.261	102.27	38.174	120.36	52.978	52.4	52.002	55.908	55.6	104.53	32.195	13.427	60.537	34.782	16.542	86.674	29.551	63.53	81.299	6.608	18.993	81.793	25.769	8.6339
1453	Female	57.97	RS1	156.01	116.93	23.157	29.339	120.29	22.109	123.29	76.904	33.2	61.768	77.393	33.2	112.49	62.998	3.5675	71.737	63.502	3.3921	92.484	50.719	35.309	92.8	44.558	4.3083	93.457	59.505	0.78252
1454	Female	56.98	RS1	151.31	101.43	25.692	24.163	94.154	29.341	121.83	57.861	45.2	61.768	54.932	47.6	111.22	37.519	9.0212	72.873	34.135	10.207	93.135	32.081	51.723	94.299	10.517	14.744	92.734	28.549	2.7198
1455	Female	56.95	RS1	150.25	104.69	31.068	22.655	107.5	30.624	114.99	59.814	48.4	56.885	60.791	48.4	103.55	39.416	9.9027	66.829	41.344	9.9381	85.633	36.05	51.983	84.601	18.026	15.225	84.216	34.158	5.0648
1456	Female	57.33	RS1	151.92	103.48	34.894	29.977	96.797	26.934	120.85	67.139	46.8	62.256	62.256	42.8	109.88	50.479	5.268	78.129	49.021	5.5357	92.208	38.724	48.728	94.562	24.129	6.6928	95.052	43.122	0.564
1457	Male	58.21	RS1	158.66	102.4	37.19	25.97	99.763	35.518	125.73	61.768	56.4	62.744	58.838	55.6	113.15	39.022	15.758	75.22	37.032	16.275	95.996	34.731	64.235	94.683	10.354	21.449	93.737	27.2	9.4949
1458	Female	57.26	RS1	150.57	102.7	34.724	24.606	103.54	34.32	116.94	64.697	52.4	58.35	64.697	54	103.51	42.72	12.492	68.539	42.681	11.518	87.808	34.678	57.848	88.885	18.113	13.924	87.315	36.381	4.6325
1459	Male	56.65	RS1	154.05	94.989	42.842	24.398	96.564	27.223	118.9	47.119	57.2	51.025	48.584	50.8	109.96	23.448	16.642	67.137	24.766	12.805	84.302	24.595	58.362	86.165	1.6455	21.416	88.668	15.131	7.847
1460	Female	58.25	RS1	157.71	106.44	41.134	33.401	101.07	27.533	125.73	62.744	60.4	62.256	60.791	54	116.07	40.387	24.633	82.663	38.1	20.767	94.344	40.786	64.855	99.592	18.864	30.803	100.21	31.519	18.106
1461	Female	58.05	RS1	142.98	108	35.124	22.808	113.4	38.429	111.08	73.486	58	51.514	74.951	60.4	96.557	49.893	23.134	67.078	49.929	23.437	80.886	53.434	67.448	82.378	27.951	29.349	81.707	41.117	16.974
1462	Male	57.42	RS1	162.33	95.742	46.819	22.592	104.44	38.6	121.34	55.42	74	54.443	61.279	69.2	110.21	27.702	29.686	67.987	29.328	24.398	85.489	31.086	82.183	89.996	4.3541	35.29	90.71	17.963	19.059
1463	Female	57.68	RS1	152.71	109.42	23.189	20.131	109.04	26.31	117.92	67.139	38	55.908	68.115	38	104.31	50.248	6.4106	67.488	50.535	5.4642	85.415	41.753	43.051	84.274	27.699	5.3422	85.363	43.621	2.1798
1464	Male	58.3	RS1	154.74	100.98	32.761	23.926	95.196	34.792	124.76	58.838	54	57.861	55.42	55.6	109.94	40.848	12.14	72.714	38.862	12.67	92.443	34.529	61.697	92.74	14.33	19.314	91.42	32.598	7.5865
1465	Female	58.3	RS1	152.04	103.09	35.139	31.489	95.187	37.027	125.73	63.232	54	63.232	59.814	54.8	111.33	45.667	15.879	78.23	42.42	16.743	95.836	40.663	62.496	96.867	19.544	22.19	95.264	35.823	11.168
1466	Male	57.81	RS1	161.42	91.1	37.813	23.667	86.891	33.924	124.76	43.701	55.6	58.838	42.236	54.8	116.32	21.916	15.247	70.53	21.494	14.566	92.653	17.121	65.161	90.742	1.2828	17.786	92.421	14.102	6.281
1467	Female	58.28	RS1	153.6	108.54	24.551	27.197	93.382	37.406	126.22	63.232	46.8	68.603	56.885	53.2	108.3	44.85	9.8808	77.502	41.999	12.9	99.391	41.541	57.299	94.366	20.36	16.126	92.616	36.741	7.2698
1468	Female	56.51	RS1	149.2	107.56	34.193	31.851	103.11	37.882	123.29	71.045	54.8	64.209	68.603	57.2	108.15	46.232	17.137	76.736	44.114	19.087	94.554	46.954	60.52	93.328	21.88	20.922	92.017	37.842	11.533
1469	Male	58.12	RS1	155.84	100.25	32.56	29.682	99.554	25.602	121.34	55.42	46	60.791	54.443	42.8	114.64	34.994	6.359	73.516	33.3	4.9563	90.437	31.382	51.855	94.357	7.2532	9.4162	94.634	24.72	0.78806
1470	Female	56.78	RS1	153.22	103.85	26.202	28.709	105.64	31.434	121.34	61.768	46	63.232	63.721	49.2	105.92	39.366	11.584	72.734	39.815	12.807	91.711	42.069	52.908	88.267	19.046	16.263	87.965	32.417	5.6774
1471	Female	57.61	RS1	151.13	98.154	31.611	24.521	108.4	33.74	115.48	59.326	51.6	57.373	64.209	52.4	100.71	38.081	9.3614	66.317	40.375	11.497	85.9	37.773	57.052	82.775	17.297	17.62	83.588	32.223	6.113
1472	Male	58.26	RS1	150.87	108.23	32.306	22.247	107.4	26.271	115.48	65.186	47.6	51.514	65.186	46	104.45	43.77	5.4612	66.468	44.543	6.1689	83.533	39.141	46.868	85.593	17.339	6.558	85.974	36.106	1.6246
1473	Female	57.59	RS1	149.19	110.95	29.926	26.596	115.31	28.509	118.41	66.162	40.4	55.42	69.092	40.4	103.41	55.136	3.3686	68.698	56.65	3.8776	86.257	44.152	40.912	84.035	35.47	3.8595	85.984	51.043	0.10744
1474	Female	56.56	RS1	153.76	114.72	29.645	30.093	102.16	19.621	120.36	73.975	46.8	64.697	68.115	42.8	115.71	56.201	8.1325	80.659	52.456	6.1852	95.726	47.243	49.334	99.993	31.176	8.9566	99.293	46.957	1.6919
1475	Female	56.52	RS1	152.78	113.11	36.74	24.426	118.08	42.384	119.87	75.928	56.4	56.885	78.857	58.8	101.22	52.783	16.572	68.21	54.597	17.502	87.629	53.661	63.297	81.64	28.746	22.68	82.492	44.238	10.317
1476	Male	57.1	RS1	154.73	94.846	26.59	26.375	89.824	29.358	124.76	54.932	54	61.768	50.537	58	110.98	30.796	14.922	74.822	29.207	16.339	94.922	31.664	63.603	93.789	3.7502	24.193	92.775	20.576	10.422
1477	Male	57.76	RS1	157.18	105.83	36.758	27.583	102.21	37.086	126.22	57.861	56.4	61.279	55.908	58	113.08	37.927	18.239	78.03	36.462	19.745	95.315	33.462	67.04	95.611	10.522	25.156	95.696	28.157	13.566
1478	Female	57.45	RS1	151.99	97.834	43.105	30.065	96.755	36.925	121.83	54.932	61.2	61.279	52.978	58	111.73	40.289	22.317	76.254	39.346	21.519	91.64	37.723	63.746	94.062	16.602	28.303	94.013	32.24	16.046
1479	Female	57.51	RS1	152.76	110.93	33.737	29.792	106.9	34.712	126.71	64.697	46	61.279	61.768	47.6	111.39	45.888	9.5233	74.836	44.74	9.8558	94.428	37.895	50.992	93.987	21.512	10.5	93.521	39.195	2.531
1480	Female	57.22	RS1	152.27	116.16	19.109	28.461	109.35	26.537	125.73	69.58	28.4	63.721	67.627	32.4	111.25	60.867	1.8223	74.31	59.883	3.755	96.489	47.094	37.086	94.979	40.446	2.0172	94.07	56.884	0.78689
1481	Female	56.77	RS1	143.53	107.86	35.815	24.066	115.42	33.588	110.11	68.115	51.6	48.096	72.51	50.8	98.389	50.087	16.892	61.45	51.54	15.432	77.999	44.508	57.313	79.816	27.601	17.435	80.303	44.176	8.3084
1482	Male	56.27	RS1	157.13	101.96	38.665	24.764	96.47	34.735	124.27	55.908	53.2	59.326	52.978	50.8	111.81	34.362	15.719	73.102	33.783	13.538	92.238	26.357	59.97	93.804	7.5123	18.656	92.057	25.607	8.1515
1483	Male	57.69	RS1	148.81	95.923	24.121	17.823	105.91	22.749	110.6	52.978	38	46.143	58.838	35.6	94.015	37.996	6.1716	56.802	44.192	3.5589	76.202	32.829	43.907	73.536	13.862	7.107	74.524	33.274	2.9919
1484	Male	56.88	RS1	154.28	98.42	20.2	17.677	105.49	25.066	115.48	54.443	45.2	52.002	58.838	47.6	100.49	34.79	4.5814	62.322	37.76	6.511	83.111	30.831	52.794	80.276	12.209	6.5634	80.699	29.562	-1.089
1485	Male	57.33	RS1	155.49	112.82	22.268	27.81	111.42	28.59	127.69	64.209	34	57.861	64.209	38	110.04	50.59	5.1033	72.058	50.107	5.8161	94.563	36.876	37.664	94.51	27.228	5.2991	91.404	45.184	3.2949
1486	Female	56.63	RS1	153.04	100.65	43.288	23.637	107.93	28.004	115.48	57.861	51.6	52.978	62.744	45.2	103.27	45.928	10.438	70.527	46.93	7.5776	82.965	38.914	53.421	86.433	22.704	11.739	87.626	39.743	2.5478
1487	Male	58.06	RS1	154.05	100.69	45.529	24.187	94.653	45.131	124.27	61.279	76.4	56.885	56.885	75.6	110.78	34.053	38.279	67.496	31.704	36.884	90.804	39.278	85.781	90.576	13.405	44.871	89.683	27.033	33.234
1488	Female	57.72	RS1	149.97	107.01	30.291	24.192	103.21	38.34	121.34	59.326	53.2	56.885	58.35	58	106.11	34.26	20.391	67.506	33.251	23.195	89.171	35.984	64.131	88.608	8.5829	27.902	86.628	24.181	15.495
1489	Male	58.02	RS1	160.59	109.74	27.782	26.358	105.59	22.632	125.73	60.303	44.4	62.744	58.838	42	113.63	41.345	5.0924	78.676	39.766	6.3935	94.726	35.268	46.425	97.672	15.939	7.6183	97.608	32.742	3.5071
1490	Female	57.18	RS1	154.45	116.09	26.418	27.788	95.948	33.369	130.13	73.486	47.6	66.162	66.65	50.8	115.83	58.326	10.245	81.357	52.508	10.175	101.21	45.484	51.59	102.72	33.864	12.03	99.921	49.496	4.0099
1491	Female	57.82	RS1	152.45	113.67	34.143	27.031	100.81	33.742	127.2	70.068	54.8	58.838	63.232	55.6	112.93	47.286	18.774	76.824	43.199	18.039	95.187	43.083	58.888	97.747	25.414	23.727	95.374	39.16	13.924
1492	Male	56.32	RS1	156.27	86.635	30.655	17.008	95.885	23.997	116.46	46.143	46.8	49.561	50.537	42	101.92	25.877	5.2958	64.983	28.898	5.5067	81.543	18.587	50.305	83.392	2.059	7.066	84.002	19.768	0.39509
1493	Male	57.28	RS1	155.28	107.26	29.111	24.581	101.11	29.258	123.78	54.932	45.2	59.326	52.002	46.8	110.88	35.72	7.3812	72.385	33.856	6.8303	91.231	27.44	54.689	91.903	5.4758	9.5402	91.435	25.009	0.39056
1494	Female	58.02	RS1	157.5	108.76	31.706	29.268	102.81	24.27	127.2	65.674	45.2	62.256	63.232	40.4	114.22	49.99	6.8786	80.677	48.284	6.1584	95.219	42.133	46.999	97.795	29.924	9.1814	97.528	44.379	2.0121
1495	Male	57.2	RS1	161.87	105.41	28.729	29.777	99.521	25.409	129.15	66.65	46	66.162	63.232	45.2	118.43	43.158	9.4484	79.503	40.954	9.0482	100.33	39.74	49.119	99.58	16.959	13.135	99.543	34.312	3.2511
1496	Male	56.19	RS1	155.57	95.327	32.56	17.962	95.762	31.297	122.31	52.002	50	49.072	52.49	49.2	105.63	37.192	5.1664	69.494	37.626	5.0433	86.066	27.688	56.039	88.761	10.342	6.2532	88.859	31.249	-1.325
1497	Male	57.87	RS1	153.55	105.17	32.019	25.341	96.18	33.611	124.27	61.279	53.2	62.744	55.908	54.8	112.4	40.845	10.68	76.317	37.748	12.235	97.716	34.567	62.549	96.689	9.6447	16.375	94.882	30.336	4.7988
1498	Male	56.63	RS1	152.36	107.62	36.492	28.462	105.11	33.544	121.83	68.115	54	61.279	66.65	53.2	108	48.711	10.17	73.834	48.369	9.2112	91.133	41.305	59.078	91.73	19.783	13.9	90.808	39.556	4.1756
1499	Female	56.09	RS1	145.86	99.114	31.078	24.601	109.88	21.779	111.08	63.721	46	54.932	67.627	42.8	98.537	45.734	7.7178	66.254	47.939	7.7435	80.988	44.505	48.41	80.546	26.024	8.5145	82.204	39.641	3.6343
1500	Female	57.88	RS1	151.27	105.95	40.629	24.552	104.52	37.62	119.38	63.232	58.8	54.932	62.744	58.8	106.66	44.832	18.33	71.494	44.593	18.322	87.476	39.921	64.066	89.059	20.235	24.15	88.895	37.24	12.564
1501	Female	56.56	RS1	153.62	106.36	30.095	24.249	108.55	28.174	122.31	62.744	48.4	56.396	63.232	46	108.62	41.95	8.2623	72.294	42.071	7.6457	89.909	38.568	54.409	89.245	16.464	13.354	90.188	34.493	3.0969
1502	Male	56.16	RS1	161.34	103.43	32.066	27.64	95.254	28.726	131.1	57.861	58	62.256	53.955	56.4	115.81	34.31	13.465	78.116	31.171	12.023	96.664	32.063	65.989	97.88	7.679	21.095	97.193	23.48	8.8542
1503	Male	56.54	RS1	152.14	103.24	25.257	24.165	111.29	26.668	118.9	61.279	37.2	54.443	65.674	34.8	102.43	47.069	5.4644	67.252	50.362	4.6867	84.7	38.606	36.679	82.229	24.707	4.9468	84.63	44.291	3.5484
1504	Female	57.3	RS1	145.17	110.59	40.665	23.263	108.79	41.148	114.99	68.603	59.6	53.467	68.603	60.4	100.1	46.551	21.332	65.46	46.186	22.162	83.942	47.196	66.028	82.966	25.135	28.312	82.253	39.879	17.03
1505	Female	57.77	RS1	150.29	110.09	25.239	22.86	112.52	26.084	116.46	68.603	40.4	51.514	70.557	40.4	97.086	54.097	4.4075	67.371	55.099	4.7336	83.051	46.088	43.038	80.426	33.303	4.542	80.566	47.736	2.1303
1506	Female	56.53	RS1	148.84	103.81	31.35	24.638	119.57	28.42	110.11	72.51	42.8	49.561	80.322	42.8	93.399	52.732	6.7467	62.547	57.536	6.4958	77.409	51.21	47.717	76.26	29.937	8.8713	77.371	47.884	1.6735
1507	Female	56.61	RS1	152.41	115.77	24.849	22.406	113.03	26.783	120.36	75.928	44.4	56.396	73.486	45.2	109.39	51.991	5.5928	67.83	51.27	6.0498	88.895	46.517	49.794	89.035	28.702	10.405	88.248	45.17	-0.071974
1508	Female	57.57	RS1	147.86	107.93	28.744	21.354	102.73	29.473	119.38	63.721	46.8	54.932	60.303	48.4	105.19	41.673	10.071	69.134	40.017	10.42	87.678	37.255	54.104	87.382	16.748	13.601	87.615	32.62	3.9718
1509	Female	56.78	RS1	150.69	106.09	29.057	20.552	93.63	38.671	121.34	62.256	53.2	57.861	56.396	58.8	108.44	42.396	12.233	68.956	38.676	14.196	91.108	38.627	59.656	89.686	19.799	17.039	89.238	35.439	6.0116
1510	Female	57.54	RS1	143.74	105.1	47.346	21.998	106.18	53.526	113.53	70.068	73.2	51.025	69.58	75.6	96.645	41.646	39.507	59.972	40.969	41.006	81.577	47.527	82.531	79.574	17.67	50.878	77.528	31.15	37.629
1511	Male	57.22	RS1	151.39	103.46	20.719	20.07	105.51	22.34	120.36	58.35	32.4	53.467	57.373	33.2	106.58	43.066	3.1663	67.671	43.607	3.7678	89.387	35.897	38.234	88.925	24.247	1.7253	88.729	39.735	-0.15409
1512	Male	57.05	RS1	156.34	109.61	37.701	22.159	107.74	38.295	125.24	63.232	56.4	56.396	60.303	58	112.05	45.519	14.583	71.157	43.116	13.364	92.9	42.529	65.59	95.616	15.578	21.074	92.538	35.201	7.0535
1513	Female	57.08	RS1	160.91	106.35	34.552	33.211	97.352	23.497	129.64	65.674	50	68.603	59.814	44.4	124.31	43.321	8.4315	88.16	40.251	5.3874	101.57	37.434	52.049	108.67	16.24	10.389	108.02	33.599	0.87013
1514	Female	56.81	RS1	150.91	103.21	37.725	22.429	99.6	35.171	120.36	65.186	59.6	54.932	64.209	58.8	107.81	43.474	25.395	69.32	42.362	24.522	87.613	44.844	68.036	88.856	22.648	34.204	89.304	36.145	21.845
1515	Female	56.61	RS1	152.25	97.167	41.259	23.184	101.4	35.986	114.01	65.186	58	54.932	68.115	54.8	102.62	44.375	17.56	67.251	46.031	15.837	83.354	44.6	58.598	83.345	25.345	20.833	84.847	40.64	11.275
1516	Female	57.1	RS1	154.82	101.52	27.392	30.957	95.185	26.456	126.71	64.209	42	62.744	59.814	42.8	114.2	47.327	4.9826	80.724	45.58	5.1682	96.74	35.803	46.936	99.152	27.246	5.8232	98.781	40.937	1.7505
1517	Female	56.47	RS1	155.69	93.357	41.7	26.017	95.914	36.385	119.87	64.697	66	57.373	67.627	65.2	106.17	31.27	35.883	69.992	35.01	34.239	88.055	40.756	75.832	87.544	5.0454	45.703	87.455	21.266	30.154
1518	Female	56.32	RS1	146.54	119.79	31.441	26.276	111.24	33.424	118.41	77.881	48.4	57.373	74.463	50	106.77	54.512	11.209	69.22	51.772	12.035	89.874	48.523	51.821	89.556	28.349	13.926	88.737	45.92	4.7634
1519	Male	57.09	RS1	157.64	105.35	25.114	20.445	101.96	27.156	126.22	63.721	42.8	53.955	60.791	46	107.54	43.68	6.1658	68.73	40.797	6.5696	91.028	34.125	47.569	88.754	15.199	7.489	88.205	35.141	1.3659
1520	Female	57.59	RS1	146.09	111.45	23.528	21.832	110.98	29.163	116.46	65.186	39.6	53.955	64.697	42.8	100.77	50.981	4.2529	63.561	50.015	5.6768	86.317	47.118	50.347	83.93	28.382	8.0025	82.367	44.31	-0.68124
1521	Male	57.93	RS1	155.9	101.11	37.27	22.344	99.259	43.792	122.8	55.908	60.4	57.861	55.908	62	107.83	35.995	23.241	69.099	36.268	25.278	91.525	34.425	69.08	87.717	12.257	34.145	88.161	26.688	20.377
1522	Male	56.74	RS1	157.26	103.68	37.966	19.112	92.285	39.814	123.29	63.232	59.6	56.885	57.861	61.2	107.7	37.12	22.462	72.29	32.307	22.331	92.731	35.742	68.638	93.02	8.3328	32.953	90.117	25.931	18.532
1523	Male	57.35	RS1	155.59	113.74	39.578	19.196	115.74	38.306	120.36	66.162	56.4	52.49	66.65	56.4	109.09	46.434	14.557	65.968	42.482	12.655	87.49	40.353	64.535	91.444	13.737	18.787	88.348	34.569	6.8869
1524	Male	57.47	RS1	152.39	109.21	37.964	25.35	107.75	36.083	117.92	70.557	54.8	55.908	69.58	52.4	106.14	46.279	11.777	66.03	45.917	10.909	87.069	42.19	59.176	86.295	21.816	17.215	85.2	38.034	5.8018
1525	Female	57.04	RS1	152.4	93.243	40.77	29.463	99.67	32.75	117.43	54.932	58.8	57.861	58.838	54	106.89	33.063	20.991	73.127	35.148	18.179	86.967	33.453	60.988	88.061	13.767	26.45	89.801	27.423	14.511
1526	Male	55.81	RS1	155.32	103.78	21.294	21.416	103.9	19.03	120.36	61.279	36.4	56.396	59.326	34	108.41	42.749	5.6622	69.697	43.223	4.3624	88.762	34.22	43.383	88.352	13.405	7.5493	88.648	35.716	2.0063
1527	Male	56.98	RS1	160.98	103.39	32.401	20.515	97.443	34.072	126.71	53.955	59.6	63.232	50.537	59.6	119.46	33.08	20.039	76.256	29.48	19.328	97.009	28.085	66.866	100.12	3.9914	23.836	99.375	21.375	11.807
1528	Female	57.54	RS1	157.69	108.28	38.549	26.281	103.81	40.886	126.22	66.162	58.8	61.768	63.721	61.2	111.05	49.171	21.576	79.256	46.206	22.918	95.709	45.114	65.693	97.345	26.569	28.95	95.9	41.154	17.231
1529	Female	57.5	RS1	153.23	105.5	37.157	26.771	100.7	44.629	123.78	69.092	60.4	61.279	65.674	64.4	109.44	37.83	24.34	75.3	35.426	25.995	93.85	42.618	67.472	94.528	13.163	32.015	92.099	28.4	19.926
1530	Female	56.25	RS1	154.35	91.095	50.395	33.39	92.921	29.126	119.87	53.955	72.4	56.885	55.908	60.4	113.39	29.163	37.758	75.249	29.546	31.143	87.623	34.769	77.49	92.774	5.5481	38.263	94.398	22.052	26.858
1531	Female	57.55	RS1	154.5	108.24	38.866	29.637	105.5	39.048	122.8	64.209	55.6	63.721	63.232	57.2	113.23	44.902	18.943	76.181	42.873	19.204	93.776	40.766	61.481	96.031	21.897	22.655	94.169	37.591	11.729
1532	Male	56.23	RS1	154.62	98.884	28.515	20.887	87.316	35.015	125.73	56.885	55.6	61.768	50.049	59.6	112.8	31.41	18.049	75.374	26.84	19.111	96.282	30.926	69.935	97.189	3.0363	26.079	94.638	19.322	12.262
1533	Female	56.57	RS1	149.97	101.31	34.714	25.602	105.55	28.009	117.92	60.791	47.6	52.978	62.256	43.6	104.45	44.785	6.1319	70.697	45.448	5.852	84.758	39.579	52.067	88.443	21.439	9.973	88.344	38.259	0.36387
1534	Male	57.51	RS1	154.56	112.81	21.977	22.865	112.78	20.667	120.85	68.603	34.8	54.932	69.092	35.6	106.57	55.492	6.1309	68.816	54.537	5.2655	87.904	38.238	38.356	90.015	28.875	5.6949	87.412	49.62	2.4639
1535	Male	57.12	RS1	154.67	95.015	34.737	20.951	93.132	35.933	122.31	55.908	62.8	54.443	54.443	64.4	107.08	27.646	27.48	67.866	27.009	26.131	89.09	30.545	74.986	88.108	3.0926	35.153	87.435	16.479	20.462
1536	Female	56.25	RS1	152.33	120.26	33.05	29.304	110.28	31.719	125.24	75.928	46.8	61.768	71.533	45.2	111.96	55.507	6.0351	77.396	53.136	5.373	94.749	51.396	50.818	98.065	29.984	8.6271	96.025	46.536	0.83707
1537	Male	56.46	RS1	147.24	97.091	34.229	19.348	105.96	32.25	113.04	52.978	53.2	46.631	56.885	53.2	94.652	31.544	11.488	57.982	34.633	11.377	79.566	30.561	61.496	73.068	7.601	13.45	73.92	25.102	3.3061
1538	Male	56.05	RS1	157.84	101.48	45.931	23.336	100.45	35.669	119.87	63.721	74	54.443	64.697	70	105.94	36.458	34.383	69.482	36.974	31.502	86.193	43.508	83.899	88.225	10.292	41.859	87.369	26.922	28.277
1539	Male	57.55	RS1	151.47	104.08	26.888	22.502	94.452	36.581	122.8	59.326	56.4	58.35	54.443	62.8	107.43	32.973	19.283	68.33	28.97	23.995	92.27	33.578	68.531	88.634	7.9875	27.428	87.914	22.617	15.535
1540	Male	56.25	RS1	157.44	103.7	26.827	20.826	93.503	25.327	125.73	59.326	47.6	56.885	53.467	46.8	112.51	36.814	8.449	75.112	33.194	7.367	93.09	29.083	55.076	95.054	6.9753	11.565	94.541	26.151	2.2458
1541	Male	55.59	RS1	156.08	103.6	30.854	20.433	95.414	31.198	124.27	61.768	58	56.885	58.838	58	109.63	34.85	14.069	71.048	32.528	13.678	91.703	32.188	69.168	91.953	6.9246	18.874	91.576	25.847	7.8262
1542	Female	56.25	RS1	146.46	102.59	41.006	18.443	109.6	40.668	113.04	64.209	59.6	49.072	66.65	61.2	97.372	40.251	23.337	59.725	41.883	23.346	80.71	45.165	67.358	79.987	19.809	32.798	77.903	32.128	19.98
1543	Female	57.26	RS1	151.27	107.9	36.878	28.017	109.14	38.808	119.87	70.068	51.6	59.326	70.068	52.4	105.81	53.107	13.942	71.161	52.719	13.233	89.655	44.643	55.022	88.505	31.199	16.69	88.296	47.53	6.5801
1544	Male	56.31	RS1	156.58	101.55	25.243	27.721	94.708	33.224	126.71	59.814	47.6	62.256	57.861	50.8	112.29	39.051	11.362	75.742	38.586	13.07	96.534	33.866	57.932	96.066	12.087	18.324	94.642	31.132	7.5234
1545	Male	57.07	RS1	154.99	107.16	24.674	24.059	96.917	27.089	125.24	59.814	42.8	61.279	54.932	42	111.27	47.324	4.4314	73.485	44.75	4.309	94.308	35.132	47.692	93.606	21.801	3.9656	92.368	40.637	-1.3133
1546	Female	56.79	RS1	150.76	101.47	30.385	29.912	100.61	29.41	121.34	57.373	46.8	58.35	55.908	46.8	106.47	40.925	6.936	73.798	40.132	6.5314	89.649	32.328	51.124	91.007	18.299	8.2735	90.124	33.874	1.6069
1547	Male	57.63	RS1	156.88	103.41	37.035	25.762	90.09	30.323	125.73	58.838	54	63.232	52.002	50.8	118.22	37.154	14.625	82.209	32.17	12.594	97.094	30.492	58.948	102.92	6.3815	18.107	102.19	23.617	6.8949
1548	Male	56.64	RS1	158.78	106.31	35.935	15.88	105.68	33.068	125.73	56.885	63.6	48.096	56.396	64.4	111.8	36.643	20.437	65.845	35.873	18.387	86.756	37.863	73.02	89.597	10.255	28.919	89.373	26.75	13.739
1549	Male	56.47	RS1	153.07	94.189	49.253	23.748	99.142	40.57	117.43	58.35	72.4	51.514	62.256	67.6	106.34	33.506	39.21	63.961	34.562	35.705	82.626	41.431	82.742	86.904	9.6362	43.674	85.952	24.774	31.326
1550	Male	56.03	RS1	148.02	99.752	32.919	20.605	113.68	30.796	109.13	56.885	43.6	48.584	62.744	42.8	94.437	41.646	5.9734	61.845	44.248	5.0069	75.944	37.058	47.936	74.09	16.401	7.4653	77.243	34.565	2.356
1551	Male	55.75	RS1	153.29	100.61	33.602	23.853	100.73	34.714	120.85	55.908	47.6	54.443	55.908	47.6	105.68	43.688	6.9252	71.18	43.577	6.3159	88.53	31.837	50.221	89.528	19.323	5.2155	88.924	37.715	0.32836
1552	Male	56.69	RS1	155.49	113.36	23.186	22.115	113.47	21.156	123.29	63.232	34	53.467	61.768	32.4	106.94	54.499	5.7068	72.097	53.698	6.0525	89.635	39.967	38.762	90.104	29.384	0.9227	90.679	49.134	1.8274
1553	Male	57.05	RS1	157.39	91.78	29.603	17.553	99.893	47.837	124.27	62.256	67.6	56.885	64.209	77.2	108.88	32.334	30.176	68.237	33.174	33.981	93.373	38.29	85.028	89.875	4.679	39.795	88.12	21.669	26.178
1554	Female	56.36	RS1	147.75	109.06	31.85	23.173	104.36	38.178	118.9	65.674	52.4	56.885	62.744	55.6	100.72	42.164	8.9645	67.865	39.665	9.6095	88.447	39.664	57.316	88.246	15.156	15.267	84.417	31.487	3.2573
1555	Female	56.56	RS1	151.13	110.35	27.456	31.466	103.21	32.32	124.76	67.627	43.6	62.256	62.256	48.4	111.92	49.592	4.9481	76.693	45.386	6.7599	96.37	43.201	47.268	97.951	27.195	7.1002	95.264	42.794	-0.45881
1556	Male	55.63	RS1	157.67	95.975	16.524	19.837	105.72	17.53	120.85	47.119	19.6	50.049	51.025	17.2	102.45	43.383	-1.4389	67.841	45.156	-5.2871	83.349	24.164	23.393	82.838	15.179	-5.8157	85.196	39.418	-7.874
1557	Female	57.17	RS1	143.85	102.96	24.333	19.722	95.494	37.174	115.48	64.209	42.8	53.955	60.303	50.8	96.948	42.44	4.7375	62.602	39.972	6.0158	87.128	37.468	51.178	81.811	15.353	6.7152	79.407	33.625	-0.93835
1558	Male	56.93	RS1	161.13	97.709	47.576	29.771	87.562	37.242	129.15	58.35	66	65.186	51.025	63.6	119.89	30.244	24.99	78.927	27.441	22.766	98.423	31.158	75.253	101.02	3.6949	29.764	100.67	19.201	16.63
1559	Male	55.85	RS1	151.9	112.52	36.024	26.481	114.89	26.519	118.9	67.139	50	56.396	68.603	43.6	109.82	50.054	10.509	70.963	50.288	7.3533	86.569	47.813	54.657	89.193	23.597	13.773	90.746	41.338	3.2166
1560	Male	57.29	RS1	153.86	115.72	26.023	20.368	118.95	23.464	117.92	70.557	27.6	53.467	72.021	26.8	102.02	61.843	-0.37158	68.307	64.083	0.30725	85.187	44.439	26.312	84.457	39.953	-1.7551	84.654	61.087	0.23989
1561	Female	55.9	RS1	153.54	111.03	33.642	31.243	113.04	23.369	120.36	68.603	46	61.279	69.58	40.4	114.33	50.088	5.4669	77.797	50.295	5.0845	91.192	41.66	47.359	96.892	24.276	6.6326	97.362	43.047	-0.44205
1562	Female	56.53	RS1	148.52	106.58	26.703	22.381	97.427	34.832	118.9	68.115	44.4	60.303	63.721	48.4	106.45	54.255	3.5255	75.221	49.844	4.7635	91.78	41.801	49.085	95.964	29.723	5.3671	92.783	47.231	-2.1055
1563	Female	56.66	RS1	151.09	102.56	34.672	20	105.97	32.579	114.99	63.232	52.4	51.025	66.65	50.8	98.726	50.942	5.6986	67.568	51.609	5.9495	81.419	40.887	55.699	81.703	26.9	6.7184	82.907	45.538	-1.8314
1564	Male	57.17	RS1	154.15	100.02	30.434	22.37	98.478	35.248	121.83	58.838	50	60.303	57.861	52.4	107.34	43.212	8.0952	70.514	41.899	8.5176	92.016	33.592	55.592	90.172	14.412	9.7586	88.957	33.679	0.99844
1565	Female	55.55	RS1	155.11	101.15	33.697	28.753	95.632	41.608	127.69	65.674	56.4	62.256	61.768	61.2	110.92	38.697	23.59	77.303	35.646	25.314	97.314	37.799	66.633	97.061	14.28	29.358	94.675	30.099	19.345
1566	Male	55.45	RS1	157.49	95.436	23.647	22.815	98.691	21.518	122.31	52.002	41.2	55.908	53.955	40.4	106.17	37.711	7.1008	70.564	38.654	6.2263	88.497	29.721	46.948	86.314	11.626	7.7246	88.425	31.532	2.8423
1567	Male	55.58	RS1	150.12	99.696	33.571	21.633	95.406	38.52	122.8	51.514	48.4	53.955	47.607	52.4	110.16	32.171	7.9956	65.079	27.521	8.9681	90.4	23.565	55.151	91.711	1.7345	10.975	87.919	20.588	0.23415
1568	Female	55.88	RS1	158.18	102.39	41.025	39.438	83.779	35.548	131.59	61.279	65.2	74.463	52.002	62.8	124.45	35.42	24.231	92.413	28.9	21.835	106.16	33.28	71.311	111.54	9.8306	29.784	109.72	24.027	17.804
1569	Female	56	RS1	150.87	105.22	31.665	23.671	91.996	42.051	124.76	69.58	61.2	63.232	63.232	66.8	113.38	43.186	24.418	77.075	38.032	26.513	96.714	42.492	70.697	99.07	15.646	30.472	95.97	33.042	20.004
1570	Female	56.62	RS1	144.42	105.57	31.876	25.881	108.17	26.81	114.01	67.627	45.2	52.49	70.557	43.6	99.53	53.47	6.4913	67.134	54.814	7.0962	82.942	44.137	46.008	84.912	28.751	7.8273	84.88	47.441	2.8017
1571	Male	56.41	RS1	155.31	95.115	33.417	27.563	95.326	32.709	122.8	52.49	48.4	59.326	52.49	48.4	106.76	35.454	7.5484	73.733	35.261	7.8751	90.86	29.643	54.379	89.516	9.6193	9.4936	90.038	28.448	1.4127
1572	Female	55.88	RS1	148.28	100.12	45.208	32.975	100.16	29.331	117.43	63.232	58.8	58.35	66.65	51.6	109.32	47.692	14.055	78.129	47.177	9.2513	86.797	37.857	59.064	93.641	24.664	12.847	94.944	42.849	4.3074
1573	Male	55.84	RS1	155.53	106.96	48.217	29.841	101.79	39.137	122.8	64.697	72.4	63.232	61.279	69.2	115.76	37.645	33.498	73.662	36.765	30.381	92.427	38.691	80.881	95.563	8.735	39.767	95.733	25.689	24.312
1574	Male	55.73	RS1	152.84	106.9	37.946	18.664	102.68	39.416	118.41	68.115	55.6	53.955	68.603	55.6	104.93	47.484	20.767	67.104	46.076	20.237	86.894	42.224	63.99	87.114	19.126	24.629	85.287	37.153	12.259
1575	Female	56.99	RS1	155.81	116.93	35.219	26.998	110.31	29.509	126.22	68.603	49.2	63.232	65.186	46.8	114.82	53.922	7.9607	80.871	50.726	5.9178	95.727	47.719	54.238	102.29	30.229	7.8638	99.356	44.974	3.1594
1576	Female	56.79	RS1	153.03	89.494	30.184	22.997	95.256	30.813	114.99	58.35	50.8	54.443	62.744	50	101.48	40.278	12.168	67.893	41.488	12.293	83.376	39.149	55.327	84.053	18.684	16.467	84.926	33.274	6.4026
1577	Male	57.19	RS1	155.65	110.16	25.714	28.692	101.96	24.434	124.27	65.674	42.8	64.209	62.256	43.6	112.18	50.344	5.2541	78.53	47.918	4.334	94.834	41.212	46.451	96.049	25.115	7.1298	95.451	42.388	0.0041315
1578	Female	56.98	RS1	147.97	105.17	32.652	25.136	116.78	32.144	111.57	67.627	55.6	52.978	73.486	55.6	94.555	48.387	13.103	60.558	51.166	14.091	78.76	47.312	60.084	76.261	27.037	17.742	76.835	42.584	8.509
1579	Male	55.94	RS1	148.4	94.308	28.824	20.498	99.207	23.644	115.48	50.537	46.8	50.049	52.978	43.6	102.49	31.498	8.8735	63.468	33.265	8.1448	82.248	32.043	54.437	81.107	6.8224	11.31	82.613	24.61	1.4539
1580	Male	55.79	RS1	157.5	113.39	34.571	28.196	105.46	23.38	124.27	70.068	58.8	61.279	67.139	53.2	115.01	50.129	16.958	79.093	47.431	13.883	92.722	45.654	64.378	96.778	25.36	22.453	97.552	40.59	11.484
1581	Male	56.76	RS1	154.34	110.32	26.911	22.344	95.394	35.122	128.66	56.885	42	61.279	49.072	46.8	111.23	45.012	7.2884	75.401	40.903	7.4302	97.989	29.911	52.079	97.19	13.559	9.236	93.842	36.265	2.2009
1582	Female	55.28	RS1	159.25	112.97	37.658	27.98	99.307	38.472	129.64	67.627	57.2	68.115	61.279	58	118.19	44.385	17.085	82.355	39.984	17.251	101.24	41.127	65.202	104.5	16.587	22.243	101.6	34.044	10.965
1583	Female	56.16	RS1	157.95	105.65	30.949	24.415	98.074	30.57	126.71	65.186	46	62.744	61.279	45.2	110.91	46.919	6.4623	78.741	45.363	5.6722	96.099	37.398	48.406	96.453	25.715	6.2316	95.45	41.726	0.17732
1584	Female	56.42	RS1	155.67	104.77	36.104	35.722	89.9	35.758	131.1	61.279	58.8	69.58	53.955	58	118.5	37.195	19.388	89.115	32.663	18.459	102.97	32.86	65.982	107.77	9.5013	28.402	104.9	26.896	15.229
1585	Male	57.13	RS1	153.35	105.47	29.462	22.049	108.92	20.9	119.38	66.162	42	52.49	67.627	38.8	107.7	44.456	7.3125	68.556	45.134	5.9339	85.127	41.791	47.048	86.79	20.682	8.342	89.021	37.794	1.9124
1586	Female	56.78	RS1	154.14	113.79	39.229	33.075	98.124	41.578	128.66	76.904	70.8	66.65	68.115	72.4	114.92	44.926	39.308	85.726	40.27	39.537	101.04	47.27	84.192	103.16	19.877	50.923	101.19	34.533	37.81
1587	Female	57.07	RS1	151.2	124.8	33.121	30.762	111.61	31.424	126.71	79.834	43.6	63.232	73.486	43.6	112.59	63.748	7.311	78.462	59.556	7.4996	96.624	52.966	49.763	98.11	40.374	12.217	96.973	56.075	2.3567
1588	Male	55.8	RS1	154.28	99.286	26.954	20.711	97.426	34.024	123.29	59.326	48.4	56.396	57.861	50	104.69	39.137	5.2528	67.878	38.025	6.4555	90.285	30.407	55.155	87.509	12.463	6.6883	85.954	30.958	-0.55295
1589	Female	55.45	RS1	149	95.408	33.953	22.668	103.16	29.273	113.53	59.814	47.6	52.49	64.209	45.2	97.976	43.334	5.3795	66.736	44.975	5.0502	81.995	36.317	51.002	81.71	20.332	6.6071	82.054	37.265	-0.27659
1590	Male	56.23	RS1	155.17	102.89	37.046	28.986	93.13	31.464	123.29	61.279	54.8	64.209	57.861	53.2	114.92	40.282	12.337	79.991	38.377	10.496	94.76	35.817	56.52	98.356	15.882	15.902	98.028	31.466	5.4534
1591	Female	56.12	RS1	156.94	90.694	30.983	26.499	91.622	27.813	126.22	54.443	57.2	58.35	53.955	55.6	106.8	28.938	19.028	77.731	28.102	17.972	91.915	31.241	63.463	93.72	8.6289	28.145	92.847	22.065	14.212
1592	Female	56.65	RS1	147.31	97.664	34.591	26.625	105.72	33.374	114.99	58.35	46	55.42	60.791	46.8	101.57	41.477	6.7782	67.268	43.652	7.3241	82.979	34.262	52.527	83.014	16.467	11.75	84.715	33.791	2.1561
1593	Female	56.41	RS1	153.25	91.11	45.851	32.514	98.451	31.269	119.87	57.861	60.4	60.791	61.768	52.4	109.71	38.326	18.979	77.632	39.349	14.189	88.731	35.197	62.034	95.37	15.33	19.487	95.372	32.066	9.6091
1594	Male	56.02	RS1	160.04	93.774	38.966	22.029	97.94	34.323	122.8	45.654	60.4	56.885	48.096	58.8	111.22	24.218	17.207	69.268	25.633	14.479	87.928	26.267	67.886	89.254	2.0009	22.529	90.83	15.555	8.6624
1595	Female	55.53	RS1	154.57	103.22	47.012	25.03	107.57	38.246	117.92	68.603	63.6	55.42	69.58	60.4	105.03	46.032	21.954	71.162	46.7	19.919	85.34	45.455	70.829	87.389	22.042	27.469	87.401	38.434	15.796
1596	Female	56.35	RS1	151.88	96.988	33.054	19.961	110.69	29.996	110.11	60.303	47.6	49.072	68.115	46.8	93.428	41.076	10.713	59.385	44.504	10.184	76.075	38.413	53.754	74.301	20.962	13.139	75.256	37.484	5.1211
1597	Female	56.27	RS1	153.31	100.22	28.619	21.988	98.214	26.328	119.87	60.303	45.2	56.396	58.838	43.6	108.86	36.519	4.9391	68.888	36.841	4.288	89.813	33.827	49.845	89.09	13.389	7.2759	88.979	28.011	-0.52001
1598	Female	56.98	RS1	152.04	106.34	32.452	26.71	109.91	29.252	120.36	61.768	53.2	56.396	63.232	50.8	104.05	40.819	14.155	71.141	40.555	14.18	87.725	37.251	58.348	86.84	17.752	16.722	88.318	33.633	7.3844
1599	Female	56.68	RS1	150.64	97.219	30.618	25.87	103.92	26.922	118.9	57.861	45.2	56.396	60.303	44.4	105.91	41.197	7.6708	69.144	41.446	6.994	86.789	35.656	52.019	88.666	15.937	10.99	88.056	32.558	2.5004
1600	Female	55.52	RS1	155.75	115.19	37.271	33.837	128.56	28.171	119.87	82.275	47.6	61.768	86.67	42.8	108.23	63.698	4.2158	76.415	66.925	2.9359	89.105	58.435	49.1	90.114	44.226	5.5595	92.379	59.025	-2.2894
1601	Female	55.78	RS1	157.46	112.54	30.396	25.359	110.49	26.989	124.27	78.369	49.2	60.791	72.998	47.6	110.9	54.637	6.7366	74.74	53.469	6.5226	92.329	47.595	52.528	92.346	30.177	7.4035	92.805	47.342	0.30132
1602	Female	56.35	RS1	155.36	102.21	20.031	37.752	103.47	15.87	126.71	56.396	23.6	63.232	55.42	17.2	114.14	47.917	2.3532	79.968	48.667	-2.1034	95.146	27.544	20.454	97.075	23.521	-3.5963	96.836	43.629	-2.4938
1603	Female	56.94	RS1	154.78	107.83	32.032	25.102	99.835	37.976	124.27	68.115	56.4	59.814	65.186	58	108.82	46.986	12.393	74.641	44.243	12.519	94.142	38.548	61.077	94.014	20.182	16.188	92.352	37.735	5.7051
1604	Male	56.52	RS1	159.99	101.8	39.03	17.5	103.96	26.593	118.41	54.443	47.6	53.467	55.42	40.4	108.81	37.584	3.2751	73.43	37.079	3.6818	85.02	29.185	51.266	90.502	10.88	5.8671	91.863	29.028	-1.0949
1605	Male	55.97	RS1	149.88	97.679	28.879	24.843	94.059	52.695	124.76	57.861	58	59.814	56.396	71.6	108.59	29.939	24.119	66.156	27.475	30.451	95.968	30.728	74.279	92.369	4.6433	32.591	87.688	18.737	21.196
1606	Male	57.02	RS1	154.71	104.51	30.143	26.589	105.53	31.573	121.83	61.279	46.8	57.861	62.744	46.8	107.85	41.372	8.2037	68.291	42.09	8.6143	87.602	38.605	52.281	86.864	15.558	11.506	87.388	33.255	1.4552
1607	Male	56.67	RS1	155.98	101.9	27.482	24.853	104.05	33.333	121.34	61.279	45.2	61.279	62.744	47.6	108.04	41.085	8.5962	68.098	42.877	10.06	91.217	41.406	53.557	85.973	18.086	9.8758	86.722	34.879	3.3564
1608	Female	56.7	RS1	153.5	101.25	28.315	26.04	94.997	31.529	124.27	55.42	50	60.303	53.955	52.4	107.26	34.854	8.7688	75.57	32.773	9.8458	93.028	33.266	56.632	92.96	11.514	15.064	91.949	27.825	3.5375
1609	Female	55.56	RS1	147.6	116.82	29.339	24.885	115.72	32.76	118.41	69.58	41.2	53.955	70.557	43.6	102.35	54.822	4.3611	66.898	55.674	4.7363	85.35	49.508	45.493	83.274	35.809	5.9468	83.908	49.502	0.046386
1610	Male	55.66	RS1	160.67	97.193	35.036	20.392	97.634	31.215	123.29	53.955	57.2	54.443	54.443	55.6	111.08	31.355	14.937	69.471	31.511	14.498	88.961	34.498	64.827	89.675	4.4183	22.156	89.806	23.337	9.6099
1611	Female	55.54	RS1	151.62	105.2	28.638	24.147	109.04	30.06	116.94	61.768	47.6	55.42	64.209	48.4	101.35	46.734	8.0148	67.488	47.406	8.4626	85.171	39.352	53.009	83.017	25.396	9.3015	83.538	42.07	1.6023
1612	Male	55.12	RS1	159.25	99.238	29.088	21.038	101.03	27.185	123.29	61.768	48.4	53.955	61.279	47.6	110.74	34.853	7.5524	65.583	34.9	7.1263	87.853	30.563	55.543	88.306	5.6206	11.428	88.344	25.439	2.0628
1613	Male	56.65	RS1	158.76	108.16	31.088	25.453	99.841	27.468	125.24	54.443	44.4	60.303	52.49	44.4	114.77	37.152	5.1628	75.733	33.763	4.4573	94.055	31.074	47.85	98.382	10.893	5.5635	96.429	28.824	0.27687
1614	Male	56.14	RS1	154.67	94.759	46.541	20.916	95.825	43.681	118.9	61.768	73.2	54.443	59.814	71.6	107.49	28.568	32.093	68.616	29.346	32.245	86.834	36.289	85.151	87.825	3.2095	42.562	89.039	17.063	25.713
1615	Male	56.98	RS1	152.5	105.62	23.626	29.048	89.727	30.414	124.27	58.35	39.6	65.674	51.514	45.2	114.3	37.204	5.455	76.232	32.973	7.1602	98.741	27.012	44.164	101.04	9.1712	6.1115	97.553	26.854	3.6654
1616	Female	56.83	RS1	154.07	113	33.684	30.348	113.51	28.312	121.34	72.51	51.6	61.768	72.51	47.6	109.67	53.861	12.703	77.069	53.279	10.251	91.082	48.156	55.927	94.387	31.464	18.298	94.517	47.177	8.3819
1617	Female	55.76	RS1	146.73	111.46	27.69	22.503	101.95	41.243	119.38	68.115	47.6	60.791	63.721	53.2	103.18	50.804	6.655	68.55	48.884	8.8515	91.45	43.571	52.232	88.002	28.9	8.1366	85.33	44.849	0.71644
1618	Female	55.9	RS1	152.71	96.066	38.656	23.954	95.519	28.405	119.38	55.42	54.8	52.978	55.42	49.2	109.57	37.026	12.131	69.727	35.734	9.9102	87.094	31.148	55.266	89.668	13.165	13.298	90.211	30.509	3.62
1619	Female	56.61	RS1	154.53	99.767	38.091	30.715	102.01	32.094	121.83	58.838	57.2	59.326	60.303	54	110.06	38.002	15.674	75.773	38.699	14.117	89.795	37.186	62.125	91.791	16.08	20.267	92.476	31.934	9.5213
1620	Male	56.41	RS1	159.82	97.657	41.1	30.481	92.609	25.437	124.27	52.49	58.8	62.256	50.537	52.4	113.98	32.557	16.833	79.652	30.903	13.738	91.759	27.618	65.726	96.219	5.2501	20.862	97.065	22.748	9.4711
1621	Male	55.19	RS1	159.46	101.92	33.32	16.965	106.95	31.54	123.29	58.838	46.8	55.42	59.814	46.8	107.04	42.117	5.4202	73.971	42.564	5.3397	90.222	33.872	49.395	91.734	16.37	6.9176	91.455	35.216	1.4301
1622	Male	55.4	RS1	159.86	97.346	29.427	18.734	104.5	25.695	120.36	52.002	46	54.932	54.443	43.6	105.22	32.332	6.039	69.206	33.1	5.6308	85.483	30.551	48.933	86.351	6.0872	6.7105	86.829	24.548	1.8315
1623	Female	56.61	RS1	144.53	112.88	42.085	24.801	112.07	43.857	114.5	74.463	59.6	54.443	74.951	58.8	100	54.552	23.232	65.796	54.922	23.146	83.889	51.861	66.05	83.373	33.752	26.594	82.634	48.06	18.11
1624	Male	56.73	RS1	151.78	97.816	32.59	14.748	101.16	35.671	115.97	58.838	56.4	50.537	59.814	58.8	99.986	36.27	22.987	61.595	37.67	24.126	83.153	36.679	69.948	80.776	10.369	27.372	79.934	26.792	17.775
1625	Male	56.81	RS1	154.68	107.71	42.082	20.47	100.33	43.297	123.29	68.603	67.6	56.396	64.697	70	115.19	39.29	31.231	69.365	37.151	32.385	93.195	38.861	78.566	91.811	10.402	36.804	91.629	27.536	26.449
1626	Female	55.49	RS1	148.04	94.941	24.039	21.339	98.683	24.894	114.99	55.42	44.4	51.514	56.885	45.2	98.998	39.151	5.1438	65.321	40.024	5.0785	83.791	32.559	50.195	82.848	17.926	7.5525	82.516	33.049	0.19885
1627	Male	56.15	RS1	150.67	82.729	40.474	22.069	100.42	23.4	109.62	49.072	54.8	46.631	56.885	45.2	100.04	32.237	13.178	62.566	37.764	8.8582	74.181	31.939	60.53	77.699	8.367	13.59	82.317	26.47	3.4832
1628	Male	56	RS1	164.45	112.25	36.693	20.984	108.37	32.97	127.69	66.65	52.4	58.838	64.697	50.8	114.79	47.002	11.454	72.209	44.676	10.412	93.933	38.826	58.824	95.905	19.911	13.633	94.388	39.002	4.9309
1629	Male	56.32	RS1	157.54	96.664	27.921	23.596	94.944	29.742	125.24	47.607	42	59.814	45.654	42	109.54	34.042	6.1473	75.665	35.069	5.16	93.059	23.25	47.812	91.165	9.2737	8.3709	91.401	28.702	1.4126
1630	Male	57.28	RS1	157.22	97.106	28.099	26.415	93.675	29.827	126.71	55.42	52.4	63.721	53.467	53.2	112.79	35.583	10.815	77.462	35.257	11.672	95.896	32.72	62.085	95.658	12.187	17.595	94.283	27.993	6.5182
1631	Male	56.39	RS1	146.88	99.973	24.241	25.324	106.13	32.568	114.01	61.279	37.2	55.42	63.232	44.4	98.75	44.495	7.7968	65.503	45.999	7.9569	85.534	31.904	46.702	80.081	12.881	8.9617	81.807	38.57	3.4134
1632	Male	55.29	RS1	158.8	100.82	34.19	27.504	95.521	32.939	127.2	58.838	55.6	62.744	55.908	55.6	116.87	36.362	12.074	76.649	33.156	11.584	96.396	35.003	64.181	97.744	5.0845	19.697	97.476	24.925	5.1792
1633	Female	56.31	RS1	153.22	113.28	26.619	24.79	113.85	34.128	121.34	75.928	44.4	56.885	77.881	49.2	102.2	54.599	6.9219	69.235	54.721	8.4405	89.772	48.763	52.21	87.26	30.226	12.461	85.84	46.814	2.7627
1634	Male	56.38	RS1	152.59	103.67	24.021	21.474	107.61	25.317	117.43	62.744	37.2	54.932	65.674	37.2	100.47	52.055	3.7386	66.389	51.827	5.9119	83.433	39.736	44.037	80.447	25.816	6.2945	82.671	46.109	2.8371
1635	Male	55.39	RS1	155.73	101.34	25.054	25.688	92.778	33.086	126.22	57.861	45.2	65.674	53.955	51.6	109.21	32.341	5.976	76.653	29.868	8.152	97.465	28.962	55.847	94.143	3.9265	12.033	92.312	21.68	0.77052
1636	Male	56.61	RS1	156.66	103.01	24.572	29.899	93.444	30.415	132.57	58.838	44.4	66.65	53.467	46.8	118.04	40.074	5.9187	79.902	36.894	5.323	100.9	30.058	54.358	101.3	8.1603	8.9868	99.194	30.654	0.13136
1637	Male	55.61	RS1	156.78	108.92	25.472	22.289	110.18	25.492	120.36	60.303	42.8	58.35	61.279	43.6	108.39	40.773	3.5967	70.465	41.081	4.301	90.143	35.137	46.109	89.538	13.555	5.4046	89.451	32.343	-0.89916
1638	Male	55.38	RS1	152.81	107.67	31.333	27.578	89.502	32.745	128.17	64.697	55.6	63.721	54.443	55.6	118.54	40.94	14.141	80.932	34.749	13.951	100.21	33.101	63.269	103.79	8.9683	19.047	101.47	29.497	8.305
1639	Female	56.43	RS1	152.67	105.34	40.856	30.754	99.646	31.518	121.34	69.092	58	61.768	66.65	52.4	112.73	47.316	22.69	80.599	42.987	19.107	94.923	44.306	62.757	99.939	27.081	29.885	97.874	38.545	18.082
1640	Female	55.42	RS1	148.08	107.22	35.321	21.552	113.9	41.408	111.57	67.627	53.2	53.955	71.045	54.8	96.34	51.17	16.577	61.967	53.219	18.542	81.413	47.276	56.975	77.731	29.82	20.971	77.455	46.01	12.042
1641	Male	55.37	RS1	152.76	111.6	36.254	17.85	116.24	36.272	116.46	68.603	63.6	51.025	71.045	60.4	106.37	42.943	17.718	63.596	43.172	16.346	84.703	44.259	68.976	87.853	14.474	23.836	86.234	33.997	10.321
1642	Female	56.36	RS1	154.88	107.82	26.162	28.605	105.88	31.157	122.8	64.209	45.2	60.303	63.232	46.8	109.08	46.392	5.9709	75.233	44.653	6.3362	91.672	38.434	50.245	93.981	23.325	9.8633	92.856	38.767	1.0483
1643	Female	55.62	RS1	147.71	112.39	33.857	29.936	107.4	28.892	118.9	68.115	47.6	62.256	65.674	46.8	108.94	52.796	9.55	76.217	50.833	8.7962	90.716	43.933	55.475	94.851	24.611	12.313	93.586	44.29	3.1707
1644	Male	55.18	RS1	158.69	92.358	34.596	24.427	98.454	28.488	122.8	49.561	50	57.861	51.025	46	108.21	25.857	10.803	67.8	27.403	9.3584	89.344	20.298	54.242	88.208	1.8164	10.425	87.581	18.535	2.8401
1645	Male	54.78	RS1	152.85	98.022	34.289	25.646	95.207	31.991	120.85	58.838	55.6	58.35	56.885	54	111.78	37.375	18.265	70.29	33.907	16.75	91.596	32.64	63.599	94.856	9.3425	20.211	92.22	25.828	9.2733
1646	Male	56.2	RS1	157.43	94.901	24.926	25.53	94.491	25.197	124.27	55.42	40.4	58.35	54.443	40.4	109.2	38.179	7.4792	72.578	38.127	7.0663	91.794	30.973	47.967	90.709	11.962	9.5978	90.589	30.024	3.6659
1647	Female	55.86	RS1	151.64	105.46	35.84	27.408	112.37	33.688	120.36	58.838	54	52.978	62.744	54.8	101.95	36.772	12.35	68.421	39.815	12.384	84.227	33.869	57.961	82.847	12.92	15.926	85.074	31.296	6.3174
1648	Female	56.26	RS1	157.35	102.07	29.111	23.085	98.678	33.033	123.78	54.932	47.6	54.932	55.908	49.2	106.66	40.562	8.647	70.962	39.41	8.8035	89.383	33.302	55.878	90.659	16.943	13.093	89.087	32.86	3.4936
1649	Male	55.73	RS1	161.21	97.031	34.46	33.541	93.249	21.345	131.1	55.42	53.2	69.092	53.467	44.4	126.25	35.829	10.554	88.399	33.929	7.1066	100.06	32.396	54.449	108.44	11.117	11.482	109.23	28.359	3.2554
1650	Female	55.35	RS1	150.37	98.688	30.214	25.988	103.21	37.337	121.83	56.885	45.2	54.443	59.326	50	103.73	42.968	8.9623	67.239	43.832	11.589	88.083	36.22	51.39	84.286	22.572	11.35	85.001	38.609	3.6686
1651	Male	54.85	RS1	151.86	103.03	37.463	23.385	109.28	32.978	116.94	62.256	53.2	52.002	66.162	51.6	102.86	43.083	10.487	66.925	45.442	11.801	84.473	42.051	57.344	82.906	18.613	17.293	84.759	36.423	5.4712
1652	Female	56.56	RS1	156.45	104.52	28.944	25.076	97.757	36.774	123.29	68.115	50	64.209	65.186	54	110.83	45.936	11.285	77.176	43.489	13.202	96.342	40.081	59.504	96.173	20.41	15.418	94.102	37.922	5.5625
1653	Male	56.67	RS1	150.56	102.83	29.973	23.211	110.54	28.05	116.46	60.303	40.4	50.537	64.697	38.8	100.19	42.9	5.8285	64.388	44.568	6.0166	82.248	33.38	42.256	79.947	17.581	6.877	81.892	36.029	4.472
1654	Female	56.16	RS1	155.23	115.89	20.669	28.794	96.505	30.307	129.15	67.627	35.6	67.627	59.326	41.2	116.86	52.561	5.5181	79.581	47.483	6.8051	101.46	39.99	39.358	101.11	31.888	3.1643	99.053	45.795	3.6265
1655	Male	55.32	RS1	157.13	101.15	25.021	21.346	102.3	31.218	123.78	59.814	50	58.35	59.814	52.4	108.46	40.038	7.258	70.611	40.68	8.1421	90.461	34.629	57.882	90.485	13.606	10.888	89.67	30.616	1.2139
1656	Female	55.1	RS1	141.99	118.38	30.384	24.687	120.65	33.95	113.04	80.811	48.4	52.978	82.275	51.6	95.067	63.892	11.579	64.06	65.318	14.15	83.447	56.814	55.681	79.319	42.855	14.91	79.148	59.101	6.4038
1657	Male	56.56	RS1	156.56	95.391	45.764	23.607	102.05	31.298	118.9	57.861	59.6	53.467	59.814	52.4	107.26	34.433	18.906	65.995	35.088	13.807	84.086	33.418	64.401	86.272	6.6904	21.696	87.391	26.343	9.7451
1658	Female	56.42	RS1	152.22	113.98	37.541	33.187	103.7	43.276	125.24	72.998	58.8	68.115	68.603	61.2	116.4	51.168	24.51	80.003	46.217	24.099	99.082	48.681	69.016	102.03	24.243	26.776	99.533	39.636	16.241
1659	Female	56.02	RS1	154.25	111.58	24.582	29.354	101.92	27.587	126.22	67.627	39.6	63.232	61.768	40.4	113.69	53.321	5.4466	74.647	50.212	5.9516	95.817	40.909	43.221	96.301	29.725	5.5785	94.821	46.629	2.2809
1660	Male	55.41	RS1	154.77	106.5	29.16	22.022	96.334	30.896	125.73	64.697	56.4	59.326	57.861	58	115.23	40.955	20.481	72.986	35.658	20.742	94.993	38.514	65.486	96.128	12.768	27.632	94.695	27.947	14.467
1661	Female	55.79	RS1	157.8	105.74	31.415	32.991	100.8	21.849	128.17	62.256	40.4	66.162	57.861	35.6	118.54	47.289	6.8157	84.383	44.376	5.2651	98.317	34.867	42.313	100.88	24.078	7.0176	103.28	38.82	4.1441
1662	Male	55.23	RS1	150.4	101.32	26.926	21.852	89.782	28.677	121.83	52.002	44.4	55.908	46.631	45.2	110.64	36.366	5.98	71.024	32.844	4.6838	90.984	26.203	51.839	93.314	7.6538	6.7928	91.481	27.656	-0.46766
1663	Female	54.98	RS1	154.69	108.93	23.422	28.126	95.864	24.715	127.2	68.603	34	65.186	61.768	34	113.35	55.214	5.8044	78.269	51.82	5.9169	97.233	42.002	41.195	97.979	31.81	5.1236	97.004	47.71	2.7644
1664	Female	56.01	RS1	149.44	104.83	24.01	22.775	109.98	25.646	115.48	61.768	28.4	53.955	63.232	29.2	99.801	55.039	4.9812	66.95	56.948	4.3018	83.657	40.825	33.466	83.336	37.264	3.7416	82.714	52.547	2.3184
1665	Female	55.98	RS1	148.84	100.65	46.618	28.782	89.868	48.15	121.34	59.814	62.8	63.232	55.42	63.6	110.76	37.87	23.27	77.398	34.948	23.148	94.356	34.715	71.008	96.258	10.884	28.618	94.463	28.026	16.496
1666	Male	54.95	RS1	152.87	91.249	43.616	25.729	107.28	27.056	114.01	55.908	62	47.607	63.721	53.2	99.781	30.428	22.459	62.62	35.545	17.298	76.765	34.289	69.637	77.694	8.9109	25.89	81.609	24.269	13.787
1667	Male	54.95	RS1	159.33	99.79	29.041	28.435	93.847	23.104	129.15	51.514	42.8	61.768	48.096	39.6	117.69	33.835	6.3239	80.574	31.21	4.7011	96.556	31.7	48.798	101.53	8.4462	8.3174	99.578	24.31	2.4004
1668	Female	56.42	RS1	153.29	108.14	33.701	32.424	101.21	26.804	123.78	64.209	53.2	64.697	61.279	49.2	118.03	45.139	12.492	79.72	42.54	11.693	95.036	39.724	58.998	99.393	18.183	13.768	99.768	36.634	4.2001
1669	Female	55.61	RS1	155.89	106.71	35.824	31.122	95.479	34.209	127.2	60.303	51.6	65.186	56.396	50.8	116.63	43.465	12.842	80.313	39.077	12.088	98.168	36.17	55.509	101.46	18.282	16.848	99.561	34.836	6.958
1670	Male	54.67	RS1	155.89	93.651	38.656	23.898	96.824	34.331	122.31	52.978	58	54.932	55.42	56.4	108.93	30.823	14.749	67.266	31.537	12.847	86.985	25.323	64.14	88.026	4.1789	15.691	88.203	22.279	6.7857
1671	Male	55.1	RS1	160.44	99.287	31.629	24.6	84.496	24.794	132.57	56.396	54.8	62.744	49.072	50.8	121.04	26.289	13.371	79.3	22.496	13.315	100.24	23.29	62.592	102.42	2.2991	23.52	100.79	15.718	8.3013
1672	Male	56.08	RS1	154.9	108.97	30.99	23.96	100.54	46.857	128.66	66.65	52.4	62.744	62.744	60.4	108.91	43.732	16.742	75.013	40.139	19.186	98.142	38.897	64.295	95.912	16.885	22.704	92.679	34.573	11.641
1673	Male	55.66	RS1	156.34	96.815	41.266	21.897	97.988	28.551	120.36	58.35	62	52.49	59.326	56.4	106.26	34.226	19.047	71.166	34.687	15.064	86.124	31.926	66.324	88.137	5.7412	20.761	90.044	24.781	9.5986
1674	Male	56.01	RS1	161.22	99.417	26.429	25.642	97.149	28.321	126.22	52.002	47.6	60.791	51.025	49.2	113.77	32.856	5.1105	74.696	31.401	5.8431	93.513	29.938	57.983	93.845	4.9077	8.2301	94.835	24.318	-0.60566
1675	Male	55.25	RS1	152.36	95.641	39.274	17.596	91.326	36.735	120.36	50.049	56.4	50.049	48.096	55.6	107.75	23.831	22.071	65.661	23.039	20.02	86.044	21.021	65.565	89.125	1.8106	30.21	86.825	15.717	13.522
1676	Male	55.9	RS1	159.37	103.28	25.511	23.558	102.81	21.739	126.22	52.978	38	56.885	52.002	36.4	112.59	42.093	6.9477	71.296	41.45	5.9245	91.766	27.994	39.165	91.534	20.065	8.7364	92.532	37.252	5.41
1677	Female	56.09	RS1	149.3	99.415	39.957	25.602	107.5	36.477	114.5	65.674	58	54.443	69.092	56.4	101.59	42.782	18.264	65.314	44.931	18.427	83.008	43.442	64.883	82.87	18.197	24.817	83.172	34.605	12.833
1678	Male	54.58	RS1	153.11	101.3	32.824	21.629	104.81	26.198	115.97	55.42	46	52.978	55.908	41.2	104.52	38.211	6.5484	69.567	38.716	6.0748	85.047	33.083	46.673	88.109	9.2493	8.7518	89.087	30.423	1.9065
1679	Female	55.5	RS1	155.34	107.35	30.027	29.856	99.422	35.705	124.76	73.486	46.8	66.65	71.045	50	110.96	49.305	13.089	79.271	47.285	14.729	96.595	47.536	55.217	96.096	28.357	20.455	95.185	41.922	9.6934
1680	Male	55.84	RS1	153.55	97.548	35.475	21.586	103.33	33.342	116.46	54.443	52.4	51.025	57.373	51.6	101.3	32.238	15.792	63.15	33.538	15.788	82.434	31.277	58.095	80.919	9.0197	20.937	81.402	24.191	9.8394
1681	Female	54.53	RS1	140.76	110.85	36.782	19.534	120.41	32.464	105.22	73.975	46	47.119	78.369	44.4	92.772	58.994	7.3533	59.011	61.297	7.3101	74.054	51.734	47.898	73.178	37.683	9.5908	75.069	52.985	1.8825
1682	Male	54.43	RS1	156.1	96.956	29.602	16.168	103.48	36.466	119.38	56.396	52.4	51.514	58.35	55.6	103.4	33.513	8.6258	61.043	36.107	10.141	85.366	31.726	60.433	80.871	9.2059	12.216	79.713	27.827	1.7476
1683	Female	54.77	RS1	149.66	103.3	40.437	32.214	103.15	34.203	121.34	66.162	59.6	60.791	64.697	56.4	110.84	43.465	15.743	74.941	42.943	13.944	91.124	40.025	64.325	95.085	18.239	19.702	93.891	35.048	7.5784
1684	Female	55.88	RS1	153.86	110.27	36.202	29.156	98.639	35.862	125.73	58.838	48.4	66.162	52.978	47.6	118.18	39.569	7.7771	78.365	35.906	8.3669	98.297	34.181	50.832	100.71	14.642	12.455	99.349	30.923	2.9292
1685	Female	54.78	RS1	146.23	103.65	28.271	28.319	113.66	43.838	116.94	68.603	42.8	54.443	74.951	52.4	95.519	56.667	5.5688	63.308	60.2	7.7721	83.464	46.172	47.762	77.359	37.434	5.1024	78.274	54.038	0.69974
1686	Male	55.48	RS1	155.18	102.75	29.827	31.121	97.006	36.461	124.27	59.814	51.6	67.627	57.861	54	114.68	37.118	8.657	77.617	35.462	10.77	98.414	38.27	59.569	97.621	10.083	11.858	96.638	27.668	0.77735
1687	Female	56.03	RS1	154.04	101.98	29.932	21.468	95.786	37.775	121.34	59.326	46	55.42	56.885	49.2	104.1	44.984	5.9347	70.103	43.327	7.2228	88.609	33.479	50.649	87.636	21.567	6.6797	87.091	39.14	0.50023
1688	Male	55.73	RS1	157.1	111.02	25.164	29.216	115.19	19.666	122.8	62.256	34.8	59.326	63.721	31.6	110.07	51.433	5.1726	74.88	54.226	4.204	90.127	39.948	36.214	91.339	31.089	4.1099	91.052	49.03	2.5921
1689	Male	56.02	RS1	159.62	99.376	26.712	19.375	102.55	25.362	123.29	52.978	42	54.932	53.955	41.2	104.56	36.085	6.0678	70.406	37.002	5.7519	88.017	29.495	51.14	85.532	9.3407	7.8877	86.298	28.597	0.25616
1690	Male	55.76	RS1	155.86	109.9	22.724	22.392	104.07	32.416	122.8	64.209	38	59.326	61.279	42.8	105.34	49.945	6.5437	70.244	48.522	5.3192	92.211	40.425	44.89	90.273	21.599	6.6456	88.966	42.178	2.3163
1691	Female	55.9	RS1	150.38	112.04	26.973	23.545	113.22	29.339	114.5	70.068	42.8	56.885	70.068	45.2	101.56	54.365	7.2301	67.692	53.858	8.0831	86.29	44.022	46.952	85.139	31.646	8.5417	84.889	48.498	1.9808
1692	Male	55.75	RS1	150.67	99.795	63.107	24.418	100.66	59.683	114.5	72.021	94.8	56.396	73.975	94	103.49	39.767	56.606	67.835	40.366	55.921	84.535	48.41	105.13	85.162	15.428	68.066	85.941	27.984	53.659
1693	Female	54.61	RS1	155.57	114.67	30.93	36.187	113.93	20.971	124.76	75.439	42	65.186	75.928	38	114.64	60.993	4.8565	82.628	59.955	4.132	94.421	53.372	44.494	97.209	40.507	6.0174	99.312	54.954	-0.87361
1694	Female	55.49	RS1	151.73	100.93	34.394	26.281	101.98	30.947	119.87	64.209	52.4	56.885	64.209	50.8	106.49	42.094	16.41	70.975	42.931	14.204	87.876	39.793	59.945	88.444	19.828	16.75	88.912	34.463	9.4199
1695	Male	56.09	RS1	154.19	98.619	38.111	23.807	94.614	34.081	119.87	57.373	61.2	56.396	56.885	58.8	107.84	29.831	17.398	73.023	28.284	16.225	88.418	28.163	70.292	89.7	2.6062	25.542	90.741	18.528	9.8886
1696	Male	55.09	RS1	156.91	109.78	22.975	31.761	107.35	18.044	126.71	66.162	41.2	67.139	65.674	38.8	117.38	47.814	5.6461	80.111	46.259	4.6466	98.401	43.981	49.285	100.32	22.398	6.2649	99.224	39.299	0.12289
1697	Male	56.18	RS1	157.67	106.1	27.781	18.613	110.56	19.134	115.48	64.209	46.8	52.002	67.627	40.4	101.83	38.356	7.8558	64.567	41.043	6.3478	81.285	37.42	53.191	80.04	13.868	8.2345	82.092	31.337	-0.0089237
1698	Female	54.73	RS1	151.5	120.15	21.218	25.118	109.41	27.783	122.8	72.021	28.4	61.279	67.627	34	106.62	66.823	1.6051	71.166	60.18	3.8594	93.395	47.237	30.796	91.856	42.013	-2.1622	90.874	62.929	2.1417
1699	Female	54.83	RS1	155.32	119.94	34.235	29.111	106.55	45.24	129.15	72.998	52.4	67.627	67.139	58.8	117.26	52.429	18.6	77.755	47.25	22.073	100.77	53.465	59.38	100.14	25.504	25.288	97.664	43.119	14.782
1700	Female	55.66	RS1	152.14	101.67	47.533	27.822	107.61	41.425	118.9	62.256	64.4	54.932	66.65	62	101.26	42.145	22.877	68.623	44.141	21.573	84.832	44.103	67.489	82.846	23.285	27.649	83.994	37.118	17.675
1701	Male	54.23	RS1	150.21	102.34	29.789	23.947	105.51	26.377	120.36	57.861	42.8	51.514	59.326	41.2	104.58	42.583	5.3848	68.288	42.207	5.068	85.052	33.66	47.355	86.396	15.83	6.984	86.363	34.631	1.6419
1702	Female	55.72	RS1	151.4	107.38	30.008	29.125	93.082	36.676	123.78	63.721	46.8	65.674	58.838	51.6	110.61	51.637	7.8594	79.069	47.714	9.1355	96.608	41.305	51.519	97.747	26.922	9.8899	95.375	43.94	2.1677
1703	Female	55.31	RS1	155.1	117.06	34.539	24.599	106.47	36.257	127.2	68.115	49.2	62.256	64.697	51.6	113.22	48.806	11.434	77.436	45.199	11.128	97.405	41.133	55.288	98.578	21.946	14.34	96.317	39.489	5.6335
1704	Female	55.64	RS1	153.87	106.77	25.985	29.496	101.36	26.928	125.24	69.092	45.2	62.744	66.162	45.2	111.97	47.608	7.745	78.309	44.959	8.102	95.267	44.65	47.157	96.774	28.224	10.608	96.172	41.048	2.9127
1705	Female	54.99	RS1	148.08	121.23	17.678	23.078	111.08	33.347	123.29	77.881	38	58.838	72.998	47.6	105.82	55.115	4.9542	67.34	52.233	7.1196	92.014	47.853	42.359	88.355	29.628	7.4866	85.834	46.066	0.76949
1706	Male	55.97	RS1	162.32	98.754	27.841	22.7	101.55	31.385	127.2	61.279	51.6	58.838	62.256	53.2	110.58	35.832	9.2054	71.763	36.789	8.9394	93.545	32.832	57.811	91.178	9.0586	14.18	90.235	27.239	3.4685
1707	Female	54.88	RS1	151.8	101.59	35.135	24.914	92.225	41.843	122.31	63.721	63.6	58.838	60.303	66.8	109.04	34.612	32.829	73.515	31.768	32.55	91.954	34.257	75.222	93.349	8.3923	38.621	92.138	24.344	27.409
1708	Male	54.24	RS1	152.81	91.043	37.251	24.596	91.538	37.778	123.29	49.072	59.6	56.885	49.072	60.4	108.66	28.705	18.555	69.537	27.849	17.199	90.58	25.344	72.464	90.725	2.5181	25.563	89.02	19.539	12.995
1709	Female	54.06	RS1	151.38	111.33	33.732	29.996	99.889	37.728	120.36	69.092	49.2	66.162	65.674	52.4	110.18	47.618	9.3548	78.863	44.539	10.391	95.29	43.716	55.452	95.656	24.128	15.05	93.954	38.851	4.1011
1710	Female	55.94	RS1	148.37	119.1	27.542	27.427	109.18	36.707	122.31	74.463	41.2	61.768	70.557	46.8	105.11	59.053	5.8778	74.734	57.279	6.2238	93.962	51.004	47.12	91.157	35.297	7.6585	89.745	52.217	2.3724
1711	Female	55.31	RS1	152.73	98.197	33.969	25.109	100.27	38.411	119.87	59.326	60.4	58.838	60.303	62	106.07	36.806	25.034	72.302	36.953	25.862	90.222	38.917	71.958	90.649	14.407	32.691	89.765	29.041	20.725
1712	Female	55.11	RS1	156.61	101.93	42.896	35.958	94.217	42.247	128.17	66.162	67.6	69.58	63.721	67.6	115.37	41.227	30.841	84.938	41.188	31.547	100.08	43.311	75.944	97.146	17.595	39.859	98.911	32.625	26.448
1713	Male	55.92	RS1	149.06	97.659	43.24	15.612	115.07	41.508	108.15	57.861	65.2	42.236	65.186	64.4	90.631	38.751	21.475	53.273	43.83	21.069	71.488	38.509	67.116	69.546	20.181	26.181	71.704	34.89	15.933
1714	Male	54.56	RS1	156.07	95.802	41.147	18.203	97.988	36.891	121.34	58.838	62	54.932	58.838	62	105.82	38.365	17.592	69.226	38.868	17.207	88.357	33.627	68.686	85.4	11.189	22.358	86.072	29.61	10.88
1715	Male	55.9	RS1	158.31	104.42	31.803	18.946	103.12	38.208	124.76	62.744	59.6	56.396	61.768	62.8	110.68	33.643	23.429	66.58	31.015	24.325	90.949	35.613	67.77	90.725	8.6336	31.933	89.349	23.43	17.759
1716	Female	55.59	RS1	146.22	114.8	31.909	32.99	112.21	29.088	118.9	70.557	39.6	62.256	68.603	38	109.73	57.99	6.1045	73.692	55.978	5.2294	91.765	49.454	43.049	93.887	33.939	6.1877	92.125	50.598	1.5374
1717	Female	56.23	RS1	161.01	101.89	34	31.92	94.726	31.571	128.66	60.303	54.8	69.092	57.373	54	116.23	36.812	15.925	83.16	35.366	14.722	99.617	35.956	60.102	100.49	12.506	20.839	99.869	28.212	9.8724
1718	Female	54.17	RS1	158.11	103.1	35.464	33.372	104.74	25.303	126.71	61.279	47.6	65.186	61.768	41.2	115.57	40.916	10.458	80.111	41.22	7.7424	96.309	36.313	49.117	96.948	17.955	10.554	97.559	35.217	3.1989
1719	Male	54.47	RS1	153.77	99.141	23.891	23.096	106.17	26.343	123.29	58.35	42.8	55.908	60.303	45.2	105.69	38.832	4.4812	66.163	40.436	5.7454	87.545	31.829	51.096	82.965	12.905	6.7236	84.731	31.598	-0.28881
1720	Female	55.87	RS1	144.24	112.06	29.383	18.845	112.37	30.836	113.04	72.021	39.6	50.049	71.533	40.4	95.497	58.798	5.4685	63.556	58.48	6.0232	80.032	46.767	42.492	77.544	35.018	7.2777	78.259	52.059	3.0879
1721	Female	54.73	RS1	147.97	121.78	27.508	20.541	122.54	34.297	114.5	79.834	36.4	52.978	78.857	41.2	100.29	64.354	3.243	61.182	65.956	3.52	83.353	52.07	40.431	81.399	44.326	2.7647	80.045	59.37	-0.87796
1722	Male	55.95	RS1	153.89	99.807	29.186	20.864	103.62	24.276	117.92	58.35	47.6	53.467	61.768	44.4	107.36	38.902	11.261	65.309	40.408	9.4592	84.898	36.952	53.818	85.198	11.063	13.811	86.06	29.714	3.6865
1723	Male	54.79	RS1	150.83	88.236	37.903	21.902	92.32	43.419	114.99	50.049	68.4	54.443	53.467	71.6	102.19	25.925	35.089	62.2	28.52	36.298	85.265	31.676	81.619	81.446	5.2978	42.308	81.264	17.859	29.96
1724	Male	55.42	RS1	150.59	94.956	27.075	13.809	104.75	44.236	114.99	60.791	54	49.561	65.186	63.6	95.489	42.433	11.186	58.945	44.025	17.009	82.159	36.697	66.082	76.043	14.449	19.377	76.723	33.304	7.5739
1725	Male	54.55	RS1	154.69	95.307	18.436	14.855	95.216	22.84	117.92	52.978	40.4	51.514	52.002	42	101.24	33.211	5.3631	63.349	33.188	5.7691	84.411	29.393	50.322	81.085	9.5124	6.6669	82.152	26.812	2.4383
1726	Male	55.03	RS1	153.7	100.61	38.016	23.938	101.79	39.691	118.9	56.396	54	54.932	59.326	53.2	104.46	40.498	12.584	65.744	42.73	11.534	86.436	36.327	59.46	83.648	17.525	17.774	84.615	34.748	6.8189
1727	Male	54.72	RS1	158.93	108.5	28.652	20.264	108.51	30.89	119.87	63.721	42.8	56.396	65.674	45.2	103.79	47.569	7.0186	65.618	49.945	8.6435	88.852	42.832	52.722	84.647	22.784	10.965	84.593	41.335	0.78391
1728	Female	55.76	RS1	154.67	112.93	32.768	22.212	111.27	32.807	123.78	70.557	47.6	55.42	68.603	48.4	105.3	53.674	4.9662	70.554	53.406	4.7047	89.391	45.957	54.77	89.381	28.344	8.3685	87.309	46.686	-0.63206
1729	Male	55.11	RS1	161.8	101.34	32.996	19.357	95.238	37.306	129.64	60.303	59.6	56.885	53.955	61.2	114.27	33.318	19.406	71.884	30.198	19.707	94.662	30.644	70.667	95.63	5.7224	27.27	93.62	22.729	13.694
1730	Male	55.15	RS1	155.82	106.23	30.889	26.613	108.79	26.953	124.76	59.326	50.8	55.42	60.303	49.2	111.8	40.106	6.831	72.315	40.448	6.9797	89.98	31.108	55.625	92.51	12.577	7.7404	93.177	31.782	1.0358
1731	Female	54.32	RS1	151.4	102.03	38.002	29.455	102.72	28.89	120.85	58.838	52.4	56.885	58.838	48.4	107.47	40.458	11.779	73.784	40.746	11.56	88.076	36.724	56.24	90.01	18.422	14.63	90.744	34.337	6.1102
1732	Male	54.05	RS1	158.88	103.25	29.221	23.384	93.103	23.932	129.64	54.443	41.2	60.303	49.072	36.4	114.21	35.028	5.6177	76.953	31.7	4.8844	94.815	24.485	40.599	94.749	10.309	4.3792	96.872	26.119	2.9419
1733	Male	55.01	RS1	158.53	111.51	22.044	22.878	105.52	19.956	128.66	64.209	26.8	59.326	59.326	26.8	112.52	53.144	4.6094	77.936	51.405	4.1281	96.002	37.991	30.111	97.031	27.83	5.1369	94.945	48.316	3.0181
1734	Male	54.75	RS1	153.59	103.86	24.174	20.005	109.82	23.532	116.94	56.885	37.2	51.025	58.35	38	100.78	41.931	4.0971	63.905	43.089	4.5711	82.72	33.53	43.603	82.375	14.117	6.1576	82.44	34.407	1.8776
1735	Female	54.62	RS1	157.47	106	38.074	30.681	94.481	37.318	124.76	65.186	59.6	65.186	58.838	58.8	112.15	36.661	22.853	78.94	34.663	23.412	96.594	39.446	70.656	94.656	10.399	34.777	95.192	25.828	18.809
1736	Female	55.61	RS1	146.2	100.75	29.541	26.364	109.54	31.226	114.01	61.768	46.8	52.002	64.697	47.6	96.891	47.075	7.9763	65.453	50.355	8.6715	82.139	43.407	53.62	79.437	28.049	13.198	80.507	42.249	3.4386
1737	Female	54.73	RS1	149.91	108.82	32.083	24.178	113.23	34.596	118.9	70.068	53.2	53.955	71.533	54	102.24	47.397	18.034	66.744	48.792	18.561	86.443	45.961	59.257	84.452	26.351	23.161	84.188	41.025	13.094
1738	Male	54.01	RS1	157.47	105.8	26.968	18.482	105	32.169	124.76	57.861	46	54.443	57.373	48.4	110.79	39.154	7.0209	64.164	38.646	7.6393	90.698	34.902	54.243	87.068	12.895	13.681	87.011	31.193	1.9182
1739	Male	54.42	RS1	154.83	100.34	35.172	25.079	91.976	39.018	125.24	55.908	62.8	60.303	51.025	66	113.72	28.444	23.117	73.813	26.61	24.706	96.291	29.598	73.825	96.157	2.2697	32.209	93.49	17.675	19.437
1740	Male	54.96	RS1	162.37	97.145	31.849	32.043	87.222	25.092	130.62	47.119	46	66.162	42.725	42.8	117.06	35.299	7.9297	82.829	33.165	6.6297	98.395	19.152	49.403	100.03	7.589	8.4913	101.12	27.691	3.8457
1741	Male	54.98	RS1	166.07	97.324	36.619	29.739	86.773	28.025	130.62	58.838	61.2	64.209	55.908	57.2	119.15	31.558	21.183	80.883	29.091	22.215	97.708	30.194	71.937	97.032	2.5119	32.384	100.39	19.48	17.323
1742	Female	55.02	RS1	151.54	108.82	27.957	24.053	108.64	33.487	117.92	64.697	43.6	57.373	66.162	46.8	103.73	50.946	5.7816	67.331	50.893	7.3365	88.172	41.703	49.861	84.75	27.005	8.498	85.331	43.18	0.1754
1743	Male	54.35	RS1	158	108.81	21.436	27.03	101.59	29.651	133.54	65.186	44.4	67.139	61.768	47.6	120.21	44.555	6.2451	79.297	43.051	7.8511	102.91	38.431	53.134	100.23	15.099	9.8815	100.23	36.097	1.6339
1744	Female	54.96	RS1	155.34	102.99	33.006	24.627	103.55	30.958	122.31	62.744	46.8	60.303	61.768	46.8	111.57	41.738	11.602	73.403	39.844	10.132	91.16	37.834	49.948	92.58	20.381	12.088	93.206	35.238	3.7061
1745	Male	55.39	RS1	154.57	102.91	30.685	21.027	105.43	34.219	119.87	54.932	46.8	55.42	56.885	50	106.76	35.756	9.067	63.112	38.216	11.47	86.339	28.984	54.255	83.317	7.4484	13.428	83.693	28.854	3.2155
1746	Female	54.65	RS1	156.45	100.26	32.473	28.906	101.83	26.75	120.85	54.443	42.8	63.721	62.256	40.4	109.99	39.89	7.795	77.036	50.023	12.436	92.191	34.599	41.923	93.162	18.261	5.7097	94.104	36.762	6.3237
1747	Female	55.84	RS1	150.54	99.234	37.341	23.158	106.07	34.08	114.99	57.373	53.2	51.514	62.256	50.8	101.17	39.596	12.162	64.947	41.305	10.895	81.74	39.406	58.809	83.206	18.081	16.753	83.344	32.22	6.9807
1748	Female	53.73	RS1	151.55	100.87	33.28	29.893	103.31	27.742	119.38	56.885	45.2	60.303	55.908	42.8	107.68	42.042	6.9895	74.008	42.224	6.1817	89.663	37.475	49.132	90.203	19.086	9.1738	91.423	34.658	0.064459
1749	Male	55.08	RS1	154.72	110.9	29.895	24.747	105.45	36.48	127.2	64.697	49.2	58.838	63.232	54	110.34	46.431	11.504	68.535	43.626	13.55	93.075	42.935	60.767	90.545	21.59	18.714	89.381	38.454	8.983
1750	Female	55.31	RS1	151.7	121.47	40.437	31.573	118.48	37.719	121.83	82.764	56.4	63.232	80.811	55.6	109.48	63.325	20.991	79.07	61.878	19.76	93.247	56.883	60.724	95.493	38.699	25.599	95.383	55.851	14.88
1751	Female	55.3	RS1	151.1	100.77	35.807	29.183	106.34	36.804	120.36	57.373	49.2	57.861	58.838	50	107.37	37.086	10.285	70.781	38.403	11.429	88.16	35.857	54.646	87.225	9.2417	14.78	88.765	28.763	5.3052
1752	Female	55.09	RS1	152.19	112.56	23.512	30.486	106.85	22.209	122.8	65.674	29.2	63.232	63.232	29.2	112.69	55.497	1.1885	75.377	53.821	1.7382	94.76	37.649	31.686	96.607	31.081	1.1831	93.615	52.207	0.35187
1753	Female	53.86	RS1	151.4	114.54	35.74	21.049	111.88	33.487	117.43	68.115	46.8	55.42	66.65	46.8	105.57	54.733	9.6527	69.668	53.633	9.12	86.542	44.615	49.178	87.07	32.917	10.41	87.539	49.912	3.5694
1754	Female	55.15	RS1	152.14	105.32	23.418	22.448	104.81	23.114	120.36	61.768	31.6	55.908	59.814	32.4	106.41	46.307	3.8436	70.61	46.256	4.2414	88.404	33.579	33.609	89.582	24.056	3.6514	89.402	42.412	2.6731
1755	Female	55.25	RS1	157.64	123.97	36.183	34.086	104.92	32.099	128.66	84.228	56.4	69.58	76.416	54.8	120.91	57.172	18.419	85.871	53.221	17.725	101.95	56.808	63.273	104.5	31.196	23.055	103.52	45.96	12.309
1756	Female	54.87	RS1	150.87	104.52	36.031	28.617	115.12	26.057	114.5	66.162	43.6	58.35	70.557	38.8	105.88	53.054	4.2568	72.018	57.058	4.7974	83.112	45.084	45.784	87.659	31.482	6.0691	89.644	48.257	-0.049215
1757	Female	54.83	RS1	151.75	106.7	31.991	25.602	114.22	30.448	117.92	64.209	40.4	55.42	68.115	39.6	102.33	49.353	5.1233	69.388	52.162	4.6862	86.129	41.198	41.506	86.45	27.74	4.6896	86.752	43.044	2.8536
1758	Female	55.38	RS1	148.04	112.75	27.494	29.45	110.06	27.739	117.43	68.603	38	60.303	67.139	40.4	102.89	52.07	6.6601	70.51	51.163	5.6332	89.106	42.944	40.894	84.502	28.283	5.3451	85.186	43.477	4.3434
1759	Female	54.68	RS1	150.86	101.62	33.379	23.626	97.499	34.87	119.38	57.373	54.8	58.838	55.42	56.4	107.27	38.401	12.41	69.85	36.749	12.537	89.603	35.438	59.846	89.844	14.112	21.762	88.982	30.325	8.0222
1760	Male	54.12	RS1	158.84	103.41	30.258	23.635	95.266	45.392	129.64	62.256	59.6	64.209	58.838	66.8	110.02	35.965	25.057	74.726	34.399	29.395	98.136	31.383	74.416	93.269	6.3713	34.573	91.399	24.952	22.648
1761	Female	54.16	RS1	154.89	109.37	28.472	32.346	96.049	30.085	126.71	68.603	44.4	67.627	61.279	47.6	117.92	48.509	7.0286	84.598	43.326	7.328	100.65	40.766	51.227	104.04	24.946	8.127	102.11	40.56	-0.098668
1762	Female	55.52	RS1	158.43	103.39	39.374	24.022	102.14	38.259	125.24	53.955	60.4	57.861	54.443	58	108.59	34.497	21.635	74.459	35.166	20.928	91.319	33.055	66.056	90.642	11.889	25.141	91.062	29.405	14.867
1763	Female	54.06	RS1	147.47	110.95	32.972	30.722	119.06	25.606	114.01	71.045	42	56.396	73.486	38.8	102.36	59.995	6.3894	71.152	62.672	4.9484	84.679	50.014	44.725	86.73	40.525	7.1108	87.299	55.835	1.4578
1764	Male	54.38	RS1	157.8	105.05	29.64	29.338	97.806	27.865	127.2	64.209	46.8	66.162	60.791	46.8	114.62	45.211	7.9097	80.543	42.793	7.5466	98.739	37.168	53.612	100.5	14.961	12.435	98.431	35.497	2.5592
1765	Female	53.76	RS1	151.94	121.75	31.349	29.025	123.72	25.023	120.36	76.416	43.6	58.35	78.369	40.4	105.62	58.405	4.9553	74.459	59.675	4.8979	89.121	56.509	46.994	91.025	37.522	7.0796	90.606	51.578	1.428
1766	Female	54.49	RS1	148.95	111.34	33.799	20.284	117.97	39.705	113.53	79.346	59.6	53.955	83.74	62	98.223	51.198	20.085	61.863	53.097	21.732	83.154	52.227	66.922	81.028	28.183	27.569	79.952	44.366	15.681
1767	Male	55.41	RS1	152.91	95.981	38.16	17.05	97.244	42.544	118.9	55.908	68.4	52.002	56.396	70	104.12	27.64	32.742	62.856	28.974	32.848	86.579	32.684	82.851	85.554	3.6312	42.842	83.208	16.951	27.866
1768	Female	55.33	RS1	151.85	111.67	31.316	27.247	109.96	26.242	122.31	76.416	45.2	57.861	74.951	42	108.96	60.123	6.6104	73.589	59.101	6.1158	90.316	49.529	48.688	91.648	35.178	9.7543	91.385	52.807	0.97872
1769	Male	54.08	RS1	150.21	96.362	30.423	19.168	91.081	40.902	115.97	56.396	54	53.955	55.42	60.4	102.96	34.135	13.028	64.17	30.551	13.939	86.866	30.061	63.946	85.918	9.515	17.051	84.232	25.427	7.0899
1770	Male	53.51	RS1	157.47	103.35	40.298	25.497	93.232	34.166	124.76	57.373	61.2	61.768	52.49	58.8	117.08	31.476	20.399	77.535	28.576	18.186	94.861	29.27	68.201	97.351	4.8411	25.233	98.094	20.485	13.437
1771	Female	54.03	RS1	144.88	104.43	26.249	23.184	110.8	29.744	115.97	61.768	45.2	47.119	65.674	46.8	97.027	46.105	6.9018	63.88	47.791	7.2456	80.684	42.132	52.693	79.314	25.122	7.6874	80.541	40.341	0.39605
1772	Female	55.25	RS1	153.59	106.02	37.758	23.799	108.86	46.623	121.83	64.697	64.4	53.467	68.603	69.2	102.09	45.65	26.701	65.738	47.76	29.583	88.331	45.432	72.068	81.873	25.699	33.242	83.356	39.982	21.509
1773	Female	53.48	RS1	154.1	114.59	26.874	27.668	102.97	34.762	126.71	67.139	44.4	64.209	62.256	48.4	111.63	50.47	8.8093	77.611	47.592	8.7808	97.113	41.02	50.838	97.289	27.198	9.1651	95.357	42.426	3.1952
1774	Male	55.46	RS1	159.67	110.65	30.553	24.128	94.523	32.642	127.69	70.068	49.2	63.232	62.744	50.8	116.12	44.438	5.9297	79.558	39.536	6.3417	99.699	33.518	55.121	99.584	11.737	8.6989	98.237	33.802	0.04592
1775	Male	54.73	RS1	153.79	93.253	25.322	23.756	97.356	28.932	121.83	56.396	50.8	55.42	60.791	51.6	103.85	33.246	12.508	68.139	34.663	12.316	87.762	30.593	58.864	86.17	7.83	21.544	85.465	23.865	10.082
1776	Male	54.94	RS1	158.7	94.783	27.867	22.221	101.11	29.304	119.87	53.955	38	57.861	55.42	39.6	105.2	38.499	9.2127	69.818	41.119	7.7964	88.583	31.587	47.03	86.915	14.598	8.9215	86.463	33.512	5.4901
1777	Male	54.23	RS1	148.11	95.717	34.406	21.068	99.219	35.371	114.5	56.885	61.2	50.049	59.326	63.6	100.89	35.862	21.562	60.627	37.1	20.428	81.596	38.484	75.144	81.163	8.6764	29.071	79.952	25.673	13.767
1778	Female	54.49	RS1	157.32	101.7	34.404	27.098	93.496	33.126	125.24	60.303	62	64.209	56.396	61.2	117.27	34.111	29.292	76.843	31.308	28.09	95.871	39.193	69.256	100.15	13.808	37.151	98.26	26.933	25.15
1779	Female	54.58	RS1	161.4	101.81	37.305	31.525	97.651	30.433	131.59	55.42	51.6	61.768	55.42	48.4	117.35	36.053	12.421	81.761	34.585	9.3961	97.831	32.081	53.504	100.9	13.243	13.352	100.06	28.951	4.7316
1780	Female	54.41	RS1	156.33	114.93	33.51	25.316	107.84	32.967	127.2	72.021	54	59.326	67.139	53.2	112.45	49.608	11.401	77.205	47.227	10.562	94.5	45.401	59.127	96.68	25.198	14.888	96.128	42.638	4.3843
1781	Male	54.91	RS1	147.44	95.007	40.093	23.23	99.041	32.329	116.46	57.861	58.8	51.025	59.326	56.4	105.37	32.136	15.439	70.885	32.483	13.526	84.205	34.889	66.335	91.248	5.1937	23.27	91.14	22.667	9.0755
1782	Female	54.64	RS1	150.45	108.42	34.209	25.176	111.69	37.114	119.38	71.045	49.2	55.42	72.021	50.8	103.57	53.69	7.9416	68.696	53.29	8.9046	87.66	47.532	50.145	87.004	27.494	12.426	85.7	46.076	2.5562
1783	Female	53.36	RS1	148.01	101.93	25.621	30.713	103.65	23.256	120.85	58.35	38	59.326	58.35	35.6	108.03	44.685	4.2728	73.672	45.31	4.609	90.364	34.275	37.561	90.354	21.163	4.4545	90.624	39.276	2.4227
1784	Female	55.5	RS1	149.14	106.31	43.968	25.932	103.17	39.043	116.46	68.115	60.4	57.373	71.045	59.6	106.28	46.388	18.264	70.463	45.16	17.989	86.82	45.002	65.647	89.815	25.565	22.513	89.02	39.365	12.16
1785	Female	53.75	RS1	152.07	110.89	29.602	30.183	105.52	30.052	121.83	71.045	38	64.209	68.603	38	111.45	58.445	5.2309	78.008	56.74	4.8711	95.352	45.299	41.141	96.007	36.289	5.6124	95.581	51.468	2.8587
1786	Male	55.18	RS1	159.88	110.65	30.516	25.981	100.56	27.527	129.15	63.232	50	62.744	58.35	49.2	118.42	39.627	8.0318	79.822	36.583	7.6912	98.049	33.1	54.756	99.495	11.746	10.962	99.582	30.245	1.313
1787	Male	55.18	RS1	150.38	101.23	27.469	22.789	101.61	23.542	117.43	51.514	47.6	53.467	51.514	43.6	104.39	32.925	7.2482	69.21	31.754	5.8748	85.678	26.224	53.517	87.513	5.2549	9.3262	88.178	24.637	0.98136
1788	Male	53.62	RS1	153.84	99.088	27.465	22.412	93.199	31.642	123.29	53.467	47.6	56.396	50.049	50	105.16	34.165	6.3483	68.537	31.596	8.16	89.913	28.907	57.669	87.396	4.4005	10.5	85.622	24.232	0.51848
1789	Male	53.87	RS1	163.45	98.306	26.351	23.239	96.811	21.682	126.22	50.537	39.6	57.861	52.002	35.6	111.15	31.919	7.0946	72.626	32.887	6.9431	92.043	28.157	42.938	91.405	9.7182	6.9184	92.25	24.604	4.6377
1790	Male	53.8	RS1	151.07	100.84	28.047	18.924	100.35	37.138	118.9	63.721	52.4	54.932	64.209	58	102.65	37.757	15.562	64.344	38.543	19.65	88.659	38.698	65.372	84.712	13.323	24.562	83.35	28.626	11.738
1791	Female	54.45	RS1	143	103.34	31.097	20.722	117.85	32.593	109.13	63.232	44.4	45.166	71.045	46.8	90.349	51.29	5.1868	59.831	55.757	5.5052	74.201	43.001	47.321	71.351	31.244	6.1522	73.822	48.095	0.59809
1792	Male	54.18	RS1	158.84	102.1	38.136	24.969	101.45	36.268	129.15	60.791	63.6	58.35	58.838	62.8	115.4	35.844	21.979	73.815	36.236	21.629	95.118	35.716	73.572	92.565	7.0533	30.127	94.039	25.492	16.531
1793	Female	54.75	RS1	157.84	102.78	22.315	26.978	108.93	20.34	120.85	61.768	38	59.814	60.791	36.4	110.04	42.836	5.7294	73.243	44.555	5.1715	90.237	36.047	41.094	88.542	21.297	5.2854	91.241	36.315	3.1377
1794	Male	54.53	RS1	155.46	97.604	32.392	28.541	97.916	35.707	126.22	55.908	50	60.303	56.396	51.6	113.08	37.77	6.6171	73.507	37.505	7.8031	93.491	31.58	55.186	95.677	11.637	8.7487	93.798	30.07	-0.1854
1795	Female	55.22	RS1	155.1	101.23	29.552	37.375	88.89	29.604	129.15	54.443	42	70.557	48.584	42.8	116.96	45.293	5.1407	83.546	41.095	5.1729	102.15	28.592	48.782	102.44	16.236	8.4479	100.52	36.837	2.7294
1796	Female	55.16	RS1	153.04	106.52	34.875	26.302	105.1	34.056	119.38	69.092	58	59.814	68.603	58.8	108.28	42.64	23.054	73.301	41.712	23.343	90.643	46.274	68.293	91.328	18.511	29.926	91.306	33.54	16.988
1797	Male	54.98	RS1	150.57	98.832	48.113	16.119	107.69	50.961	116.46	66.162	79.6	48.584	72.021	82	98.646	35.795	46.229	65.011	36.305	43.334	80.993	45.278	95.626	86.409	9.4787	54.995	83.654	26.54	40.158
1798	Female	54.88	RS1	153.61	105.34	34.781	28.765	106.34	29.752	120.85	63.721	49.2	56.885	65.186	46.8	107.49	41.029	11.852	73.691	43.25	11.076	89.362	40.333	53.223	90.759	16.976	15.886	91.954	33.474	5.6574
1799	Female	54.39	RS1	164.07	110.66	21.085	25.309	105.99	20.554	128.66	64.209	38.8	64.697	62.744	39.6	113.8	49.9	6.2263	77.401	49.637	5.6671	97.234	39.813	42.725	97.867	28.242	5.4586	96.421	43.656	3.4985
1800	Male	54.43	RS1	156.57	93.799	37.779	22.343	88.102	39.833	120.85	52.49	59.6	56.396	50.537	61.2	107.22	24.578	27.75	66.262	23.875	27.572	89.282	27.32	67.371	87.958	3.4453	35.647	86.193	12.951	22.887
1801	Female	53.69	RS1	142.31	92.853	35.14	23.614	109.19	35.974	107.18	59.814	47.6	48.584	67.139	49.2	92.06	45.209	6.3955	57.972	48.75	7.049	74.922	39.516	50.124	74.635	24.456	6.6551	74.687	41.581	0.13186
1802	Female	54.3	RS1	152.56	104.32	43.599	32.866	96.443	41.081	126.22	65.674	61.2	62.744	60.303	58	110.85	47.186	21.319	79.231	44.751	19.385	95.862	37.837	64.717	96.43	21.657	20.447	94.836	39.521	13.304
1803	Female	54.76	RS1	146.92	102.82	17.097	24.903	107.34	16.622	114.99	58.838	33.2	52.49	61.768	32.4	100.02	47.052	4.1764	65.902	49.105	4.0783	82.427	37.803	37.762	79.094	29.272	4.1885	82.494	44.533	0.47742
1804	Female	54.21	RS1	151.34	104.79	27.464	28.607	101.31	33.726	123.29	58.35	43.6	60.791	58.838	50	106.32	41.23	8.4784	71.45	40.559	11.37	92.903	35.777	49.698	89.494	19.002	11.373	89.148	35	4.1005
1805	Female	53.28	RS1	152.08	102.93	32.327	23.444	101.12	23.862	119.38	61.768	51.6	53.467	62.256	47.6	108.2	44.695	10.786	70.219	44.253	6.7572	86.701	38.048	57.491	90.266	18.671	11.991	90.581	36.336	1.7313
1806	Female	55.11	RS1	151.86	133.23	23.169	29.12	129.53	25.566	122.31	87.646	30	62.256	85.205	31.6	108.24	79.155	3.1777	75.073	78.353	3.3412	93.713	59.757	30.963	92.615	57.697	0.6616	92.398	76.531	0.53321
1807	Female	54.04	RS1	151.5	115.67	24.717	23.032	111.43	31.364	121.34	70.557	42.8	56.885	68.603	47.6	106.64	54.827	5.3487	69.584	52.385	6.7739	90.422	48.377	48.181	90.107	33.351	8.2374	88.06	49.471	0.58842
1808	Male	54.24	RS1	163.24	115.45	20.601	26.117	111.93	17.61	129.15	65.674	30.8	62.256	65.186	28.4	115.22	54.012	2.0904	79.698	53.938	1.3784	97.306	38.712	30.954	99.116	28.216	-2.3243	99.096	49.487	-0.78058
1809	Male	54.47	RS1	153.36	110.01	20.853	20.839	106.96	20.631	121.34	57.373	29.2	55.42	55.42	28.4	105.24	46.424	6.449	74.209	44.313	4.6316	90.19	30.38	32.649	91.248	21.666	5.1393	90.483	41.505	4.2068
1810	Female	54.68	RS1	151.47	100.23	42.426	23.718	99.297	43.867	119.87	61.279	61.2	58.838	59.814	63.6	107.92	37.868	20.288	68.329	36.963	21.278	90.613	36.154	69.94	88.487	12.884	26.129	87.694	30.066	13.819
1811	Male	55.07	RS1	152.71	106.47	28.917	22.021	104.69	30.264	123.29	60.303	42.8	51.514	58.838	42	109.18	45.236	6.9097	64.536	43.745	7.3418	87.597	43.437	50.103	87.157	27.288	8.6901	86.792	40.189	1.4389
1812	Male	53.56	RS1	157	107.48	24.45	21.975	114.4	20.488	122.8	60.791	40.4	50.537	63.232	37.2	106.28	44.556	5.6892	66.257	47.211	4.9977	85.114	37.636	42.2	84.442	22.2	4.9089	86.962	39.935	1.8515
1813	Male	54.09	RS1	147.71	103	27.726	21.786	99.394	29.023	115.97	59.814	46.8	52.49	58.838	47.6	104.66	33.022	12.593	61.334	32.488	14.744	84.475	33.408	58.039	82.707	5.2082	21.085	82.611	21.489	7.5042
1814	Female	53.72	RS1	152.22	107.11	31.983	29.118	96.774	30.151	124.27	68.115	51.6	63.232	62.744	50	113.38	45.63	18.6	79.839	43.178	18.116	95.629	42.383	55.862	97.878	25.173	23.813	96.741	37.129	13.306
1815	Female	55.02	RS1	140.72	118.23	25.25	19.818	119.87	43.181	111.08	81.787	49.2	53.467	84.228	58.8	95.946	62.609	15.132	59.394	63.152	20.67	82.81	61.141	57.683	77.941	43.723	20.795	76.484	57.075	11.227
1816	Male	53.93	RS1	164.06	95.477	49.742	22.396	91.888	40.659	128.17	56.885	73.2	59.814	54.932	66.8	113.23	30.569	33.391	75.601	28.518	28.744	93.448	31.198	79.565	94.321	7.2356	42.026	94.98	21.427	27.579
1817	Female	54.78	RS1	158.1	113.27	29.557	27.907	109.42	29.243	129.64	68.603	40.4	59.326	68.115	41.2	113.31	54.066	5.7554	72.998	53.488	6.3292	94.508	44.182	43.127	94.436	31.278	6.4635	94.809	47.596	3.7963
1818	Male	54.68	RS1	155.03	118.61	28.842	31.218	108.21	32.403	126.71	69.58	46.8	66.162	64.697	50	116.79	47.792	6.1343	80.384	45.092	7.1401	99.143	34.183	52.159	99.705	14.351	9.2016	99.497	37.636	0.95175
1819	Female	54.29	RS1	153.06	117.01	28.831	29.205	110.02	18.251	122.31	74.463	37.2	59.814	71.533	30	112.11	65.855	5.5718	77.13	64.027	2.7075	91.208	47.77	34.027	94.734	43.752	2.4855	94.629	62.592	1.5951
1820	Male	54.85	RS1	156.57	96.31	32.242	18.447	100.61	36.402	118.41	56.885	55.6	53.955	58.35	59.6	100.25	32.457	10.757	59.278	33.372	12.458	85.335	30.838	63.977	79.769	5.1883	15.542	78.495	23.242	4.7516
1821	Male	53.22	RS1	155.49	95.155	31.527	14.898	95.03	38.596	119.38	54.443	55.6	52.49	53.467	58	106.38	29.527	18.944	64.309	28.484	21.076	86.588	29.595	64.023	87.409	6.1604	26.943	85.55	21.873	14.322
1822	Male	53.23	RS1	150.11	97.593	20.105	27.043	107.06	18.32	115.97	53.955	27.6	56.396	58.35	26	102.01	45.35	3.4081	68.925	48.171	1.3151	84.579	33.081	27.344	83.828	27.187	0.577	84.614	43.41	1.9201
1823	Male	54.96	RS1	150.59	111.14	37.993	26.51	104.6	32.456	118.41	70.557	60.4	52.978	70.068	57.2	107.08	43.27	18.708	72.527	42.714	18.064	86.303	44.555	68.486	90.523	15.628	25.302	91.174	32.57	13.594
1824	Female	53.3	RS1	156.78	107.96	26.038	23.173	108.12	25.533	119.87	70.068	40.4	59.326	70.557	40.4	110.62	49.227	5.7795	69.443	50.364	6.6202	89.691	42.826	43.449	88.932	27.795	6.2119	89.777	42.19	2.9224
1825	Male	55.09	RS1	158.22	112.93	20.706	22.41	106.27	17.193	122.31	64.209	38.8	59.814	63.721	36.4	109.01	44.619	5.3869	75.284	43.593	4.87	90.42	38.957	45.049	91.315	19.035	7.2618	91.237	36.773	2.1917
1826	Male	54.53	RS1	154.8	94.527	39.6	21.831	95.745	33.77	121.34	60.791	55.6	53.955	58.838	53.2	106.55	34.605	17.732	69.189	34.669	16.139	87.845	33.728	62.938	89.133	8.4067	25.79	88.72	24.976	11.633
1827	Female	55.11	RS1	148	106.48	37.197	28.027	100.93	42.017	121.34	67.627	58.8	60.303	66.162	61.2	106.92	45.456	23.564	72.509	42.643	24.495	92.15	44.037	68.186	92.276	20.673	29.96	90.435	35.508	18.898
1828	Female	54.18	RS1	152.64	106.44	27.048	26.642	104.66	31.218	120.85	58.838	44.4	58.35	57.373	45.2	107.69	43.898	6.5961	68.729	42.953	7.8223	89.841	38.277	50.742	89.201	21.256	10.896	87.953	36.438	2.0261
1829	Female	53.66	RS1	149.65	100.19	27.24	24.322	96.783	27.123	119.38	59.326	44.4	56.885	57.861	45.2	105.31	39.203	8.0434	70.085	37.543	8.4527	88.889	35.87	50.454	88.712	14.324	12.27	87.92	30.629	1.8854
1830	Female	54.82	RS1	151.72	99.651	35.778	26.014	98.37	42.776	121.34	62.256	58.8	60.303	61.768	62	103.62	41.501	18.612	72.004	41.396	21.185	92.362	42.037	68.056	87.073	18.467	26.824	86.78	33.432	15.39
1831	Female	54.76	RS1	147.74	108.94	28.975	23.422	113.3	27.301	114.01	70.557	43.6	53.955	72.998	43.6	100.38	55.269	5.6716	65.859	57.169	6.202	83.358	45.971	42.863	83.429	38.431	4.3667	82.624	51.346	2.7774
1832	Male	54.13	RS1	156.99	102.68	32.661	27.335	103.86	26.276	122.31	63.232	48.4	58.35	62.256	46	110.28	44.24	5.4554	75.412	43.388	5.2174	91.305	36.627	55.546	90.099	19.217	9.7907	92.564	35.584	1.6816
1833	Female	54.98	RS1	145.7	102.49	34.28	20.337	100.61	43.472	112.06	65.674	59.6	59.326	66.162	63.6	96.256	39.731	17.866	67.114	39.79	20.301	84.191	40.732	66.518	80.799	17.711	24.331	80.553	32.953	12.027
1834	Male	54.72	RS1	158.49	107.33	29.176	22.511	103.01	24.128	122.8	61.768	42	59.326	58.838	41.2	113.9	43.732	7.0263	74.402	40.857	5.7951	91.609	39.251	45.161	95.83	18.666	9.2439	95.066	34.774	1.2672
1835	Male	53.57	RS1	154.82	90.723	29.361	19.965	96.482	34.384	120.36	57.373	54.8	55.908	59.326	58.8	103.99	31.664	19.767	63.739	32.528	21.815	88.303	29.843	68.245	81.234	5.2955	28.634	82.732	22.648	15.797
1836	Male	53.35	RS1	161.48	101.38	23.537	25.177	102.71	19.917	126.71	50.049	34	57.861	50.537	30	113.77	33.449	4.8121	75.336	35.753	4.6857	92.098	26.063	35.219	95.276	9.3513	5.1489	94.731	27.641	3.3812
1837	Female	54.62	RS1	153.04	105.89	36.898	26.353	95.1	41.562	124.27	64.697	57.2	64.209	59.326	60.4	109.77	42.985	21.132	77.774	39.29	24.699	95.877	38.489	66.837	94.997	15.739	27.62	93.838	32.822	16.51
1838	Male	53.87	RS1	157.83	98.897	20.51	14.572	105.39	22.085	113.04	54.932	31.6	51.514	57.373	34	97.12	36.971	5.1804	62.279	38.924	4.7067	81.033	31.334	39.596	78.038	15.66	5.6556	77.341	31.791	2.2046
1839	Female	54.34	RS1	149.84	112.06	32.212	31.01	99.751	27.912	125.73	64.697	42.8	64.697	57.861	42.8	113.88	49.104	7.2601	78.902	45.349	6.6887	96.92	40.788	50.87	98.969	21.344	9.5832	97.698	39.698	3.1048
1840	Female	53.47	RS1	151.81	117.14	31.817	29.411	105.17	34.929	121.83	72.51	49.2	66.65	68.603	50.8	108.79	54.276	8.5343	78.454	51.047	9.432	96.489	48.066	53.942	96.19	31.662	10.793	93.382	46.619	2.9957
1841	Male	53	RS1	157.25	103.24	29.435	21.202	101.96	20.824	119.38	59.814	42.8	56.396	59.326	38	109.88	40.9	4.7441	72.742	40.917	6.6801	88.105	36.256	46.158	91.677	16.025	7.5077	93.118	32.713	3.6981
1842	Female	54.36	RS1	149.59	114.99	34.439	30.075	105	34.214	125.24	70.557	50.8	62.256	66.162	51.6	110.99	54.511	11.833	77.29	51.391	12.078	95.89	47.005	56.029	97.356	29.168	13.769	95.035	46.749	5.9859
1843	Male	53.94	RS1	155.95	108.33	33.833	22.053	114.19	28.599	118.41	62.744	49.2	54.932	64.697	46	106.5	45.036	6.9463	68.219	47.554	6.0742	85.492	38.163	52.595	85.21	15.87	9.5776	87.183	38.241	2.0473
1844	Female	54.71	RS1	147.86	113.91	25.302	23.699	112.15	27.99	115.97	69.58	41.2	54.932	68.603	42.8	97.991	55.084	5.9209	69.971	56.39	5.2895	85.989	46.701	45.05	84.093	35.785	5.1687	83.518	51.232	0.49384
1845	Female	54.05	RS1	150.29	109.34	24.524	19.039	122.68	23.969	112.55	62.744	39.6	46.143	70.068	38.8	97.788	47.581	4.7476	56.102	50.758	2.5407	76.631	40.258	42.963	70.528	26.071	4.8142	75.424	42.65	-0.50541
1846	Male	54.76	RS1	151.2	106.52	41.926	24.678	109.07	32.786	116.94	67.139	55.6	57.373	67.139	51.6	107.4	50.911	13.123	69.252	51.163	11.995	87.264	45.214	63.869	88.861	22.477	16.606	88.739	42.228	6.988
1847	Female	54.01	RS1	151.95	119.87	31.44	27.949	114.75	34.2	122.31	76.904	50.8	60.303	73.486	52.4	106.97	56.607	10.344	75.416	54.831	11.013	93.1	50.424	56.251	92.394	32.059	13.639	91.434	47.857	4.6494
1848	Female	54.13	RS1	150.77	107.08	28.603	26.09	109.46	30.184	119.87	69.092	51.6	54.443	69.58	54.8	101.48	42.76	14.165	69.515	42.841	15.234	86.419	38.775	55.675	84.978	23.749	21.177	85.005	37.047	11.106
1849	Male	54.39	RS1	156.19	98.857	33.929	29.161	98.427	33.334	122.31	62.256	56.4	63.232	61.279	56.4	113.55	37.84	19.419	74.402	36.518	18.155	92.31	36.171	64.887	95.76	11.248	23.162	94.614	26.799	11.025
1850	Male	54.71	RS1	152.44	105.61	28.473	18.885	104.54	26.268	114.99	64.697	46.8	54.443	62.744	46.8	101.88	41.194	6.313	66.289	40.843	6.5054	84.83	36.096	55.896	83.662	13.952	10.059	84.348	33.365	0.5217
1851	Female	54.11	RS1	147.03	104.97	35.769	31.584	101.99	28.635	117.92	65.674	51.6	59.814	63.232	48.4	107.13	47.861	13.021	75.907	46.806	11.031	88.678	41.945	54.81	91.065	25.241	16.852	91.445	42.174	6.2312
1852	Female	52.88	RS1	147.88	105.96	29.925	27.595	104.81	28.411	120.36	63.721	45.2	57.373	61.768	44.4	107.11	44.443	8.6699	73.325	43.169	7.9688	90.329	39.166	49.869	91.165	23.331	9.4479	90.896	37.275	1.8486
1853	Male	53.08	RS1	156.29	105.31	27.159	27.916	100.71	29.869	124.27	59.326	42	62.744	57.373	42	110.72	41.155	7.8196	74.255	40.039	7.293	93.536	33.56	48.754	93.243	13.574	10.402	92.881	32.546	2.3171
1854	Female	53.29	RS1	156.27	106.35	37.648	25.434	114.44	24.853	120.85	66.162	47.6	55.908	70.068	40.4	109.83	49.006	6.3919	73.412	50.511	4.8619	87.476	44.556	48.657	92.029	27.898	8.343	92.461	43.394	0.20599
1855	Female	53.04	RS1	155.73	120.55	32.564	29.561	108.36	30.312	126.71	75.439	46.8	63.232	69.092	45.2	113.33	60.327	8.9198	81.515	56.551	7.7864	96.726	52.993	54.416	100.02	32.813	10.291	98.135	51.02	2.628
1856	Female	52.92	RS1	149.98	99.734	48.916	28.14	106.79	45.058	115.48	55.42	66.8	56.396	59.326	64.4	104.49	36.682	29.642	64.694	38.578	29.041	84.212	41.109	72.685	83.346	12.987	34.647	83.934	28.969	21.524
1857	Male	54.39	RS1	155.91	114.31	30.499	21.595	105.87	34.324	122.31	69.092	49.2	59.814	66.65	52.4	111.46	45.532	10.465	73.749	42.169	11.882	93.253	42.916	58.407	95.196	16.81	15.944	93.287	33.73	3.6208
1858	Male	53.25	RS1	157.8	102.01	20.49	19.698	99.302	25.101	127.2	53.955	33.2	57.861	49.561	35.6	110.56	40.805	5.9982	74.806	39.006	6.3004	95.456	26.1	40.809	94.721	11.22	5.3162	93.685	34.347	1.6537
1859	Male	53.83	RS1	156.19	96.784	33.884	18.237	112.15	39.244	118.9	64.697	59.6	50.537	68.603	61.2	103.42	44.438	17.399	63.545	46.834	17.914	83.141	43.548	66.451	83.959	19.556	26.959	82.422	36.557	12.972
1860	Female	52.75	RS1	158.43	105.26	40.852	31.671	103.59	33.339	125.73	66.162	52.4	66.162	66.65	47.6	115.3	49.416	11.821	84.061	48.032	10.639	96.236	39.275	55.519	100.79	24.889	11.55	100.3	42.329	3.5142
1861	Male	54.19	RS1	148.72	93.985	29.392	22.621	103.86	32.036	111.57	51.025	47.6	50.537	56.396	48.4	95.026	35.039	7.4202	60.175	38.918	8.2747	79.307	29.17	54.084	75.407	9.202	9.423	76.696	29.298	1.2263
1862	Male	54.38	RS1	153.24	106.33	24.621	19.8	106.2	25.897	116.46	60.303	38	52.002	62.744	38.8	103.67	48.104	7.0058	63.841	49.255	6.0669	83.737	36.733	40.238	81.997	24.676	5.6135	83.286	43.374	3.7521
1863	Female	53.74	RS1	147.45	112.88	27.321	23.587	116.43	28.807	115.97	71.533	41.2	52.978	73.486	42	102.04	60.473	5.8969	65.693	61.842	6.1487	83.488	48.99	44.308	81.508	38.042	5.9834	84.038	54.65	2.7963
1864	Female	53.45	RS1	155.58	104.82	36.86	27.164	102.92	27.312	122.8	61.279	50	61.279	59.814	45.2	111.68	47.745	9.3902	76.46	47.043	8.6664	92.735	40.275	54.148	94.905	25.876	9.8529	94.823	41.966	2.5902
1865	Male	54.64	RS1	156.33	120.48	28.382	25.18	112.57	21.205	123.29	76.904	37.2	60.303	72.021	34	110.14	64.887	6.2566	77.592	62.91	5.5606	93.346	51.884	40.44	93.751	39.612	5.5198	95.377	58.637	2.9594
1866	Female	53.48	RS1	146.8	96.505	29.756	26.632	106.15	29.763	113.53	55.42	47.6	52.002	61.279	48.4	97.625	40.132	6.627	61.253	44.947	6.1959	80.128	40.222	51.7	74.724	19.96	8.0589	77.492	36.607	-0.37382
1867	Male	53.93	RS1	153.7	106.32	40.148	23.687	103.29	34.302	120.85	60.303	58.8	55.908	59.326	56.4	109.12	38.956	19.269	71.551	38.659	17.922	88.275	40.356	65.61	90.465	14.303	24.01	90.795	30.269	11.616
1868	Male	54.25	RS1	146.11	104.95	21.571	13.256	107.36	28.496	114.99	58.838	38.8	45.654	59.814	44.4	95.924	41.785	4.386	56.981	42.922	4.7109	79.744	30.687	43.504	73.957	16.678	4.4438	75.007	35.54	-0.6027
1869	Female	53.06	RS1	156.24	112.47	23.788	32.36	107.76	20.763	128.66	66.65	29.2	67.139	64.697	27.6	116.81	52.602	2.6061	82.872	51.487	2.1586	100.04	43.485	31.785	99.982	31.125	0.10156	99.84	47.759	-0.47685
1870	Male	54.64	RS1	147.78	97.881	22.659	22.386	101.93	30.444	115.97	54.932	44.4	52.978	57.373	49.2	101.31	40.586	5.7981	61.388	45.531	8.4258	85.113	32.225	52.619	81.949	12.773	8.7312	81.609	36.519	1.4504
1871	Male	54.52	RS1	154.65	109.71	43.055	22.829	108.81	40.255	119.87	68.115	54.8	54.443	68.603	54	106.58	49.623	19.809	65.969	49.898	19.22	88.188	40.783	57.491	85.64	25.031	19.516	85.631	42.932	11.252
1872	Female	53.46	RS1	155.34	109.03	33.712	38.212	100.5	17.46	127.2	66.162	48.4	69.092	61.279	40.4	121.98	42.608	6.8252	86.53	39.759	5.0863	98.708	39.346	49.008	104.52	18.006	7.7931	104.79	32.288	1.0062
1873	Female	54.28	RS1	145.51	109.36	28.537	25.776	110.69	28.132	113.53	67.627	42.8	53.467	68.603	42.8	99.804	50.483	5.9221	67.423	52.434	6.1065	83.558	42.609	48.861	82.613	28.687	8.5047	84.032	44.547	1.8591
1874	Female	54.5	RS1	149.9	106.3	42.561	24.084	108.6	35.946	114.01	66.162	56.4	55.42	67.627	54	103.69	45.386	15.462	67.954	44.918	13.151	85.051	41.645	57.899	85.383	22.392	20.568	85.826	37.511	8.1028
1875	Female	54.15	RS1	150.5	105.46	24.502	22.163	107.61	34.172	117.43	60.791	44.4	57.373	62.256	46.8	99.622	42.109	6.5279	69.627	42.659	6.5788	87.572	36.402	48.979	86.168	16.43	8.2515	84.729	34.295	1.6963
1876	Female	53	RS1	161.19	118.35	41.391	39.126	100.93	33.341	135.5	74.951	58.8	73.975	66.162	54.8	126.82	56.459	17.811	92.935	50.663	14.599	106.33	50.575	62.109	113.98	34.835	21.062	111.73	48.726	11.327
1877	Female	54.14	RS1	152.61	88.237	38.774	21.746	93.12	42.862	119.38	49.072	63.6	48.584	52.978	66	97.446	27.975	25.164	66.304	30.548	26.209	82.942	27.697	71.971	79.654	10.019	31.991	80.882	23.507	20.526
1878	Female	54.12	RS1	151.67	100.81	39.545	31.863	100.87	32.591	120.85	64.209	59.6	61.279	63.721	57.2	110.59	36.893	22.746	78.098	35.032	22.292	90.758	42.786	69.147	95.742	16.831	32.142	95.539	28.347	17.964
1879	Male	54.08	RS1	154.12	102.13	31.642	24.979	101.44	32.148	122.31	58.838	52.4	58.35	61.279	52.4	108.65	38.95	13.472	68.328	38.575	13.46	90.171	37.008	60.447	90.993	11.915	20.227	88.505	29.977	8.3072
1880	Male	53.22	RS1	157.79	94.398	32.152	17.797	103.05	31.415	115.97	50.049	52.4	50.049	54.932	50.8	100.87	28.155	11.481	58.282	31.625	13.257	81.25	27.801	58.141	77.614	3.1517	17.66	78.776	21.259	6.2517
1881	Male	53.34	RS1	150.93	106.57	28.688	23.864	103.82	31.684	118.9	67.139	43.6	58.35	65.674	46	106.34	50.287	5.4479	68.041	48.546	5.0701	89.761	38.647	51.347	89.496	23.386	9.8519	87.33	41.064	2.4395
1882	Male	52.62	RS1	163.68	101.46	41.244	22.956	94.182	31.725	128.17	57.861	65.2	59.326	53.955	61.2	117.2	29.747	20.827	75.999	28.134	19.307	93.984	28.403	72.159	94.242	1.996	27.762	95.88	17.511	12.903
1883	Male	53.08	RS1	157.17	103.09	22.531	24.735	96.266	25.36	128.17	56.396	36.4	59.814	52.002	38.8	112.86	40.288	5.1046	77.828	39.571	5.0194	96.114	30.166	42.039	96.98	20.561	4.9555	97.205	35.267	1.925
1884	Male	52.78	RS1	161.65	104.51	41.338	23.671	102.14	34.288	123.29	63.232	62.8	57.861	62.256	58.8	109.61	39.393	24.052	75.843	38.063	20.137	91.096	38.992	70.388	94.856	11.895	31.042	94.812	29.476	16.973
1885	Female	53.78	RS1	158.86	103.02	35.285	29.114	94.157	33.614	127.69	63.721	54	64.697	61.279	53.2	113.97	49.28	10.005	80.637	46.402	8.2826	97.597	39.884	58.001	100.29	26.027	9.7751	98.361	41.909	2.4042
1886	Male	53.23	RS1	150.54	92.699	44.211	21.435	97.848	45.969	118.41	57.373	69.2	52.49	60.303	70.8	101.63	29.127	29.53	62.409	30.856	29.239	86.243	31.74	78.503	83.384	6.1946	40.387	81.66	20.515	25.138
1887	Male	53.06	RS1	160.47	105.16	26.88	29.128	95.601	18.876	129.64	54.443	42	66.162	48.096	38	122.88	39.134	5.7547	84.061	33.432	5.9595	99.449	29.713	48.402	103.94	8.9724	8.5484	105.72	27.767	2.9528
1888	Male	53.15	RS1	157.44	106.58	28.861	23.062	96.475	30.492	125.24	58.838	42	59.326	55.908	43.6	109.5	41.352	5.0388	73.923	39.378	4.8213	92.658	34.854	48.648	94.234	14.645	5.9378	92.973	32.763	0.33386
1889	Female	53.15	RS1	151	100.21	39.686	21.419	96.37	44.805	117.92	57.861	57.2	56.885	56.885	60.4	104.14	39.04	19.669	69.44	37.24	20.097	88.726	36.52	64.148	88.248	16.387	26.828	86.901	30.462	15
1890	Female	54.33	RS1	149.31	102.4	44.745	23.29	97.278	39.994	114.01	64.209	59.6	57.373	62.256	58	107.75	42.308	28.267	71.675	40.315	26.157	87.415	42.819	67.588	91.423	20.167	31.568	90.711	33.689	20.82
1891	Male	53.42	RS1	153.99	105.67	23.808	22.701	108.68	23.92	120.36	63.232	34.8	56.396	64.697	35.6	107.72	43.539	5.1469	68.999	43.835	5.2036	87.707	39.642	35.998	89.502	23.014	3.9571	88.955	36.324	2.1272
1892	Male	53.63	RS1	152.32	94.011	39.303	21.78	100.38	33.899	116.94	48.584	60.4	48.584	51.025	58	100.08	32.145	18.029	59.72	35.003	15.591	79.515	27.148	69.124	78.032	5.5139	23.497	79.061	24.367	11.279
1893	Female	52.47	RS1	149.23	102.97	44.417	24.12	106.25	40.192	115.97	68.115	66	52.002	70.068	65.2	102.65	41.43	35.171	67.575	41.254	34.374	83.11	45.249	76.081	86.355	22.591	42.796	86.214	33.803	30.635
1894	Male	54.01	RS1	151.36	93.488	32.906	23.031	90.649	37.522	115.97	57.373	52.4	56.396	56.885	54	104.27	36.029	10.942	66.139	35.514	12.575	86.199	35.389	59.446	84.878	9.0406	15.198	85.008	25.791	4.0231
1895	Male	53.04	RS1	150.95	108.05	27.203	19.592	108.08	30.18	115.48	63.232	47.6	54.932	64.209	49.2	103.34	40.861	12.141	63.245	40.131	11.352	84.535	38.471	56.866	86.231	14.554	16.494	83.69	30.485	4.9802
1896	Male	54.02	RS1	155.26	105.37	34.502	18.851	108.38	30.459	117.43	59.326	46.8	51.025	60.303	46	103.59	37.502	7.1933	65.819	38.375	7.8506	84.732	32.3	52.094	84.234	7.3191	12.698	85.276	28.243	1.2427
1897	Female	54.01	RS1	150.08	119.65	29.128	23.16	107.81	33.459	119.87	75.928	47.6	62.744	70.557	50	108.92	54.667	8.9545	74.726	49.814	9.6026	94.055	51.287	55.449	93.694	30.981	13.082	91.918	44.929	2.7582
1898	Female	52.49	RS1	145.25	100.93	40.674	31.896	111.44	23.281	113.04	65.674	51.6	53.467	71.533	42.8	100.92	52.957	7.0903	71.475	55.265	4.4783	80.718	46.341	51.641	83.418	31.589	7.2258	85.796	47.432	0.2303
1899	Male	52.4	RS1	156.37	113.78	35.006	23.517	107.14	30.587	125.24	67.627	50	58.35	64.697	48.4	113.39	49.44	7.4225	74.718	46.251	5.4686	92.703	35.533	55.329	97.624	19.717	6.3366	94.763	40.431	0.18463
1900	Male	53.37	RS1	159.25	113.75	22.757	23.641	102.73	20.461	130.62	60.791	34.8	61.279	55.908	34	116.69	46.182	4.0532	79.079	43.725	4.2712	98.204	33.031	38.739	99.117	21.143	4.7841	98.34	39.512	2.1723
1901	Female	54.29	RS1	151.59	108.36	31.889	32.474	103.46	38.238	124.27	68.115	48.4	66.162	65.674	53.2	111.2	48.788	9.7117	75.313	46.655	11.81	96.907	44.271	55.579	96.026	24.66	13.19	93.892	41.33	3.3847
1902	Female	53.9	RS1	150.34	111.86	42.827	26.784	108.52	35.799	120.36	71.533	61.2	57.861	73.486	59.6	107.78	54.78	27.479	71.297	52.899	24.104	88.706	51.72	68.89	91.015	31.972	30.202	89.559	47.248	20.42
1903	Female	53.5	RS1	150.39	104.97	37.113	32.626	104.82	29.485	121.83	63.232	50	60.791	63.721	46.8	108.32	45.595	9.798	78.437	45.017	8.9398	91.516	38.283	52.503	93.02	23.288	10.081	93.064	39.507	2.9506
1904	Female	54.27	RS1	150.69	112.13	42.922	29.006	117.49	35.738	117.92	73.975	50	56.885	77.881	46.8	104.7	59.857	5.8823	70.049	62.13	5.0819	85.326	49.273	53.821	86.095	34.707	7.0596	87.254	54.139	-1.0494
1905	Female	54.17	RS1	149.79	97.317	27.396	26.372	103.05	25.587	118.41	64.697	43.6	57.373	68.115	43.6	103.18	46.408	3.8224	70.355	49.379	4.6759	86.083	37.793	46.28	86.755	23.787	5.8331	87.409	41.394	-0.61202
1906	Female	52.92	RS1	149.67	100.05	41.999	31.916	100.43	33.523	117.92	64.209	56.4	61.279	64.209	53.2	110.1	50.675	15.225	74.975	48.627	13.559	89.464	42.062	57.853	92.982	24.6	16.924	93.254	43.17	8.0262
1907	Male	54.23	RS1	163.55	108.13	37.899	30.41	88.807	38.822	136.47	62.256	58.8	71.045	52.002	59.6	125.51	38.692	21.4	85.807	31.231	20.609	106.78	35.507	65.783	110.63	11.139	26.424	107.37	26.24	14.336
1908	Male	53.03	RS1	154.16	93.989	37.635	20.988	99.634	39.986	119.38	58.838	74	54.932	62.256	74	102.61	25.019	43.445	61.593	26.942	43.101	85.372	39.575	87.584	83.222	4.1277	51.582	81.169	17.133	37.958
1909	Female	53.45	RS1	150.74	112.02	31.759	31.045	114.99	29.035	121.83	77.393	44.4	58.838	76.904	44.4	107.96	62.001	6.4528	73.989	62.336	6.7794	90.593	52.342	48.476	93.25	41.666	6.2274	92.529	56.769	0.43297
1910	Male	52.18	RS1	156.73	105.03	24.438	18.915	100.17	37.591	122.31	65.674	49.2	57.861	64.209	57.2	105.67	48.185	9.5749	69.223	45.25	11.627	93.258	41.411	61.361	90.041	20.452	13.478	87.253	38.668	3.7316
1911	Male	54.03	RS1	157.32	115.25	30.178	31.84	105.44	23.783	130.13	69.58	43.6	65.674	65.674	38.8	117.8	56.162	9.762	83.834	53.536	8.9883	98.684	45.646	47.234	102.33	27.909	12.039	102.23	47.882	5.1739
1912	Male	53.23	RS1	156.87	95.752	43.982	23.9	106.18	36.146	118.9	54.443	59.6	53.467	59.814	55.6	105.66	32.468	14.695	69.277	37.292	13.256	84.697	34.202	64.292	85.844	9.4448	20.589	87.653	25.823	7.5142
1913	Male	52.76	RS1	158.84	90.953	31.821	23.386	94.756	29.768	126.22	52.002	59.6	55.908	52.49	60.4	112.73	22.74	21.077	67.262	22.768	22.315	91.673	27.183	73.127	90.63	1.8193	28.762	89.412	11.413	14.493
1914	Female	52.82	RS1	151.93	107.86	35.92	34.118	102.78	34.221	125.24	65.186	47.6	63.721	62.256	46.8	111.69	51.077	5.8158	77.851	49.591	5.4799	95.33	38.856	49.406	100.11	24.935	7.7063	96.694	43.63	0.58887
1915	Female	53.96	RS1	151.01	101.73	32.248	21.257	88.748	39.844	122.8	56.396	55.6	58.35	52.002	60.4	105.73	32.231	20.363	74.609	28.871	22.691	92.258	33.927	65.452	91.943	10.955	27.864	90.411	24.115	16.503
1916	Male	53.68	RS1	156.4	89.07	35.072	23.03	94.166	28.374	118.9	44.678	52.4	52.978	47.119	49.2	106.61	25.282	13.334	67.53	26.793	12.693	85.517	24.919	57.294	88.734	1.7311	17.273	87.296	18.44	6.3402
1917	Male	54.13	RS1	152.1	107.66	29.706	19.061	102.53	34.381	118.9	63.232	53.2	59.326	60.791	55.6	106.89	42.833	15.975	66.083	39.863	17.366	88.929	40.288	61.463	89.787	15.031	24.579	87.32	32.525	12.063
1918	Female	53.61	RS1	159.78	119.74	32.864	32.125	115.51	31.605	127.69	74.951	42.8	67.139	74.463	40.4	115.96	56.047	5.8396	82.312	55.895	5.4496	98.331	46.833	46.917	99.824	35.323	6.6349	99.786	50.578	0.26914
1919	Female	53	RS1	149.08	105.04	30.796	23.645	102.45	28.407	119.38	62.256	46.8	54.932	60.791	45.2	108.71	46.882	8.8102	71.045	44.025	8.8164	87.564	38.282	49.001	92.077	22.163	9.9827	91.53	38.968	1.9061
1920	Female	53.29	RS1	155.52	115.28	41.116	29.062	115.79	30.704	119.38	78.857	55.6	59.814	79.346	50.8	111.53	56.146	19.599	74.456	55.336	16.352	88.84	55.344	60.013	91.899	30.178	22.082	92.694	47.262	11.349
1921	Male	52.3	RS1	154.32	100.35	33.369	29.103	97.862	27.729	124.76	55.42	46.8	60.791	53.467	43.6	113.29	38.151	4.759	78.39	37.702	4.5634	94.402	27.126	49.772	95.328	12.953	5.6437	96.001	31.19	-0.13547
1922	Male	53	RS1	164.08	97.639	17.858	20.785	92.251	20.749	131.1	39.795	33.2	59.814	36.865	36.4	116	25.342	3.8543	74.063	21.671	3.6346	96.768	14.323	42.325	95.828	0.93491	4.2911	95.834	17.76	0.61364
1923	Male	52.5	RS1	162.77	114.54	39.073	21.894	103.17	30.597	130.13	58.838	52.4	59.326	56.396	46.8	122.23	45.481	13.338	75.381	41.02	10.822	95.795	38.756	55.64	102.17	18.588	14.282	100.07	37.219	6.4182
1924	Female	53.93	RS1	148.08	101.57	30.981	23.402	111.67	27.628	114.99	62.744	54	46.143	69.092	50.8	96.024	46.574	13.701	61.712	51.895	12.885	77.515	41.238	56.217	74.627	27.219	20.063	77.189	41.51	8.9519
1925	Female	53.62	RS1	158.71	104.49	41.441	35.041	100.43	38.406	129.64	58.35	58.8	68.603	56.396	58	116.86	37.743	19.699	83.675	36.23	18.792	99.09	34.264	63.391	101.26	16.027	26.173	100.47	29.554	13.935
1926	Female	52.63	RS1	150.97	99.952	32.262	27.299	101.1	28.515	121.34	56.885	42	57.861	58.35	38.8	105.33	47.429	6.0017	72.786	47.397	5.4455	89.391	35.308	45.165	89.932	25.653	6.7129	89.852	41.909	2.9827
1927	Male	52.87	RS1	154.39	100.95	27.208	21.08	99.499	27.179	117.92	62.256	50.8	57.373	61.768	51.6	106.35	38.501	8.4813	67.872	38.377	9.1637	88.215	36.201	57.132	86.853	16.634	13.348	86.8	31.32	3.5152
1928	Male	53.54	RS1	155.47	106.36	29.956	23.419	102.82	32.083	123.29	60.791	49.2	58.838	58.35	50.8	107.07	38.3	12.05	70.551	36.445	11.419	90.299	35.408	57.936	89.835	13.744	16.561	88.951	28.548	7.0294
1929	Female	54.13	RS1	148.44	104.4	34.836	24.669	111.01	45.884	118.41	60.791	53.2	52.978	64.697	59.6	97.476	40.238	22.997	67.115	41.074	25.695	84.28	37.89	60.38	80.936	17.3	26.135	81.326	33.903	17.398
1930	Female	53.01	RS1	152.48	97.486	41.42	26.779	116.93	23.604	111.57	63.232	56.4	49.561	72.51	47.6	97.405	41.8	15.982	62.945	48.991	11.43	75.86	45.594	58.1	72.982	23.213	19.046	78.379	37.983	8.248
1931	Female	51.89	RS1	154.33	104.41	35.697	24.396	104.63	34.131	118.9	65.674	51.6	57.373	66.65	50.8	105.39	46.796	15.519	71.473	46.652	15.514	88.127	41.436	56.684	87.433	24.648	19.476	87.678	41.646	9.4539
1932	Male	53.67	RS1	154.66	112.98	33.648	23.982	99.533	33.666	123.78	69.58	54.8	61.279	63.721	53.2	113.17	48.16	13.45	75.668	44.797	13.945	94.007	40.824	60.907	97.271	19.713	16.202	95.285	39.447	6.8786
1933	Female	53.11	RS1	143.46	96.828	43.784	29.209	93.802	45.938	114.99	58.35	62.8	57.861	58.35	65.2	100.92	40.844	27.084	72.221	40.483	28.488	86.674	37.302	68.867	87.041	22.171	31.983	86.669	35.2	22.83
1934	Female	53.4	RS1	157.98	105.25	34.651	25.654	97.959	28.944	126.22	59.326	50	59.326	55.42	46	113.08	42.63	11.65	77.202	40.771	9.5759	93.86	35.018	54.346	95.395	18.47	14.083	96.299	34.655	5.606
1935	Female	53.74	RS1	156.3	99.26	40.464	28.879	95.498	32.357	125.24	59.326	48.4	62.744	54.932	44.4	115.66	39.34	10.071	80.622	37.462	8.536	96.294	32.06	50.929	99.291	17.123	10.665	99.215	31.951	2.7683
1936	Female	53.38	RS1	147.24	115.3	28.187	27.119	110.03	32.936	119.87	76.416	39.6	58.838	74.951	41.2	107.17	65.965	5.1886	69.069	59.983	5.7061	90.14	48.854	43.612	92.483	38.574	6.8091	89.336	56.932	2.4705
1937	Male	53.02	RS1	157.43	99.82	23.145	21.088	99.941	26.619	124.76	49.072	44.4	53.467	50.537	46.8	108.57	31.451	5.4775	69.712	30.112	5.9629	90.319	23.017	53.348	90.604	1.508	9.3549	89.449	22.144	0.82767
1938	Female	53.9	RS1	153.95	110.83	30.262	25.275	107.35	25.447	121.83	70.068	48.4	59.814	67.139	46	110.14	47.939	12.04	73.856	47.383	10.872	91.381	46.336	53.385	91.653	24.867	16.485	92.103	40.06	6.6647
1939	Male	53.51	RS1	160.28	113.23	25.455	20.732	109.18	30.534	126.71	65.674	45.2	55.42	64.209	48.4	110.19	41.705	13.589	68.312	41.118	14.028	91.189	41.822	55.814	87.961	12.942	18.574	87.879	32.07	6.7917
1940	Male	52.74	RS1	150.58	100.61	27.407	23.379	101.75	27.879	116.46	61.768	51.6	55.42	63.232	51.6	101.97	46.795	9.3648	68.47	47.756	9.1583	86.827	41.003	58.549	87.103	17.937	15.191	86.078	38.891	3.5022
1941	Male	53.33	RS1	155.41	102.4	28.125	16.175	99.387	30.811	118.41	59.326	51.6	54.443	57.373	54	105.15	35.425	12.399	65.457	34.9	12.848	87.454	34.714	61.809	85.701	8.8569	16.421	85.322	27.55	6.3248
1942	Male	51.96	RS1	152.43	106.3	23.651	24.603	107.41	23.8	120.85	60.303	30.8	56.396	59.326	31.6	108.21	43.556	4.5539	71.029	43.916	4.2392	89.628	34.825	36.032	91.703	21.47	3.8928	91.352	38.615	1.8673
1943	Female	52.71	RS1	151.98	109.61	34.256	32.091	110.72	32.814	120.36	74.951	50	62.256	75.928	50	109.01	53.402	13.903	76.165	51.945	12.207	92.168	48.048	55.023	95.421	29.772	16.937	93.811	45.265	7.4733
1944	Male	53.76	RS1	154.46	101.74	24.407	20.321	93.505	23.567	122.31	60.791	53.2	57.373	55.908	52.4	110.27	38.098	10.18	72.502	34.312	10.74	90.964	33.452	63.58	94.033	12.976	14.989	92.767	29.3	4.4724
1945	Female	53.4	RS1	153.24	100.43	39.506	32.792	108.61	22.588	120.36	57.373	43.6	56.885	61.279	34.8	111.27	48.8	6.3718	75.23	50.986	4.828	87.212	33.871	42.561	91.079	29.736	4.8247	94.552	44.13	2.8897
1946	Female	53.02	RS1	150.84	102.37	34.733	26.642	110.03	30.811	118.9	60.303	51.6	52.49	63.232	50	108.27	47.457	14.769	66.28	50.219	13.043	85.524	42.35	58.174	84.933	26.899	15.992	86.85	43.088	8.033
1947	Male	52.97	RS1	154.78	95.746	40.364	23.877	92.919	49.46	129.15	52.002	76.4	61.768	51.025	82	113.38	26.407	40.233	71.961	23.688	43.491	97.462	30.919	94.362	94.91	3.0242	52.632	93.105	15.169	36.426
1948	Female	52.64	RS1	149.21	114.33	28.594	25.23	119.04	26.629	116.94	70.557	38	52.49	72.998	36.4	101.45	59.678	3.6964	69.015	60.67	4.8388	83.82	51.513	40.609	85.156	38.905	6.0303	85.373	54.032	2.8246
1949	Female	52.42	RS1	148.27	115.4	24.49	29.249	107.68	30.057	123.29	71.045	38.8	62.744	66.65	42	110.09	52.011	5.2935	74.648	49.068	6.2707	95.005	43.285	45.639	94.238	23.346	8.8543	92.845	42.35	0.58845
1950	Female	52.18	RS1	155.24	114.99	22.377	27.379	107.86	25.015	124.76	70.557	42	64.209	67.139	43.6	113.26	50.422	6.4192	79.852	47.42	6.8596	96.136	45.633	48.881	101.52	22.046	11.733	99.733	39.812	1.4731
1951	Female	52.25	RS1	157.97	119.95	36.718	41.397	106.45	31.944	134.03	76.416	44.4	77.393	69.092	42.8	124.36	64.384	4.982	92.847	59.592	4.9812	108.18	52.433	45.274	111.4	43.364	5.7542	109.53	56.394	0.34498
1952	Male	52.9	RS1	156.16	99.581	26.808	25.734	100.94	33.731	126.71	58.838	44.4	59.814	60.303	47.6	110.84	43.471	8.4452	72.848	40.815	9.5487	93.378	38.392	54.518	91.84	13.916	12.442	92.314	33.471	2.7652
1953	Female	52.28	RS1	146.97	97.494	32.284	23.1	95.476	34.176	114.5	62.744	50.8	56.885	62.256	54	103.09	42.669	13.178	67.054	42.168	13.375	85.803	43.34	62.05	84.766	19.435	19.537	84.347	35.002	8.1148
1954	Male	52.49	RS1	149.73	104.18	28.759	21.892	100.63	32.339	114.99	59.814	46	53.955	58.838	48.4	100.95	40.637	9.6434	65.887	39.679	11.284	85.922	33.277	55.055	84.015	14.038	14.51	82.998	32.408	5.0203
1955	Female	52.87	RS1	150.23	99.042	26.413	21.609	98.101	31.28	116.94	57.861	50	53.467	58.838	53.2	101.44	39.712	9.2137	67.018	39.522	10.726	85.037	37.049	58.923	84.812	13.375	15.571	84.278	31.206	3.7873
1956	Female	52.2	RS1	154.11	98.11	35.862	26.957	92.678	29.963	124.27	52.49	49.2	59.326	50.537	46	109.78	38.335	7.0042	77.812	36.36	6.4756	92.562	26.814	50.929	94.284	14.487	7.0103	94.3	31.875	-0.98135
1957	Male	52.33	RS1	153.73	107.63	22.771	21.371	109.81	20.389	121.34	59.326	39.6	52.49	60.303	38.8	106.61	43.583	4.3435	70.752	43.698	6.0746	86.981	34.974	46.861	89.343	17.189	5.9234	89.91	36.3	1.6111
1958	Male	52.45	RS1	157.81	105.56	33.491	27.265	95.596	32.186	126.22	63.721	46.8	64.209	57.373	46.8	115.28	46.752	5.4959	77.695	44.624	5.9766	96.96	35.696	50.965	99.307	18.659	9.4034	98.065	38.241	2.9705
[truncated: 3,430 more rows]

## Sheet: Geno
id	rs4648477	rs4648478	rs7516150	rs7552331	rs1572037	rs1999527	rs4648379	rs1005999	rs2422239	rs2422241	rs6749293	rs16863422	rs12694574	rs2894450	rs974448	rs1978859	rs2034127	rs2034128	rs2034129	rs7628370	rs7617069	rs717463	rs894883	rs7640340	rs875143	rs6795519	rs2168809	rs9858909	rs4552364	rs4353811	rs13098099	rs13097965	rs17447439	rs6555969	rs2342494	rs10237319	rs10265937	rs10266101	rs10237838	rs10237488	rs10278187	rs10234405	rs6950754	rs6462544	rs7803030	rs12155314	rs9692219	rs1562006	rs1562005
[truncated: 5,388 more rows]
[truncated: 53 more columns]

[truncated: 2 more sheets: Map, Notes]
